# Supplementary material
Source: PubMed Central journal article supplement (PMC5028225)
Supplement: NIHMS796677-supplement-Supplemental_Tables.pdf [file NIHMS796677-supplement-Supplemental_Tables.pdf]

**Table S1: Plasmid content of transposon mutants on Tables 1 and 2<sup>a</sup>**

| <b>Location</b> | <b>Locus</b> | <b>Insertion Site</b> | <b>Plasmids Missing In Arrayed STM Stock</b> |
|-----------------|--------------|-----------------------|----------------------------------------------|
| chromosome      | BB_0050      | 47204                 | cp9                                          |
| chromosome      | BB_0050      | 47284                 | cp32-6                                       |
| chromosome      | BB_0050      | 47348                 | cp32-6,cp9                                   |
| chromosome      | BB_0116      | 113343                | Not Done                                     |
| chromosome      | BB_0157      | 158214                | none                                         |
| chromosome      | BB_0157      | 158431                | lp28-2                                       |
| chromosome      | BB_0163      | 163768                | none                                         |
| chromosome      | BB_0224      | 228894                | lp5                                          |
| chromosome      | BB_0224      | 228897                | Not Done                                     |
| chromosome      | BB_0224      | 228901                | lp5                                          |
| chromosome      | BB_0224      | 228925                | lp5                                          |
| chromosome      | BB_0241      | 246612                | Not Done                                     |
| chromosome      | BB_0241      | 247035                | lp5                                          |
| chromosome      | BB_0241      | 247989                | lp5                                          |
| chromosome      | BB_0243      | 248862                | Complete                                     |
| chromosome      | BB_0243      | 249253                | lp5, lp28-1                                  |
| chromosome      | BB_0243      | 249623                | lp5                                          |
| chromosome      | BB_0243      | 249691                | Complete                                     |
| chromosome      | BB_0408      | 420791                | Not done                                     |
| chromosome      | BB_0408      | 421350                | lp21,lp5                                     |
| chromosome      | BB_0420      | 431895                | cp9                                          |
| chromosome      | BB_0420      | 431973                | lp5                                          |
| chromosome      | BB_0420      | 432429                | cp9,lp28-2                                   |
| chromosome      | BB_0420      | 432489                | Complete                                     |
| chromosome      | BB_0420      | 434199                | lp5                                          |
| chromosome      | BB_0420      | 434321                | lp5                                          |
| chromosome      | BB_0420      | 434331                | lp38,lp5                                     |
| chromosome      | BB_0420      | 434674                | lp28-1,lp5                                   |
| chromosome      | BB_0629      | 659699                | lp28-1,lp5                                   |
| chromosome      | BB_0629      | 659840                | Complete                                     |
| chromosome      | BB_0629      | 660191                | Complete                                     |
| chromosome      | BB_0629      | 661151                | Not Done                                     |
| chromosome      | BB_0789      | 827550                | Complete                                     |
| chromosome      | BB_0825      | 869189                | cp9,lp5                                      |
| plasmid_cp26    | BB_B01       | 194                   | lp5                                          |
| plasmid_cp26    | BB_B04       | 2519                  | lp5, cp9                                     |
| plasmid_cp26    | BB_B04       | 2538                  | lp5                                          |
| plasmid_cp26    | BB_B04       | 2660                  | lp5, cp9                                     |
| plasmid_cp26    | BB_B04       | 2694                  | lp5, cp9                                     |
| plasmid_cp26    | BB_B04       | 2768                  | lp21, lp38                                   |
| plasmid_cp26    | BB_B04       | 2885                  | Complete                                     |

|              |        |       |          |
|--------------|--------|-------|----------|
| plasmid_cp26 | BB_B04 | 2963  | Not Done |
| plasmid_cp26 | BB_B04 | 3039  | Complete |
| plasmid_cp26 | BB_B05 | 4228  | lp5, cp9 |
| plasmid_cp26 | BB_B05 | 4354  | Not Done |
| plasmid_cp26 | BB_B06 | 4596  | Complete |
| plasmid_cp26 | BB_B16 | 12693 | cp32-1   |
| plasmid_cp26 | BB_B16 | 12732 | Not done |
| plasmid_cp26 | BB_B16 | 12750 | lp5      |
| plasmid_cp26 | BB_B16 | 13146 | lp5      |
| plasmid_cp26 | BB_B16 | 13469 | Not done |
| plasmid_cp26 | BB_B29 | 24850 | lp5      |
| plasmid_cp26 | BB_B29 | 25022 | lp5      |
| plasmid_cp26 | BB_B29 | 25102 | lp5      |
| plasmid_cp26 | BB_B29 | 25170 | lp5      |
| plasmid_cp26 | BB_B29 | 25452 | lp5      |
| plasmid_cp26 | BB_B29 | 25713 | Complete |
| plasmid_cp26 | BB_B29 | 25928 | lp5      |
| plasmid_cp26 | BB_B29 | 25931 | lp5      |
| plasmid_cp26 | BB_B29 | 25943 | lp5      |
| plasmid_cp26 | BB_B29 | 26025 | lp5      |
| plasmid_cp26 | BB_B29 | 26026 | lp5      |
| plasmid_lp25 | BB_E22 | 15049 | Complete |
| plasmid_lp25 | BB_E22 | 15167 | cp9      |
| plasmid_lp54 | BB_A04 | 2129  | lp28-1   |
| plasmid_lp54 | BB_A04 | 2796  | lp5      |

**Table S2. Fitness values of all genes identified by the Tn-seq in the carbohydrate screen<sup>a</sup>**

| Location   | Locus   | Gene        | GlcNAc                     |                      | Maltose              |         | Mannose              |         | Trehalose            |         |
|------------|---------|-------------|----------------------------|----------------------|----------------------|---------|----------------------|---------|----------------------|---------|
|            |         |             | Fitness Value <sup>b</sup> | p-value <sup>c</sup> | Fitness Value        | p-value | Fitness Value        | p-value | Fitness Value        | p-value |
| chromosome | BB_0001 |             | <b>0.955</b> ± 0.405       | 0.718                | <b>1.351</b> ± 0.615 | 0.484   | <b>0.533</b> ± 0.200 | 0.158   | <b>0.727</b> ± 0.369 | 0.302   |
| chromosome | BB_0002 |             | <b>1.151</b> ± 1.464       | 0.861                | <b>1.854</b> ± 2.673 | 0.000   | <b>0.978</b> ± 1.442 | 0.951   | <b>1.646</b> ± 2.241 | 0.538   |
| chromosome | BB_0017 |             | <b>0.674</b> ± 0.259       | 0.153                | <b>0.624</b> ± 0.374 | 0.424   | <b>0.930</b> ± 0.397 | 0.464   | <b>0.984</b> ± 0.476 | 0.306   |
| chromosome | BB_0021 | <i>queA</i> | <b>0.777</b> ± 0.290       | 0.269                | <b>1.135</b> ± 0.385 | 0.275   | <b>0.835</b> ± 0.314 | 0.319   | <b>0.945</b> ± 0.419 | 0.704   |
| chromosome | BB_0022 | <i>ruvB</i> | <b>0.934</b> ± 0.172       | 0.085                | <b>1.127</b> ± 0.350 | 0.440   | <b>0.722</b> ± 0.082 | 0.052   | <b>0.991</b> ± 0.193 | 0.864   |
| chromosome | BB_0023 | <i>ruvA</i> | <b>0.755</b> ± 0.424       | 0.248                | <b>0.999</b> ± 0.685 | 0.987   | <b>0.694</b> ± 0.374 | 0.199   | <b>0.838</b> ± 0.499 | 0.220   |
| chromosome | BB_0024 |             | <b>0.861</b> ± 0.157       | 0.087                | <b>1.114</b> ± 0.627 | 0.737   | <b>0.699</b> ± 0.109 | 0.066   | <b>0.937</b> ± 0.144 | 0.576   |
| chromosome | BB_0040 | <i>cheR</i> | <b>0.559</b> ± 0.223       | 0.175                | <b>0.334</b> ± 0.270 | 0.197   | <b>0.715</b> ± 0.352 | 0.136   | <b>0.821</b> ± 0.497 | 0.126   |
| chromosome | BB_0043 |             | <b>1.268</b> ± 0.454       | 0.463                | <b>2.000</b> ± 1.636 | 0.439   | <b>0.942</b> ± 0.312 | 0.699   | <b>0.924</b> ± 0.329 | 0.059   |
| chromosome | BB_0045 |             | <b>0.722</b> ± 0.349       | 0.502                | <b>0.901</b> ± 0.424 | 0.778   | <b>0.689</b> ± 0.430 | 0.257   | <b>1.022</b> ± 0.596 | 0.955   |
| chromosome | BB_0046 | <i>rnhB</i> | <b>0.519</b> ± 0.356       | 0.265                | <b>0.663</b> ± 0.368 | 0.397   | <b>0.577</b> ± 0.153 | 0.041   | <b>0.981</b> ± 0.291 | 0.073   |
| chromosome | BB_0050 |             | <b>0.220</b> ± 0.169       | 0.051                | <b>0.639</b> ± 0.610 | 0.148   | <b>0.817</b> ± 0.428 | 0.290   | <b>0.916</b> ± 0.466 | 0.543   |
| chromosome | BB_0051 |             | <b>0.331</b> ± 0.207       | 0.067                | <b>0.671</b> ± 0.638 | 0.298   | <b>1.210</b> ± 0.663 | 0.126   | <b>1.007</b> ± 0.401 | 0.978   |
| chromosome | BB_0053 | <i>ung</i>  | <b>0.439</b> ± 0.222       | 0.028                | <b>0.975</b> ± 0.599 | 0.886   | <b>0.725</b> ± 0.288 | 0.115   | <b>1.024</b> ± 0.601 | 0.873   |
| chromosome | BB_0071 |             | <b>1.005</b> ± 0.379       | 0.979                | <b>0.873</b> ± 0.521 | 0.708   | <b>0.551</b> ± 0.301 | 0.176   | <b>0.764</b> ± 0.264 | 0.251   |
| chromosome | BB_0085 |             | <b>0.609</b> ± 0.208       | 0.097                | <b>0.473</b> ± 0.396 | 0.311   | <b>0.723</b> ± 0.284 | 0.089   | <b>0.864</b> ± 0.386 | 0.069   |
| chromosome | BB_0086 |             | <b>0.419</b> ± 0.371       | 0.038                | <b>0.735</b> ± 0.731 | 0.066   | <b>0.739</b> ± 0.550 | 0.048   | <b>0.934</b> ± 0.690 | 0.494   |
| chromosome | BB_0098 |             | <b>1.152</b> ± 0.672       | 0.387                | <b>1.626</b> ± 0.979 | 0.169   | <b>0.867</b> ± 0.434 | 0.064   | <b>1.093</b> ± 0.534 | 0.184   |
| chromosome | BB_0102 |             | <b>0.751</b> ± 0.188       | 0.249                | <b>1.533</b> ± 0.542 | 0.179   | <b>0.783</b> ± 0.522 | 0.600   | <b>1.424</b> ± 0.368 | 0.171   |
| chromosome | BB_0110 |             | <b>0.332</b> ± 0.119       | 0.085                | <b>0.583</b> ± 0.364 | 0.359   | <b>0.877</b> ± 0.416 | 0.068   | <b>1.059</b> ± 0.493 | 0.570   |
| chromosome | BB_0116 |             | <b>0.785</b> ± 0.270       | 0.420                | <b>0.747</b> ± 0.507 | 0.605   | <b>0.814</b> ± 0.460 | 0.253   | <b>1.421</b> ± 0.920 | 0.328   |
| chromosome | BB_0117 |             | <b>1.037</b> ± 0.405       | 0.904                | <b>1.429</b> ± 0.561 | 0.330   | <b>0.653</b> ± 0.252 | 0.294   | <b>1.116</b> ± 0.415 | 0.551   |
| chromosome | BB_0134 |             | <b>0.634</b> ± 0.341       | 0.058                | <b>0.998</b> ± 1.287 | 0.998   | <b>0.422</b> ± 0.212 | 0.090   | <b>0.880</b> ± 0.434 | 0.734   |
| chromosome | BB_0138 |             | <b>2.434</b> ± 2.082       | 0.070                | <b>2.185</b> ± 2.776 | 0.342   | <b>0.722</b> ± 0.647 | 0.327   | <b>1.596</b> ± 1.694 | 0.333   |
| chromosome | BB_0140 |             | <b>1.003</b> ± 0.236       | 0.979                | <b>1.391</b> ± 0.566 | 0.295   | <b>0.717</b> ± 0.198 | 0.083   | <b>1.051</b> ± 0.246 | 0.713   |
| chromosome | BB_0141 |             | <b>1.076</b> ± 0.160       | 0.592                | <b>1.250</b> ± 0.199 | 0.161   | <b>0.800</b> ± 0.272 | 0.417   | <b>1.095</b> ± 0.529 | 0.776   |
| chromosome | BB_0142 |             | <b>1.121</b> ± 0.474       | 0.558                | <b>1.724</b> ± 1.319 | 0.394   | <b>0.694</b> ± 0.148 | 0.011   | <b>0.980</b> ± 0.271 | 0.774   |
| chromosome | BB_0143 |             | <b>1.624</b> ± 2.134       | 0.587                | <b>1.364</b> ± 1.373 | 0.202   | <b>1.233</b> ± 1.727 | 0.811   | <b>1.265</b> ± 1.185 | 0.670   |
| chromosome | BB_0155 |             | <b>0.393</b> ± 0.401       | 0.182                | <b>0.301</b> ± 0.274 | 0.180   | <b>0.662</b> ± 0.641 | 0.472   | <b>0.487</b> ± 0.341 | 0.324   |
| chromosome | BB_0156 |             | <b>1.022</b> ± 0.532       | 0.723                | <b>1.126</b> ± 0.421 | 0.550   | <b>0.911</b> ± 0.318 | 0.718   | <b>1.149</b> ± 0.484 | 0.517   |
| chromosome | BB_0157 |             | <b>0.315</b> ± 0.210       | 0.047                | <b>0.390</b> ± 0.197 | 0.137   | <b>0.439</b> ± 0.202 | 0.191   | <b>0.617</b> ± 0.346 | 0.090   |
| chromosome | BB_0158 |             | <b>0.918</b> ± 0.186       | 0.143                | <b>1.600</b> ± 0.963 | 0.348   | <b>0.827</b> ± 0.180 | 0.254   | <b>1.066</b> ± 0.269 | 0.466   |
| chromosome | BB_0159 |             | <b>0.797</b> ± 0.547       | 0.423                | <b>1.591</b> ± 1.725 | 0.579   | <b>0.622</b> ± 0.321 | 0.154   | <b>0.828</b> ± 0.509 | 0.401   |
| chromosome | BB_0161 |             | <b>0.761</b> ± 0.367       | 0.034                | <b>1.086</b> ± 0.563 | 0.249   | <b>0.821</b> ± 0.375 | 0.158   | <b>1.061</b> ± 0.625 | 0.616   |
| chromosome | BB_0163 |             | <b>2.437</b> ± 1.708       | 0.275                | <b>3.092</b> ± 2.326 | 0.258   | <b>0.941</b> ± 0.352 | 0.776   | <b>1.074</b> ± 0.625 | 0.852   |
| chromosome | BB_0164 |             | <b>0.736</b> ± 0.390       | 0.409                | <b>1.260</b> ± 0.413 | 0.446   | <b>0.876</b> ± 0.258 | 0.208   | <b>1.206</b> ± 0.459 | 0.417   |
| chromosome | BB_0165 |             | <b>0.809</b> ± 0.407       | 0.262                | <b>1.111</b> ± 0.785 | 0.762   | <b>0.598</b> ± 0.345 | 0.025   | <b>0.894</b> ± 0.482 | 0.253   |
| chromosome | BB_0166 | <i>malQ</i> | <b>0.937</b> ± 0.458       | 0.556                | <b>1.991</b> ± 1.386 | 0.257   | <b>0.817</b> ± 0.326 | 0.074   | <b>1.328</b> ± 0.392 | 0.136   |
| chromosome | BB_0167 |             | <b>1.147</b> ± 0.457       | 0.351                | <b>1.130</b> ± 0.418 | 0.612   | <b>0.854</b> ± 0.385 | 0.254   | <b>1.031</b> ± 0.453 | 0.694   |
| chromosome | BB_0194 |             | <b>0.712</b> ± 0.416       | 0.108                | <b>1.035</b> ± 0.253 | 0.672   | <b>0.579</b> ± 0.194 | 0.154   | <b>1.069</b> ± 0.422 | 0.823   |
| chromosome | BB_0202 |             | <b>0.514</b> ± 0.188       | 0.150                | <b>0.551</b> ± 0.466 | 0.426   | <b>0.843</b> ± 0.396 | 0.143   | <b>1.042</b> ± 0.545 | 0.242   |
| chromosome | BB_0203 | <i>hflK</i> | <b>0.870</b> ± 0.108       | 0.280                | <b>0.963</b> ± 0.219 | 0.715   | <b>0.749</b> ± 0.109 | 0.009   | <b>0.943</b> ± 0.207 | 0.569   |
| chromosome | BB_0204 | <i>hflC</i> | <b>0.781</b> ± 0.479       | 0.174                | <b>1.283</b> ± 0.639 | 0.197   | <b>0.721</b> ± 0.360 | 0.299   | <b>1.138</b> ± 0.579 | 0.463   |
| chromosome | BB_0208 |             | <b>1.122</b> ± 0.340       | 0.012                | <b>2.039</b> ± 1.728 | 0.341   | <b>0.733</b> ± 0.191 | 0.089   | <b>1.049</b> ± 0.256 | 0.551   |
| chromosome | BB_0211 |             | <b>1.250</b> ± 0.518       | 0.066                | <b>1.309</b> ± 0.902 | 0.397   | <b>0.883</b> ± 0.336 | 0.524   | <b>1.020</b> ± 0.328 | 0.905   |
| chromosome | BB_0223 |             | <b>0.232</b> ± 0.112       | 0.060                | <b>0.442</b> ± 0.384 | 0.310   | <b>0.748</b> ± 0.340 | 0.252   | <b>0.832</b> ± 0.461 | 0.018   |
| chromosome | BB_0224 |             | <b>0.267</b> ± 0.072       | 0.041                | <b>0.487</b> ± 0.402 | 0.281   | <b>0.782</b> ± 0.287 | 0.028   | <b>0.927</b> ± 0.368 | 0.407   |
| chromosome | BB_0228 |             | <b>1.622</b> ± 0.540       | 0.130                | <b>1.582</b> ± 0.660 | 0.317   | <b>0.739</b> ± 0.226 | 0.248   | <b>1.251</b> ± 0.652 | 0.513   |
| chromosome | BB_0235 | <i>ychF</i> | <b>1.293</b> ± 0.356       | 0.364                | <b>2.569</b> ± 2.446 | 0.375   | <b>1.229</b> ± 0.967 | 0.755   | <b>0.894</b> ± 0.519 | 0.580   |
| chromosome | BB_0241 | <i>glpK</i> | <b>0.609</b> ± 0.346       | 0.160                | <b>0.803</b> ± 0.396 | 0.409   | <b>0.793</b> ± 0.536 | 0.244   | <b>0.996</b> ± 0.617 | 0.967   |
| chromosome | BB_0242 |             | <b>0.596</b> ± 0.274       | 0.165                | <b>1.137</b> ± 0.659 | 0.050   | <b>0.645</b> ± 0.367 | 0.074   | <b>0.843</b> ± 0.510 | 0.222   |
| chromosome | BB_0243 |             | <b>0.430</b> ± 0.420       | 0.186                | <b>0.928</b> ± 1.015 | 0.261   | <b>0.630</b> ± 0.703 | 0.121   | <b>0.837</b> ± 0.921 | 0.100   |
| chromosome | BB_0247 | <i>rdgB</i> | <b>1.880</b> ± 2.287       | 0.606                | <b>1.845</b> ± 1.599 | 0.153   | <b>1.089</b> ± 0.905 | 0.874   | <b>0.668</b> ± 1.281 | 0.334   |
| chromosome | BB_0252 |             | <b>0.950</b> ± 0.368       | 0.679                | <b>1.483</b> ± 1.110 | 0.457   | <b>0.684</b> ± 0.157 | 0.127   | <b>0.953</b> ± 0.236 | 0.424   |
| chromosome | BB_0254 | <i>recJ</i> | <b>0.966</b> ± 0.671       | 0.771                | <b>1.383</b> ± 0.772 | 0.077   | <b>0.572</b> ± 0.512 | 0.419   | <b>0.791</b> ± 0.645 | 0.682   |
| chromosome | BB_0255 |             | <b>1.177</b> ± 0.856       | 0.424                | <b>1.815</b> ± 1.436 | 0.232   | <b>0.799</b> ± 0.342 | 0.482   | <b>1.200</b> ± 0.703 | 0.089   |
| chromosome | BB_0256 | <i>rpsU</i> | <b>0.860</b> ± 0.269       | 0.112                | <b>1.501</b> ± 1.179 | 0.500   | <b>0.714</b> ± 0.182 | 0.079   | <b>0.785</b> ± 0.181 | 0.102   |
| chromosome | BB_0261 |             | <b>0.450</b> ± 0.375       | 0.120                | <b>1.133</b> ± 1.077 | 0.859   | <b>0.682</b> ± 0.824 | 0.626   | <b>0.731</b> ± 0.658 | 0.660   |
| chromosome | BB_0262 |             | <b>1.185</b> ± 0.616       | 0.585                | <b>2.038</b> ± 1.056 | 0.193   | <b>0.661</b> ± 0.612 | 0.568   | <b>1.800</b> ± 0.943 | 0.124   |
| chromosome | BB_0264 |             | <b>0.747</b> ± 0.330       | 0.014                | <b>1.202</b> ± 0.675 | 0.475   | <b>0.751</b> ± 0.278 | 0.100   | <b>0.768</b> ± 0.247 | 0.222   |

|            |         |              |                                    |                            |                            |                            |
|------------|---------|--------------|------------------------------------|----------------------------|----------------------------|----------------------------|
| chromosome | BB_0266 |              | <b>1.147</b> ± 0.221 0.367         | <b>1.729</b> ± 0.509 0.121 | <b>0.801</b> ± 0.070 0.014 | <b>1.161</b> ± 0.237 0.371 |
| chromosome | BB_0267 |              | <b>0.352</b> ± 0.386 0.018         | <b>2.011</b> ± 3.150 0.572 | <b>0.754</b> ± 0.537 0.522 | <b>2.911</b> ± 3.798 0.407 |
| chromosome | BB_0295 | <i>hslU</i>  | <b>1.424</b> ± 0.730 0.394         | <b>1.341</b> ± 1.213 0.687 | <b>0.980</b> ± 0.448 0.923 | <b>0.878</b> ± 0.508 0.755 |
| chromosome | BB_0296 |              | <b>0.722</b> ± 0.637 0.196         | <b>1.928</b> ± 2.379 0.586 | <b>0.811</b> ± 0.841 0.786 | <b>0.784</b> ± 0.773 0.784 |
| chromosome | BB_0297 |              | <b>0.898</b> ± 0.231 0.622         | <b>1.312</b> ± 0.586 0.508 | <b>1.015</b> ± 0.275 0.926 | <b>1.137</b> ± 0.308 0.594 |
| chromosome | BB_0315 |              | <b>1.250</b> ± 0.974 0.646         | <b>1.989</b> ± 1.786 0.422 | <b>1.030</b> ± 0.619 0.951 | <b>0.760</b> ± 0.367 0.259 |
| chromosome | BB_0316 |              | <b>0.979</b> ± 1.249 0.982         | <b>0.663</b> ± 0.747 0.575 | <b>1.728</b> ± 1.009 0.233 | <b>0.705</b> ± 0.320 0.029 |
| chromosome | BB_0322 |              | <b>0.480</b> ± 0.364 0.216         | <b>0.537</b> ± 0.353 0.368 | <b>0.674</b> ± 0.494 0.427 | <b>1.548</b> ± 1.454 0.275 |
| chromosome | BB_0328 |              | <b>0.691</b> ± 0.541 0.348         | <b>0.996</b> ± 1.011 0.957 | <b>0.596</b> ± 0.484 0.251 | <b>0.885</b> ± 0.869 0.139 |
| chromosome | BB_0329 |              | <b>0.675</b> ± 0.285 0.062         | <b>1.143</b> ± 0.730 0.573 | <b>0.646</b> ± 0.252 0.083 | <b>0.830</b> ± 0.523 0.262 |
| chromosome | BB_0336 |              | <b>0.905</b> ± 0.274 0.395         | <b>1.161</b> ± 0.657 0.532 | <b>0.660</b> ± 0.195 0.080 | <b>0.912</b> ± 0.273 0.337 |
| chromosome | BB_0344 |              | <b>0.926</b> ± 1.430 0.916         | <b>1.620</b> ± 1.801 0.493 | <b>0.625</b> ± 0.549 0.157 | <b>0.689</b> ± 0.467 0.255 |
| chromosome | BB_0347 |              | <b>0.709</b> ± 0.097 0.031         | <b>1.306</b> ± 0.319 0.180 | <b>0.794</b> ± 0.102 0.102 | <b>1.190</b> ± 0.184 0.116 |
| chromosome | BB_0359 |              | <b>1.646</b> ± 0.126 0.012         | <b>1.983</b> ± 1.939 0.473 | <b>0.597</b> ± 0.152 0.015 | <b>0.986</b> ± 0.625 0.972 |
| chromosome | BB_0360 |              | <b>1.014</b> ± 0.172 0.850         | <b>1.180</b> ± 0.538 0.667 | <b>0.678</b> ± 0.233 0.031 | <b>0.996</b> ± 0.137 0.970 |
| chromosome | BB_0361 |              | <b>0.813</b> ± 0.427 0.657         | <b>1.895</b> ± 1.613 0.404 | <b>0.841</b> ± 0.370 0.660 | <b>1.334</b> ± 0.659 0.030 |
| chromosome | BB_0363 |              | <b>0.962</b> ± 0.303 0.057         | <b>1.548</b> ± 0.955 0.300 | <b>0.833</b> ± 0.218 0.111 | <b>1.076</b> ± 0.295 0.207 |
| chromosome | BB_0365 | <i>la7</i>   | <b>0.627</b> ± 0.296 0.108         | <b>0.586</b> ± 0.292 0.337 | <b>0.713</b> ± 0.301 0.229 | <b>0.912</b> ± 0.452 0.379 |
| chromosome | BB_0368 |              | <b>1.117</b> ± 1.479 0.865         | <b>0.761</b> ± 0.506 0.654 | <b>0.277</b> ± 0.278 0.177 | <b>0.815</b> ± 0.688 0.630 |
| chromosome | BB_0377 | <i>luxS</i>  | <b>0.917</b> ± 0.443 0.243         | <b>1.622</b> ± 1.483 0.393 | <b>0.676</b> ± 0.300 0.114 | <b>0.887</b> ± 0.412 0.252 |
| chromosome | BB_0378 |              | <b>0.922</b> ± 0.414 0.212         | <b>1.546</b> ± 1.473 0.473 | <b>0.648</b> ± 0.288 0.053 | <b>0.916</b> ± 0.470 0.338 |
| chromosome | BB_0384 | <i>bmpC</i>  | <b>0.766</b> ± 0.427 0.527         | <b>0.746</b> ± 0.408 0.533 | <b>0.773</b> ± 0.424 0.480 | <b>0.856</b> ± 0.519 0.627 |
| chromosome | BB_0400 |              | <b>0.765</b> ± 0.233 0.258         | <b>1.055</b> ± 0.290 0.834 | <b>0.754</b> ± 0.296 0.029 | <b>0.946</b> ± 0.329 0.358 |
| chromosome | BB_0404 |              | <b>0.796</b> ± 0.668 0.747         | <b>1.088</b> ± 0.744 0.757 | <b>0.796</b> ± 0.538 0.530 | <b>0.960</b> ± 0.670 0.872 |
| chromosome | BB_0405 |              | <b>0.891</b> ± 0.481 0.778         | <b>1.292</b> ± 0.885 0.652 | <b>0.615</b> ± 0.123 0.099 | <b>0.864</b> ± 0.232 0.464 |
| chromosome | BB_0406 |              | <b>0.857</b> ± 0.273 0.253         | <b>1.530</b> ± 1.016 0.382 | <b>0.773</b> ± 0.350 0.140 | <b>0.835</b> ± 0.504 0.478 |
| chromosome | BB_0407 | <i>manA</i>  | <b>1.853</b> ± 0.994 0.257         | <b>1.874</b> ± 0.434 0.069 | <b>0.002</b> ± 0.004 0.001 | <b>2.003</b> ± 0.320 0.038 |
| chromosome | BB_0408 | <i>fruA1</i> | <b>1.282</b> ± 0.486 0.085         | <b>1.150</b> ± 0.738 0.494 | <b>0.022</b> ± 0.015 0.041 | <b>0.769</b> ± 0.305 0.467 |
| chromosome | BB_0411 |              | <b>0.730</b> ± 0.197 0.019         | <b>1.190</b> ± 0.264 0.437 | <b>0.688</b> ± 0.243 0.039 | <b>0.901</b> ± 0.239 0.283 |
| chromosome | BB_0412 |              | <b>0.824</b> ± 0.289 0.122         | <b>1.374</b> ± 0.952 0.425 | <b>0.773</b> ± 0.244 0.183 | <b>1.008</b> ± 0.359 0.940 |
| chromosome | BB_0414 |              | <b>1.042</b> ± 0.945 0.959         | <b>1.230</b> ± 1.076 0.545 | <b>0.338</b> ± 0.476 0.423 | <b>0.703</b> ± 0.725 0.252 |
| chromosome | BB_0415 |              | <b>1.091</b> ± 0.293 0.283         | <b>1.205</b> ± 0.646 0.686 | <b>0.895</b> ± 0.234 0.147 | <b>0.915</b> ± 0.152 0.313 |
| chromosome | BB_0419 | <i>rrp1</i>  | <b>0.000<sup>a</sup></b> ± x 0.149 | <b>0.094</b> ± 0.178 0.129 | <b>0.399</b> ± 0.426 0.259 | <b>0.913</b> ± 1.159 0.568 |
| chromosome | BB_0420 | <i>hk1</i>   | <b>0.195</b> ± 0.190 0.037         | <b>0.592</b> ± 0.577 0.020 | <b>1.071</b> ± 0.571 0.540 | <b>0.924</b> ± 0.504 0.573 |
| chromosome | BB_0421 |              | <b>1.005</b> ± 0.545 0.990         | <b>0.863</b> ± 0.434 0.656 | <b>1.057</b> ± 0.758 0.926 | <b>1.024</b> ± 0.693 0.970 |
| chromosome | BB_0422 |              | <b>0.910</b> ± 0.400 0.241         | <b>1.493</b> ± 1.081 0.365 | <b>0.593</b> ± 0.182 0.059 | <b>0.911</b> ± 0.248 0.631 |
| chromosome | BB_0429 |              | <b>0.890</b> ± 0.202 0.485         | <b>1.373</b> ± 0.973 0.475 | <b>0.650</b> ± 0.151 0.100 | <b>0.852</b> ± 0.200 0.378 |
| chromosome | BB_0431 |              | <b>0.883</b> ± 0.496 0.734         | <b>1.968</b> ± 0.851 0.166 | <b>0.502</b> ± 0.328 0.105 | <b>1.095</b> ± 0.180 0.536 |
| chromosome | BB_0450 | <i>rpoN</i>  | <b>0.779</b> ± 0.408 0.166         | <b>0.926</b> ± 0.535 0.656 | <b>0.498</b> ± 0.145 0.107 | <b>0.773</b> ± 0.277 0.251 |
| chromosome | BB_0453 |              | <b>0.757</b> ± 0.235 0.349         | <b>1.125</b> ± 0.884 0.739 | <b>0.523</b> ± 0.260 0.008 | <b>0.822</b> ± 0.333 0.109 |
| chromosome | BB_0457 | <i>uvrC</i>  | <b>0.181</b> ± 0.224 0.219         | <b>1.636</b> ± 1.735 0.072 | <b>0.563</b> ± 0.679 0.486 | <b>1.154</b> ± 1.468 0.379 |
| chromosome | BB_0459 |              | <b>0.952</b> ± 0.955 0.836         | <b>1.043</b> ± 1.233 0.901 | <b>0.770</b> ± 0.572 0.628 | <b>0.742</b> ± 0.762 0.392 |
| chromosome | BB_0460 |              | <b>0.571</b> ± 0.326 0.106         | <b>0.872</b> ± 0.327 0.591 | <b>1.023</b> ± 0.358 0.920 | <b>0.950</b> ± 0.631 0.875 |
| chromosome | BB_0475 |              | <b>0.961</b> ± 0.520 0.912         | <b>1.226</b> ± 1.190 0.715 | <b>0.703</b> ± 0.397 0.250 | <b>0.768</b> ± 0.463 0.563 |
| chromosome | BB_0505 |              | <b>0.507</b> ± 0.266 0.040         | <b>0.727</b> ± 0.684 0.235 | <b>1.023</b> ± 0.618 0.794 | <b>0.921</b> ± 0.505 0.133 |
| chromosome | BB_0506 | <i>rrmJ</i>  | <b>0.655</b> ± 0.616 0.434         | <b>0.576</b> ± 0.670 0.439 | <b>0.803</b> ± 0.528 0.279 | <b>0.523</b> ± 0.434 0.134 |
| chromosome | BB_0516 |              | <b>1.053</b> ± 1.569 0.819         | <b>1.361</b> ± 1.287 0.570 | <b>0.412</b> ± 0.498 0.256 | <b>1.567</b> ± 1.700 0.373 |
| chromosome | BB_0524 |              | <b>2.251</b> ± 1.089 0.028         | <b>2.154</b> ± 2.271 0.388 | <b>1.327</b> ± 0.732 0.547 | <b>1.664</b> ± 1.033 0.160 |
| chromosome | BB_0525 |              | <b>1.205</b> ± 0.356 0.433         | <b>1.744</b> ± 1.032 0.391 | <b>1.083</b> ± 0.370 0.778 | <b>1.033</b> ± 0.461 0.818 |
| chromosome | BB_0528 |              | <b>0.757</b> ± 0.067 0.033         | <b>0.993</b> ± 0.159 0.939 | <b>0.804</b> ± 0.187 0.198 | <b>0.840</b> ± 0.211 0.307 |
| chromosome | BB_0530 |              | <b>0.691</b> ± 0.304 0.050         | <b>1.231</b> ± 0.648 0.480 | <b>0.894</b> ± 0.372 0.544 | <b>1.155</b> ± 0.337 0.081 |
| chromosome | BB_0531 |              | <b>0.736</b> ± 0.703 0.656         | <b>0.810</b> ± 0.779 0.715 | <b>0.769</b> ± 0.769 0.494 | <b>1.267</b> ± 0.765 0.647 |
| chromosome | BB_0532 |              | <b>1.010</b> ± 0.429 0.974         | <b>1.039</b> ± 0.461 0.898 | <b>0.829</b> ± 0.432 0.624 | <b>0.974</b> ± 0.746 0.879 |
| chromosome | BB_0536 |              | <b>1.109</b> ± 0.844 0.683         | <b>1.711</b> ± 1.728 0.182 | <b>0.718</b> ± 0.631 0.279 | <b>0.930</b> ± 0.873 0.446 |
| chromosome | BB_0537 |              | <b>0.865</b> ± 0.239 0.423         | <b>1.116</b> ± 0.463 0.416 | <b>0.556</b> ± 0.180 0.063 | <b>0.856</b> ± 0.266 0.330 |
| chromosome | BB_0542 |              | <b>0.948</b> ± 0.521 0.602         | <b>1.122</b> ± 0.787 0.528 | <b>0.756</b> ± 0.523 0.157 | <b>0.861</b> ± 0.853 0.645 |
| chromosome | BB_0553 |              | <b>1.053</b> ± 0.370 0.642         | <b>1.441</b> ± 0.857 0.368 | <b>0.750</b> ± 0.138 0.155 | <b>0.975</b> ± 0.214 0.736 |
| chromosome | BB_0554 |              | <b>0.818</b> ± 0.234 0.262         | <b>0.975</b> ± 0.433 0.814 | <b>0.659</b> ± 0.193 0.063 | <b>0.898</b> ± 0.287 0.109 |
| chromosome | BB_0555 |              | <b>0.690</b> ± 0.136 0.066         | <b>1.295</b> ± 0.684 0.556 | <b>0.795</b> ± 0.304 0.430 | <b>0.783</b> ± 0.157 0.115 |
| chromosome | BB_0556 |              | <b>0.869</b> ± 0.238 0.420         | <b>1.042</b> ± 0.621 0.856 | <b>0.624</b> ± 0.158 0.134 | <b>0.804</b> ± 0.275 0.010 |
| chromosome | BB_0563 |              | <b>1.173</b> ± 0.622 0.140         | <b>1.418</b> ± 1.138 0.414 | <b>0.714</b> ± 0.365 0.049 | <b>1.082</b> ± 0.781 0.811 |
| chromosome | BB_0565 |              | <b>1.031</b> ± 0.119 0.532         | <b>1.368</b> ± 0.656 0.448 | <b>0.717</b> ± 0.156 0.064 | <b>0.994</b> ± 0.313 0.977 |
| chromosome | BB_0566 |              | <b>1.095</b> ± 0.608 0.488         | <b>2.075</b> ± 1.736 0.210 | <b>0.675</b> ± 0.467 0.071 | <b>1.470</b> ± 1.114 0.181 |
| chromosome | BB_0567 |              | <b>0.791</b> ± 0.166 0.151         | <b>1.229</b> ± 0.638 0.430 | <b>0.656</b> ± 0.138 0.068 | <b>0.949</b> ± 0.258 0.147 |

|            |         |                |                      |       |                       |       |                      |       |                      |       |
|------------|---------|----------------|----------------------|-------|-----------------------|-------|----------------------|-------|----------------------|-------|
| chromosome | BB_0568 |                | <b>0.844</b> ± 0.195 | 0.073 | <b>1.322</b> ± 0.870  | 0.539 | <b>0.683</b> ± 0.103 | 0.024 | <b>0.926</b> ± 0.139 | 0.564 |
| chromosome | BB_0569 |                | <b>0.918</b> ± 0.428 | 0.499 | <b>1.549</b> ± 1.131  | 0.383 | <b>0.853</b> ± 0.437 | 0.161 | <b>1.045</b> ± 0.333 | 0.787 |
| chromosome | BB_0570 |                | <b>1.116</b> ± 0.449 | 0.728 | <b>1.477</b> ± 0.772  | 0.394 | <b>0.784</b> ± 0.308 | 0.304 | <b>1.145</b> ± 0.466 | 0.391 |
| chromosome | BB_0576 |                | <b>1.154</b> ± 0.398 | 0.339 | <b>1.569</b> ± 1.174  | 0.321 | <b>0.788</b> ± 0.404 | 0.195 | <b>1.102</b> ± 0.472 | 0.663 |
| chromosome | BB_0577 |                | <b>0.887</b> ± 0.308 | 0.058 | <b>1.505</b> ± 1.192  | 0.448 | <b>0.866</b> ± 0.256 | 0.502 | <b>0.923</b> ± 0.241 | 0.467 |
| chromosome | BB_0578 |                | <b>0.943</b> ± 0.284 | 0.284 | <b>1.397</b> ± 0.752  | 0.291 | <b>0.719</b> ± 0.210 | 0.101 | <b>1.124</b> ± 0.347 | 0.231 |
| chromosome | BB_0580 |                | <b>0.496</b> ± 0.425 | 0.199 | <b>0.399</b> ± 0.393  | 0.396 | <b>0.716</b> ± 0.662 | 0.201 | <b>0.923</b> ± 0.923 | 0.065 |
| chromosome | BB_0581 | <i>recG</i>    | <b>0.849</b> ± 0.214 | 0.379 | <b>1.384</b> ± 1.022  | 0.613 | <b>0.590</b> ± 0.188 | 0.166 | <b>0.947</b> ± 0.458 | 0.797 |
| chromosome | BB_0582 |                | <b>0.868</b> ± 0.221 | 0.517 | <b>0.949</b> ± 0.547  | 0.878 | <b>0.599</b> ± 0.153 | 0.006 | <b>1.035</b> ± 0.278 | 0.815 |
| chromosome | BB_0584 |                | <b>1.099</b> ± 0.653 | 0.654 | <b>1.500</b> ± 1.332  | 0.594 | <b>0.798</b> ± 0.828 | 0.446 | <b>1.260</b> ± 0.548 | 0.484 |
| chromosome | BB_0588 | <i>bgp</i>     | <b>0.775</b> ± 0.166 | 0.086 | <b>0.774</b> ± 0.369  | 0.317 | <b>0.626</b> ± 0.083 | 0.004 | <b>0.820</b> ± 0.129 | 0.169 |
| chromosome | BB_0591 |                | <b>1.096</b> ± 0.342 | 0.540 | <b>1.636</b> ± 0.967  | 0.316 | <b>0.652</b> ± 0.192 | 0.046 | <b>0.870</b> ± 0.353 | 0.337 |
| chromosome | BB_0597 |                | <b>1.107</b> ± 0.939 | 0.692 | <b>1.357</b> ± 0.789  | 0.136 | <b>1.246</b> ± 0.713 | 0.442 | <b>1.226</b> ± 0.845 | 0.138 |
| chromosome | BB_0605 |                | <b>1.131</b> ± 0.945 | 0.773 | <b>1.556</b> ± 1.622  | 0.528 | <b>0.645</b> ± 0.501 | 0.193 | <b>0.998</b> ± 0.698 | 0.994 |
| chromosome | BB_0607 | <i>pcrA</i>    | <b>0.910</b> ± 0.677 | 0.862 | <b>2.133</b> ± 2.080  | 0.151 | <b>0.850</b> ± 0.703 | 0.429 | <b>1.041</b> ± 0.878 | 0.840 |
| chromosome | BB_0608 |                | <b>1.202</b> ± 0.775 | 0.060 | <b>1.202</b> ± 0.888  | 0.721 | <b>0.542</b> ± 0.259 | 0.201 | <b>1.064</b> ± 0.520 | 0.815 |
| chromosome | BB_0616 |                | <b>1.415</b> ± 0.831 | 0.536 | <b>1.651</b> ± 1.103  | 0.440 | <b>0.855</b> ± 0.507 | 0.766 | <b>1.262</b> ± 1.027 | 0.724 |
| chromosome | BB_0617 |                | <b>0.792</b> ± 0.344 | 0.493 | <b>1.354</b> ± 1.289  | 0.648 | <b>0.359</b> ± 0.130 | 0.027 | <b>0.372</b> ± 0.086 | 0.044 |
| chromosome | BB_0618 | <i>cdd</i>     | <b>1.911</b> ± 1.401 | 0.082 | <b>1.670</b> ± 1.163  | 0.208 | <b>1.555</b> ± 1.222 | 0.224 | <b>0.928</b> ± 0.541 | 0.747 |
| chromosome | BB_0619 |                | <b>0.283</b> ± 0.157 | 0.150 | <b>0.543</b> ± 0.298  | 0.299 | <b>0.570</b> ± 0.370 | 0.207 | <b>0.743</b> ± 0.434 | 0.359 |
| chromosome | BB_0620 |                | <b>0.827</b> ± 0.352 | 0.148 | <b>1.517</b> ± 0.919  | 0.290 | <b>0.739</b> ± 0.286 | 0.202 | <b>1.037</b> ± 0.353 | 0.535 |
| chromosome | BB_0623 | <i>mfd</i>     | <b>1.280</b> ± 0.959 | 0.244 | <b>1.440</b> ± 1.617  | 0.461 | <b>0.817</b> ± 0.519 | 0.521 | <b>1.369</b> ± 0.844 | 0.410 |
| chromosome | BB_0626 | <i>rnmV</i>    | <b>0.845</b> ± 0.713 | 0.814 | <b>0.937</b> ± 1.404  | 0.890 | <b>0.570</b> ± 0.589 | 0.158 | <b>0.718</b> ± 0.658 | 0.338 |
| chromosome | BB_0629 |                | <b>0.965</b> ± 0.178 | 0.815 | <b>1.382</b> ± 0.834  | 0.511 | <b>0.602</b> ± 0.118 | 0.061 | <b>0.888</b> ± 0.101 | 0.263 |
| chromosome | BB_0630 | <i>pfkB</i>    | <b>1.389</b> ± 1.842 | 0.577 | <b>2.700</b> ± 3.386  | 0.270 | <b>0.509</b> ± 0.798 | 0.163 | <b>1.887</b> ± 1.964 | 0.167 |
| chromosome | BB_0631 |                | <b>1.357</b> ± 1.348 | 0.658 | <b>0.711</b> ± 0.537  | 0.344 | <b>0.711</b> ± 0.723 | 0.004 | <b>1.321</b> ± 0.952 | 0.291 |
| chromosome | BB_0637 |                | <b>1.077</b> ± 0.178 | 0.377 | <b>2.060</b> ± 1.391  | 0.303 | <b>0.789</b> ± 0.316 | 0.454 | <b>0.979</b> ± 0.333 | 0.937 |
| chromosome | BB_0638 |                | <b>0.853</b> ± 0.233 | 0.172 | <b>1.266</b> ± 0.389  | 0.449 | <b>0.777</b> ± 0.208 | 0.028 | <b>0.857</b> ± 0.178 | 0.209 |
| chromosome | BB_0645 |                | <b>1.166</b> ± 0.810 | 0.794 | <b>1.189</b> ± 1.055  | 0.822 | <b>1.050</b> ± 0.703 | 0.372 | <b>0.781</b> ± 0.691 | 0.685 |
| chromosome | BB_0656 |                | <b>0.784</b> ± 0.962 | 0.110 | <b>1.575</b> ± 1.215  | 0.311 | <b>0.730</b> ± 0.619 | 0.362 | <b>0.944</b> ± 0.851 | 0.922 |
| chromosome | BB_0666 |                | <b>1.088</b> ± 0.955 | 0.737 | <b>1.603</b> ± 1.250  | 0.402 | <b>0.619</b> ± 0.495 | 0.516 | <b>0.604</b> ± 0.489 | 0.479 |
| chromosome | BB_0670 |                | <b>0.729</b> ± 0.635 | 0.563 | <b>1.161</b> ± 1.000  | 0.825 | <b>0.361</b> ± 0.395 | 0.193 | <b>0.820</b> ± 0.952 | 0.184 |
| chromosome | BB_0671 |                | <b>0.709</b> ± 0.283 | 0.047 | <b>1.056</b> ± 0.704  | 0.838 | <b>0.703</b> ± 0.297 | 0.039 | <b>0.824</b> ± 0.430 | 0.364 |
| chromosome | BB_0674 |                | <b>0.923</b> ± 0.427 | 0.773 | <b>1.400</b> ± 0.714  | 0.450 | <b>0.495</b> ± 0.225 | 0.086 | <b>0.871</b> ± 0.233 | 0.216 |
| chromosome | BB_0675 |                | <b>0.846</b> ± 0.376 | 0.374 | <b>2.072</b> ± 2.531  | 0.509 | <b>0.626</b> ± 0.278 | 0.053 | <b>1.023</b> ± 0.591 | 0.935 |
| chromosome | BB_0680 |                | <b>1.047</b> ± 0.820 | 0.598 | <b>1.742</b> ± 1.846  | 0.359 | <b>0.659</b> ± 0.419 | 0.209 | <b>0.889</b> ± 0.593 | 0.376 |
| chromosome | BB_0681 |                | <b>0.747</b> ± 0.192 | 0.008 | <b>1.140</b> ± 0.403  | 0.369 | <b>0.712</b> ± 0.222 | 0.021 | <b>0.961</b> ± 0.261 | 0.300 |
| chromosome | BB_0707 |                | <b>0.760</b> ± 0.054 | 0.007 | <b>1.354</b> ± 0.480  | 0.322 | <b>0.474</b> ± 0.205 | 0.029 | <b>0.887</b> ± 0.462 | 0.690 |
| chromosome | BB_0722 |                | <b>1.193</b> ± 0.233 | 0.173 | <b>1.745</b> ± 1.198  | 0.373 | <b>0.866</b> ± 0.277 | 0.356 | <b>1.102</b> ± 0.151 | 0.081 |
| chromosome | BB_0723 |                | <b>0.716</b> ± 0.155 | 0.089 | <b>0.762</b> ± 0.677  | 0.516 | <b>1.022</b> ± 0.371 | 0.821 | <b>1.143</b> ± 0.281 | 0.044 |
| chromosome | BB_0726 |                | <b>2.424</b> ± 3.150 | 0.504 | <b>9.225</b> ± 13.320 | 0.382 | <b>2.320</b> ± 2.230 | 0.444 | <b>3.209</b> ± 2.033 | 0.088 |
| chromosome | BB_0739 |                | <b>1.426</b> ± 1.092 | 0.055 | <b>1.249</b> ± 1.303  | 0.566 | <b>0.434</b> ± 0.326 | 0.287 | <b>1.108</b> ± 0.738 | 0.701 |
| chromosome | BB_0740 |                | <b>0.842</b> ± 0.388 | 0.167 | <b>1.361</b> ± 1.020  | 0.589 | <b>0.698</b> ± 0.280 | 0.355 | <b>0.991</b> ± 0.383 | 0.902 |
| chromosome | BB_0743 |                | <b>0.645</b> ± 0.146 | 0.139 | <b>0.407</b> ± 0.317  | 0.119 | <b>0.472</b> ± 0.078 | 0.032 | <b>0.833</b> ± 0.249 | 0.359 |
| chromosome | BB_0744 | <i>p83/100</i> | <b>0.790</b> ± 0.565 | 0.539 | <b>1.316</b> ± 0.952  | 0.602 | <b>0.817</b> ± 0.248 | 0.411 | <b>1.742</b> ± 0.617 | 0.138 |
| chromosome | BB_0745 |                | <b>0.953</b> ± 0.371 | 0.571 | <b>1.335</b> ± 0.496  | 0.129 | <b>0.814</b> ± 0.179 | 0.142 | <b>0.911</b> ± 0.316 | 0.108 |
| chromosome | BB_0756 |                | <b>0.707</b> ± 0.298 | 0.367 | <b>1.253</b> ± 0.983  | 0.714 | <b>0.323</b> ± 0.152 | 0.058 | <b>0.957</b> ± 0.551 | 0.887 |
| chromosome | BB_0761 |                | <b>1.609</b> ± 2.096 | 0.508 | <b>0.990</b> ± 0.920  | 0.987 | <b>0.334</b> ± 0.206 | 0.178 | <b>0.408</b> ± 0.324 | 0.129 |
| chromosome | BB_0767 | <i>murG</i>    | <b>1.627</b> ± 1.140 | 0.413 | <b>1.807</b> ± 0.791  | 0.126 | <b>1.120</b> ± 0.423 | 0.365 | <b>1.743</b> ± 0.827 | 0.198 |
| chromosome | BB_0771 | <i>rpoS</i>    | <b>1.077</b> ± 0.974 | 0.385 | <b>1.624</b> ± 1.743  | 0.315 | <b>0.706</b> ± 0.549 | 0.228 | <b>1.024</b> ± 0.848 | 0.699 |
| chromosome | BB_0772 |                | <b>1.147</b> ± 0.358 | 0.194 | <b>1.688</b> ± 1.175  | 0.342 | <b>0.721</b> ± 0.212 | 0.035 | <b>0.986</b> ± 0.265 | 0.820 |
| chromosome | BB_0773 |                | <b>1.097</b> ± 1.031 | 0.236 | <b>2.058</b> ± 2.584  | 0.353 | <b>0.665</b> ± 0.494 | 0.338 | <b>1.031</b> ± 0.833 | 0.848 |
| chromosome | BB_0789 |                | <b>0.829</b> ± 0.757 | 0.810 | <b>0.978</b> ± 1.057  | 0.960 | <b>0.096</b> ± 0.122 | 0.229 | <b>0.409</b> ± 0.755 | 0.059 |
| chromosome | BB_0797 | <i>mutS</i>    | <b>1.005</b> ± 0.361 | 0.956 | <b>1.281</b> ± 0.709  | 0.245 | <b>0.751</b> ± 0.360 | 0.016 | <b>1.063</b> ± 0.507 | 0.477 |
| chromosome | BB_0803 | <i>truB</i>    | <b>0.925</b> ± 0.355 | 0.759 | <b>0.893</b> ± 0.704  | 0.811 | <b>0.988</b> ± 0.299 | 0.946 | <b>1.527</b> ± 0.413 | 0.202 |
| chromosome | BB_0811 |                | <b>1.594</b> ± 1.143 | 0.265 | <b>1.613</b> ± 1.101  | 0.061 | <b>0.744</b> ± 0.541 | 0.208 | <b>1.316</b> ± 1.214 | 0.440 |
| chromosome | BB_0814 | <i>panF</i>    | <b>1.527</b> ± 0.873 | 0.020 | <b>1.759</b> ± 1.241  | 0.382 | <b>1.141</b> ± 0.684 | 0.162 | <b>1.085</b> ± 0.774 | 0.474 |
| chromosome | BB_0815 |                | <b>1.089</b> ± 0.351 | 0.506 | <b>1.617</b> ± 1.249  | 0.388 | <b>0.940</b> ± 0.248 | 0.708 | <b>1.062</b> ± 0.512 | 0.740 |
| chromosome | BB_0823 |                | <b>0.860</b> ± 1.100 | 0.685 | <b>1.564</b> ± 1.359  | 0.594 | <b>0.894</b> ± 0.581 | 0.825 | <b>1.140</b> ± 1.443 | 0.857 |
| chromosome | BB_0824 |                | <b>0.891</b> ± 0.676 | 0.684 | <b>0.842</b> ± 0.346  | 0.543 | <b>0.780</b> ± 0.465 | 0.137 | <b>0.493</b> ± 0.355 | 0.038 |
| chromosome | BB_0825 |                | <b>0.449</b> ± 0.440 | 0.138 | <b>0.674</b> ± 0.735  | 0.243 | <b>0.280</b> ± 0.379 | 0.307 | <b>0.523</b> ± 0.390 | 0.310 |
| chromosome | BB_0826 |                | <b>0.884</b> ± 1.010 | 0.826 | <b>1.207</b> ± 1.429  | 0.794 | <b>0.440</b> ± 0.635 | 0.563 | <b>1.065</b> ± 1.290 | 0.952 |
| chromosome | BB_0829 |                | <b>0.667</b> ± 0.154 | 0.063 | <b>0.868</b> ± 0.292  | 0.645 | <b>0.717</b> ± 0.165 | 0.073 | <b>1.040</b> ± 0.364 | 0.546 |
| chromosome | BB_0830 |                | <b>0.746</b> ± 0.510 | 0.203 | <b>1.203</b> ± 1.279  | 0.605 | <b>0.486</b> ± 0.323 | 0.131 | <b>0.803</b> ± 0.746 | 0.180 |

|                |          |                 |                      |       |                      |       |                      |       |                      |       |
|----------------|----------|-----------------|----------------------|-------|----------------------|-------|----------------------|-------|----------------------|-------|
| chromosome     | BB_0831  |                 | <b>0.691</b> ± 0.452 | 0.509 | <b>0.971</b> ± 0.398 | 0.937 | <b>0.965</b> ± 0.347 | 0.107 | <b>1.275</b> ± 0.549 | 0.130 |
| chromosome     | BB_0836  | <i>uvrB</i>     | <b>0.284</b> ± 0.215 | 0.230 | <b>0.480</b> ± 0.430 | 0.337 | <b>0.548</b> ± 0.506 | 0.501 | <b>1.451</b> ± 0.956 | 0.306 |
| chromosome     | BB_0838  |                 | <b>1.101</b> ± 0.605 | 0.620 | <b>1.987</b> ± 1.696 | 0.266 | <b>0.858</b> ± 0.489 | 0.393 | <b>1.441</b> ± 0.913 | 0.466 |
| chromosome     | BB_0844  |                 | <b>1.142</b> ± 0.685 | 0.673 | <b>1.557</b> ± 1.071 | 0.404 | <b>0.966</b> ± 0.729 | 0.930 | <b>1.142</b> ± 0.882 | 0.783 |
| chromosome     | BB_0845a |                 | <b>1.245</b> ± 0.902 | 0.184 | <b>1.734</b> ± 1.691 | 0.335 | <b>0.807</b> ± 0.456 | 0.316 | <b>1.084</b> ± 0.671 | 0.395 |
| chromosome     | BB_0845b |                 | <b>0.895</b> ± 0.777 | 0.500 | <b>1.765</b> ± 1.591 | 0.302 | <b>0.684</b> ± 0.544 | 0.086 | <b>0.748</b> ± 0.717 | 0.200 |
| chromosome     | BB_0848a |                 | <b>0.853</b> ± 0.541 | 0.370 | <b>0.703</b> ± 0.528 | 0.573 | <b>1.153</b> ± 0.693 | 0.782 | <b>0.327</b> ± 0.317 | 0.118 |
| chromosome     | BB_0849b |                 | <b>1.153</b> ± 0.922 | 0.745 | <b>1.359</b> ± 1.317 | 0.631 | <b>0.789</b> ± 0.419 | 0.197 | <b>1.176</b> ± 0.621 | 0.523 |
| chromosome     | BB_0852  |                 | <b>1.117</b> ± 0.405 | 0.397 | <b>1.134</b> ± 0.430 | 0.345 | <b>0.737</b> ± 0.320 | 0.454 | <b>1.090</b> ± 0.260 | 0.549 |
| chromosome     | BB_0853  |                 | <b>0.896</b> ± 0.747 | 0.690 | <b>1.624</b> ± 1.330 | 0.228 | <b>0.982</b> ± 0.653 | 0.945 | <b>0.994</b> ± 0.746 | 0.949 |
| chromosome     | BB_r01   | <i>5S_rrlA</i>  | <b>0.027</b> ± 0.027 | 0.027 | <b>0.257</b> ± 0.424 | 0.188 | <b>0.587</b> ± 0.193 | 0.189 | <b>0.374</b> ± 0.165 | 0.062 |
| chromosome     | BB_r02   | <i>23S_rrlA</i> | <b>0.572</b> ± 0.192 | 0.043 | <b>0.717</b> ± 0.180 | 0.170 | <b>0.621</b> ± 0.238 | 0.003 | <b>0.779</b> ± 0.320 | 0.055 |
| chromosome     | BB_r03   | <i>5S_rrlB</i>  | <b>0.030</b> ± 0.025 | 0.042 | <b>0.278</b> ± 0.444 | 0.219 | <b>0.556</b> ± 0.238 | 0.240 | <b>0.388</b> ± 0.155 | 0.069 |
| chromosome     | BB_r04   | <i>23S_rrlB</i> | <b>0.568</b> ± 0.191 | 0.027 | <b>0.733</b> ± 0.177 | 0.135 | <b>0.622</b> ± 0.236 | 0.002 | <b>0.774</b> ± 0.311 | 0.061 |
| plasmid_cp26   | BB_B01   |                 | <b>0.324</b> ± 0.343 | 0.021 | <b>0.459</b> ± 0.446 | 0.010 | <b>0.890</b> ± 0.556 | 0.119 | <b>0.949</b> ± 0.677 | 0.548 |
| plasmid_cp26   | BB_B02   |                 | <b>1.653</b> ± 0.275 | 0.006 | <b>1.123</b> ± 0.164 | 0.129 | <b>0.928</b> ± 0.146 | 0.362 | <b>1.106</b> ± 0.213 | 0.320 |
| plasmid_cp26   | BB_B04   |                 | <b>0.742</b> ± 0.540 | 0.394 | <b>0.741</b> ± 0.252 | 0.059 | <b>0.715</b> ± 0.103 | 0.026 | <b>0.950</b> ± 0.125 | 0.491 |
| plasmid_cp26   | BB_B05   |                 | <b>0.954</b> ± 0.697 | 0.852 | <b>0.925</b> ± 0.293 | 0.743 | <b>0.921</b> ± 0.307 | 0.639 | <b>1.194</b> ± 0.374 | 0.253 |
| plasmid_cp26   | BB_B06   |                 | <b>0.643</b> ± 0.610 | 0.544 | <b>0.748</b> ± 0.689 | 0.687 | <b>1.030</b> ± 0.374 | 0.861 | <b>1.121</b> ± 0.450 | 0.046 |
| plasmid_cp26   | BB_B07   |                 | <b>1.557</b> ± 0.210 | 0.041 | <b>1.567</b> ± 0.829 | 0.358 | <b>0.853</b> ± 0.068 | 0.008 | <b>1.038</b> ± 0.067 | 0.020 |
| plasmid_cp26   | BB_B09   |                 | <b>1.214</b> ± 0.339 | 0.023 | <b>0.920</b> ± 0.317 | 0.297 | <b>0.750</b> ± 0.247 | 0.001 | <b>0.907</b> ± 0.212 | 0.196 |
| plasmid_cp26   | BB_B12   |                 | <b>1.139</b> ± 0.879 | 0.741 | <b>0.614</b> ± 0.495 | 0.530 | <b>0.630</b> ± 0.511 | 0.542 | <b>1.034</b> ± 0.882 | 0.951 |
| plasmid_cp26   | BB_B14   |                 | <b>1.525</b> ± 0.588 | 0.200 | <b>1.316</b> ± 0.610 | 0.396 | <b>0.889</b> ± 0.113 | 0.102 | <b>1.060</b> ± 0.219 | 0.452 |
| plasmid_cp26   | BB_B16   |                 | <b>0.142</b> ± 0.118 | 0.042 | <b>0.371</b> ± 0.366 | 0.021 | <b>0.961</b> ± 0.450 | 0.617 | <b>0.840</b> ± 0.351 | 0.469 |
| plasmid_cp26   | BB_B17   |                 | <b>2.139</b> ± 0.550 | 0.063 | <b>1.494</b> ± 0.660 | 0.386 | <b>0.863</b> ± 0.342 | 0.209 | <b>1.145</b> ± 0.243 | 0.351 |
| plasmid_cp26   | BB_B18   | <i>guaA</i>     | <b>1.996</b> ± 0.371 | 0.037 | <b>1.593</b> ± 0.892 | 0.406 | <b>0.850</b> ± 0.192 | 0.006 | <b>1.019</b> ± 0.160 | 0.646 |
| plasmid_cp26   | BB_B22   |                 | <b>1.849</b> ± 0.524 | 0.106 | <b>1.238</b> ± 0.446 | 0.514 | <b>0.886</b> ± 0.249 | 0.023 | <b>1.022</b> ± 0.241 | 0.662 |
| plasmid_cp26   | BB_B23   |                 | <b>0.830</b> ± 0.259 | 0.019 | <b>0.482</b> ± 0.318 | 0.216 | <b>0.803</b> ± 0.282 | 0.055 | <b>0.927</b> ± 0.290 | 0.154 |
| plasmid_cp26   | BB_B24   |                 | <b>1.454</b> ± 0.106 | 0.023 | <b>1.132</b> ± 0.298 | 0.556 | <b>0.800</b> ± 0.097 | 0.076 | <b>1.007</b> ± 0.184 | 0.963 |
| plasmid_cp26   | BB_B25   |                 | <b>1.367</b> ± 0.857 | 0.057 | <b>1.068</b> ± 0.567 | 0.689 | <b>0.818</b> ± 0.493 | 0.324 | <b>1.081</b> ± 0.685 | 0.480 |
| plasmid_cp26   | BB_B27   |                 | <b>1.723</b> ± 0.660 | 0.007 | <b>1.079</b> ± 0.441 | 0.341 | <b>0.913</b> ± 0.341 | 0.462 | <b>1.389</b> ± 0.557 | 0.164 |
| plasmid_cp26   | BB_B28   |                 | <b>1.465</b> ± 0.185 | 0.027 | <b>0.815</b> ± 0.392 | 0.449 | <b>0.847</b> ± 0.066 | 0.006 | <b>1.157</b> ± 0.171 | 0.200 |
| plasmid_cp26   | BB_B29   |                 | <b>0.067</b> ± 0.079 | 0.124 | <b>0.321</b> ± 0.447 | 0.063 | <b>3.089</b> ± 2.711 | 0.064 | <b>0.097</b> ± 0.085 | 0.136 |
| plasmid_cp32-1 | BB_P01   |                 | <b>2.055</b> ± 0.665 | 0.052 | <b>1.487</b> ± 1.018 | 0.424 | <b>0.983</b> ± 0.224 | 0.247 | <b>1.073</b> ± 0.303 | 0.393 |
| plasmid_cp32-1 | BB_P02   |                 | <b>1.837</b> ± 0.524 | 0.028 | <b>1.085</b> ± 0.409 | 0.556 | <b>1.042</b> ± 0.238 | 0.532 | <b>1.010</b> ± 0.236 | 0.936 |
| plasmid_cp32-1 | BB_P03   |                 | <b>1.962</b> ± 0.597 | 0.104 | <b>1.548</b> ± 0.738 | 0.325 | <b>1.036</b> ± 0.359 | 0.885 | <b>1.021</b> ± 0.137 | 0.864 |
| plasmid_cp32-1 | BB_P04   |                 | <b>1.459</b> ± 0.782 | 0.013 | <b>1.103</b> ± 0.593 | 0.243 | <b>1.048</b> ± 0.519 | 0.629 | <b>1.293</b> ± 0.736 | 0.051 |
| plasmid_cp32-1 | BB_P05   |                 | <b>2.443</b> ± 0.833 | 0.040 | <b>2.116</b> ± 1.774 | 0.337 | <b>1.067</b> ± 0.413 | 0.530 | <b>1.371</b> ± 0.430 | 0.041 |
| plasmid_cp32-1 | BB_P06   |                 | <b>2.249</b> ± 1.137 | 0.147 | <b>1.670</b> ± 1.491 | 0.469 | <b>0.799</b> ± 0.278 | 0.112 | <b>1.045</b> ± 0.275 | 0.696 |
| plasmid_cp32-1 | BB_P07   |                 | <b>1.516</b> ± 0.590 | 0.287 | <b>1.641</b> ± 1.591 | 0.555 | <b>0.814</b> ± 0.308 | 0.501 | <b>0.915</b> ± 0.395 | 0.810 |
| plasmid_cp32-1 | BB_P08   |                 | <b>0.562</b> ± 0.175 | 0.142 | <b>0.489</b> ± 0.302 | 0.205 | <b>1.149</b> ± 0.400 | 0.043 | <b>1.063</b> ± 0.434 | 0.457 |
| plasmid_cp32-1 | BB_P09   |                 | <b>2.759</b> ± 1.191 | 0.062 | <b>1.624</b> ± 1.133 | 0.338 | <b>0.967</b> ± 0.288 | 0.246 | <b>1.247</b> ± 0.420 | 0.064 |
| plasmid_cp32-1 | BB_P10   |                 | <b>1.306</b> ± 0.230 | 0.052 | <b>0.817</b> ± 0.163 | 0.189 | <b>0.864</b> ± 0.169 | 0.066 | <b>1.037</b> ± 0.128 | 0.273 |
| plasmid_cp32-1 | BB_P11   |                 | <b>1.974</b> ± 0.874 | 0.159 | <b>1.572</b> ± 1.127 | 0.428 | <b>1.088</b> ± 0.302 | 0.396 | <b>1.144</b> ± 0.232 | 0.181 |
| plasmid_cp32-1 | BB_P12   |                 | <b>2.153</b> ± 0.806 | 0.092 | <b>1.986</b> ± 1.862 | 0.425 | <b>0.993</b> ± 0.260 | 0.960 | <b>1.021</b> ± 0.270 | 0.741 |
| plasmid_cp32-1 | BB_P13   |                 | <b>2.432</b> ± 0.802 | 0.042 | <b>1.528</b> ± 0.995 | 0.355 | <b>1.152</b> ± 0.562 | 0.512 | <b>1.343</b> ± 0.487 | 0.291 |
| plasmid_cp32-1 | BB_P14   |                 | <b>1.858</b> ± 0.543 | 0.004 | <b>1.703</b> ± 1.173 | 0.272 | <b>1.221</b> ± 0.397 | 0.459 | <b>1.096</b> ± 0.428 | 0.107 |
| plasmid_cp32-1 | BB_P15   |                 | <b>2.023</b> ± 0.675 | 0.023 | <b>1.499</b> ± 1.171 | 0.437 | <b>0.891</b> ± 0.286 | 0.335 | <b>0.953</b> ± 0.311 | 0.001 |
| plasmid_cp32-1 | BB_P16   |                 | <b>1.785</b> ± 0.631 | 0.090 | <b>1.593</b> ± 1.299 | 0.461 | <b>0.914</b> ± 0.238 | 0.440 | <b>1.085</b> ± 0.314 | 0.590 |
| plasmid_cp32-1 | BB_P17   |                 | <b>1.972</b> ± 1.130 | 0.053 | <b>0.651</b> ± 0.304 | 0.374 | <b>0.955</b> ± 0.459 | 0.760 | <b>1.038</b> ± 0.544 | 0.562 |
| plasmid_cp32-1 | BB_P18   |                 | <b>2.176</b> ± 0.542 | 0.026 | <b>1.908</b> ± 1.501 | 0.369 | <b>1.048</b> ± 0.165 | 0.547 | <b>1.258</b> ± 0.168 | 0.081 |
| plasmid_cp32-1 | BB_P19   |                 | <b>3.577</b> ± 1.213 | 0.056 | <b>1.672</b> ± 1.459 | 0.500 | <b>0.998</b> ± 0.143 | 0.986 | <b>1.184</b> ± 0.330 | 0.411 |
| plasmid_cp32-1 | BB_P20   |                 | <b>1.495</b> ± 0.262 | 0.016 | <b>1.029</b> ± 0.277 | 0.791 | <b>0.914</b> ± 0.112 | 0.279 | <b>1.107</b> ± 0.130 | 0.133 |
| plasmid_cp32-1 | BB_P21   |                 | <b>1.993</b> ± 0.921 | 0.018 | <b>0.839</b> ± 0.442 | 0.279 | <b>0.875</b> ± 0.398 | 0.248 | <b>1.011</b> ± 0.475 | 0.951 |
| plasmid_cp32-1 | BB_P22   |                 | <b>1.708</b> ± 0.787 | 0.038 | <b>1.203</b> ± 0.866 | 0.521 | <b>0.914</b> ± 0.425 | 0.439 | <b>1.037</b> ± 0.452 | 0.719 |
| plasmid_cp32-1 | BB_P23   | <i>blyA</i>     | <b>1.100</b> ± 0.436 | 0.275 | <b>0.478</b> ± 0.346 | 0.292 | <b>0.915</b> ± 0.356 | 0.446 | <b>0.989</b> ± 0.422 | 0.819 |
| plasmid_cp32-1 | BB_P24   | <i>blyB</i>     | <b>2.668</b> ± 1.384 | 0.109 | <b>1.547</b> ± 0.965 | 0.459 | <b>0.977</b> ± 0.653 | 0.925 | <b>0.780</b> ± 0.280 | 0.448 |
| plasmid_cp32-1 | BB_P25   |                 | <b>2.174</b> ± 1.115 | 0.092 | <b>1.745</b> ± 1.470 | 0.365 | <b>1.015</b> ± 0.440 | 0.897 | <b>1.081</b> ± 0.413 | 0.425 |
| plasmid_cp32-1 | BB_P26   |                 | <b>2.010</b> ± 1.637 | 0.329 | <b>1.389</b> ± 0.957 | 0.481 | <b>0.757</b> ± 0.320 | 0.061 | <b>0.743</b> ± 0.523 | 0.370 |
| plasmid_cp32-1 | BB_P27   | <i>revA</i>     | <b>1.706</b> ± 0.707 | 0.200 | <b>1.311</b> ± 0.884 | 0.430 | <b>0.836</b> ± 0.359 | 0.498 | <b>0.852</b> ± 0.319 | 0.624 |
| plasmid_cp32-1 | BB_P28   | <i>mlpA</i>     | <b>1.438</b> ± 1.435 | 0.659 | <b>1.173</b> ± 1.183 | 0.790 | <b>0.491</b> ± 0.433 | 0.336 | <b>1.007</b> ± 0.911 | 0.992 |
| plasmid_cp32-1 | BB_P29   |                 | <b>2.774</b> ± 1.618 | 0.095 | <b>1.960</b> ± 1.719 | 0.321 | <b>1.064</b> ± 0.449 | 0.280 | <b>1.180</b> ± 0.509 | 0.080 |
| plasmid_cp32-1 | BB_P35   | <i>bppA</i>     | <b>2.522</b> ± 1.378 | 0.090 | <b>1.863</b> ± 1.576 | 0.330 | <b>0.941</b> ± 0.355 | 0.489 | <b>1.044</b> ± 0.398 | 0.383 |
| plasmid_cp32-1 | BB_P36   | <i>bppB</i>     | <b>2.416</b> ± 2.206 | 0.169 | <b>1.761</b> ± 1.954 | 0.359 | <b>0.978</b> ± 0.711 | 0.831 | <b>1.094</b> ± 0.877 | 0.172 |

|                |        |             |                      |       |                      |       |                      |       |                      |       |
|----------------|--------|-------------|----------------------|-------|----------------------|-------|----------------------|-------|----------------------|-------|
| plasmid_cp32-1 | BB_P37 | <i>bppC</i> | <b>2.556</b> ± 1.582 | 0.118 | <b>0.906</b> ± 0.448 | 0.804 | <b>0.680</b> ± 0.346 | 0.452 | <b>1.259</b> ± 0.726 | 0.056 |
| plasmid_cp32-1 | BB_P38 | <i>erpA</i> | <b>2.916</b> ± 1.169 | 0.085 | <b>1.894</b> ± 1.259 | 0.309 | <b>1.005</b> ± 0.172 | 0.948 | <b>1.081</b> ± 0.157 | 0.053 |
| plasmid_cp32-1 | BB_P39 | <i>erpB</i> | <b>2.056</b> ± 0.212 | 0.002 | <b>1.693</b> ± 0.861 | 0.266 | <b>1.153</b> ± 0.192 | 0.338 | <b>1.265</b> ± 0.296 | 0.321 |
| plasmid_cp32-1 | BB_P40 |             | <b>2.578</b> ± 1.437 | 0.165 | <b>2.036</b> ± 1.874 | 0.406 | <b>0.908</b> ± 0.340 | 0.693 | <b>1.490</b> ± 0.614 | 0.197 |
| plasmid_cp32-1 | BB_P41 |             | <b>2.831</b> ± 2.663 | 0.164 | <b>2.253</b> ± 3.038 | 0.416 | <b>0.873</b> ± 0.699 | 0.350 | <b>0.950</b> ± 0.746 | 0.509 |
| plasmid_cp32-1 | BB_P42 |             | <b>2.335</b> ± 0.735 | 0.029 | <b>1.674</b> ± 1.202 | 0.351 | <b>0.911</b> ± 0.206 | 0.479 | <b>1.032</b> ± 0.292 | 0.721 |
| plasmid_cp32-3 | BB_S01 |             | <b>2.178</b> ± 0.623 | 0.051 | <b>1.501</b> ± 0.987 | 0.426 | <b>1.085</b> ± 0.197 | 0.144 | <b>1.104</b> ± 0.242 | 0.269 |
| plasmid_cp32-3 | BB_S02 |             | <b>1.793</b> ± 0.442 | 0.071 | <b>1.037</b> ± 0.245 | 0.773 | <b>1.020</b> ± 0.113 | 0.670 | <b>1.006</b> ± 0.121 | 0.930 |
| plasmid_cp32-3 | BB_S03 |             | <b>1.987</b> ± 0.646 | 0.110 | <b>1.481</b> ± 0.783 | 0.395 | <b>1.026</b> ± 0.390 | 0.928 | <b>0.982</b> ± 0.155 | 0.902 |
| plasmid_cp32-3 | BB_S04 |             | <b>1.656</b> ± 0.735 | 0.091 | <b>1.556</b> ± 1.074 | 0.332 | <b>1.013</b> ± 0.340 | 0.534 | <b>1.278</b> ± 0.365 | 0.066 |
| plasmid_cp32-3 | BB_S05 |             | <b>2.336</b> ± 0.710 | 0.027 | <b>1.743</b> ± 1.379 | 0.387 | <b>1.053</b> ± 0.345 | 0.698 | <b>1.212</b> ± 0.344 | 0.392 |
| plasmid_cp32-3 | BB_S06 |             | <b>2.320</b> ± 1.162 | 0.142 | <b>1.669</b> ± 1.481 | 0.469 | <b>0.826</b> ± 0.286 | 0.222 | <b>1.051</b> ± 0.303 | 0.701 |
| plasmid_cp32-3 | BB_S07 |             | <b>1.413</b> ± 0.561 | 0.353 | <b>1.551</b> ± 1.613 | 0.588 | <b>0.717</b> ± 0.366 | 0.470 | <b>0.918</b> ± 0.480 | 0.844 |
| plasmid_cp32-3 | BB_S08 |             | <b>0.573</b> ± 0.177 | 0.148 | <b>0.501</b> ± 0.309 | 0.212 | <b>1.166</b> ± 0.389 | 0.043 | <b>1.075</b> ± 0.437 | 0.441 |
| plasmid_cp32-3 | BB_S09 |             | <b>2.707</b> ± 0.904 | 0.054 | <b>1.513</b> ± 0.910 | 0.382 | <b>0.968</b> ± 0.259 | 0.778 | <b>1.151</b> ± 0.319 | 0.354 |
| plasmid_cp32-3 | BB_S10 |             | <b>2.416</b> ± 0.908 | 0.049 | <b>1.366</b> ± 0.874 | 0.420 | <b>0.882</b> ± 0.279 | 0.240 | <b>1.073</b> ± 0.334 | 0.241 |
| plasmid_cp32-3 | BB_S11 |             | <b>2.190</b> ± 0.964 | 0.157 | <b>1.679</b> ± 1.112 | 0.384 | <b>1.133</b> ± 0.289 | 0.410 | <b>1.245</b> ± 0.145 | 0.013 |
| plasmid_cp32-3 | BB_S12 |             | <b>2.075</b> ± 0.680 | 0.085 | <b>1.953</b> ± 1.762 | 0.425 | <b>0.983</b> ± 0.236 | 0.910 | <b>0.987</b> ± 0.246 | 0.866 |
| plasmid_cp32-3 | BB_S13 |             | <b>2.389</b> ± 0.823 | 0.077 | <b>1.438</b> ± 0.879 | 0.437 | <b>1.081</b> ± 0.477 | 0.606 | <b>1.305</b> ± 0.408 | 0.142 |
| plasmid_cp32-3 | BB_S14 |             | <b>1.926</b> ± 0.632 | 0.008 | <b>1.672</b> ± 1.192 | 0.278 | <b>1.257</b> ± 0.462 | 0.419 | <b>1.114</b> ± 0.451 | 0.004 |
| plasmid_cp32-3 | BB_S15 |             | <b>2.537</b> ± 0.704 | 0.020 | <b>1.626</b> ± 1.146 | 0.367 | <b>1.015</b> ± 0.232 | 0.875 | <b>1.191</b> ± 0.280 | 0.005 |
| plasmid_cp32-3 | BB_S16 |             | <b>1.792</b> ± 0.843 | 0.081 | <b>1.602</b> ± 1.493 | 0.462 | <b>0.929</b> ± 0.325 | 0.561 | <b>0.991</b> ± 0.404 | 0.911 |
| plasmid_cp32-3 | BB_S17 |             | <b>1.999</b> ± 1.127 | 0.057 | <b>0.630</b> ± 0.291 | 0.350 | <b>0.984</b> ± 0.465 | 0.909 | <b>1.048</b> ± 0.539 | 0.426 |
| plasmid_cp32-3 | BB_S18 |             | <b>2.258</b> ± 0.644 | 0.029 | <b>1.968</b> ± 1.675 | 0.378 | <b>1.077</b> ± 0.232 | 0.630 | <b>1.240</b> ± 0.199 | 0.138 |
| plasmid_cp32-3 | BB_S19 |             | <b>2.875</b> ± 1.135 | 0.080 | <b>1.333</b> ± 1.141 | 0.641 | <b>0.771</b> ± 0.117 | 0.122 | <b>1.009</b> ± 0.244 | 0.945 |
| plasmid_cp32-3 | BB_S20 |             | <b>1.491</b> ± 0.258 | 0.021 | <b>1.016</b> ± 0.257 | 0.869 | <b>0.895</b> ± 0.111 | 0.241 | <b>1.098</b> ± 0.119 | 0.124 |
| plasmid_cp32-3 | BB_S21 |             | <b>2.031</b> ± 1.011 | 0.013 | <b>0.853</b> ± 0.454 | 0.397 | <b>0.914</b> ± 0.453 | 0.426 | <b>1.018</b> ± 0.537 | 0.935 |
| plasmid_cp32-3 | BB_S22 |             | <b>1.799</b> ± 0.724 | 0.019 | <b>1.361</b> ± 0.969 | 0.395 | <b>0.973</b> ± 0.421 | 0.757 | <b>1.130</b> ± 0.487 | 0.292 |
| plasmid_cp32-3 | BB_S23 | <i>blyA</i> | <b>1.121</b> ± 0.458 | 0.180 | <b>0.479</b> ± 0.344 | 0.289 | <b>0.918</b> ± 0.363 | 0.419 | <b>1.005</b> ± 0.441 | 0.881 |
| plasmid_cp32-3 | BB_S24 | <i>blyB</i> | <b>2.624</b> ± 1.435 | 0.121 | <b>1.556</b> ± 0.784 | 0.354 | <b>0.988</b> ± 0.614 | 0.958 | <b>0.872</b> ± 0.365 | 0.693 |
| plasmid_cp32-3 | BB_S25 |             | <b>2.139</b> ± 1.231 | 0.107 | <b>1.773</b> ± 1.557 | 0.352 | <b>0.940</b> ± 0.425 | 0.659 | <b>1.029</b> ± 0.431 | 0.685 |
| plasmid_cp32-3 | BB_S26 |             | <b>1.546</b> ± 0.521 | 0.257 | <b>1.087</b> ± 0.411 | 0.798 | <b>1.035</b> ± 0.291 | 0.837 | <b>1.186</b> ± 0.277 | 0.044 |
| plasmid_cp32-3 | BB_S27 |             | <b>0.880</b> ± 0.794 | 0.811 | <b>0.923</b> ± 0.776 | 0.792 | <b>0.619</b> ± 0.531 | 0.266 | <b>0.882</b> ± 0.947 | 0.867 |
| plasmid_cp32-3 | BB_S29 | <i>bdrF</i> | <b>2.222</b> ± 0.955 | 0.047 | <b>2.091</b> ± 1.492 | 0.201 | <b>1.101</b> ± 0.426 | 0.256 | <b>1.379</b> ± 0.627 | 0.208 |
| plasmid_cp32-3 | BB_S30 | <i>mlpC</i> | <b>1.976</b> ± 1.661 | 0.076 | <b>1.940</b> ± 1.939 | 0.178 | <b>1.233</b> ± 0.839 | 0.504 | <b>1.139</b> ± 0.809 | 0.660 |
| plasmid_cp32-3 | BB_S31 |             | <b>2.509</b> ± 0.980 | 0.040 | <b>1.646</b> ± 1.203 | 0.340 | <b>0.991</b> ± 0.300 | 0.920 | <b>1.139</b> ± 0.348 | 0.233 |
| plasmid_cp32-3 | BB_S38 | <i>bppA</i> | <b>2.439</b> ± 1.368 | 0.117 | <b>1.725</b> ± 1.399 | 0.356 | <b>0.941</b> ± 0.295 | 0.584 | <b>1.047</b> ± 0.383 | 0.036 |
| plasmid_cp32-3 | BB_S39 | <i>bppB</i> | <b>2.956</b> ± 1.752 | 0.191 | <b>2.625</b> ± 2.489 | 0.380 | <b>1.130</b> ± 0.655 | 0.773 | <b>1.223</b> ± 0.510 | 0.530 |
| plasmid_cp32-3 | BB_S40 | <i>bppC</i> | <b>3.393</b> ± 2.159 | 0.107 | <b>2.168</b> ± 2.277 | 0.381 | <b>0.933</b> ± 0.477 | 0.225 | <b>1.105</b> ± 0.483 | 0.268 |
| plasmid_cp32-3 | BB_S41 | <i>erpG</i> | <b>0.849</b> ± 0.632 | 0.319 | <b>0.804</b> ± 0.574 | 0.348 | <b>1.013</b> ± 0.793 | 0.783 | <b>1.029</b> ± 0.827 | 0.632 |
| plasmid_cp32-3 | BB_S44 |             | <b>1.246</b> ± 0.724 | 0.170 | <b>0.636</b> ± 0.368 | 0.434 | <b>1.159</b> ± 0.700 | 0.131 | <b>1.263</b> ± 0.892 | 0.076 |
| plasmid_cp32-3 | BB_S45 |             | <b>1.432</b> ± 0.475 | 0.107 | <b>1.027</b> ± 0.425 | 0.867 | <b>0.845</b> ± 0.230 | 0.094 | <b>0.938</b> ± 0.217 | 0.221 |
| plasmid_cp32-4 | BB_R01 |             | <b>2.099</b> ± 0.708 | 0.063 | <b>1.510</b> ± 1.005 | 0.405 | <b>1.025</b> ± 0.219 | 0.245 | <b>1.121</b> ± 0.301 | 0.233 |
| plasmid_cp32-4 | BB_R02 |             | <b>3.761</b> ± 2.327 | 0.047 | <b>2.510</b> ± 2.414 | 0.245 | <b>1.092</b> ± 0.754 | 0.822 | <b>1.200</b> ± 0.671 | 0.206 |
| plasmid_cp32-4 | BB_R03 |             | <b>1.222</b> ± 0.602 | 0.057 | <b>0.560</b> ± 0.417 | 0.405 | <b>1.061</b> ± 0.570 | 0.406 | <b>1.251</b> ± 0.662 | 0.046 |
| plasmid_cp32-4 | BB_R04 |             | <b>3.762</b> ± 2.600 | 0.157 | <b>0.880</b> ± 0.281 | 0.291 | <b>1.066</b> ± 0.428 | 0.318 | <b>1.196</b> ± 0.526 | 0.145 |
| plasmid_cp32-4 | BB_R05 |             | <b>3.627</b> ± 2.181 | 0.172 | <b>0.872</b> ± 1.013 | 0.786 | <b>2.359</b> ± 1.332 | 0.167 | <b>1.895</b> ± 1.521 | 0.346 |
| plasmid_cp32-4 | BB_R06 |             | <b>2.334</b> ± 0.462 | 0.016 | <b>1.306</b> ± 0.368 | 0.364 | <b>0.994</b> ± 0.308 | 0.955 | <b>1.020</b> ± 0.261 | 0.733 |
| plasmid_cp32-4 | BB_R07 |             | <b>1.617</b> ± 0.522 | 0.138 | <b>1.036</b> ± 0.666 | 0.900 | <b>0.565</b> ± 0.208 | 0.161 | <b>0.590</b> ± 0.206 | 0.113 |
| plasmid_cp32-4 | BB_R08 |             | <b>2.022</b> ± 0.560 | 0.037 | <b>1.152</b> ± 0.657 | 0.677 | <b>0.848</b> ± 0.213 | 0.066 | <b>1.043</b> ± 0.338 | 0.575 |
| plasmid_cp32-4 | BB_R09 |             | <b>2.734</b> ± 1.195 | 0.062 | <b>1.635</b> ± 1.127 | 0.321 | <b>0.967</b> ± 0.301 | 0.195 | <b>1.242</b> ± 0.411 | 0.041 |
| plasmid_cp32-4 | BB_R10 |             | <b>3.460</b> ± 0.716 | 0.029 | <b>1.874</b> ± 1.015 | 0.284 | <b>0.957</b> ± 0.072 | 0.358 | <b>1.091</b> ± 0.110 | 0.352 |
| plasmid_cp32-4 | BB_R11 |             | <b>3.009</b> ± 1.223 | 0.024 | <b>1.508</b> ± 1.348 | 0.464 | <b>1.076</b> ± 0.361 | 0.479 | <b>1.191</b> ± 0.418 | 0.157 |
| plasmid_cp32-4 | BB_R12 |             | <b>2.127</b> ± 0.642 | 0.072 | <b>1.961</b> ± 1.784 | 0.433 | <b>0.995</b> ± 0.167 | 0.966 | <b>0.950</b> ± 0.199 | 0.526 |
| plasmid_cp32-4 | BB_R13 |             | <b>3.107</b> ± 0.799 | 0.044 | <b>2.025</b> ± 1.176 | 0.249 | <b>1.402</b> ± 0.795 | 0.437 | <b>1.253</b> ± 0.300 | 0.185 |
| plasmid_cp32-4 | BB_R14 |             | <b>1.928</b> ± 0.590 | 0.005 | <b>1.670</b> ± 1.193 | 0.306 | <b>1.269</b> ± 0.436 | 0.347 | <b>1.134</b> ± 0.415 | 0.097 |
| plasmid_cp32-4 | BB_R15 |             | <b>2.017</b> ± 0.655 | 0.014 | <b>1.496</b> ± 1.185 | 0.438 | <b>0.892</b> ± 0.309 | 0.433 | <b>0.973</b> ± 0.335 | 0.055 |
| plasmid_cp32-4 | BB_R16 |             | <b>2.999</b> ± 1.075 | 0.021 | <b>1.631</b> ± 1.354 | 0.401 | <b>0.886</b> ± 0.292 | 0.222 | <b>1.095</b> ± 0.359 | 0.133 |
| plasmid_cp32-4 | BB_R17 |             | <b>2.099</b> ± 1.191 | 0.052 | <b>0.774</b> ± 0.346 | 0.270 | <b>0.923</b> ± 0.465 | 0.508 | <b>1.045</b> ± 0.544 | 0.273 |
| plasmid_cp32-4 | BB_R18 |             | <b>2.298</b> ± 0.730 | 0.024 | <b>2.019</b> ± 1.719 | 0.356 | <b>1.031</b> ± 0.270 | 0.786 | <b>1.216</b> ± 0.257 | 0.125 |
| plasmid_cp32-4 | BB_R19 |             | <b>2.257</b> ± 0.294 | 0.021 | <b>1.543</b> ± 0.505 | 0.229 | <b>1.056</b> ± 0.245 | 0.678 | <b>1.640</b> ± 0.511 | 0.149 |
| plasmid_cp32-4 | BB_R20 |             | <b>2.369</b> ± 1.153 | 0.060 | <b>0.900</b> ± 0.294 | 0.513 | <b>1.028</b> ± 0.463 | 0.805 | <b>1.061</b> ± 0.361 | 0.759 |
| plasmid_cp32-4 | BB_R21 |             | <b>2.465</b> ± 1.290 | 0.066 | <b>1.776</b> ± 1.679 | 0.395 | <b>0.869</b> ± 0.371 | 0.119 | <b>0.990</b> ± 0.413 | 0.906 |
| plasmid_cp32-4 | BB_R22 |             | <b>2.860</b> ± 0.664 | 0.034 | <b>1.449</b> ± 0.489 | 0.282 | <b>1.146</b> ± 0.184 | 0.148 | <b>1.102</b> ± 0.299 | 0.385 |

|                |        |             |                      |       |                      |       |                      |       |                      |       |
|----------------|--------|-------------|----------------------|-------|----------------------|-------|----------------------|-------|----------------------|-------|
| plasmid_cp32-4 | BB_R23 | <i>blyA</i> | <b>1.113</b> ± 0.439 | 0.288 | <b>0.466</b> ± 0.343 | 0.284 | <b>0.917</b> ± 0.383 | 0.422 | <b>0.993</b> ± 0.449 | 0.876 |
| plasmid_cp32-4 | BB_R24 | <i>blyB</i> | <b>2.679</b> ± 1.470 | 0.065 | <b>1.576</b> ± 1.000 | 0.406 | <b>0.991</b> ± 0.711 | 0.955 | <b>0.941</b> ± 0.455 | 0.884 |
| plasmid_cp32-4 | BB_R25 |             | <b>2.284</b> ± 1.132 | 0.083 | <b>1.629</b> ± 1.412 | 0.416 | <b>0.932</b> ± 0.388 | 0.587 | <b>1.043</b> ± 0.400 | 0.523 |
| plasmid_cp32-4 | BB_R26 |             | <b>1.023</b> ± 0.350 | 0.878 | <b>0.652</b> ± 0.422 | 0.262 | <b>1.027</b> ± 0.554 | 0.912 | <b>1.088</b> ± 0.399 | 0.003 |
| plasmid_cp32-4 | BB_R28 | <i>mlyD</i> | <b>2.920</b> ± 2.167 | 0.137 | <b>1.941</b> ± 2.087 | 0.391 | <b>0.957</b> ± 0.665 | 0.855 | <b>0.980</b> ± 0.680 | 0.805 |
| plasmid_cp32-4 | BB_R29 |             | <b>3.472</b> ± 1.171 | 0.027 | <b>1.807</b> ± 1.272 | 0.383 | <b>1.020</b> ± 0.251 | 0.893 | <b>1.134</b> ± 0.319 | 0.621 |
| plasmid_cp32-4 | BB_R32 |             | <b>2.056</b> ± 0.713 | 0.100 | <b>1.101</b> ± 0.301 | 0.430 | <b>0.885</b> ± 0.260 | 0.192 | <b>1.108</b> ± 0.323 | 0.350 |
| plasmid_cp32-4 | BB_R35 | <i>brdG</i> | <b>3.371</b> ± 0.544 | 0.014 | <b>1.641</b> ± 0.932 | 0.333 | <b>0.972</b> ± 0.098 | 0.164 | <b>1.209</b> ± 0.190 | 0.218 |
| plasmid_cp32-4 | BB_R36 | <i>bppA</i> | <b>1.800</b> ± 0.659 | 0.024 | <b>1.028</b> ± 0.536 | 0.903 | <b>0.705</b> ± 0.230 | 0.052 | <b>0.923</b> ± 0.267 | 0.575 |
| plasmid_cp32-4 | BB_R37 | <i>bppB</i> | <b>1.090</b> ± 0.262 | 0.372 | <b>0.935</b> ± 0.281 | 0.716 | <b>1.001</b> ± 0.248 | 0.993 | <b>1.129</b> ± 0.269 | 0.348 |
| plasmid_cp32-4 | BB_R38 | <i>bppC</i> | <b>3.378</b> ± 2.260 | 0.105 | <b>2.088</b> ± 2.246 | 0.384 | <b>0.991</b> ± 0.540 | 0.824 | <b>1.106</b> ± 0.528 | 0.351 |
| plasmid_cp32-4 | BB_R41 |             | <b>2.446</b> ± 1.107 | 0.039 | <b>1.105</b> ± 0.587 | 0.274 | <b>1.031</b> ± 0.484 | 0.254 | <b>0.997</b> ± 0.419 | 0.960 |
| plasmid_cp32-4 | BB_R42 | <i>erpY</i> | <b>2.939</b> ± 1.387 | 0.079 | <b>1.445</b> ± 0.964 | 0.353 | <b>0.847</b> ± 0.313 | 0.023 | <b>1.036</b> ± 0.546 | 0.811 |
| plasmid_cp32-4 | BB_R43 |             | <b>3.547</b> ± 0.460 | 0.003 | <b>1.733</b> ± 0.963 | 0.320 | <b>0.794</b> ± 0.560 | 0.641 | <b>1.360</b> ± 0.230 | 0.156 |
| plasmid_cp32-4 | BB_R44 |             | <b>2.895</b> ± 1.149 | 0.032 | <b>1.561</b> ± 1.068 | 0.311 | <b>0.891</b> ± 0.287 | 0.631 | <b>1.117</b> ± 0.472 | 0.258 |
| plasmid_cp32-4 | BB_R45 |             | <b>1.462</b> ± 0.555 | 0.062 | <b>0.822</b> ± 0.239 | 0.112 | <b>0.866</b> ± 0.296 | 0.077 | <b>0.982</b> ± 0.326 | 0.677 |
| plasmid_cp32-6 | BB_M01 |             | <b>2.067</b> ± 0.701 | 0.049 | <b>1.517</b> ± 1.076 | 0.411 | <b>0.998</b> ± 0.259 | 0.971 | <b>1.102</b> ± 0.324 | 0.208 |
| plasmid_cp32-6 | BB_M02 |             | <b>1.600</b> ± 0.444 | 0.106 | <b>1.166</b> ± 0.658 | 0.671 | <b>0.976</b> ± 0.114 | 0.166 | <b>0.938</b> ± 0.133 | 0.579 |
| plasmid_cp32-6 | BB_M03 |             | <b>1.380</b> ± 0.862 | 0.305 | <b>0.915</b> ± 0.301 | 0.484 | <b>0.792</b> ± 0.368 | 0.199 | <b>1.029</b> ± 0.316 | 0.798 |
| plasmid_cp32-6 | BB_M04 |             | <b>3.094</b> ± 0.725 | 0.023 | <b>1.635</b> ± 0.875 | 0.284 | <b>0.949</b> ± 0.433 | 0.878 | <b>1.056</b> ± 0.180 | 0.639 |
| plasmid_cp32-6 | BB_M05 |             | <b>1.306</b> ± 0.306 | 0.243 | <b>0.849</b> ± 0.572 | 0.718 | <b>1.537</b> ± 0.621 | 0.335 | <b>1.438</b> ± 0.769 | 0.452 |
| plasmid_cp32-6 | BB_M06 |             | <b>2.347</b> ± 0.510 | 0.015 | <b>1.299</b> ± 0.382 | 0.379 | <b>0.985</b> ± 0.333 | 0.865 | <b>1.006</b> ± 0.283 | 0.855 |
| plasmid_cp32-6 | BB_M07 |             | <b>1.718</b> ± 1.018 | 0.124 | <b>1.390</b> ± 1.428 | 0.562 | <b>0.899</b> ± 0.373 | 0.649 | <b>0.840</b> ± 0.349 | 0.419 |
| plasmid_cp32-6 | BB_M08 |             | <b>1.417</b> ± 0.445 | 0.121 | <b>1.171</b> ± 0.546 | 0.523 | <b>0.813</b> ± 0.155 | 0.068 | <b>0.970</b> ± 0.157 | 0.696 |
| plasmid_cp32-6 | BB_M10 |             | <b>1.218</b> ± 0.408 | 0.261 | <b>0.695</b> ± 0.491 | 0.269 | <b>0.975</b> ± 0.320 | 0.862 | <b>1.032</b> ± 0.263 | 0.608 |
| plasmid_cp32-6 | BB_M11 |             | <b>2.052</b> ± 0.880 | 0.104 | <b>1.902</b> ± 1.665 | 0.410 | <b>0.983</b> ± 0.224 | 0.830 | <b>1.157</b> ± 0.324 | 0.180 |
| plasmid_cp32-6 | BB_M12 |             | <b>2.097</b> ± 0.740 | 0.095 | <b>1.944</b> ± 1.765 | 0.428 | <b>0.992</b> ± 0.221 | 0.950 | <b>0.972</b> ± 0.231 | 0.700 |
| plasmid_cp32-6 | BB_M13 |             | <b>2.389</b> ± 0.863 | 0.059 | <b>1.465</b> ± 0.949 | 0.368 | <b>1.085</b> ± 0.543 | 0.703 | <b>1.288</b> ± 0.468 | 0.259 |
| plasmid_cp32-6 | BB_M14 |             | <b>2.532</b> ± 1.771 | 0.253 | <b>2.433</b> ± 2.678 | 0.477 | <b>1.924</b> ± 2.303 | 0.440 | <b>2.183</b> ± 1.826 | 0.361 |
| plasmid_cp32-6 | BB_M15 |             | <b>1.956</b> ± 0.623 | 0.019 | <b>1.477</b> ± 1.140 | 0.443 | <b>0.879</b> ± 0.299 | 0.225 | <b>0.977</b> ± 0.337 | 0.519 |
| plasmid_cp32-6 | BB_M16 |             | <b>1.759</b> ± 0.705 | 0.111 | <b>1.540</b> ± 1.285 | 0.483 | <b>0.929</b> ± 0.303 | 0.633 | <b>1.041</b> ± 0.333 | 0.769 |
| plasmid_cp32-6 | BB_M17 |             | <b>1.919</b> ± 1.166 | 0.044 | <b>0.695</b> ± 0.328 | 0.402 | <b>0.972</b> ± 0.524 | 0.847 | <b>1.053</b> ± 0.589 | 0.555 |
| plasmid_cp32-6 | BB_M18 |             | <b>2.278</b> ± 0.632 | 0.023 | <b>2.075</b> ± 1.636 | 0.327 | <b>1.157</b> ± 0.280 | 0.404 | <b>1.275</b> ± 0.227 | 0.082 |
| plasmid_cp32-6 | BB_M19 |             | <b>2.440</b> ± 0.554 | 0.026 | <b>1.710</b> ± 0.681 | 0.158 | <b>1.257</b> ± 0.535 | 0.557 | <b>1.665</b> ± 0.592 | 0.214 |
| plasmid_cp32-6 | BB_M20 |             | <b>1.964</b> ± 1.249 | 0.076 | <b>0.831</b> ± 0.365 | 0.556 | <b>1.098</b> ± 0.660 | 0.037 | <b>1.083</b> ± 0.619 | 0.048 |
| plasmid_cp32-6 | BB_M21 |             | <b>1.934</b> ± 0.957 | 0.023 | <b>0.723</b> ± 0.335 | 0.187 | <b>0.853</b> ± 0.414 | 0.214 | <b>0.986</b> ± 0.521 | 0.937 |
| plasmid_cp32-6 | BB_M22 |             | <b>1.801</b> ± 0.715 | 0.024 | <b>1.543</b> ± 1.205 | 0.380 | <b>0.969</b> ± 0.371 | 0.665 | <b>1.039</b> ± 0.453 | 0.507 |
| plasmid_cp32-6 | BB_M23 | <i>blyA</i> | <b>1.105</b> ± 0.433 | 0.208 | <b>0.473</b> ± 0.343 | 0.282 | <b>0.919</b> ± 0.359 | 0.411 | <b>0.993</b> ± 0.427 | 0.841 |
| plasmid_cp32-6 | BB_M24 | <i>blyB</i> | <b>1.730</b> ± 0.513 | 0.044 | <b>1.815</b> ± 1.293 | 0.341 | <b>0.738</b> ± 0.431 | 0.047 | <b>0.912</b> ± 0.290 | 0.733 |
| plasmid_cp32-6 | BB_M25 |             | <b>2.271</b> ± 1.185 | 0.095 | <b>1.684</b> ± 1.494 | 0.407 | <b>0.967</b> ± 0.400 | 0.764 | <b>1.070</b> ± 0.418 | 0.406 |
| plasmid_cp32-6 | BB_M26 |             | <b>1.680</b> ± 0.786 | 0.268 | <b>0.885</b> ± 0.255 | 0.324 | <b>0.782</b> ± 0.242 | 0.067 | <b>0.845</b> ± 0.245 | 0.491 |
| plasmid_cp32-6 | BB_M27 | <i>revA</i> | <b>1.520</b> ± 0.409 | 0.168 | <b>1.162</b> ± 0.522 | 0.618 | <b>0.736</b> ± 0.189 | 0.228 | <b>0.925</b> ± 0.227 | 0.736 |
| plasmid_cp32-6 | BB_M28 | <i>mlyP</i> | <b>1.457</b> ± 1.486 | 0.658 | <b>1.258</b> ± 1.249 | 0.697 | <b>0.537</b> ± 0.507 | 0.349 | <b>0.989</b> ± 0.914 | 0.988 |
| plasmid_cp32-6 | BB_M29 |             | <b>1.586</b> ± 0.792 | 0.110 | <b>1.297</b> ± 0.838 | 0.393 | <b>0.944</b> ± 0.315 | 0.695 | <b>1.084</b> ± 0.402 | 0.092 |
| plasmid_cp32-6 | BB_M34 | <i>bdrK</i> | <b>1.848</b> ± 1.465 | 0.261 | <b>1.569</b> ± 1.622 | 0.487 | <b>0.901</b> ± 0.431 | 0.721 | <b>1.046</b> ± 0.397 | 0.834 |
| plasmid_cp32-6 | BB_M35 | <i>bppA</i> | <b>1.780</b> ± 0.927 | 0.053 | <b>1.254</b> ± 0.831 | 0.348 | <b>1.023</b> ± 0.479 | 0.556 | <b>1.039</b> ± 0.551 | 0.331 |
| plasmid_cp32-6 | BB_M36 | <i>bppB</i> | <b>1.040</b> ± 0.286 | 0.707 | <b>0.921</b> ± 0.227 | 0.564 | <b>0.964</b> ± 0.253 | 0.675 | <b>1.093</b> ± 0.280 | 0.413 |
| plasmid_cp32-6 | BB_M37 | <i>bppC</i> | <b>1.900</b> ± 0.832 | 0.043 | <b>1.524</b> ± 1.197 | 0.392 | <b>0.840</b> ± 0.311 | 0.497 | <b>1.083</b> ± 0.431 | 0.578 |
| plasmid_cp32-6 | BB_M38 | <i>erpK</i> | <b>1.634</b> ± 0.580 | 0.092 | <b>1.542</b> ± 1.192 | 0.383 | <b>0.880</b> ± 0.259 | 0.621 | <b>1.093</b> ± 0.630 | 0.704 |
| plasmid_cp32-6 | BB_M39 |             | <b>1.745</b> ± 0.594 | 0.132 | <b>1.554</b> ± 1.687 | 0.588 | <b>0.684</b> ± 0.173 | 0.018 | <b>0.902</b> ± 0.397 | 0.717 |
| plasmid_cp32-6 | BB_M41 |             | <b>1.329</b> ± 0.776 | 0.054 | <b>0.748</b> ± 0.368 | 0.404 | <b>1.069</b> ± 0.596 | 0.454 | <b>1.168</b> ± 0.763 | 0.084 |
| plasmid_cp32-6 | BB_M42 |             | <b>1.641</b> ± 0.636 | 0.059 | <b>1.250</b> ± 0.666 | 0.359 | <b>1.028</b> ± 0.325 | 0.591 | <b>0.995</b> ± 0.382 | 0.912 |
| plasmid_cp32-7 | BB_O01 |             | <b>1.828</b> ± 0.456 | 0.052 | <b>1.360</b> ± 0.775 | 0.455 | <b>0.993</b> ± 0.180 | 0.867 | <b>1.068</b> ± 0.222 | 0.397 |
| plasmid_cp32-7 | BB_O02 |             | <b>1.796</b> ± 0.435 | 0.037 | <b>1.083</b> ± 0.286 | 0.437 | <b>1.015</b> ± 0.150 | 0.860 | <b>1.046</b> ± 0.162 | 0.649 |
| plasmid_cp32-7 | BB_O03 |             | <b>1.964</b> ± 0.631 | 0.106 | <b>1.513</b> ± 0.766 | 0.355 | <b>1.011</b> ± 0.370 | 0.967 | <b>0.973</b> ± 0.110 | 0.790 |
| plasmid_cp32-7 | BB_O04 |             | <b>1.856</b> ± 0.827 | 0.058 | <b>1.666</b> ± 1.364 | 0.371 | <b>1.024</b> ± 0.426 | 0.645 | <b>1.377</b> ± 0.430 | 0.055 |
| plasmid_cp32-7 | BB_O05 |             | <b>2.369</b> ± 0.950 | 0.039 | <b>2.027</b> ± 1.870 | 0.379 | <b>0.999</b> ± 0.438 | 0.996 | <b>1.255</b> ± 0.459 | 0.267 |
| plasmid_cp32-7 | BB_O06 |             | <b>2.273</b> ± 0.996 | 0.097 | <b>1.747</b> ± 1.210 | 0.325 | <b>0.828</b> ± 0.200 | 0.015 | <b>1.123</b> ± 0.410 | 0.562 |
| plasmid_cp32-7 | BB_O07 |             | <b>1.334</b> ± 0.560 | 0.467 | <b>1.337</b> ± 1.326 | 0.717 | <b>0.659</b> ± 0.401 | 0.471 | <b>0.791</b> ± 0.376 | 0.608 |
| plasmid_cp32-7 | BB_O08 |             | <b>1.392</b> ± 0.429 | 0.140 | <b>1.100</b> ± 0.485 | 0.665 | <b>0.785</b> ± 0.135 | 0.051 | <b>0.933</b> ± 0.140 | 0.404 |
| plasmid_cp32-7 | BB_O10 |             | <b>2.224</b> ± 0.621 | 0.007 | <b>1.847</b> ± 1.110 | 0.364 | <b>1.105</b> ± 0.521 | 0.711 | <b>1.124</b> ± 0.660 | 0.718 |
| plasmid_cp32-7 | BB_O11 |             | <b>2.002</b> ± 0.959 | 0.111 | <b>1.837</b> ± 1.701 | 0.426 | <b>0.963</b> ± 0.257 | 0.527 | <b>1.119</b> ± 0.425 | 0.316 |
| plasmid_cp32-7 | BB_O12 |             | <b>2.099</b> ± 0.459 | 0.039 | <b>2.051</b> ± 1.593 | 0.357 | <b>0.880</b> ± 0.153 | 0.316 | <b>0.927</b> ± 0.062 | 0.271 |
| plasmid_cp32-7 | BB_O13 |             | <b>1.913</b> ± 0.620 | 0.042 | <b>0.486</b> ± 0.423 | 0.172 | <b>0.451</b> ± 0.581 | 0.157 | <b>0.924</b> ± 0.995 | 0.922 |

|                |        |             |                      |       |                      |       |                      |       |                      |       |
|----------------|--------|-------------|----------------------|-------|----------------------|-------|----------------------|-------|----------------------|-------|
| plasmid_cp32-7 | BB_O15 |             | <b>2.445</b> ± 2.037 | 0.128 | <b>2.044</b> ± 1.697 | 0.135 | <b>0.775</b> ± 0.539 | 0.237 | <b>1.275</b> ± 0.733 | 0.536 |
| plasmid_cp32-7 | BB_O16 |             | <b>3.068</b> ± 3.409 | 0.239 | <b>2.235</b> ± 1.761 | 0.291 | <b>0.672</b> ± 0.517 | 0.419 | <b>1.500</b> ± 1.203 | 0.498 |
| plasmid_cp32-7 | BB_O17 |             | <b>2.074</b> ± 1.176 | 0.059 | <b>1.797</b> ± 1.712 | 0.365 | <b>0.921</b> ± 0.488 | 0.392 | <b>1.093</b> ± 0.562 | 0.346 |
| plasmid_cp32-7 | BB_O18 |             | <b>2.053</b> ± 0.629 | 0.054 | <b>1.938</b> ± 1.536 | 0.357 | <b>1.017</b> ± 0.267 | 0.935 | <b>1.085</b> ± 0.267 | 0.602 |
| plasmid_cp32-7 | BB_O19 |             | <b>2.546</b> ± 1.402 | 0.204 | <b>1.115</b> ± 0.861 | 0.849 | <b>0.762</b> ± 0.080 | 0.082 | <b>1.102</b> ± 0.196 | 0.556 |
| plasmid_cp32-7 | BB_O20 |             | <b>1.706</b> ± 0.409 | 0.002 | <b>1.248</b> ± 0.514 | 0.244 | <b>0.911</b> ± 0.290 | 0.085 | <b>0.992</b> ± 0.286 | 0.933 |
| plasmid_cp32-7 | BB_O21 |             | <b>2.125</b> ± 1.043 | 0.032 | <b>0.991</b> ± 0.675 | 0.964 | <b>0.929</b> ± 0.424 | 0.407 | <b>1.099</b> ± 0.513 | 0.670 |
| plasmid_cp32-7 | BB_O22 |             | <b>1.691</b> ± 0.770 | 0.030 | <b>1.207</b> ± 0.883 | 0.516 | <b>0.912</b> ± 0.432 | 0.351 | <b>1.047</b> ± 0.476 | 0.727 |
| plasmid_cp32-7 | BB_O23 | <i>blyA</i> | <b>1.111</b> ± 0.438 | 0.260 | <b>0.484</b> ± 0.348 | 0.294 | <b>0.935</b> ± 0.357 | 0.546 | <b>0.999</b> ± 0.434 | 0.971 |
| plasmid_cp32-7 | BB_O24 | <i>blyB</i> | <b>3.000</b> ± 1.993 | 0.121 | <b>2.530</b> ± 3.170 | 0.497 | <b>0.968</b> ± 0.994 | 0.967 | <b>0.765</b> ± 0.639 | 0.672 |
| plasmid_cp32-7 | BB_O25 |             | <b>2.115</b> ± 1.074 | 0.117 | <b>1.759</b> ± 1.493 | 0.389 | <b>0.980</b> ± 0.428 | 0.873 | <b>0.998</b> ± 0.248 | 0.979 |
| plasmid_cp32-7 | BB_O26 |             | <b>1.430</b> ± 0.569 | 0.385 | <b>1.103</b> ± 0.447 | 0.783 | <b>0.948</b> ± 0.314 | 0.800 | <b>1.170</b> ± 0.252 | 0.043 |
| plasmid_cp32-7 | BB_O27 | <i>bdrN</i> | <b>2.190</b> ± 0.966 | 0.186 | <b>1.722</b> ± 1.072 | 0.376 | <b>0.841</b> ± 0.200 | 0.306 | <b>1.283</b> ± 0.549 | 0.552 |
| plasmid_cp32-7 | BB_O29 |             | <b>2.220</b> ± 1.015 | 0.058 | <b>1.683</b> ± 1.310 | 0.338 | <b>0.993</b> ± 0.382 | 0.900 | <b>1.089</b> ± 0.401 | 0.098 |
| plasmid_cp32-7 | BB_O34 | <i>bdrM</i> | <b>1.876</b> ± 0.525 | 0.045 | <b>1.567</b> ± 0.911 | 0.401 | <b>0.920</b> ± 0.273 | 0.701 | <b>0.886</b> ± 0.383 | 0.713 |
| plasmid_cp32-7 | BB_O36 | <i>bppA</i> | <b>2.344</b> ± 1.174 | 0.087 | <b>1.749</b> ± 1.362 | 0.331 | <b>0.916</b> ± 0.296 | 0.384 | <b>1.077</b> ± 0.381 | 0.109 |
| plasmid_cp32-7 | BB_O37 | <i>bppB</i> | <b>2.465</b> ± 0.996 | 0.089 | <b>1.454</b> ± 1.035 | 0.470 | <b>1.276</b> ± 0.471 | 0.299 | <b>1.230</b> ± 0.434 | 0.334 |
| plasmid_cp32-7 | BB_O38 | <i>bppC</i> | <b>1.881</b> ± 0.902 | 0.034 | <b>1.572</b> ± 1.308 | 0.369 | <b>0.867</b> ± 0.344 | 0.508 | <b>1.143</b> ± 0.516 | 0.374 |
| plasmid_cp32-7 | BB_O39 | <i>erpL</i> | <b>0.699</b> ± 0.875 | 0.312 | <b>2.067</b> ± 3.184 | 0.545 | <b>1.242</b> ± 1.277 | 0.610 | <b>0.747</b> ± 0.868 | 0.265 |
| plasmid_cp32-7 | BB_O40 | <i>erpM</i> | <b>1.590</b> ± 0.408 | 0.111 | <b>1.656</b> ± 1.499 | 0.526 | <b>0.826</b> ± 0.244 | 0.088 | <b>0.744</b> ± 0.228 | 0.357 |
| plasmid_cp32-7 | BB_O41 |             | <b>2.063</b> ± 1.139 | 0.088 | <b>2.102</b> ± 1.568 | 0.208 | <b>0.801</b> ± 0.304 | 0.389 | <b>1.359</b> ± 0.528 | 0.329 |
| plasmid_cp32-7 | BB_O42 |             | <b>1.929</b> ± 0.642 | 0.094 | <b>1.811</b> ± 1.415 | 0.399 | <b>0.844</b> ± 0.286 | 0.300 | <b>1.052</b> ± 0.365 | 0.804 |
| plasmid_cp32-7 | BB_O43 |             | <b>1.487</b> ± 0.931 | 0.144 | <b>0.988</b> ± 0.658 | 0.919 | <b>0.867</b> ± 0.400 | 0.327 | <b>0.969</b> ± 0.487 | 0.583 |
| plasmid_cp32-7 | BB_O44 |             | <b>1.682</b> ± 1.084 | 0.099 | <b>1.341</b> ± 0.982 | 0.273 | <b>0.902</b> ± 0.447 | 0.516 | <b>0.969</b> ± 0.498 | 0.786 |
| plasmid_cp32-8 | BB_L01 |             | <b>2.069</b> ± 0.712 | 0.054 | <b>1.507</b> ± 1.052 | 0.411 | <b>0.977</b> ± 0.236 | 0.531 | <b>1.079</b> ± 0.319 | 0.301 |
| plasmid_cp32-8 | BB_L02 |             | <b>1.840</b> ± 0.576 | 0.036 | <b>1.085</b> ± 0.467 | 0.647 | <b>1.014</b> ± 0.245 | 0.723 | <b>0.991</b> ± 0.263 | 0.956 |
| plasmid_cp32-8 | BB_L03 |             | <b>1.940</b> ± 0.631 | 0.111 | <b>1.496</b> ± 0.781 | 0.379 | <b>0.972</b> ± 0.378 | 0.916 | <b>0.940</b> ± 0.141 | 0.648 |
| plasmid_cp32-8 | BB_L04 |             | <b>1.464</b> ± 0.777 | 0.005 | <b>1.101</b> ± 0.596 | 0.337 | <b>1.098</b> ± 0.567 | 0.329 | <b>1.274</b> ± 0.738 | 0.052 |
| plasmid_cp32-8 | BB_L05 |             | <b>2.482</b> ± 1.004 | 0.051 | <b>2.146</b> ± 1.818 | 0.324 | <b>1.025</b> ± 0.420 | 0.799 | <b>1.352</b> ± 0.413 | 0.013 |
| plasmid_cp32-8 | BB_L06 |             | <b>2.310</b> ± 1.155 | 0.136 | <b>1.687</b> ± 1.518 | 0.462 | <b>0.850</b> ± 0.298 | 0.270 | <b>1.103</b> ± 0.333 | 0.515 |
| plasmid_cp32-8 | BB_L07 |             | <b>1.307</b> ± 0.604 | 0.504 | <b>1.477</b> ± 1.476 | 0.621 | <b>0.660</b> ± 0.279 | 0.313 | <b>0.740</b> ± 0.307 | 0.447 |
| plasmid_cp32-8 | BB_L08 |             | <b>0.566</b> ± 0.171 | 0.142 | <b>0.492</b> ± 0.310 | 0.210 | <b>1.152</b> ± 0.399 | 0.054 | <b>1.071</b> ± 0.428 | 0.406 |
| plasmid_cp32-8 | BB_L09 |             | <b>2.818</b> ± 1.182 | 0.059 | <b>1.633</b> ± 1.169 | 0.356 | <b>0.994</b> ± 0.281 | 0.776 | <b>1.244</b> ± 0.419 | 0.066 |
| plasmid_cp32-8 | BB_L10 |             | <b>1.327</b> ± 0.254 | 0.027 | <b>0.829</b> ± 0.171 | 0.203 | <b>0.869</b> ± 0.170 | 0.057 | <b>1.050</b> ± 0.158 | 0.252 |
| plasmid_cp32-8 | BB_L11 |             | <b>2.134</b> ± 0.794 | 0.099 | <b>1.649</b> ± 1.092 | 0.372 | <b>1.202</b> ± 0.416 | 0.409 | <b>1.171</b> ± 0.229 | 0.188 |
| plasmid_cp32-8 | BB_L12 |             | <b>2.156</b> ± 0.738 | 0.080 | <b>2.008</b> ± 1.835 | 0.413 | <b>0.993</b> ± 0.248 | 0.959 | <b>1.014</b> ± 0.282 | 0.850 |
| plasmid_cp32-8 | BB_L13 |             | <b>2.344</b> ± 0.667 | 0.034 | <b>1.437</b> ± 0.952 | 0.421 | <b>1.049</b> ± 0.494 | 0.834 | <b>1.188</b> ± 0.345 | 0.423 |
| plasmid_cp32-8 | BB_L14 |             | <b>1.948</b> ± 0.617 | 0.005 | <b>1.756</b> ± 1.294 | 0.301 | <b>1.365</b> ± 0.476 | 0.272 | <b>1.214</b> ± 0.436 | 0.016 |
| plasmid_cp32-8 | BB_L15 |             | <b>1.984</b> ± 0.669 | 0.025 | <b>1.479</b> ± 1.155 | 0.445 | <b>0.899</b> ± 0.295 | 0.382 | <b>0.946</b> ± 0.300 | 0.079 |
| plasmid_cp32-8 | BB_L16 |             | <b>1.768</b> ± 0.662 | 0.083 | <b>1.579</b> ± 1.271 | 0.447 | <b>0.869</b> ± 0.236 | 0.372 | <b>1.065</b> ± 0.327 | 0.686 |
| plasmid_cp32-8 | BB_L17 |             | <b>1.963</b> ± 1.119 | 0.057 | <b>0.653</b> ± 0.294 | 0.362 | <b>0.960</b> ± 0.463 | 0.759 | <b>1.045</b> ± 0.536 | 0.445 |
| plasmid_cp32-8 | BB_L18 |             | <b>2.139</b> ± 0.618 | 0.025 | <b>1.890</b> ± 1.544 | 0.375 | <b>1.032</b> ± 0.221 | 0.830 | <b>1.236</b> ± 0.221 | 0.144 |
| plasmid_cp32-8 | BB_L19 |             | <b>2.660</b> ± 1.503 | 0.113 | <b>1.258</b> ± 0.752 | 0.491 | <b>0.825</b> ± 0.407 | 0.667 | <b>0.998</b> ± 0.420 | 0.992 |
| plasmid_cp32-8 | BB_L20 |             | <b>1.491</b> ± 0.235 | 0.010 | <b>0.995</b> ± 0.240 | 0.957 | <b>0.891</b> ± 0.105 | 0.212 | <b>1.106</b> ± 0.121 | 0.169 |
| plasmid_cp32-8 | BB_L21 |             | <b>2.029</b> ± 0.959 | 0.014 | <b>0.877</b> ± 0.481 | 0.329 | <b>0.921</b> ± 0.414 | 0.455 | <b>1.036</b> ± 0.517 | 0.846 |
| plasmid_cp32-8 | BB_L22 |             | <b>1.716</b> ± 0.768 | 0.025 | <b>1.205</b> ± 0.893 | 0.530 | <b>0.939</b> ± 0.434 | 0.417 | <b>1.046</b> ± 0.458 | 0.661 |
| plasmid_cp32-8 | BB_L23 | <i>blyA</i> | <b>1.127</b> ± 0.469 | 0.177 | <b>0.476</b> ± 0.350 | 0.294 | <b>0.908</b> ± 0.367 | 0.409 | <b>0.985</b> ± 0.442 | 0.711 |
| plasmid_cp32-8 | BB_L24 | <i>blyB</i> | <b>2.620</b> ± 1.256 | 0.089 | <b>1.580</b> ± 0.872 | 0.408 | <b>0.998</b> ± 0.617 | 0.993 | <b>0.913</b> ± 0.293 | 0.733 |
| plasmid_cp32-8 | BB_L25 |             | <b>2.374</b> ± 1.313 | 0.085 | <b>1.678</b> ± 1.438 | 0.363 | <b>0.979</b> ± 0.462 | 0.896 | <b>1.013</b> ± 0.413 | 0.895 |
| plasmid_cp32-8 | BB_L26 |             | <b>1.485</b> ± 0.449 | 0.257 | <b>1.002</b> ± 0.393 | 0.995 | <b>1.006</b> ± 0.353 | 0.978 | <b>1.191</b> ± 0.347 | 0.036 |
| plasmid_cp32-8 | BB_L29 |             | <b>2.769</b> ± 1.467 | 0.075 | <b>1.944</b> ± 1.588 | 0.297 | <b>1.060</b> ± 0.437 | 0.311 | <b>1.175</b> ± 0.475 | 0.021 |
| plasmid_cp32-8 | BB_L35 | <i>bdrO</i> | <b>3.020</b> ± 1.977 | 0.134 | <b>2.049</b> ± 2.060 | 0.386 | <b>0.781</b> ± 0.328 | 0.105 | <b>1.129</b> ± 0.357 | 0.525 |
| plasmid_cp32-8 | BB_L36 | <i>bppA</i> | <b>2.524</b> ± 1.391 | 0.086 | <b>1.840</b> ± 1.481 | 0.300 | <b>0.946</b> ± 0.345 | 0.640 | <b>1.113</b> ± 0.422 | 0.156 |
| plasmid_cp32-8 | BB_L37 | <i>bppB</i> | <b>2.377</b> ± 0.963 | 0.092 | <b>1.435</b> ± 1.021 | 0.479 | <b>1.232</b> ± 0.431 | 0.340 | <b>1.193</b> ± 0.452 | 0.422 |
| plasmid_cp32-8 | BB_L38 | <i>bppC</i> | <b>2.544</b> ± 1.668 | 0.132 | <b>0.943</b> ± 0.507 | 0.877 | <b>0.707</b> ± 0.378 | 0.471 | <b>0.938</b> ± 0.741 | 0.784 |
| plasmid_cp32-8 | BB_L39 | <i>erpN</i> | <b>2.847</b> ± 1.187 | 0.090 | <b>1.892</b> ± 1.255 | 0.300 | <b>1.005</b> ± 0.209 | 0.963 | <b>1.077</b> ± 0.169 | 0.030 |
| plasmid_cp32-8 | BB_L40 | <i>erpO</i> | <b>2.015</b> ± 0.145 | 0.000 | <b>1.692</b> ± 0.867 | 0.273 | <b>1.123</b> ± 0.160 | 0.294 | <b>1.227</b> ± 0.275 | 0.326 |
| plasmid_cp32-8 | BB_L41 |             | <b>2.697</b> ± 1.324 | 0.132 | <b>2.063</b> ± 1.850 | 0.399 | <b>0.926</b> ± 0.381 | 0.785 | <b>1.481</b> ± 0.582 | 0.205 |
| plasmid_cp32-8 | BB_L42 |             | <b>2.872</b> ± 2.762 | 0.163 | <b>2.280</b> ± 3.106 | 0.411 | <b>0.809</b> ± 0.690 | 0.244 | <b>0.963</b> ± 0.788 | 0.619 |
| plasmid_cp32-8 | BB_L43 |             | <b>2.285</b> ± 0.675 | 0.029 | <b>1.692</b> ± 1.238 | 0.367 | <b>0.910</b> ± 0.171 | 0.354 | <b>1.065</b> ± 0.285 | 0.374 |
| plasmid_cp32-9 | BB_N01 |             | <b>2.113</b> ± 0.626 | 0.054 | <b>1.632</b> ± 1.176 | 0.407 | <b>0.999</b> ± 0.115 | 0.992 | <b>1.123</b> ± 0.230 | 0.121 |
| plasmid_cp32-9 | BB_N02 |             | <b>1.552</b> ± 0.493 | 0.241 | <b>1.126</b> ± 0.313 | 0.303 | <b>0.901</b> ± 0.529 | 0.743 | <b>0.832</b> ± 0.157 | 0.013 |
| plasmid_cp32-9 | BB_N03 |             | <b>1.393</b> ± 0.875 | 0.213 | <b>0.939</b> ± 0.359 | 0.720 | <b>0.825</b> ± 0.418 | 0.230 | <b>1.085</b> ± 0.385 | 0.675 |
| plasmid_cp32-9 | BB_N04 |             | <b>2.632</b> ± 1.917 | 0.226 | <b>1.389</b> ± 0.905 | 0.409 | <b>0.957</b> ± 0.430 | 0.710 | <b>0.872</b> ± 0.191 | 0.309 |

|                |          |                                     |       |                      |       |                      |       |                      |       |
|----------------|----------|-------------------------------------|-------|----------------------|-------|----------------------|-------|----------------------|-------|
| plasmid_cp32-9 | BB_N05   | <b>1.291</b> ± 0.267                | 0.256 | <b>0.695</b> ± 0.457 | 0.356 | <b>1.518</b> ± 0.341 | 0.123 | <b>1.149</b> ± 0.792 | 0.767 |
| plasmid_cp32-9 | BB_N06   | <b>2.362</b> ± 0.518                | 0.016 | <b>1.343</b> ± 0.401 | 0.336 | <b>0.990</b> ± 0.313 | 0.901 | <b>1.033</b> ± 0.290 | 0.369 |
| plasmid_cp32-9 | BB_N07   | <b>0.615</b> ± 0.413                | 0.418 | <b>0.822</b> ± 0.515 | 0.573 | <b>0.854</b> ± 0.481 | 0.707 | <b>0.922</b> ± 0.542 | 0.875 |
| plasmid_cp32-9 | BB_N08   | <b>1.753</b> ± 0.592                | 0.056 | <b>1.127</b> ± 0.688 | 0.709 | <b>0.885</b> ± 0.301 | 0.006 | <b>1.138</b> ± 0.463 | 0.298 |
| plasmid_cp32-9 | BB_N09   | <b>2.037</b> ± 1.019                | 0.211 | <b>1.219</b> ± 0.935 | 0.713 | <b>0.574</b> ± 0.120 | 0.010 | <b>0.900</b> ± 0.355 | 0.635 |
| plasmid_cp32-9 | BB_N10   | <b>2.955</b> ± 1.137                | 0.047 | <b>1.789</b> ± 1.417 | 0.362 | <b>0.867</b> ± 0.257 | 0.275 | <b>1.062</b> ± 0.312 | 0.071 |
| plasmid_cp32-9 | BB_N11   | <b>2.185</b> ± 1.049                | 0.005 | <b>1.172</b> ± 0.953 | 0.532 | <b>0.920</b> ± 0.464 | 0.596 | <b>1.102</b> ± 0.493 | 0.552 |
| plasmid_cp32-9 | BB_N12   | <b>2.050</b> ± 0.690                | 0.082 | <b>1.997</b> ± 1.818 | 0.415 | <b>0.953</b> ± 0.203 | 0.654 | <b>0.965</b> ± 0.266 | 0.654 |
| plasmid_cp32-9 | BB_N13   | <b>2.945</b> ± 0.931                | 0.065 | <b>2.021</b> ± 1.279 | 0.301 | <b>1.469</b> ± 0.599 | 0.323 | <b>1.210</b> ± 0.345 | 0.412 |
| plasmid_cp32-9 | BB_N14   | <b>1.870</b> ± 0.501                | 0.003 | <b>1.724</b> ± 1.176 | 0.276 | <b>1.293</b> ± 0.472 | 0.399 | <b>1.125</b> ± 0.374 | 0.007 |
| plasmid_cp32-9 | BB_N15   | <b>1.812</b> ± 0.532                | 0.018 | <b>1.425</b> ± 1.031 | 0.452 | <b>0.887</b> ± 0.208 | 0.286 | <b>0.984</b> ± 0.306 | 0.588 |
| plasmid_cp32-9 | BB_N16   | <b>3.061</b> ± 1.776                | 0.088 | <b>1.595</b> ± 1.316 | 0.364 | <b>0.861</b> ± 0.515 | 0.192 | <b>1.054</b> ± 0.445 | 0.310 |
| plasmid_cp32-9 | BB_N17   | <b>1.879</b> ± 1.106                | 0.034 | <b>0.579</b> ± 0.298 | 0.337 | <b>0.979</b> ± 0.525 | 0.882 | <b>1.026</b> ± 0.579 | 0.686 |
| plasmid_cp32-9 | BB_N18   | <b>2.670</b> ± 2.667                | 0.113 | <b>2.613</b> ± 3.519 | 0.333 | <b>1.156</b> ± 0.987 | 0.387 | <b>1.141</b> ± 0.978 | 0.474 |
| plasmid_cp32-9 | BB_N19   | <b>1.842</b> ± 0.056                | 0.001 | <b>1.455</b> ± 0.485 | 0.251 | <b>1.031</b> ± 0.315 | 0.885 | <b>1.604</b> ± 0.678 | 0.267 |
| plasmid_cp32-9 | BB_N20   | <b>1.706</b> ± 0.570                | 0.005 | <b>0.787</b> ± 0.233 | 0.410 | <b>0.943</b> ± 0.406 | 0.318 | <b>1.014</b> ± 0.320 | 0.847 |
| plasmid_cp32-9 | BB_N21   | <b>1.874</b> ± 1.129                | 0.023 | <b>0.726</b> ± 0.388 | 0.317 | <b>0.818</b> ± 0.463 | 0.324 | <b>0.913</b> ± 0.559 | 0.698 |
| plasmid_cp32-9 | BB_N23   | <i>blyA</i><br><b>1.727</b> ± 1.107 | 0.039 | <b>1.634</b> ± 1.595 | 0.328 | <b>1.011</b> ± 0.604 | 0.959 | <b>1.176</b> ± 0.795 | 0.129 |
| plasmid_cp32-9 | BB_N24   | <i>blyB</i><br><b>2.359</b> ± 1.447 | 0.098 | <b>1.476</b> ± 0.951 | 0.480 | <b>0.936</b> ± 0.586 | 0.519 | <b>0.845</b> ± 0.392 | 0.693 |
| plasmid_cp32-9 | BB_N25   | <b>2.141</b> ± 1.160                | 0.100 | <b>1.701</b> ± 1.511 | 0.394 | <b>0.951</b> ± 0.413 | 0.710 | <b>1.069</b> ± 0.447 | 0.466 |
| plasmid_cp32-9 | BB_N26   | <b>1.308</b> ± 0.489                | 0.206 | <b>0.793</b> ± 0.329 | 0.426 | <b>0.946</b> ± 0.306 | 0.836 | <b>0.838</b> ± 0.250 | 0.401 |
| plasmid_cp32-9 | BB_N29   | <b>2.149</b> ± 0.740                | 0.073 | <b>1.761</b> ± 1.302 | 0.374 | <b>1.004</b> ± 0.309 | 0.970 | <b>1.059</b> ± 0.239 | 0.384 |
| plasmid_cp32-9 | BB_N34   | <i>bdrQ</i><br><b>1.692</b> ± 1.330 | 0.322 | <b>1.089</b> ± 0.590 | 0.515 | <b>0.844</b> ± 0.565 | 0.288 | <b>0.748</b> ± 0.542 | 0.214 |
| plasmid_cp32-9 | BB_N35   | <i>bppA</i><br><b>1.367</b> ± 0.583 | 0.015 | <b>1.031</b> ± 0.581 | 0.810 | <b>0.942</b> ± 0.365 | 0.636 | <b>1.134</b> ± 0.490 | 0.035 |
| plasmid_cp32-9 | BB_N36   | <i>bppB</i><br><b>1.107</b> ± 0.313 | 0.399 | <b>0.828</b> ± 0.302 | 0.489 | <b>1.051</b> ± 0.306 | 0.383 | <b>1.117</b> ± 0.353 | 0.241 |
| plasmid_cp32-9 | BB_N38   | <i>erpP</i><br><b>2.648</b> ± 2.321 | 0.092 | <b>2.280</b> ± 2.879 | 0.354 | <b>1.185</b> ± 1.001 | 0.355 | <b>1.213</b> ± 0.921 | 0.260 |
| plasmid_cp32-9 | BB_N39   | <i>erpQ</i><br><b>2.935</b> ± 1.200 | 0.116 | <b>3.241</b> ± 2.294 | 0.228 | <b>1.730</b> ± 0.965 | 0.304 | <b>2.023</b> ± 1.006 | 0.196 |
| plasmid_cp32-9 | BB_N41   | <b>1.900</b> ± 0.990                | 0.028 | <b>1.896</b> ± 1.561 | 0.262 | <b>0.893</b> ± 0.404 | 0.469 | <b>0.809</b> ± 0.320 | 0.436 |
| plasmid_cp32-9 | BB_N42   | <b>1.979</b> ± 1.184                | 0.037 | <b>1.524</b> ± 1.442 | 0.267 | <b>0.624</b> ± 0.386 | 0.349 | <b>1.006</b> ± 0.693 | 0.984 |
| plasmid_cp32-9 | BB_N43   | <b>1.420</b> ± 0.523                | 0.084 | <b>0.988</b> ± 0.452 | 0.924 | <b>0.851</b> ± 0.243 | 0.086 | <b>0.942</b> ± 0.260 | 0.179 |
| plasmid_cp9    | BBC02    | <b>1.803</b> ± 1.272                | 0.168 | <b>0.888</b> ± 0.695 | 0.158 | <b>1.700</b> ± 1.092 | 0.155 | <b>1.579</b> ± 0.861 | 0.140 |
| plasmid_cp9    | BBC03    | <b>0.729</b> ± 0.203                | 0.228 | <b>0.412</b> ± 0.353 | 0.155 | <b>0.961</b> ± 0.179 | 0.811 | <b>1.026</b> ± 0.224 | 0.785 |
| plasmid_cp9    | BBC05    | <b>0.936</b> ± 0.502                | 0.204 | <b>0.737</b> ± 0.500 | 0.019 | <b>0.922</b> ± 0.517 | 0.047 | <b>1.053</b> ± 0.480 | 0.538 |
| plasmid_cp9    | BBC06    | <b>1.729</b> ± 0.913                | 0.032 | <b>1.095</b> ± 0.676 | 0.618 | <b>0.920</b> ± 0.586 | 0.642 | <b>0.685</b> ± 0.399 | 0.215 |
| plasmid_cp9    | BBC07    | <b>0.981</b> ± 0.751                | 0.942 | <b>0.862</b> ± 0.749 | 0.614 | <b>1.239</b> ± 0.627 | 0.227 | <b>1.192</b> ± 0.611 | 0.525 |
| plasmid_cp9    | BBC08    | <b>1.622</b> ± 0.552                | 0.069 | <b>0.922</b> ± 0.248 | 0.184 | <b>0.951</b> ± 0.205 | 0.673 | <b>1.150</b> ± 0.420 | 0.425 |
| plasmid_cp9    | BBC10    | <b>1.568</b> ± 0.613                | 0.003 | <b>0.839</b> ± 0.362 | 0.267 | <b>0.999</b> ± 0.424 | 0.986 | <b>1.271</b> ± 0.463 | 0.187 |
| plasmid_cp9    | BBC11    | <b>1.432</b> ± 0.454                | 0.097 | <b>0.727</b> ± 0.292 | 0.041 | <b>0.889</b> ± 0.391 | 0.109 | <b>1.123</b> ± 0.590 | 0.597 |
| plasmid_cp9    | BBC12    | <b>0.879</b> ± 0.239                | 0.363 | <b>0.524</b> ± 0.418 | 0.175 | <b>0.933</b> ± 0.182 | 0.580 | <b>0.999</b> ± 0.152 | 0.980 |
| plasmid_lp17   | BB_D0027 | <b>1.216</b> ± 0.973                | 0.197 | <b>1.101</b> ± 0.835 | 0.640 | <b>0.739</b> ± 0.544 | 0.353 | <b>0.846</b> ± 0.675 | 0.318 |
| plasmid_lp17   | BB_D0031 | <b>2.038</b> ± 2.005                | 0.310 | <b>2.601</b> ± 3.010 | 0.353 | <b>0.892</b> ± 0.462 | 0.563 | <b>0.978</b> ± 0.568 | 0.790 |
| plasmid_lp17   | BB_D01   | <b>2.269</b> ± 1.041                | 0.178 | <b>2.397</b> ± 2.173 | 0.390 | <b>0.964</b> ± 0.289 | 0.880 | <b>1.114</b> ± 0.368 | 0.630 |
| plasmid_lp17   | BB_D03   | <b>1.852</b> ± 0.410                | 0.052 | <b>1.363</b> ± 0.280 | 0.133 | <b>1.059</b> ± 0.237 | 0.774 | <b>1.391</b> ± 0.152 | 0.041 |
| plasmid_lp17   | BB_D04   | <b>2.490</b> ± 2.446                | 0.298 | <b>1.766</b> ± 1.968 | 0.440 | <b>1.049</b> ± 0.687 | 0.919 | <b>0.971</b> ± 0.569 | 0.935 |
| plasmid_lp17   | BB_D05a  | <b>1.589</b> ± 0.608                | 0.017 | <b>1.583</b> ± 0.902 | 0.180 | <b>1.056</b> ± 0.352 | 0.513 | <b>0.984</b> ± 0.355 | 0.758 |
| plasmid_lp17   | BB_D09   | <b>1.253</b> ± 0.844                | 0.118 | <b>0.630</b> ± 0.433 | 0.498 | <b>0.993</b> ± 0.551 | 0.968 | <b>1.031</b> ± 0.693 | 0.451 |
| plasmid_lp17   | BB_D10   | <b>1.739</b> ± 1.102                | 0.175 | <b>1.357</b> ± 1.014 | 0.659 | <b>0.792</b> ± 0.285 | 0.413 | <b>1.002</b> ± 0.702 | 0.998 |
| plasmid_lp17   | BB_D15   | <b>1.767</b> ± 0.706                | 0.113 | <b>1.692</b> ± 0.964 | 0.268 | <b>1.028</b> ± 0.399 | 0.922 | <b>1.203</b> ± 0.501 | 0.381 |
| plasmid_lp17   | BB_D20   | <b>1.220</b> ± 0.653                | 0.240 | <b>1.003</b> ± 0.437 | 0.983 | <b>0.916</b> ± 0.380 | 0.652 | <b>1.204</b> ± 0.633 | 0.074 |
| plasmid_lp17   | BB_D23   | <b>1.178</b> ± 0.952                | 0.333 | <b>0.695</b> ± 0.407 | 0.535 | <b>0.905</b> ± 0.626 | 0.499 | <b>0.945</b> ± 0.668 | 0.760 |
| plasmid_lp17   | BB_D24   | <b>2.124</b> ± 1.771                | 0.062 | <b>1.572</b> ± 2.080 | 0.506 | <b>1.075</b> ± 0.887 | 0.858 | <b>1.105</b> ± 0.812 | 0.553 |
| plasmid_lp21   | BB_U01   | <b>1.899</b> ± 1.686                | 0.131 | <b>1.906</b> ± 2.602 | 0.438 | <b>0.813</b> ± 0.641 | 0.450 | <b>1.084</b> ± 1.043 | 0.540 |
| plasmid_lp21   | BB_U02   | <b>2.280</b> ± 0.950                | 0.086 | <b>1.245</b> ± 0.565 | 0.346 | <b>1.169</b> ± 0.248 | 0.132 | <b>1.073</b> ± 0.264 | 0.024 |
| plasmid_lp21   | BB_U05   | <b>2.281</b> ± 1.921                | 0.086 | <b>2.096</b> ± 2.193 | 0.239 | <b>1.457</b> ± 1.171 | 0.014 | <b>0.996</b> ± 0.815 | 0.989 |
| plasmid_lp21   | BB_U06   | <b>3.861</b> ± 3.551                | 0.219 | <b>1.537</b> ± 1.961 | 0.729 | <b>1.011</b> ± 0.904 | 0.988 | <b>1.892</b> ± 2.214 | 0.318 |
| plasmid_lp21   | BB_U08   | <b>3.364</b> ± 2.497                | 0.088 | <b>1.534</b> ± 1.454 | 0.324 | <b>1.100</b> ± 0.755 | 0.692 | <b>1.330</b> ± 1.363 | 0.480 |
| plasmid_lp21   | BB_U09   | <b>2.430</b> ± 1.011                | 0.137 | <b>1.933</b> ± 1.257 | 0.366 | <b>1.332</b> ± 0.565 | 0.169 | <b>0.863</b> ± 0.345 | 0.682 |
| plasmid_lp21   | BB_U10   | <b>3.415</b> ± 3.047                | 0.162 | <b>1.721</b> ± 1.001 | 0.008 | <b>1.134</b> ± 0.761 | 0.314 | <b>1.438</b> ± 0.849 | 0.062 |
| plasmid_lp21   | BB_U11   | <b>3.354</b> ± 1.357                | 0.075 | <b>1.509</b> ± 0.739 | 0.399 | <b>1.075</b> ± 0.347 | 0.771 | <b>1.039</b> ± 0.360 | 0.886 |
| plasmid_lp21   | BB_U12   | <b>1.601</b> ± 0.300                | 0.096 | <b>1.330</b> ± 0.368 | 0.265 | <b>1.034</b> ± 0.285 | 0.859 | <b>0.943</b> ± 0.168 | 0.703 |
| plasmid_lp25   | BB_E02   | <b>2.672</b> ± 1.235                | 0.018 | <b>2.284</b> ± 1.503 | 0.138 | <b>0.957</b> ± 0.388 | 0.771 | <b>1.052</b> ± 0.490 | 0.435 |
| plasmid_lp25   | BB_E05   | <b>2.272</b> ± 2.006                | 0.052 | <b>1.436</b> ± 1.245 | 0.491 | <b>0.694</b> ± 0.686 | 0.438 | <b>0.791</b> ± 0.750 | 0.769 |
| plasmid_lp25   | BB_E09   | <b>2.179</b> ± 1.064                | 0.162 | <b>2.159</b> ± 1.580 | 0.304 | <b>1.060</b> ± 0.230 | 0.185 | <b>1.167</b> ± 0.309 | 0.290 |
| plasmid_lp25   | BB_E16   | <b>3.003</b> ± 0.810                | 0.030 | <b>2.210</b> ± 1.484 | 0.275 | <b>1.030</b> ± 0.196 | 0.763 | <b>1.330</b> ± 0.518 | 0.247 |

|                |          |                      |       |                      |       |                      |       |                      |       |
|----------------|----------|----------------------|-------|----------------------|-------|----------------------|-------|----------------------|-------|
| plasmid_lp25   | BB_E17   | <b>0.566</b> ± 0.902 | 0.098 | <b>1.106</b> ± 1.812 | 0.930 | <b>1.167</b> ± 1.000 | 0.667 | <b>0.178</b> ± 0.246 | 0.214 |
| plasmid_lp25   | BB_E18   | <b>2.223</b> ± 1.725 | 0.027 | <b>0.899</b> ± 0.611 | 0.781 | <b>0.913</b> ± 0.827 | 0.443 | <b>1.182</b> ± 1.098 | 0.106 |
| plasmid_lp25   | BB_E22   | <b>3.626</b> ± 1.230 | 0.056 | <b>1.857</b> ± 1.214 | 0.307 | <b>1.278</b> ± 0.395 | 0.432 | <b>1.114</b> ± 0.299 | 0.428 |
| plasmid_lp25   | BB_E29   | <b>1.210</b> ± 0.807 | 0.356 | <b>0.684</b> ± 0.590 | 0.648 | <b>1.052</b> ± 0.868 | 0.225 | <b>1.243</b> ± 1.160 | 0.246 |
| plasmid_lp25   | BB_E29a  | <b>1.082</b> ± 0.483 | 0.841 | <b>0.891</b> ± 0.464 | 0.807 | <b>1.081</b> ± 0.429 | 0.766 | <b>0.942</b> ± 0.496 | 0.897 |
| plasmid_lp28-1 | BB_F001  | <b>1.494</b> ± 0.417 | 0.003 | <b>2.026</b> ± 0.902 | 0.139 | <b>0.997</b> ± 0.360 | 0.958 | <b>1.379</b> ± 0.458 | 0.022 |
| plasmid_lp28-1 | BB_F0034 | <b>1.577</b> ± 0.916 | 0.326 | <b>2.766</b> ± 3.313 | 0.436 | <b>1.075</b> ± 0.404 | 0.647 | <b>1.136</b> ± 0.660 | 0.698 |
| plasmid_lp28-1 | BB_F02   | <b>2.479</b> ± 0.749 | 0.035 | <b>2.024</b> ± 1.536 | 0.302 | <b>1.266</b> ± 0.461 | 0.483 | <b>1.616</b> ± 0.625 | 0.168 |
| plasmid_lp28-1 | BB_F03   | <b>1.408</b> ± 1.111 | 0.436 | <b>1.093</b> ± 0.458 | 0.799 | <b>1.141</b> ± 0.596 | 0.316 | <b>1.262</b> ± 0.947 | 0.508 |
| plasmid_lp28-1 | BB_F05   | <b>1.030</b> ± 0.684 | 0.664 | <b>2.583</b> ± 1.977 | 0.153 | <b>1.099</b> ± 0.478 | 0.690 | <b>1.231</b> ± 0.801 | 0.263 |
| plasmid_lp28-1 | BB_F08   | <b>1.115</b> ± 0.624 | 0.677 | <b>2.095</b> ± 1.670 | 0.321 | <b>0.932</b> ± 0.377 | 0.541 | <b>1.208</b> ± 0.296 | 0.005 |
| plasmid_lp28-1 | BB_F10   | <b>1.234</b> ± 0.566 | 0.113 | <b>1.666</b> ± 1.381 | 0.367 | <b>0.815</b> ± 0.272 | 0.212 | <b>1.006</b> ± 0.344 | 0.967 |
| plasmid_lp28-1 | BB_F12   | <b>0.952</b> ± 1.577 | 0.808 | <b>2.088</b> ± 3.214 | 0.220 | <b>0.940</b> ± 1.220 | 0.939 | <b>1.208</b> ± 1.574 | 0.593 |
| plasmid_lp28-1 | BB_F13   | <b>1.371</b> ± 0.572 | 0.019 | <b>1.764</b> ± 1.197 | 0.189 | <b>0.980</b> ± 0.431 | 0.909 | <b>1.240</b> ± 0.741 | 0.252 |
| plasmid_lp28-1 | BB_F14   | <b>2.241</b> ± 1.254 | 0.028 | <b>7.008</b> ± 4.389 | 0.062 | <b>1.122</b> ± 1.166 | 0.895 | <b>2.822</b> ± 1.491 | 0.030 |
| plasmid_lp28-1 | BB_F16   | <b>1.333</b> ± 0.334 | 0.248 | <b>1.697</b> ± 1.408 | 0.487 | <b>0.917</b> ± 0.127 | 0.496 | <b>1.216</b> ± 0.428 | 0.519 |
| plasmid_lp28-1 | BB_F17   | <b>1.155</b> ± 0.440 | 0.119 | <b>1.794</b> ± 1.174 | 0.248 | <b>0.881</b> ± 0.242 | 0.261 | <b>1.100</b> ± 0.425 | 0.206 |
| plasmid_lp28-1 | BB_F18   | <b>1.510</b> ± 1.023 | 0.260 | <b>2.202</b> ± 2.049 | 0.318 | <b>1.005</b> ± 0.583 | 0.959 | <b>0.985</b> ± 0.493 | 0.909 |
| plasmid_lp28-1 | BB_F19   | <b>1.252</b> ± 0.668 | 0.208 | <b>1.837</b> ± 1.517 | 0.307 | <b>1.050</b> ± 0.407 | 0.586 | <b>1.303</b> ± 0.644 | 0.077 |
| plasmid_lp28-1 | BB_F19a  | <b>1.100</b> ± 0.513 | 0.765 | <b>1.425</b> ± 0.672 | 0.335 | <b>0.930</b> ± 0.531 | 0.621 | <b>1.127</b> ± 0.428 | 0.684 |
| plasmid_lp28-1 | BB_F20   | <b>0.977</b> ± 0.251 | 0.897 | <b>1.314</b> ± 1.180 | 0.618 | <b>1.046</b> ± 0.406 | 0.804 | <b>0.715</b> ± 0.417 | 0.148 |
| plasmid_lp28-1 | BB_F26a  | <b>0.070</b> ± 0.091 | 0.192 | <b>0.043</b> ± 0.071 | 0.176 | <b>0.224</b> ± 0.388 | 0.087 | <b>0.389</b> ± 0.562 | 0.434 |
| plasmid_lp28-1 | BB_F30   | <b>1.015</b> ± 0.358 | 0.951 | <b>2.568</b> ± 0.926 | 0.009 | <b>0.780</b> ± 0.330 | 0.529 | <b>1.435</b> ± 0.506 | 0.255 |
| plasmid_lp28-1 | BB_F32   | <b>0.791</b> ± 0.379 | 0.197 | <b>0.899</b> ± 0.351 | 0.718 | <b>0.939</b> ± 0.431 | 0.563 | <b>1.139</b> ± 0.599 | 0.435 |
| plasmid_lp28-2 | BB_G01   | <b>1.792</b> ± 1.316 | 0.113 | <b>2.039</b> ± 1.835 | 0.240 | <b>0.881</b> ± 0.456 | 0.675 | <b>1.211</b> ± 0.657 | 0.401 |
| plasmid_lp28-2 | BB_G02   | <b>1.700</b> ± 0.849 | 0.013 | <b>0.819</b> ± 0.427 | 0.686 | <b>1.102</b> ± 0.586 | 0.260 | <b>1.249</b> ± 0.826 | 0.169 |
| plasmid_lp28-2 | BB_G03   | <b>2.230</b> ± 1.788 | 0.239 | <b>1.917</b> ± 2.081 | 0.412 | <b>0.679</b> ± 0.463 | 0.159 | <b>0.916</b> ± 0.642 | 0.782 |
| plasmid_lp28-2 | BB_G05   | <b>2.792</b> ± 1.045 | 0.040 | <b>2.027</b> ± 1.587 | 0.308 | <b>0.921</b> ± 0.232 | 0.356 | <b>1.065</b> ± 0.354 | 0.401 |
| plasmid_lp28-2 | BB_G10   | <b>1.966</b> ± 0.716 | 0.026 | <b>1.683</b> ± 0.971 | 0.192 | <b>0.736</b> ± 0.199 | 0.153 | <b>1.033</b> ± 0.328 | 0.547 |
| plasmid_lp28-2 | BB_G12   | <b>1.044</b> ± 1.235 | 0.950 | <b>1.160</b> ± 1.084 | 0.585 | <b>0.596</b> ± 0.674 | 0.611 | <b>1.010</b> ± 1.001 | 0.989 |
| plasmid_lp28-2 | BB_G13   | <b>2.241</b> ± 1.331 | 0.103 | <b>1.449</b> ± 0.878 | 0.269 | <b>1.045</b> ± 0.690 | 0.916 | <b>1.265</b> ± 0.791 | 0.480 |
| plasmid_lp28-2 | BB_G14   | <b>2.180</b> ± 1.876 | 0.111 | <b>2.268</b> ± 2.336 | 0.214 | <b>0.807</b> ± 0.518 | 0.691 | <b>1.244</b> ± 0.849 | 0.428 |
| plasmid_lp28-2 | BB_G15   | <b>2.090</b> ± 0.436 | 0.004 | <b>1.527</b> ± 1.145 | 0.427 | <b>0.868</b> ± 0.260 | 0.428 | <b>0.960</b> ± 0.392 | 0.810 |
| plasmid_lp28-2 | BB_G16   | <b>1.899</b> ± 0.510 | 0.072 | <b>1.328</b> ± 0.715 | 0.324 | <b>0.821</b> ± 0.424 | 0.364 | <b>0.959</b> ± 0.335 | 0.893 |
| plasmid_lp28-2 | BB_G17   | <b>1.746</b> ± 0.618 | 0.151 | <b>1.846</b> ± 1.440 | 0.405 | <b>0.658</b> ± 0.596 | 0.399 | <b>0.590</b> ± 0.614 | 0.353 |
| plasmid_lp28-2 | BB_G18   | <b>2.213</b> ± 1.564 | 0.032 | <b>1.423</b> ± 1.353 | 0.293 | <b>0.956</b> ± 0.727 | 0.831 | <b>0.918</b> ± 0.899 | 0.457 |
| plasmid_lp28-2 | BB_G20   | <b>1.961</b> ± 1.428 | 0.029 | <b>2.209</b> ± 2.235 | 0.239 | <b>0.782</b> ± 0.510 | 0.478 | <b>1.029</b> ± 0.678 | 0.863 |
| plasmid_lp28-2 | BB_G21   | <b>1.942</b> ± 1.434 | 0.187 | <b>2.044</b> ± 1.944 | 0.324 | <b>0.748</b> ± 0.311 | 0.456 | <b>0.802</b> ± 0.637 | 0.356 |
| plasmid_lp28-2 | BB_G22   | <b>2.657</b> ± 1.216 | 0.026 | <b>1.550</b> ± 0.943 | 0.166 | <b>0.873</b> ± 0.300 | 0.560 | <b>1.047</b> ± 0.448 | 0.345 |
| plasmid_lp28-2 | BB_G23   | <b>1.725</b> ± 0.808 | 0.014 | <b>1.375</b> ± 1.082 | 0.391 | <b>0.669</b> ± 0.346 | 0.134 | <b>0.841</b> ± 0.434 | 0.221 |
| plasmid_lp28-2 | BB_G24   | <b>0.848</b> ± 0.272 | 0.503 | <b>0.706</b> ± 0.275 | 0.357 | <b>0.914</b> ± 0.480 | 0.181 | <b>1.031</b> ± 0.528 | 0.693 |
| plasmid_lp28-2 | BB_G25   | <b>1.876</b> ± 0.735 | 0.044 | <b>1.253</b> ± 0.589 | 0.135 | <b>0.838</b> ± 0.377 | 0.670 | <b>1.092</b> ± 0.430 | 0.180 |
| plasmid_lp28-2 | BB_G27   | <b>2.430</b> ± 0.963 | 0.042 | <b>1.538</b> ± 1.173 | 0.319 | <b>1.070</b> ± 0.415 | 0.548 | <b>1.152</b> ± 0.498 | 0.394 |
| plasmid_lp28-2 | BB_G28   | <b>3.000</b> ± 3.746 | 0.238 | <b>2.202</b> ± 1.972 | 0.009 | <b>1.210</b> ± 1.529 | 0.397 | <b>1.621</b> ± 2.322 | 0.424 |
| plasmid_lp28-2 | BB_G29   | <b>2.380</b> ± 0.623 | 0.062 | <b>1.749</b> ± 0.967 | 0.310 | <b>0.999</b> ± 0.049 | 0.989 | <b>1.079</b> ± 0.151 | 0.483 |
| plasmid_lp28-2 | BB_G30   | <b>2.446</b> ± 2.105 | 0.202 | <b>3.776</b> ± 5.402 | 0.384 | <b>1.183</b> ± 1.507 | 0.711 | <b>1.412</b> ± 1.161 | 0.341 |
| plasmid_lp28-2 | BB_G31   | <b>2.199</b> ± 2.318 | 0.219 | <b>2.112</b> ± 2.789 | 0.135 | <b>0.713</b> ± 0.785 | 0.630 | <b>1.612</b> ± 1.745 | 0.411 |
| plasmid_lp28-2 | BB_G32   | <b>1.529</b> ± 0.924 | 0.071 | <b>0.804</b> ± 0.407 | 0.652 | <b>0.861</b> ± 0.378 | 0.548 | <b>1.024</b> ± 0.806 | 0.900 |
| plasmid_lp28-2 | BB_G34   | <b>2.715</b> ± 1.610 | 0.060 | <b>2.311</b> ± 2.046 | 0.223 | <b>0.936</b> ± 0.641 | 0.061 | <b>1.540</b> ± 0.918 | 0.101 |
| plasmid_lp28-3 | BB_H02   | <b>2.212</b> ± 1.115 | 0.198 | <b>2.359</b> ± 1.983 | 0.358 | <b>1.022</b> ± 0.315 | 0.931 | <b>1.069</b> ± 0.357 | 0.700 |
| plasmid_lp28-3 | BB_H04   | <b>2.001</b> ± 0.869 | 0.174 | <b>1.578</b> ± 0.741 | 0.120 | <b>1.642</b> ± 0.562 | 0.213 | <b>1.514</b> ± 0.902 | 0.324 |
| plasmid_lp28-3 | BB_H05   | <b>2.210</b> ± 1.363 | 0.150 | <b>1.651</b> ± 1.111 | 0.288 | <b>0.850</b> ± 0.278 | 0.346 | <b>1.112</b> ± 0.672 | 0.817 |
| plasmid_lp28-3 | BB_H06   | <b>1.650</b> ± 1.224 | 0.123 | <b>1.547</b> ± 1.271 | 0.240 | <b>0.990</b> ± 0.584 | 0.959 | <b>1.215</b> ± 0.782 | 0.214 |
| plasmid_lp28-3 | BB_H07   | <b>1.245</b> ± 0.116 | 0.019 | <b>2.062</b> ± 1.107 | 0.245 | <b>0.965</b> ± 0.313 | 0.864 | <b>0.946</b> ± 0.104 | 0.569 |
| plasmid_lp28-3 | BB_H09   | <b>1.128</b> ± 0.405 | 0.473 | <b>1.145</b> ± 0.539 | 0.584 | <b>0.940</b> ± 0.217 | 0.496 | <b>1.080</b> ± 0.361 | 0.521 |
| plasmid_lp28-3 | BB_H09a  | <b>1.426</b> ± 0.493 | 0.293 | <b>1.909</b> ± 1.435 | 0.370 | <b>0.838</b> ± 0.283 | 0.551 | <b>1.449</b> ± 0.586 | 0.312 |
| plasmid_lp28-3 | BB_H13   | <b>2.171</b> ± 0.923 | 0.099 | <b>2.866</b> ± 1.792 | 0.177 | <b>0.806</b> ± 0.351 | 0.549 | <b>1.400</b> ± 0.730 | 0.364 |
| plasmid_lp28-3 | BB_H17   | <b>2.525</b> ± 1.934 | 0.208 | <b>1.636</b> ± 1.265 | 0.156 | <b>1.153</b> ± 0.896 | 0.359 | <b>0.854</b> ± 0.546 | 0.594 |
| plasmid_lp28-3 | BB_H18   | <b>0.867</b> ± 0.324 | 0.290 | <b>1.136</b> ± 0.418 | 0.247 | <b>0.946</b> ± 0.283 | 0.648 | <b>1.042</b> ± 0.404 | 0.522 |
| plasmid_lp28-3 | BB_H20   | <b>1.441</b> ± 0.607 | 0.112 | <b>1.715</b> ± 1.229 | 0.300 | <b>1.061</b> ± 0.370 | 0.774 | <b>1.292</b> ± 0.509 | 0.037 |
| plasmid_lp28-3 | BB_H30   | <b>1.000</b> ± 0.700 | 0.998 | <b>0.741</b> ± 0.420 | 0.519 | <b>0.926</b> ± 0.656 | 0.546 | <b>1.143</b> ± 0.903 | 0.144 |
| plasmid_lp28-3 | BB_H32   | <b>1.088</b> ± 0.617 | 0.864 | <b>3.019</b> ± 2.431 | 0.286 | <b>1.392</b> ± 0.624 | 0.302 | <b>1.360</b> ± 0.678 | 0.526 |
| plasmid_lp28-3 | BB_H33   | <b>1.221</b> ± 0.724 | 0.328 | <b>1.945</b> ± 1.854 | 0.369 | <b>1.171</b> ± 0.515 | 0.591 | <b>1.026</b> ± 0.481 | 0.790 |
| plasmid_lp28-3 | BB_H37   | <b>1.096</b> ± 0.558 | 0.790 | <b>1.695</b> ± 1.363 | 0.429 | <b>0.666</b> ± 0.388 | 0.171 | <b>1.036</b> ± 0.527 | 0.827 |

|                |          |   |                      |       |                      |       |                      |       |                      |       |
|----------------|----------|---|----------------------|-------|----------------------|-------|----------------------|-------|----------------------|-------|
| plasmid_lp28-3 | BB_H41   |   | <b>1.459</b> ± 1.210 | 0.589 | <b>0.571</b> ± 0.744 | 0.215 | <b>0.946</b> ± 1.261 | 0.948 | <b>1.201</b> ± 1.724 | 0.885 |
| plasmid_lp28-4 | BB_I01   | x | <b>1.559</b> ± 1.500 | 0.218 | <b>0.436</b> ± 0.360 | 0.372 | <b>0.986</b> ± 0.768 | 0.925 | <b>1.030</b> ± 0.944 | 0.674 |
| plasmid_lp28-4 | BB_I02   | x | <b>2.290</b> ± 0.941 | 0.089 | <b>1.253</b> ± 0.561 | 0.356 | <b>1.174</b> ± 0.240 | 0.133 | <b>1.081</b> ± 0.257 | 0.051 |
| plasmid_lp28-4 | BB_I39   | x | <b>0.957</b> ± 0.461 | 0.763 | <b>1.031</b> ± 0.325 | 0.641 | <b>0.984</b> ± 0.374 | 0.890 | <b>1.251</b> ± 0.474 | 0.082 |
| plasmid_lp28-4 | BB_I42   | x | <b>0.816</b> ± 0.605 | 0.482 | <b>1.012</b> ± 0.708 | 0.804 | <b>0.438</b> ± 0.246 | 0.106 | <b>0.733</b> ± 0.412 | 0.508 |
| plasmid_lp28-4 | BB_I43   | x | <b>0.695</b> ± 0.485 | 0.511 | <b>1.165</b> ± 0.784 | 0.765 | <b>0.367</b> ± 0.178 | 0.164 | <b>0.417</b> ± 0.383 | 0.021 |
| plasmid_lp36   | BB_K0058 |   | <b>1.222</b> ± 0.860 | 0.605 | <b>1.603</b> ± 1.859 | 0.503 | <b>1.244</b> ± 1.590 | 0.779 | <b>0.867</b> ± 0.533 | 0.767 |
| plasmid_lp36   | BB_K01   |   | <b>1.208</b> ± 1.151 | 0.270 | <b>1.611</b> ± 1.787 | 0.339 | <b>0.747</b> ± 0.679 | 0.107 | <b>0.988</b> ± 0.939 | 0.834 |
| plasmid_lp36   | BB_K02a  |   | <b>0.617</b> ± 0.361 | 0.079 | <b>0.760</b> ± 0.297 | 0.124 | <b>0.753</b> ± 0.198 | 0.001 | <b>0.917</b> ± 0.161 | 0.205 |
| plasmid_lp36   | BB_K07   |   | <b>0.923</b> ± 0.441 | 0.437 | <b>1.170</b> ± 0.608 | 0.503 | <b>0.726</b> ± 0.199 | 0.192 | <b>0.955</b> ± 0.371 | 0.558 |
| plasmid_lp36   | BB_K12   |   | <b>1.117</b> ± 0.699 | 0.313 | <b>1.766</b> ± 1.818 | 0.412 | <b>0.771</b> ± 0.389 | 0.194 | <b>1.001</b> ± 0.567 | 0.955 |
| plasmid_lp36   | BB_K13   |   | <b>0.957</b> ± 0.379 | 0.637 | <b>1.006</b> ± 0.525 | 0.971 | <b>0.832</b> ± 0.213 | 0.423 | <b>0.927</b> ± 0.246 | 0.332 |
| plasmid_lp36   | BB_K15   |   | <b>1.101</b> ± 0.352 | 0.182 | <b>1.475</b> ± 0.838 | 0.230 | <b>0.760</b> ± 0.219 | 0.175 | <b>0.979</b> ± 0.340 | 0.716 |
| plasmid_lp36   | BB_K17   |   | <b>1.073</b> ± 0.517 | 0.117 | <b>1.623</b> ± 1.406 | 0.372 | <b>0.751</b> ± 0.308 | 0.183 | <b>1.144</b> ± 0.570 | 0.099 |
| plasmid_lp36   | BB_K19   |   | <b>1.011</b> ± 0.145 | 0.860 | <b>1.551</b> ± 0.948 | 0.403 | <b>0.695</b> ± 0.081 | 0.005 | <b>0.943</b> ± 0.074 | 0.327 |
| plasmid_lp36   | BB_K32   |   | <b>1.088</b> ± 0.387 | 0.281 | <b>1.442</b> ± 0.887 | 0.343 | <b>0.830</b> ± 0.237 | 0.151 | <b>1.082</b> ± 0.284 | 0.460 |
| plasmid_lp36   | BB_K34   |   | <b>1.524</b> ± 0.287 | 0.114 | <b>1.772</b> ± 1.270 | 0.420 | <b>0.950</b> ± 0.126 | 0.382 | <b>1.304</b> ± 0.269 | 0.250 |
| plasmid_lp36   | BB_K35   |   | <b>1.271</b> ± 0.481 | 0.182 | <b>1.829</b> ± 1.183 | 0.269 | <b>0.889</b> ± 0.200 | 0.186 | <b>1.125</b> ± 0.378 | 0.253 |
| plasmid_lp36   | BB_K37   |   | <b>1.390</b> ± 1.048 | 0.482 | <b>1.645</b> ± 0.897 | 0.202 | <b>0.739</b> ± 0.575 | 0.320 | <b>1.631</b> ± 0.514 | 0.066 |
| plasmid_lp36   | BB_K39   |   | <b>1.100</b> ± 0.206 | 0.593 | <b>0.923</b> ± 0.167 | 0.297 | <b>0.674</b> ± 0.170 | 0.088 | <b>0.839</b> ± 0.188 | 0.056 |
| plasmid_lp36   | BB_K40   |   | <b>1.095</b> ± 0.554 | 0.330 | <b>1.298</b> ± 0.960 | 0.430 | <b>0.664</b> ± 0.267 | 0.180 | <b>0.837</b> ± 0.337 | 0.342 |
| plasmid_lp36   | BB_K41   |   | <b>1.139</b> ± 0.671 | 0.364 | <b>1.579</b> ± 1.210 | 0.117 | <b>0.776</b> ± 0.434 | 0.405 | <b>1.108</b> ± 0.606 | 0.665 |
| plasmid_lp36   | BB_K42a  |   | <b>1.124</b> ± 0.523 | 0.046 | <b>1.919</b> ± 1.600 | 0.284 | <b>0.880</b> ± 0.392 | 0.302 | <b>1.223</b> ± 0.696 | 0.233 |
| plasmid_lp36   | BB_K45   |   | <b>0.978</b> ± 0.760 | 0.826 | <b>1.543</b> ± 1.569 | 0.383 | <b>0.730</b> ± 0.471 | 0.188 | <b>0.934</b> ± 0.583 | 0.630 |
| plasmid_lp36   | BB_K46   |   | <b>1.191</b> ± 0.379 | 0.212 | <b>1.495</b> ± 0.990 | 0.418 | <b>0.800</b> ± 0.197 | 0.358 | <b>0.941</b> ± 0.200 | 0.553 |
| plasmid_lp36   | BB_K47   |   | <b>1.274</b> ± 0.418 | 0.097 | <b>1.598</b> ± 1.201 | 0.403 | <b>0.783</b> ± 0.193 | 0.043 | <b>1.136</b> ± 0.399 | 0.253 |
| plasmid_lp36   | BB_K48   |   | <b>1.222</b> ± 0.465 | 0.285 | <b>1.316</b> ± 0.648 | 0.296 | <b>0.848</b> ± 0.234 | 0.037 | <b>1.251</b> ± 0.408 | 0.139 |
| plasmid_lp36   | BB_K49   |   | <b>1.105</b> ± 0.380 | 0.048 | <b>1.569</b> ± 1.107 | 0.334 | <b>0.817</b> ± 0.271 | 0.061 | <b>1.067</b> ± 0.433 | 0.316 |
| plasmid_lp36   | BB_K50   |   | <b>1.264</b> ± 0.333 | 0.184 | <b>1.225</b> ± 0.316 | 0.063 | <b>0.821</b> ± 0.189 | 0.313 | <b>1.118</b> ± 0.243 | 0.237 |
| plasmid_lp36   | BB_K52   |   | <b>1.240</b> ± 0.479 | 0.231 | <b>1.653</b> ± 1.014 | 0.204 | <b>0.957</b> ± 0.345 | 0.814 | <b>1.246</b> ± 0.529 | 0.152 |
| plasmid_lp36   | BB_K53   |   | <b>0.873</b> ± 0.427 | 0.502 | <b>1.016</b> ± 0.632 | 0.914 | <b>0.497</b> ± 0.243 | 0.028 | <b>0.728</b> ± 0.317 | 0.406 |
| plasmid_lp36   | BB_K55   |   | <b>1.144</b> ± 0.862 | 0.699 | <b>1.491</b> ± 1.349 | 0.071 | <b>0.743</b> ± 0.609 | 0.549 | <b>1.265</b> ± 0.999 | 0.469 |
| plasmid_lp38   | BB_J0056 |   | <b>1.526</b> ± 1.066 | 0.500 | <b>1.742</b> ± 0.737 | 0.041 | <b>1.277</b> ± 1.004 | 0.716 | <b>2.009</b> ± 1.365 | 0.199 |
| plasmid_lp38   | BB_J02a  |   | <b>0.795</b> ± 0.289 | 0.363 | <b>0.955</b> ± 0.407 | 0.856 | <b>0.867</b> ± 0.185 | 0.293 | <b>1.153</b> ± 0.155 | 0.201 |
| plasmid_lp38   | BB_J05   |   | <b>0.839</b> ± 0.638 | 0.008 | <b>0.970</b> ± 0.901 | 0.877 | <b>0.991</b> ± 0.668 | 0.760 | <b>1.077</b> ± 0.666 | 0.223 |
| plasmid_lp38   | BB_J08   |   | <b>0.837</b> ± 0.657 | 0.424 | <b>1.897</b> ± 1.958 | 0.303 | <b>0.703</b> ± 0.459 | 0.365 | <b>1.007</b> ± 0.647 | 0.962 |
| plasmid_lp38   | BB_J09   |   | <b>0.836</b> ± 0.168 | 0.216 | <b>1.368</b> ± 0.364 | 0.148 | <b>0.932</b> ± 0.425 | 0.668 | <b>1.361</b> ± 0.702 | 0.328 |
| plasmid_lp38   | BB_J11   |   | <b>0.524</b> ± 0.206 | 0.050 | <b>0.631</b> ± 0.466 | 0.243 | <b>0.543</b> ± 0.303 | 0.087 | <b>0.454</b> ± 0.335 | 0.136 |
| plasmid_lp38   | BB_J13   |   | <b>1.155</b> ± 0.979 | 0.611 | <b>2.022</b> ± 2.261 | 0.217 | <b>0.497</b> ± 0.434 | 0.267 | <b>0.898</b> ± 0.877 | 0.645 |
| plasmid_lp38   | BB_J15a  |   | <b>1.160</b> ± 0.193 | 0.141 | <b>1.500</b> ± 0.381 | 0.108 | <b>0.800</b> ± 0.076 | 0.103 | <b>1.260</b> ± 0.276 | 0.154 |
| plasmid_lp38   | BB_J20   |   | <b>0.822</b> ± 0.523 | 0.742 | <b>1.814</b> ± 1.477 | 0.259 | <b>0.708</b> ± 0.554 | 0.023 | <b>1.602</b> ± 0.817 | 0.157 |
| plasmid_lp38   | BB_J21a  |   | <b>1.534</b> ± 1.130 | 0.226 | <b>1.563</b> ± 1.413 | 0.248 | <b>0.797</b> ± 0.614 | 0.099 | <b>1.065</b> ± 0.740 | 0.842 |
| plasmid_lp38   | BB_J23   |   | <b>2.090</b> ± 1.905 | 0.069 | <b>0.904</b> ± 0.791 | 0.874 | <b>0.919</b> ± 0.979 | 0.694 | <b>0.875</b> ± 1.047 | 0.633 |
| plasmid_lp38   | BB_J24   |   | <b>0.768</b> ± 0.321 | 0.116 | <b>1.108</b> ± 0.596 | 0.330 | <b>0.687</b> ± 0.277 | 0.126 | <b>0.879</b> ± 0.350 | 0.499 |
| plasmid_lp38   | BB_J27   |   | <b>0.939</b> ± 0.376 | 0.675 | <b>1.302</b> ± 0.844 | 0.525 | <b>0.764</b> ± 0.170 | 0.010 | <b>0.891</b> ± 0.256 | 0.303 |
| plasmid_lp38   | BB_J28   |   | <b>1.117</b> ± 0.668 | 0.274 | <b>2.193</b> ± 1.747 | 0.214 | <b>0.964</b> ± 0.614 | 0.867 | <b>1.140</b> ± 0.643 | 0.555 |
| plasmid_lp38   | BB_J29   |   | <b>0.642</b> ± 0.560 | 0.050 | <b>0.891</b> ± 0.756 | 0.404 | <b>0.839</b> ± 0.573 | 0.109 | <b>0.987</b> ± 0.628 | 0.899 |
| plasmid_lp38   | BB_J31   |   | <b>1.049</b> ± 0.462 | 0.384 | <b>1.123</b> ± 0.553 | 0.245 | <b>0.922</b> ± 0.349 | 0.380 | <b>0.990</b> ± 0.457 | 0.769 |
| plasmid_lp38   | BB_J34   |   | <b>1.184</b> ± 0.426 | 0.161 | <b>1.588</b> ± 1.199 | 0.400 | <b>0.799</b> ± 0.183 | 0.212 | <b>1.018</b> ± 0.342 | 0.841 |
| plasmid_lp38   | BB_J36   |   | <b>1.296</b> ± 0.664 | 0.470 | <b>1.719</b> ± 1.852 | 0.567 | <b>0.906</b> ± 0.416 | 0.740 | <b>1.063</b> ± 0.358 | 0.775 |
| plasmid_lp38   | BB_J37   |   | <b>1.031</b> ± 0.150 | 0.698 | <b>1.451</b> ± 0.613 | 0.378 | <b>0.824</b> ± 0.111 | 0.009 | <b>1.070</b> ± 0.182 | 0.545 |
| plasmid_lp38   | BB_J41   |   | <b>0.938</b> ± 0.446 | 0.613 | <b>0.895</b> ± 0.224 | 0.546 | <b>0.964</b> ± 0.347 | 0.612 | <b>1.273</b> ± 0.506 | 0.083 |
| plasmid_lp38   | BB_J43   |   | <b>0.636</b> ± 0.582 | 0.047 | <b>0.872</b> ± 0.786 | 0.375 | <b>0.844</b> ± 0.600 | 0.096 | <b>0.991</b> ± 0.660 | 0.927 |
| plasmid_lp38   | BB_J45   |   | <b>1.041</b> ± 0.420 | 0.117 | <b>1.324</b> ± 0.741 | 0.236 | <b>0.924</b> ± 0.330 | 0.381 | <b>1.121</b> ± 0.509 | 0.241 |
| plasmid_lp38   | BB_J46   |   | <b>1.603</b> ± 0.569 | 0.081 | <b>1.367</b> ± 0.728 | 0.199 | <b>0.903</b> ± 0.350 | 0.596 | <b>1.188</b> ± 0.465 | 0.541 |
| plasmid_lp38   | BB_J47   |   | <b>2.213</b> ± 1.806 | 0.189 | <b>1.100</b> ± 0.705 | 0.870 | <b>1.203</b> ± 0.746 | 0.122 | <b>1.853</b> ± 1.268 | 0.265 |
| plasmid_lp38   | BB_J48   |   | <b>1.409</b> ± 1.409 | 0.487 | <b>2.280</b> ± 2.738 | 0.395 | <b>1.092</b> ± 0.913 | 0.820 | <b>1.246</b> ± 1.015 | 0.714 |
| plasmid_lp38   | BB_J50   |   | <b>1.692</b> ± 1.247 | 0.334 | <b>2.096</b> ± 2.050 | 0.403 | <b>1.336</b> ± 0.811 | 0.383 | <b>1.264</b> ± 0.718 | 0.402 |
| plasmid_lp38   | BB_J51   |   | <b>0.714</b> ± 0.119 | 0.116 | <b>0.815</b> ± 0.164 | 0.045 | <b>0.880</b> ± 0.266 | 0.357 | <b>0.976</b> ± 0.297 | 0.786 |
| plasmid_lp5    | BB_T01   |   | <b>2.315</b> ± 2.018 | 0.300 | <b>1.837</b> ± 1.266 | 0.237 | <b>0.966</b> ± 0.358 | 0.724 | <b>1.045</b> ± 0.516 | 0.861 |
| plasmid_lp5    | BB_T02   |   | <b>2.694</b> ± 2.386 | 0.209 | <b>0.898</b> ± 1.241 | 0.828 | <b>0.787</b> ± 0.452 | 0.417 | <b>0.737</b> ± 0.594 | 0.178 |
| plasmid_lp5    | BB_T03   |   | <b>3.084</b> ± 1.781 | 0.036 | <b>1.765</b> ± 1.429 | 0.208 | <b>1.085</b> ± 0.530 | 0.762 | <b>1.050</b> ± 0.948 | 0.876 |
| plasmid_lp5    | BB_T04   |   | <b>3.586</b> ± 3.242 | 0.169 | <b>1.811</b> ± 1.028 | 0.014 | <b>1.171</b> ± 0.763 | 0.241 | <b>1.449</b> ± 0.890 | 0.059 |
| plasmid_lp5    | BB_T06   |   | <b>3.318</b> ± 1.303 | 0.073 | <b>1.509</b> ± 0.705 | 0.379 | <b>1.075</b> ± 0.333 | 0.759 | <b>1.022</b> ± 0.345 | 0.934 |

|              |          |              |                      |       |                      |       |                      |       |                      |       |
|--------------|----------|--------------|----------------------|-------|----------------------|-------|----------------------|-------|----------------------|-------|
| plasmid_lp5  | BB_T07   |              | <b>1.593</b> ± 0.266 | 0.080 | <b>1.302</b> ± 0.328 | 0.286 | <b>1.048</b> ± 0.301 | 0.803 | <b>0.955</b> ± 0.167 | 0.751 |
| plasmid_lp54 | BB_A0078 |              | <b>0.683</b> ± 0.842 | 0.480 | <b>1.488</b> ± 1.097 | 0.343 | <b>0.718</b> ± 0.471 | 0.046 | <b>1.154</b> ± 1.298 | 0.821 |
| plasmid_lp54 | BB_A01   |              | <b>1.283</b> ± 0.484 | 0.278 | <b>1.753</b> ± 0.689 | 0.037 | <b>1.681</b> ± 0.697 | 0.236 | <b>1.877</b> ± 1.069 | 0.141 |
| plasmid_lp54 | BB_A03   |              | <b>0.724</b> ± 1.079 | 0.724 | <b>1.035</b> ± 1.772 | 0.976 | <b>0.194</b> ± 0.286 | 0.012 | <b>0.264</b> ± 0.164 | 0.039 |
| plasmid_lp54 | BB_A04   |              | <b>1.147</b> ± 0.369 | 0.562 | <b>3.180</b> ± 4.129 | 0.423 | <b>0.977</b> ± 0.429 | 0.842 | <b>1.596</b> ± 0.904 | 0.162 |
| plasmid_lp54 | BB_A09   |              | <b>0.971</b> ± 0.505 | 0.857 | <b>1.605</b> ± 1.289 | 0.234 | <b>0.760</b> ± 0.384 | 0.333 | <b>1.139</b> ± 0.663 | 0.102 |
| plasmid_lp54 | BB_A10   |              | <b>1.046</b> ± 0.414 | 0.870 | <b>1.320</b> ± 0.559 | 0.417 | <b>0.737</b> ± 0.122 | 0.117 | <b>0.940</b> ± 0.427 | 0.836 |
| plasmid_lp54 | BB_A11   |              | <b>0.892</b> ± 0.370 | 0.274 | <b>1.391</b> ± 0.991 | 0.351 | <b>0.866</b> ± 0.377 | 0.097 | <b>1.050</b> ± 0.518 | 0.331 |
| plasmid_lp54 | BB_A13   |              | <b>0.951</b> ± 0.761 | 0.894 | <b>2.251</b> ± 1.099 | 0.120 | <b>0.832</b> ± 0.468 | 0.429 | <b>0.757</b> ± 0.495 | 0.300 |
| plasmid_lp54 | BB_A14   |              | <b>0.650</b> ± 0.234 | 0.138 | <b>0.739</b> ± 0.404 | 0.528 | <b>1.142</b> ± 0.354 | 0.557 | <b>1.110</b> ± 0.442 | 0.765 |
| plasmid_lp54 | BB_A23   |              | <b>0.762</b> ± 0.258 | 0.416 | <b>1.042</b> ± 0.381 | 0.898 | <b>0.603</b> ± 0.153 | 0.047 | <b>1.041</b> ± 0.262 | 0.839 |
| plasmid_lp54 | BB_A24   | <i>dbpA</i>  | <b>0.564</b> ± 0.283 | 0.143 | <b>1.281</b> ± 0.694 | 0.486 | <b>1.043</b> ± 0.446 | 0.836 | <b>1.288</b> ± 0.797 | 0.193 |
| plasmid_lp54 | BB_A25   | <i>dbpB</i>  | <b>0.919</b> ± 0.366 | 0.756 | <b>1.709</b> ± 1.217 | 0.436 | <b>0.623</b> ± 0.519 | 0.466 | <b>1.038</b> ± 0.333 | 0.758 |
| plasmid_lp54 | BB_A30   |              | <b>0.941</b> ± 0.404 | 0.215 | <b>1.527</b> ± 1.371 | 0.452 | <b>0.825</b> ± 0.288 | 0.428 | <b>1.215</b> ± 0.720 | 0.557 |
| plasmid_lp54 | BB_A31   |              | <b>0.854</b> ± 0.214 | 0.266 | <b>1.408</b> ± 0.563 | 0.118 | <b>0.789</b> ± 0.231 | 0.208 | <b>1.161</b> ± 0.314 | 0.378 |
| plasmid_lp54 | BB_A33   |              | <b>1.068</b> ± 0.776 | 0.909 | <b>2.397</b> ± 1.670 | 0.181 | <b>1.161</b> ± 0.558 | 0.313 | <b>2.011</b> ± 1.043 | 0.074 |
| plasmid_lp54 | BB_A34   |              | <b>0.616</b> ± 0.302 | 0.182 | <b>0.461</b> ± 0.377 | 0.341 | <b>0.795</b> ± 0.518 | 0.045 | <b>0.965</b> ± 0.627 | 0.334 |
| plasmid_lp54 | BB_A36   |              | <b>0.714</b> ± 0.350 | 0.019 | <b>1.423</b> ± 1.243 | 0.527 | <b>0.524</b> ± 0.256 | 0.039 | <b>0.885</b> ± 0.492 | 0.503 |
| plasmid_lp54 | BB_A38   |              | <b>1.447</b> ± 0.501 | 0.300 | <b>0.946</b> ± 0.416 | 0.866 | <b>0.490</b> ± 0.211 | 0.134 | <b>1.426</b> ± 0.508 | 0.039 |
| plasmid_lp54 | BB_A39   |              | <b>0.585</b> ± 0.190 | 0.106 | <b>1.218</b> ± 0.821 | 0.516 | <b>0.655</b> ± 0.248 | 0.028 | <b>0.844</b> ± 0.275 | 0.259 |
| plasmid_lp54 | BB_A40   |              | <b>0.347</b> ± 0.260 | 0.224 | <b>1.025</b> ± 0.750 | 0.969 | <b>0.569</b> ± 0.417 | 0.332 | <b>1.081</b> ± 0.923 | 0.738 |
| plasmid_lp54 | BB_A41   |              | <b>0.720</b> ± 0.125 | 0.110 | <b>1.271</b> ± 0.518 | 0.298 | <b>0.722</b> ± 0.126 | 0.090 | <b>1.088</b> ± 0.263 | 0.488 |
| plasmid_lp54 | BB_A42   |              | <b>0.760</b> ± 0.442 | 0.071 | <b>1.117</b> ± 0.516 | 0.657 | <b>0.984</b> ± 0.549 | 0.909 | <b>0.811</b> ± 0.572 | 0.545 |
| plasmid_lp54 | BB_A43   |              | <b>0.715</b> ± 0.431 | 0.184 | <b>1.195</b> ± 0.516 | 0.546 | <b>0.962</b> ± 0.507 | 0.827 | <b>0.888</b> ± 0.235 | 0.303 |
| plasmid_lp54 | BB_A44   |              | <b>1.111</b> ± 0.531 | 0.718 | <b>1.303</b> ± 1.133 | 0.660 | <b>0.842</b> ± 0.206 | 0.376 | <b>1.251</b> ± 0.251 | 0.017 |
| plasmid_lp54 | BB_A45   |              | <b>1.096</b> ± 0.465 | 0.435 | <b>1.681</b> ± 1.271 | 0.346 | <b>0.869</b> ± 0.232 | 0.257 | <b>1.001</b> ± 0.268 | 0.994 |
| plasmid_lp54 | BB_A46   |              | <b>0.714</b> ± 0.422 | 0.215 | <b>1.478</b> ± 1.138 | 0.161 | <b>0.718</b> ± 0.429 | 0.207 | <b>0.847</b> ± 0.549 | 0.302 |
| plasmid_lp54 | BB_A49   |              | <b>0.612</b> ± 0.296 | 0.157 | <b>1.173</b> ± 0.523 | 0.079 | <b>0.871</b> ± 0.273 | 0.513 | <b>0.935</b> ± 0.340 | 0.691 |
| plasmid_lp54 | BB_A50   |              | <b>0.893</b> ± 0.433 | 0.466 | <b>1.637</b> ± 1.483 | 0.353 | <b>0.755</b> ± 0.444 | 0.075 | <b>1.043</b> ± 0.659 | 0.503 |
| plasmid_lp54 | BB_A53   |              | <b>0.749</b> ± 0.237 | 0.307 | <b>1.019</b> ± 0.698 | 0.974 | <b>0.494</b> ± 0.296 | 0.065 | <b>0.681</b> ± 0.359 | 0.421 |
| plasmid_lp54 | BB_A55   |              | <b>0.768</b> ± 1.125 | 0.767 | <b>1.698</b> ± 1.674 | 0.464 | <b>0.731</b> ± 1.050 | 0.775 | <b>2.588</b> ± 2.945 | 0.067 |
| plasmid_lp54 | BB_A56   |              | <b>0.882</b> ± 0.640 | 0.584 | <b>1.634</b> ± 1.517 | 0.354 | <b>0.722</b> ± 0.500 | 0.271 | <b>1.082</b> ± 0.511 | 0.674 |
| plasmid_lp54 | BB_A57   |              | <b>0.799</b> ± 0.557 | 0.098 | <b>1.729</b> ± 1.597 | 0.374 | <b>0.789</b> ± 0.507 | 0.067 | <b>0.883</b> ± 0.539 | 0.524 |
| plasmid_lp54 | BB_A59   |              | <b>0.760</b> ± 0.158 | 0.180 | <b>0.636</b> ± 0.586 | 0.394 | <b>1.113</b> ± 0.422 | 0.463 | <b>0.936</b> ± 0.229 | 0.721 |
| plasmid_lp54 | BB_A60   |              | <b>0.949</b> ± 0.251 | 0.275 | <b>1.643</b> ± 1.398 | 0.448 | <b>0.813</b> ± 0.237 | 0.474 | <b>1.068</b> ± 0.260 | 0.444 |
| plasmid_lp54 | BB_A61   |              | <b>0.788</b> ± 0.164 | 0.073 | <b>1.251</b> ± 0.231 | 0.172 | <b>0.639</b> ± 0.340 | 0.106 | <b>0.925</b> ± 0.190 | 0.326 |
| plasmid_lp54 | BB_A64   |              | <b>0.901</b> ± 0.570 | 0.142 | <b>1.557</b> ± 1.392 | 0.421 | <b>0.815</b> ± 0.353 | 0.316 | <b>1.273</b> ± 0.693 | 0.092 |
| plasmid_lp54 | BB_A65   |              | <b>0.869</b> ± 0.347 | 0.434 | <b>1.485</b> ± 0.978 | 0.211 | <b>0.818</b> ± 0.332 | 0.292 | <b>1.054</b> ± 0.417 | 0.691 |
| plasmid_lp54 | BB_A66   |              | <b>0.665</b> ± 0.208 | 0.183 | <b>1.345</b> ± 0.997 | 0.531 | <b>0.795</b> ± 0.261 | 0.458 | <b>0.837</b> ± 0.250 | 0.532 |
| plasmid_lp54 | BB_A68   | <i>cspA</i>  | <b>1.017</b> ± 0.479 | 0.952 | <b>1.359</b> ± 0.593 | 0.380 | <b>0.806</b> ± 0.161 | 0.079 | <b>1.049</b> ± 0.129 | 0.653 |
| plasmid_lp54 | BB_A69   |              | <b>1.692</b> ± 0.578 | 0.184 | <b>2.971</b> ± 2.254 | 0.213 | <b>1.447</b> ± 1.005 | 0.459 | <b>0.781</b> ± 0.362 | 0.450 |
| plasmid_lp54 | BB_A70   |              | <b>0.392</b> ± 0.183 | 0.166 | <b>0.591</b> ± 0.402 | 0.428 | <b>0.876</b> ± 0.393 | 0.417 | <b>0.931</b> ± 0.494 | 0.516 |
| plasmid_lp54 | BB_A71   |              | <b>0.992</b> ± 0.396 | 0.973 | <b>1.135</b> ± 0.272 | 0.061 | <b>0.779</b> ± 0.235 | 0.350 | <b>0.771</b> ± 0.224 | 0.376 |
| plasmid_lp54 | BB_A73   |              | <b>1.027</b> ± 0.404 | 0.803 | <b>1.083</b> ± 0.625 | 0.625 | <b>0.764</b> ± 0.344 | 0.536 | <b>0.863</b> ± 0.383 | 0.196 |
| plasmid_lp54 | BB_A74   | <i>osm28</i> | <b>1.146</b> ± 0.417 | 0.176 | <b>1.827</b> ± 1.366 | 0.322 | <b>0.825</b> ± 0.246 | 0.021 | <b>1.111</b> ± 0.408 | 0.242 |
| plasmid_lp54 | BB_A76   | <i>thyX</i>  | <b>1.240</b> ± 1.170 | 0.201 | <b>0.310</b> ± 0.384 | 0.367 | <b>0.041</b> ± 0.077 | 0.147 | <b>0.191</b> ± 0.231 | 0.275 |
| plasmid_lp56 | BB_Q0091 |              | <b>4.684</b> ± 3.528 | 0.045 | <b>0.772</b> ± 0.666 | 0.363 | <b>1.870</b> ± 1.995 | 0.531 | <b>0.793</b> ± 0.497 | 0.597 |
| plasmid_lp56 | BB_Q01   |              | <b>1.268</b> ± 1.085 | 0.588 | <b>1.768</b> ± 1.279 | 0.276 | <b>0.739</b> ± 0.805 | 0.516 | <b>0.727</b> ± 0.347 | 0.475 |
| plasmid_lp56 | BB_Q03   |              | <b>0.812</b> ± 0.767 | 0.659 | <b>1.250</b> ± 1.361 | 0.274 | <b>0.572</b> ± 0.519 | 0.437 | <b>0.724</b> ± 0.699 | 0.629 |
| plasmid_lp56 | BB_Q12   |              | <b>1.393</b> ± 0.372 | 0.174 | <b>0.885</b> ± 0.653 | 0.812 | <b>1.581</b> ± 0.638 | 0.310 | <b>1.470</b> ± 0.736 | 0.406 |
| plasmid_lp56 | BB_Q13   |              | <b>2.325</b> ± 0.543 | 0.018 | <b>1.294</b> ± 0.400 | 0.392 | <b>0.973</b> ± 0.335 | 0.728 | <b>1.008</b> ± 0.314 | 0.720 |
| plasmid_lp56 | BB_Q14   |              | <b>0.752</b> ± 0.408 | 0.532 | <b>0.835</b> ± 0.586 | 0.638 | <b>0.758</b> ± 0.395 | 0.539 | <b>0.846</b> ± 0.475 | 0.737 |
| plasmid_lp56 | BB_Q15   |              | <b>1.807</b> ± 0.528 | 0.046 | <b>1.166</b> ± 0.699 | 0.658 | <b>0.907</b> ± 0.245 | 0.183 | <b>1.168</b> ± 0.429 | 0.267 |
| plasmid_lp56 | BB_Q16   |              | <b>2.335</b> ± 1.152 | 0.107 | <b>1.127</b> ± 0.951 | 0.781 | <b>0.874</b> ± 0.260 | 0.068 | <b>0.918</b> ± 0.234 | 0.379 |
| plasmid_lp56 | BB_Q17   |              | <b>1.350</b> ± 0.448 | 0.132 | <b>0.894</b> ± 0.198 | 0.394 | <b>0.829</b> ± 0.242 | 0.116 | <b>0.996</b> ± 0.274 | 0.928 |
| plasmid_lp56 | BB_Q18   |              | <b>2.186</b> ± 1.195 | 0.053 | <b>2.007</b> ± 1.890 | 0.325 | <b>1.135</b> ± 0.511 | 0.195 | <b>1.058</b> ± 0.432 | 0.702 |
| plasmid_lp56 | BB_Q19   |              | <b>2.120</b> ± 0.567 | 0.067 | <b>1.902</b> ± 1.732 | 0.453 | <b>0.973</b> ± 0.118 | 0.737 | <b>0.971</b> ± 0.157 | 0.660 |
| plasmid_lp56 | BB_Q20   |              | <b>4.448</b> ± 1.597 | 0.066 | <b>2.670</b> ± 0.718 | 0.055 | <b>1.776</b> ± 0.663 | 0.169 | <b>1.768</b> ± 0.145 | 0.015 |
| plasmid_lp56 | BB_Q21   |              | <b>1.898</b> ± 0.632 | 0.007 | <b>1.638</b> ± 1.269 | 0.334 | <b>1.270</b> ± 0.470 | 0.413 | <b>1.109</b> ± 0.407 | 0.163 |
| plasmid_lp56 | BB_Q22   |              | <b>2.587</b> ± 0.817 | 0.016 | <b>1.713</b> ± 1.229 | 0.320 | <b>1.059</b> ± 0.296 | 0.660 | <b>1.224</b> ± 0.319 | 0.028 |
| plasmid_lp56 | BB_Q23   |              | <b>1.879</b> ± 0.815 | 0.177 | <b>0.757</b> ± 1.014 | 0.321 | <b>0.577</b> ± 0.247 | 0.148 | <b>0.711</b> ± 0.312 | 0.242 |
| plasmid_lp56 | BB_Q24   |              | <b>1.890</b> ± 1.118 | 0.035 | <b>0.513</b> ± 0.356 | 0.359 | <b>0.975</b> ± 0.520 | 0.871 | <b>1.048</b> ± 0.587 | 0.590 |
| plasmid_lp56 | BB_Q25   |              | <b>2.230</b> ± 0.641 | 0.024 | <b>1.966</b> ± 1.640 | 0.370 | <b>1.062</b> ± 0.259 | 0.582 | <b>1.186</b> ± 0.218 | 0.260 |
| plasmid_lp56 | BB_Q26   |              | <b>2.537</b> ± 0.616 | 0.043 | <b>1.756</b> ± 0.623 | 0.131 | <b>1.369</b> ± 0.592 | 0.434 | <b>1.753</b> ± 0.588 | 0.173 |

|              |        |             |                      |       |                      |       |                      |       |                      |       |
|--------------|--------|-------------|----------------------|-------|----------------------|-------|----------------------|-------|----------------------|-------|
| plasmid_lp56 | BB_Q27 |             | <b>1.847</b> ± 1.216 | 0.088 | <b>0.810</b> ± 0.365 | 0.533 | <b>1.031</b> ± 0.608 | 0.426 | <b>1.046</b> ± 0.603 | 0.497 |
| plasmid_lp56 | BB_Q28 |             | <b>1.945</b> ± 0.944 | 0.020 | <b>0.756</b> ± 0.364 | 0.194 | <b>0.846</b> ± 0.405 | 0.228 | <b>1.010</b> ± 0.520 | 0.957 |
| plasmid_lp56 | BB_Q29 |             | <b>2.268</b> ± 0.409 | 0.007 | <b>1.337</b> ± 0.563 | 0.320 | <b>0.989</b> ± 0.180 | 0.354 | <b>1.032</b> ± 0.292 | 0.723 |
| plasmid_lp56 | BB_Q30 | <i>blyA</i> | <b>1.126</b> ± 0.469 | 0.178 | <b>0.487</b> ± 0.361 | 0.309 | <b>0.923</b> ± 0.381 | 0.474 | <b>0.993</b> ± 0.445 | 0.881 |
| plasmid_lp56 | BB_Q31 | <i>blyB</i> | <b>2.432</b> ± 1.365 | 0.107 | <b>1.368</b> ± 0.788 | 0.530 | <b>0.966</b> ± 0.674 | 0.876 | <b>0.768</b> ± 0.259 | 0.419 |
| plasmid_lp56 | BB_Q32 |             | <b>2.304</b> ± 1.104 | 0.073 | <b>1.706</b> ± 1.449 | 0.383 | <b>0.961</b> ± 0.400 | 0.749 | <b>1.057</b> ± 0.398 | 0.459 |
| plasmid_lp56 | BB_Q33 |             | <b>1.141</b> ± 0.459 | 0.385 | <b>0.635</b> ± 0.504 | 0.241 | <b>1.009</b> ± 0.640 | 0.970 | <b>1.161</b> ± 0.547 | 0.089 |
| plasmid_lp56 | BB_Q34 | <i>bdrW</i> | <b>1.885</b> ± 1.295 | 0.310 | <b>1.122</b> ± 0.692 | 0.610 | <b>0.982</b> ± 0.627 | 0.971 | <b>1.230</b> ± 0.715 | 0.674 |
| plasmid_lp56 | BB_Q37 |             | <b>1.091</b> ± 0.547 | 0.056 | <b>1.015</b> ± 0.402 | 0.962 | <b>1.228</b> ± 0.441 | 0.453 | <b>1.109</b> ± 0.407 | 0.641 |
| plasmid_lp56 | BB_Q39 |             | <b>2.589</b> ± 1.319 | 0.126 | <b>1.998</b> ± 1.175 | 0.239 | <b>1.359</b> ± 0.981 | 0.567 | <b>0.982</b> ± 1.087 | 0.982 |
| plasmid_lp56 | BB_Q43 | <i>bppA</i> | <b>1.430</b> ± 0.584 | 0.028 | <b>1.120</b> ± 0.611 | 0.498 | <b>0.921</b> ± 0.326 | 0.496 | <b>1.122</b> ± 0.416 | 0.026 |
| plasmid_lp56 | BB_Q44 | <i>bppB</i> | <b>1.800</b> ± 0.755 | 0.198 | <b>1.467</b> ± 1.222 | 0.572 | <b>0.828</b> ± 0.383 | 0.528 | <b>1.162</b> ± 0.383 | 0.543 |
| plasmid_lp56 | BB_Q45 | <i>bppC</i> | <b>3.391</b> ± 2.290 | 0.114 | <b>2.151</b> ± 2.415 | 0.407 | <b>0.687</b> ± 0.272 | 0.196 | <b>0.945</b> ± 0.359 | 0.838 |
| plasmid_lp56 | BB_Q48 |             | <b>3.521</b> ± 1.109 | 0.039 | <b>2.532</b> ± 2.899 | 0.437 | <b>0.974</b> ± 0.303 | 0.836 | <b>1.955</b> ± 0.916 | 0.166 |
| plasmid_lp56 | BB_Q49 |             | <b>1.188</b> ± 0.549 | 0.269 | <b>0.485</b> ± 0.282 | 0.206 | <b>0.877</b> ± 0.279 | 0.125 | <b>0.949</b> ± 0.362 | 0.055 |
| plasmid_lp56 | BB_Q50 |             | <b>1.915</b> ± 1.131 | 0.001 | <b>0.958</b> ± 0.568 | 0.797 | <b>0.826</b> ± 0.459 | 0.509 | <b>0.949</b> ± 0.524 | 0.806 |
| plasmid_lp56 | BB_Q51 |             | <b>1.893</b> ± 0.689 | 0.164 | <b>1.449</b> ± 0.874 | 0.481 | <b>1.030</b> ± 0.189 | 0.799 | <b>1.168</b> ± 0.235 | 0.380 |
| plasmid_lp56 | BB_Q52 |             | <b>1.609</b> ± 0.519 | 0.130 | <b>1.198</b> ± 0.730 | 0.647 | <b>0.976</b> ± 0.162 | 0.556 | <b>0.981</b> ± 0.110 | 0.830 |
| plasmid_lp56 | BB_Q53 |             | <b>1.641</b> ± 1.130 | 0.199 | <b>1.309</b> ± 0.658 | 0.022 | <b>0.833</b> ± 0.354 | 0.397 | <b>1.022</b> ± 0.510 | 0.929 |
| plasmid_lp56 | BB_Q54 |             | <b>2.872</b> ± 0.475 | 0.007 | <b>1.675</b> ± 0.988 | 0.333 | <b>0.978</b> ± 0.482 | 0.952 | <b>0.981</b> ± 0.167 | 0.898 |
| plasmid_lp56 | BB_Q55 |             | <b>2.554</b> ± 1.297 | 0.060 | <b>1.660</b> ± 1.742 | 0.523 | <b>0.632</b> ± 0.213 | 0.174 | <b>0.729</b> ± 0.327 | 0.355 |
| plasmid_lp56 | BB_Q85 |             | <b>1.412</b> ± 1.207 | 0.145 | <b>1.077</b> ± 0.956 | 0.461 | <b>0.842</b> ± 0.699 | 0.751 | <b>0.856</b> ± 0.744 | 0.675 |
| plasmid_lp56 | BB_Q88 |             | <b>1.637</b> ± 1.301 | 0.419 | <b>2.724</b> ± 2.654 | 0.344 | <b>0.906</b> ± 0.303 | 0.400 | <b>1.101</b> ± 0.452 | 0.570 |

<sup>a</sup> Samples with >10 sequences in all 3 glucose cultures

<sup>b</sup> % of total reads following growth in specified carbohydrate/% total reads following growth in glucose

<sup>c</sup> p-value was obtained using a Ttest

<sup>d</sup> A fitness value of 0 indicates that insertions in this gene were not present in the population following growth in GlcNAc

Table S3. Fitness values of all transposon insertions identified in the carbohydrate Tn-seq screen<sup>a</sup>

| Location   | Position | Locus   | Gene        | GlcNAc                            |                      | Maltose              |         | Mannose              |         | Trehalose            |         | Sequence obtained in the Tn-seq                       |
|------------|----------|---------|-------------|-----------------------------------|----------------------|----------------------|---------|----------------------|---------|----------------------|---------|-------------------------------------------------------|
|            |          |         |             | Fitness Value <sup>b</sup>        | p-value <sup>c</sup> | Fitness Value        | p-value | Fitness Value        | p-value | Fitness Value        | p-value |                                                       |
| chromosome | 604      | BB_0001 |             | <b>0.903</b> ± 0.386              | 0.481                | <b>1.320</b> ± 0.620 | 0.524   | <b>0.539</b> ± 0.204 | 0.164   | <b>0.715</b> ± 0.355 | 0.284   | GTATTACTATAAAATTATCGACTTCTTTAAAGAATTTATCCTTTAGATC     |
| chromosome | 1084     | BB_0002 |             | <b>1.100</b> ± 1.390              | 0.910                | <b>1.790</b> ± 2.529 | 0.006   | <b>1.002</b> ± 1.467 | 0.996   | <b>1.642</b> ± 2.222 | 0.544   | GTTGTTCCCTAATCCAGGAAATGTTTGATTGCCGAAAATACCTCATT       |
| chromosome | 15805    | IG 1    |             | <b>1.069</b> ± 0.605              | 0.649                | <b>0.972</b> ± 0.662 | 0.962   | <b>1.023</b> ± 0.453 | 0.848   | <b>1.236</b> ± 0.677 | 0.319   | AATTACTAGCTTGTAGCTTAAAGTGGCTCTAACATTAAGATGAAAAAGAA    |
| chromosome | 15914    | IG 2    |             | <b>0.441</b> ± 0.210              | 0.174                | <b>0.685</b> ± 0.499 | 0.432   | <b>0.832</b> ± 0.538 | 0.368   | <b>1.077</b> ± 0.601 | 0.512   | ATAAAAAAATAAAGACTATACTAAAAATCCTAAATTAATTTGATAGC       |
| chromosome | 15930    | IG 3    |             | <b>0.598</b> ± 0.344              | 0.202                | <b>0.447</b> ± 0.263 | 0.265   | <b>0.957</b> ± 0.758 | 0.723   | <b>0.975</b> ± 0.764 | 0.724   | GTCTTAAATTTTTTATTAGTATTAGTAATAATAGTTTGAGTTTTTTTTTA    |
| chromosome | 15935    | IG 4    |             | <b>0.922</b> ± 1.574              | 0.951                | <b>0.797</b> ± 1.200 | 0.859   | <b>1.880</b> ± 2.194 | 0.326   | <b>2.331</b> ± 2.859 | 0.438   | ACTAAAAATCCTAAATTAATTTGATAGCACAATACAATAAATTTAGGA      |
| chromosome | 15939    | IG 5    |             | <b>0.176</b> ± 0.207              | 0.214                | <b>0.243</b> ± 0.445 | 0.248   | <b>0.668</b> ± 0.623 | 0.462   | <b>0.281</b> ± 0.214 | 0.170   | AAAATCCTAAATTAATTTGATAGCACAATACAATAAATTTAGGATCTG      |
| chromosome | 16023    | BB_0017 |             | <b>0.681</b> ± 0.384              | 0.226                | <b>0.616</b> ± 0.374 | 0.446   | <b>0.913</b> ± 0.602 | 0.383   | <b>0.984</b> ± 0.619 | 0.884   | TTCTCATGGACTTCTAGTGGGGGAATGGGGGCATTTCAATAGCTAC        |
| chromosome | 16167    | BB_0017 |             | <b>0.724</b> ± 0.223              | 0.066                | <b>0.595</b> ± 0.382 | 0.163   | <b>0.905</b> ± 0.347 | 0.778   | <b>1.072</b> ± 0.412 | 0.822   | TAATTCAAAGTTGGATTCCAATGGGATTATTTCTATTATCATAAACCACT    |
| chromosome | 16198    | BB_0017 |             | <b>0.671</b> ± 0.528              | 0.050                | <b>0.198</b> ± 0.204 | 0.154   | <b>0.867</b> ± 0.711 | 0.810   | <b>0.653</b> ± 0.454 | 0.537   | TTCTATTATCATAAACCACTCCAGTTTTTACAAAATAAATACATCTTAA     |
| chromosome | 16241    | BB_0017 |             | <b>0.857</b> ± 1.186              | 0.857                | <b>0.354</b> ± 0.371 | 0.167   | <b>0.804</b> ± 0.982 | 0.764   | <b>0.621</b> ± 0.372 | 0.326   | CATCTAATGATATGATGCTGTATCAATACTAGCTGGACTTATTTCTGGA     |
| chromosome | 16245    | BB_0017 |             | <b>1.937</b> ± 1.329              | 0.092                | <b>1.292</b> ± 0.856 | 0.403   | <b>1.278</b> ± 1.302 | 0.534   | <b>2.191</b> ± 1.766 | 0.206   | AGATGATTTTTATTTGTAAAACTGGGAGTGGTTATGATAATAGAATAT      |
| chromosome | 16265    | BB_0017 |             | <b>0.444</b> ± 0.548              | 0.528                | <b>0.189</b> ± 0.339 | 0.403   | <b>0.481</b> ± 0.804 | 0.272   | <b>0.813</b> ± 1.024 | 0.716   | TCAATACTAGCTGACTTATTTCTGGACTTGGCTTGGCTAATATTTAAG      |
| chromosome | 16271    | BB_0017 |             | <b>0.658</b> ± 0.281              | 0.276                | <b>0.726</b> ± 0.597 | 0.578   | <b>0.863</b> ± 0.268 | 0.567   | <b>0.839</b> ± 0.354 | 0.031   | CTAGCTGGACTTATTTCTGGACTTGGCTTGGCTAATATTTAAGGGCAAA     |
| chromosome | 16341    | BB_0017 |             | <b>0.800</b> ± 0.422              | 0.594                | <b>0.692</b> ± 0.383 | 0.444   | <b>1.209</b> ± 0.363 | 0.341   | <b>1.213</b> ± 1.016 | 0.690   | TCTGATCCCCCTGAAGATCCTTTGCCCTTAAATATTAGCCCAAGCCCAAGT   |
| chromosome | 16350    | BB_0017 |             | <b>1.481</b> ± 1.584              | 0.350                | <b>0.243</b> ± 0.484 | 0.173   | <b>0.763</b> ± 1.035 | 0.778   | <b>1.240</b> ± 1.821 | 0.835   | GCAATTATCTGATCCCCCTGAAGATCCTTTGCCCTTAAATATTAGCCCA     |
| chromosome | 16359    | BB_0017 |             | <b>1.252</b> ± 0.826              | 0.599                | <b>0.234</b> ± 0.297 | 0.113   | <b>1.150</b> ± 1.144 | 0.869   | <b>1.202</b> ± 0.787 | 0.554   | ATGATCATAGCAATTATCTGATCCCCCTGAAGATCCTTTGCCCTTAAAT     |
| chromosome | 16407    | BB_0017 |             | <b>0.721</b> ± 0.161              | 0.062                | <b>0.892</b> ± 1.177 | 0.891   | <b>0.604</b> ± 0.652 | 0.414   | <b>1.097</b> ± 1.055 | 0.885   | ATCTTGTGGTATTAATACTGGCAACCTTTTCTTAAATTTGAAATCGCTC     |
| chromosome | 16469    | BB_0017 |             | <b>1.183</b> ± 1.475              | 0.874                | <b>0.278</b> ± 0.386 | 0.444   | <b>2.379</b> ± 2.980 | 0.307   | <b>0.938</b> ± 1.350 | 0.653   | ATAGCATCATTTGTAACATCTATCATGACAGATAAAAACAAGTACTGGATTT  |
| chromosome | 16610    | BB_0017 |             | <b>0.000</b> ± 0.000 <sup>d</sup> | 0.038                | <b>0.694</b> ± 0.424 | 0.236   | <b>0.997</b> ± 0.198 | 0.248   | <b>0.831</b> ± 0.296 | 0.716   | ATAGACGGAAAAGTCTTGGCAGGAACAGAAAAAATATAGTATTTATA       |
| chromosome | 16610    | BB_0017 |             | <b>0.668</b> ± 0.230              | 0.145                | <b>0.299</b> ± 0.528 | 0.419   | <b>0.317</b> ± 0.530 | 0.982   | <b>1.164</b> ± 0.952 | 0.171   | TTAATGTAGCGGCTAATTTTAACTGTTGTGAAGAAGATAAGCAATTTCTT    |
| chromosome | 16655    | BB_0017 |             | <b>0.384</b> ± 0.270              | 0.075                | <b>0.595</b> ± 0.295 | 0.265   | <b>0.843</b> ± 0.609 | 0.570   | <b>0.670</b> ± 0.531 | 0.148   | TTTATAGTAGTCCAATAATGCGTTTATCAAGAATTAATATATATACAAA     |
| chromosome | 16659    | BB_0017 |             | <b>0.695</b> ± 0.264              | 0.190                | <b>0.630</b> ± 0.487 | 0.476   | <b>1.043</b> ± 0.474 | 0.490   | <b>1.015</b> ± 0.410 | 0.814   | TAGTAGTCCAATAATGCGTTTATCAAGAATTAATATATATACAAAAAAG     |
| chromosome | 16661    | BB_0017 |             | <b>0.396</b> ± 0.152              | 0.088                | <b>0.570</b> ± 0.513 | 0.405   | <b>0.953</b> ± 0.294 | 0.857   | <b>0.969</b> ± 0.265 | 0.846   | CTATAAATACTATAGTTTTTCTGTTCTGCCAAGCACCTTTCCGCTA        |
| chromosome | 16661    | BB_0017 |             | <b>0.676</b> ± 0.469              | 0.103                | <b>0.783</b> ± 0.499 | 0.679   | <b>1.046</b> ± 0.701 | 0.595   | <b>1.281</b> ± 0.954 | 0.159   | GTAGTCCAATAATGCGTTTATCAAGAATTAATATATATACAAAAAAGT      |
| chromosome | 16689    | BB_0017 |             | <b>0.299</b> ± 0.505              | 0.008                | <b>0.160</b> ± 0.271 | 0.008   | <b>0.627</b> ± 0.498 | 0.020   | <b>0.774</b> ± 0.951 | 0.535   | ATTCTTGATAAACGCATTATTTGAACTACTATAAATACTATAGTTTTTCT    |
| chromosome | 20058    | BB_0021 | <i>queA</i> | <b>0.598</b> ± 0.322              | 0.012                | <b>0.734</b> ± 0.306 | 0.227   | <b>0.955</b> ± 0.475 | 0.693   | <b>0.979</b> ± 0.569 | 0.941   | TTATTTAGAATTAACATAGCATCCCAATAAGAAAAAATTTAACTTTTA      |
| chromosome | 20314    | BB_0021 | <i>queA</i> | <b>0.973</b> ± 0.897              | 0.972                | <b>2.559</b> ± 1.893 | 0.258   | <b>0.797</b> ± 0.716 | 0.743   | <b>0.803</b> ± 0.763 | 0.713   | GAGTCATCTTATGATAAATAACCTTAAGAAATTTAAAAACAGGTCAGCAAAGT |
| chromosome | 20888    | BB_0021 | <i>queA</i> | <b>0.829</b> ± 0.568              | 0.548                | <b>1.764</b> ± 1.114 | 0.055   | <b>1.150</b> ± 1.045 | 0.790   | <b>1.364</b> ± 0.882 | 0.546   | TTCTTGATTTCTAGCTTTGAGTTATTAATAAATACTACTATTTATATAT     |
| chromosome | 20933    | BB_0021 | <i>queA</i> | <b>0.613</b> ± 0.578              | 0.460                | <b>0.523</b> ± 0.536 | 0.398   | <b>0.534</b> ± 0.273 | 0.195   | <b>0.928</b> ± 0.311 | 0.810   | TATATTTAAAAATTTGTTTACAGAATTTTTATGGTAAATTTTTTGCAATT    |
| chromosome | 21111    | BB_0022 | <i>ruvB</i> | <b>0.996</b> ± 0.929              | 0.969                | <b>2.040</b> ± 1.832 | 0.330   | <b>1.231</b> ± 1.502 | 0.786   | <b>1.227</b> ± 1.609 | 0.767   | AACTTAGAGATGAAAGAGGATGGTCTTAATGAAAACCAAGAGTTTCATTT    |
| chromosome | 21547    | BB_0022 | <i>ruvB</i> | <b>1.131</b> ± 0.429              | 0.622                | <b>0.745</b> ± 0.529 | 0.541   | <b>0.922</b> ± 0.272 | 0.685   | <b>1.190</b> ± 0.253 | 0.172   | AAGTTCAAATCTTGCAGTAATTTCCAATCTCGCATAAAGTGGAGATGTTAC   |
| chromosome | 22001    | BB_0022 | <i>ruvB</i> | <b>0.858</b> ± 0.318              | 0.042                | <b>1.329</b> ± 0.803 | 0.374   | <b>0.679</b> ± 0.172 | 0.136   | <b>0.887</b> ± 0.304 | 0.168   | AAGGTCAGGTTAATGTTAAAGAAACCCCTTAGTATTTTATAAGAGCTTCTA   |
| chromosome | 22025    | BB_0022 | <i>ruvB</i> | <b>0.676</b> ± 0.597              | 0.084                | <b>0.587</b> ± 0.528 | 0.053   | <b>0.666</b> ± 0.362 | 0.099   | <b>1.046</b> ± 0.521 | 0.830   | GGCCTAAAGTTTTGAAGATTTAAAGGTCAGGTTAATGTTAAAGAAACCC     |
| chromosome | 22466    | BB_0023 | <i>ruvA</i> | <b>0.462</b> ± 0.393              | 0.281                | <b>0.197</b> ± 0.217 | 0.267   | <b>0.605</b> ± 0.590 | 0.231   | <b>0.721</b> ± 0.688 | 0.290   | TATTGGATAACACTCTTAAAGCGGCCCTTGGGCCTACTCCGCTTACTCCA    |
| chromosome | 22468    | BB_0023 | <i>ruvA</i> | <b>0.842</b> ± 0.382              | 0.293                | <b>1.346</b> ± 0.880 | 0.229   | <b>0.810</b> ± 0.332 | 0.371   | <b>0.894</b> ± 0.430 | 0.313   | TTGGATAACACTCTTAAAGCGGCCCTTGGGCCTACTCCGCTTACTCCAATA   |
| chromosome | 22600    | BB_0023 | <i>ruvA</i> | <b>0.783</b> ± 0.313              | 0.127                | <b>1.200</b> ± 0.773 | 0.546   | <b>0.669</b> ± 0.215 | 0.036   | <b>0.851</b> ± 0.307 | 0.095   | TAATACTCAACTTTGTCTGCAAAATTAATAATTTAGCAAGGCAAAATGACTA  |
| chromosome | 22797    | IG 6    |             | <b>0.734</b> ± 0.270              | 0.296                | <b>1.111</b> ± 0.618 | 0.803   | <b>0.532</b> ± 0.097 | 0.034   | <b>0.598</b> ± 0.094 | 0.041   | AGGCTTTGCTTTAAATGTTGAATGTTCTGTGTAATATAATTTATAATT      |
| chromosome | 22856    | BB_0024 |             | <b>0.656</b> ± 0.207              | 0.217                | <b>0.539</b> ± 0.431 | 0.288   | <b>0.692</b> ± 0.231 | 0.127   | <b>0.848</b> ± 0.595 | 0.688   | ATTAATGAAAATAGCTATTTAAAAATTTGATTTTTTCAATTTAGTGCTTTTT  |
| chromosome | 23008    | BB_0024 |             | <b>1.134</b> ± 0.221              | 0.390                | <b>1.406</b> ± 0.348 | 0.206   | <b>0.610</b> ± 0.353 | 0.294   | <b>0.918</b> ± 0.802 | 0.848   | TTCATAGGATCTGGAAGCACTTTTGATCTTTGTAACAAAAACAGAAAA      |
| chromosome | 23099    | BB_0024 |             | <b>2.057</b> ± 2.091              | 0.082                | <b>1.823</b> ± 2.397 | 0.429   | <b>1.121</b> ± 1.379 | 0.843   | <b>1.535</b> ± 1.562 | 0.472   | TGATTTGGGATAATAAATCTACATATCTTCTGTCGATAAATATATG        |
| chromosome | 23185    | BB_0024 |             | <b>0.618</b> ± 0.428              | 0.264                | <b>1.985</b> ± 1.397 | 0.270   | <b>1.156</b> ± 0.710 | 0.781   | <b>0.989</b> ± 0.671 | 0.982   | TGCTTTTATTAATTTCTTTTACATTTTTAACTACATATATTTTATCGA      |
| chromosome | 23630    | BB_0024 |             | <b>0.800</b> ± 0.095              | 0.062                | <b>1.046</b> ± 0.521 | 0.874   | <b>0.740</b> ± 0.087 | 0.058   | <b>0.878</b> ± 0.120 | 0.326   | TTACGAACCTCCGCACATGAGCTCCACTTGAATACACTTTTACCGGG       |
| chromosome | 23700    | BB_0024 |             | <b>1.435</b> ± 1.069              | 0.249                | <b>2.309</b> ± 2.780 | 0.320   | <b>0.870</b> ± 0.638 | 0.744   | <b>1.341</b> ± 1.017 | 0.283   | TTCTTTGGAAAGTATTTCCCGGTAAGGTATTCCAAGTGGAGCTAC         |
| chromosome | 23719    | BB_0024 |             | <b>0.477</b> ± 0.442              | 0.352                | <b>0.410</b> ± 0.385 | 0.305   | <b>0.485</b> ± 0.571 | 0.443   | <b>1.140</b> ± 1.309 | 0.777   | TGAATAATTTATTTATGATTTCTTTGGAAAGTATTTCCCGGTAAGGT       |

|            |        |         |             |                            |                            |                            |                            |                                                      |
|------------|--------|---------|-------------|----------------------------|----------------------------|----------------------------|----------------------------|------------------------------------------------------|
| chromosome | 23934  | BB_0024 |             | <b>0.337</b> ± 0.371 0.422 | <b>0.733</b> ± 1.316 0.271 | <b>0.187</b> ± 0.247 0.227 | <b>0.301</b> ± 0.323 0.327 | CAGAGTTTACTACGAAAAGATTTAAATAAACTAACTAATCTCTGCGGA     |
| chromosome | 40220  | BB_0040 | <i>cheR</i> | <b>0.528</b> ± 0.202 0.157 | <b>0.331</b> ± 0.269 0.190 | <b>0.727</b> ± 0.349 0.126 | <b>0.808</b> ± 0.469 0.111 | TAAGGCTCTCCACCCTTGAACAGCCAGCTGACCATATTTCAATTTCTGAG   |
| chromosome | 41593  | BB_0043 |             | <b>1.263</b> ± 0.571 0.544 | <b>1.790</b> ± 1.200 0.421 | <b>0.804</b> ± 0.316 0.456 | <b>0.942</b> ± 0.573 0.245 | TTTGTGGGAAAACCTTTATGAGTCTGAGAGCAAGCATAAAGATTTTTAAA   |
| chromosome | 42362  | BB_0043 |             | <b>1.056</b> ± 0.907 0.695 | <b>1.910</b> ± 3.262 0.637 | <b>1.241</b> ± 1.344 0.829 | <b>0.866</b> ± 0.632 0.626 | TCTACCTCCACTACTAAAATCAAGCTCATACGAATCGGTGACTTTAA      |
| chromosome | 43859  | BB_0045 |             | <b>0.754</b> ± 0.471 0.608 | <b>0.849</b> ± 0.485 0.712 | <b>0.767</b> ± 0.549 0.403 | <b>0.860</b> ± 0.522 0.759 | CCATCTATAAGTTTAAATTCATCCAATTTTTAACTTAGAAAGCTCTATA    |
| chromosome | 45429  | IG 7    |             | <b>0.973</b> ± 0.580 0.875 | <b>1.436</b> ± 1.066 0.385 | <b>0.735</b> ± 0.504 0.066 | <b>1.086</b> ± 0.630 0.677 | AAATATTTTTATTATTATAATGAAATTTGATAGATTTATCAGTAATGGT    |
| chromosome | 45613  | BB_0046 | <i>rnhB</i> | <b>0.297</b> ± 0.174 0.049 | <b>0.703</b> ± 0.197 0.201 | <b>0.591</b> ± 0.585 0.407 | <b>1.391</b> ± 1.028 0.531 | TGAGTTTTCAAGTATAATGAGGATAGGTACTCTCTTTTTCTTTTTTTAG    |
| chromosome | 45660  | BB_0046 | <i>rnhB</i> | <b>0.457</b> ± 0.389 0.243 | <b>0.580</b> ± 0.503 0.400 | <b>0.588</b> ± 0.139 0.041 | <b>0.943</b> ± 0.234 0.272 | TTTATTTTTCTATTGTTATATTTGAAATTCAGCAAATGCATAATATGAG    |
| chromosome | 45737  | BB_0046 | <i>rnhB</i> | <b>0.974</b> ± 0.368 0.887 | <b>1.483</b> ± 1.358 0.477 | <b>0.532</b> ± 0.413 0.040 | <b>0.996</b> ± 0.914 0.991 | GATGGCAAATTTGTACCCAAAATAACAGCAAAAAATGTTAAAGCAATAAT   |
| chromosome | 47204  | BB_0050 |             | <b>0.047</b> ± 0.056 0.229 | <b>0.611</b> ± 0.808 0.371 | <b>0.370</b> ± 0.420 0.344 | <b>0.870</b> ± 1.241 0.203 | CCACTTATTCATTTTTGATTATTGTATCCATTTTTTAAAAAACGGAT      |
| chromosome | 47284  | BB_0050 |             | <b>0.186</b> ± 0.202 0.072 | <b>0.660</b> ± 0.667 0.203 | <b>0.881</b> ± 0.636 0.320 | <b>0.882</b> ± 0.614 0.237 | TAATAATTGCTACTGCAACCCATGCAAAATAATCCGTTTTTTTTAAAAAAA  |
| chromosome | 47302  | BB_0050 |             | <b>0.326</b> ± 0.410 0.170 | <b>0.683</b> ± 0.759 0.057 | <b>1.088</b> ± 0.869 0.891 | <b>0.916</b> ± 0.681 0.821 | AAACTTGAATGTTTGTCTATAATAATTTGCTACTGCAACCCATGCAAAATC  |
| chromosome | 47348  | BB_0050 |             | <b>0.229</b> ± 0.250 0.028 | <b>0.658</b> ± 0.592 0.481 | <b>0.846</b> ± 0.281 0.133 | <b>0.973</b> ± 0.364 0.937 | ATGTTGCCAATGTAGCATTAAATCCAAATTTGTAATTTGTTTTAAAACT    |
| chromosome | 47956  | BB_0051 |             | <b>0.308</b> ± 0.380 0.025 | <b>0.613</b> ± 0.718 0.121 | <b>0.583</b> ± 0.371 0.161 | <b>0.897</b> ± 0.664 0.862 | TAAATAGAAACATTCCTGTCCACAAGCTTAAATCAAAACATATCCTTATTCA |
| chromosome | 47957  | BB_0051 |             | <b>0.605</b> ± 0.596 0.600 | <b>0.985</b> ± 1.255 0.988 | <b>1.722</b> ± 2.083 0.624 | <b>1.920</b> ± 1.684 0.302 | TATATACAGCATTGGGAATTCCTTACCAGTTTTTTGGAAAAATCTGGGCTT  |
| chromosome | 48047  | BB_0051 |             | <b>0.498</b> ± 0.471 0.059 | <b>0.551</b> ± 0.588 0.005 | <b>0.814</b> ± 0.807 0.400 | <b>0.522</b> ± 0.447 0.084 | TAATATTAAGAAATTTAAAAATATTTGGAATGTCCTTAAATTTATCAGGCA  |
| chromosome | 48216  | BB_0051 |             | <b>0.192</b> ± 0.193 0.124 | <b>1.597</b> ± 1.832 0.637 | <b>4.066</b> ± 3.010 0.194 | <b>1.818</b> ± 1.855 0.419 | AAGCATAATTGTAAGTATTGTTTAGCAAAAGACTCAATACCACGGATTT    |
| chromosome | 48544  | BB_0051 |             | <b>0.160</b> ± 0.232 0.010 | <b>0.268</b> ± 0.376 0.001 | <b>1.416</b> ± 0.605 0.116 | <b>1.066</b> ± 0.493 0.877 | ATTGCAATCGATACCATTTTTTACCATTTTATAAAATCTTGGAAAAATA    |
| chromosome | 49326  | IG 8    |             | <b>0.972</b> ± 0.359 0.748 | <b>1.188</b> ± 0.424 0.469 | <b>0.823</b> ± 0.328 0.148 | <b>0.902</b> ± 0.407 0.448 | AGAAATAGTTTGAATTTGAAATATATTAAGGACTGATTTGTTATTTTTG    |
| chromosome | 49717  | BB_0053 | <i>ung</i>  | <b>0.439</b> ± 0.197 0.028 | <b>0.923</b> ± 0.532 0.566 | <b>0.777</b> ± 0.300 0.089 | <b>1.094</b> ± 0.632 0.674 | CAATTTTAAACAGTCGAAGAAGGCAACCTTCTTCCACAAAGCTATTGGGT   |
| chromosome | 50110  | IG 9    |             | <b>1.622</b> ± 2.645 0.725 | <b>1.087</b> ± 1.484 0.928 | <b>1.792</b> ± 2.033 0.489 | <b>1.696</b> ± 2.608 0.440 | AATATTTTTCTTCAAATGTTTTCTTAAATTCATTAATATTAGCATCT      |
| chromosome | 65791  | BB_0071 |             | <b>0.796</b> ± 0.509 0.663 | <b>1.150</b> ± 1.206 0.847 | <b>0.810</b> ± 0.760 0.670 | <b>1.055</b> ± 0.876 0.621 | TAAAAAACCTAAAAACGCAACCATTTTTTTCTATGCTAAAAAATAGCA     |
| chromosome | 66472  | BB_0071 |             | <b>0.508</b> ± 0.579 0.350 | <b>0.227</b> ± 0.166 0.042 | <b>0.097</b> ± 0.107 0.079 | <b>0.176</b> ± 0.306 0.024 | TAGAGCTGTGAATGTAATAAAAAATAGTAAGTGTTTTATTTTGTCTTAG    |
| chromosome | 66781  | BB_0071 |             | <b>1.282</b> ± 0.438 0.411 | <b>0.987</b> ± 0.837 0.982 | <b>0.575</b> ± 0.244 0.110 | <b>0.619</b> ± 0.202 0.187 | CTTTGATTATTTAAATCCTAATAACATTTATATAATGCTGGGATACAACAA  |
| chromosome | 81398  | BB_0085 |             | <b>0.576</b> ± 0.184 0.089 | <b>0.471</b> ± 0.395 0.304 | <b>0.733</b> ± 0.280 0.080 | <b>0.852</b> ± 0.360 0.073 | GTTCTCCTTAAAGGCTTATAGCTTCCAAACTATCTTTTAAATGATTTGTAT  |
| chromosome | 81970  | BB_0086 |             | <b>0.588</b> ± 0.564 0.088 | <b>0.879</b> ± 0.840 0.653 | <b>0.796</b> ± 0.522 0.182 | <b>1.223</b> ± 0.885 0.410 | ATATAATCTTTTTCAATATTGATTTGGGGTTAGTATTTGTTCTGGGGGG    |
| chromosome | 81973  | BB_0086 |             | <b>0.400</b> ± 0.357 0.042 | <b>0.730</b> ± 0.728 0.055 | <b>0.745</b> ± 0.558 0.052 | <b>0.926</b> ± 0.696 0.453 | TAGATTATGACTTTAAAAACATAAAAGGACAACAAGAGCAAAAAGACAA    |
| chromosome | 84019  | IG 10   |             | <b>0.420</b> ± 0.566 0.379 | <b>0.142</b> ± 0.152 0.093 | <b>0.365</b> ± 0.305 0.191 | <b>0.441</b> ± 0.464 0.149 | CCTTAAAAATAAAAACAAATTAATTATCATTGGATTTTGAACCGCAA      |
| chromosome | 95635  | BB_0098 |             | <b>0.441</b> ± 0.501 0.472 | <b>0.833</b> ± 1.341 0.342 | <b>0.693</b> ± 1.076 0.221 | <b>0.553</b> ± 0.616 0.545 | ATTCCTATGTTTTAATATCAACTCATTATAATGCTCTTAAATATTTTGCAT  |
| chromosome | 96334  | BB_0098 |             | <b>1.177</b> ± 0.677 0.351 | <b>1.581</b> ± 0.842 0.112 | <b>0.889</b> ± 0.423 0.242 | <b>1.084</b> ± 0.568 0.466 | GACTTAAGAGCAAGGGTATATTATTCCGATTTATAACAACAATAATAGAA   |
| chromosome | 96794  | BB_0098 |             | <b>0.883</b> ± 0.304 0.667 | <b>1.717</b> ± 0.841 0.308 | <b>0.856</b> ± 0.304 0.613 | <b>1.393</b> ± 0.651 0.452 | AGTCTGATTAGAATGCTTTTTGAAAGTTCGAAAGGATATCCAAATCTTTT   |
| chromosome | 100456 | BB_0102 |             | <b>0.314</b> ± 0.324 0.293 | <b>0.739</b> ± 0.840 0.231 | <b>0.287</b> ± 0.295 0.285 | <b>1.110</b> ± 1.200 0.901 | TATTGGAATTTATATTTTTTCGCTGTTGTATCTCTTTTTAAAAATTGATT   |
| chromosome | 100459 | BB_0102 |             | <b>0.802</b> ± 0.861 0.070 | <b>3.422</b> ± 3.417 0.287 | <b>0.808</b> ± 0.725 0.700 | <b>1.250</b> ± 1.011 0.274 | TACATACAAAAATCAAAAAAATAAATACCCCAACAGAAATTTAGGCAAT    |
| chromosome | 100508 | BB_0102 |             | <b>1.176</b> ± 0.282 0.425 | <b>1.698</b> ± 0.874 0.221 | <b>1.066</b> ± 1.223 0.941 | <b>1.238</b> ± 0.321 0.383 | TTGCCTAAATTTCTGTTGGGGTAATTAATTTTTTTGATTTTTGTATGAT    |
| chromosome | 100723 | BB_0102 |             | <b>0.076</b> ± 0.115 0.171 | <b>1.635</b> ± 2.625 0.699 | <b>1.830</b> ± 1.577 0.284 | <b>6.197</b> ± 6.815 0.212 | TAAAGTGATCCCTTTGTTTTAGCATTTAATTATTATTCCTAGATTAT      |
| chromosome | 108273 | IG 11   |             | <b>1.584</b> ± 1.622 0.343 | <b>1.892</b> ± 2.045 0.348 | <b>2.445</b> ± 2.309 0.168 | <b>2.189</b> ± 1.844 0.266 | TTTAAATAACAAGCTAAAATGTTATAATTTTTAAATGCGGTTAAAAAAT    |
| chromosome | 108498 | BB_0110 |             | <b>1.132</b> ± 0.555 0.561 | <b>2.065</b> ± 1.479 0.250 | <b>0.831</b> ± 0.378 0.412 | <b>1.401</b> ± 0.459 0.091 | TGTTTCAAATACAATTTTATAATAAATTTAGAAGCACACATGTTAACCTA   |
| chromosome | 108858 | BB_0110 |             | <b>0.872</b> ± 1.069 0.677 | <b>0.921</b> ± 1.342 0.900 | <b>0.023</b> ± 0.029 0.085 | <b>0.318</b> ± 0.330 0.049 | ATTTTCTAAATTTAAAAAATTCATGTAAGAGTAATTTAGAGCAAAGCTTAA  |
| chromosome | 109402 | BB_0110 |             | <b>0.271</b> ± 0.115 0.080 | <b>0.507</b> ± 0.422 0.335 | <b>0.890</b> ± 0.420 0.057 | <b>1.027</b> ± 0.468 0.792 | ATTTCCGGGATTTTTTGCCTATAATCAAAACAATAAGATATCAAAAGC     |
| chromosome | 109566 | BB_0110 |             | <b>2.215</b> ± 1.599 0.034 | <b>3.619</b> ± 3.286 0.210 | <b>1.584</b> ± 1.140 0.328 | <b>1.894</b> ± 1.554 0.424 | TTCAAAAGTTAACTATATTCCTATAGCTTATAACTTAGATGAAAAAAT     |
| chromosome | 109591 | BB_0110 |             | <b>2.076</b> ± 1.541 0.164 | <b>1.925</b> ± 2.300 0.595 | <b>1.008</b> ± 0.954 0.985 | <b>1.548</b> ± 1.057 0.295 | GCTTATAACTTAGATGAAAAAATTTAGAAAAACATTCTATTAACCTTAAT   |
| chromosome | 113343 | BB_0116 |             | <b>0.811</b> ± 0.211 0.374 | <b>0.718</b> ± 0.630 0.477 | <b>0.938</b> ± 0.409 0.837 | <b>1.591</b> ± 0.900 0.395 | TCTGAAATCAAAGTATCTATAAAGCCAACATAAAGTAAAATAATAAGAG    |
| chromosome | 114678 | IG 12   |             | <b>1.032</b> ± 0.829 0.901 | <b>1.396</b> ± 1.038 0.464 | <b>0.423</b> ± 0.375 0.179 | <b>0.843</b> ± 0.773 0.764 | AGTAAAGTTTTTTTTGCAAAAAAGCTTTATAATAAATAGTGTGTTCTG     |
| chromosome | 114972 | BB_0117 |             | <b>0.980</b> ± 1.049 0.979 | <b>1.817</b> ± 2.090 0.588 | <b>0.925</b> ± 1.175 0.926 | <b>0.708</b> ± 1.141 0.698 | AATCTTTTTCTTAAAGTAGATATTGTAACAAGAATTGTTGTTCCAATGA    |
| chromosome | 115017 | BB_0117 |             | <b>0.963</b> ± 0.427 0.912 | <b>1.307</b> ± 0.592 0.479 | <b>0.642</b> ± 0.268 0.281 | <b>1.113</b> ± 0.505 0.578 | ATAGGGTCATTGAAAAATCCGTAATCAAGAATCACAACTACATGTAATCTT  |
| chromosome | 120706 | IG 13   |             | <b>0.734</b> ± 0.498 0.599 | <b>1.671</b> ± 1.192 0.448 | <b>0.576</b> ± 0.368 0.387 | <b>0.912</b> ± 0.559 0.853 | TTTTAATGAGGTGGACTTATAAATGGATTGTTTTATTATATTCTTATAA    |
| chromosome | 131253 | IG 14   |             | <b>0.246</b> ± 0.158 0.069 | <b>0.505</b> ± 0.482 0.420 | <b>0.579</b> ± 0.308 0.201 | <b>0.766</b> ± 0.400 0.163 | TATTATAATATAAAAAAGAAATTTGGGAGTCAAATCTAGCTATATGGAA    |
| chromosome | 132171 | BB_0134 |             | <b>0.309</b> ± 0.332 0.081 | <b>0.754</b> ± 1.020 0.712 | <b>0.178</b> ± 0.197 0.195 | <b>0.218</b> ± 0.401 0.220 | TTGATGGATCTTTTTAATATCTTTTAGGTTAGATGTTCAATAAGCTAA     |
| chromosome | 132234 | BB_0134 |             | <b>1.266</b> ± 1.021 0.638 | <b>1.441</b> ± 2.043 0.755 | <b>0.921</b> ± 0.755 0.756 | <b>2.252</b> ± 1.986 0.196 | TGTTATCTTTTTTCGATATTTACTACTCTTCCATTTTACATACA         |

|            |        |         |                            |                            |                            |                            |                                                       |
|------------|--------|---------|----------------------------|----------------------------|----------------------------|----------------------------|-------------------------------------------------------|
| chromosome | 137924 | BB_0138 | <b>2.286</b> ± 1.902 0.067 | <b>2.076</b> ± 2.562 0.336 | <b>0.735</b> ± 0.651 0.335 | <b>1.566</b> ± 1.629 0.340 | AAATATTTTTTAAACTTTGTTTTGATTTTTAGGTTTTTATTAATTGATC     |
| chromosome | 139215 | BB_0140 | <b>2.297</b> ± 2.104 0.260 | <b>5.910</b> ± 4.893 0.147 | <b>1.662</b> ± 1.366 0.512 | <b>1.918</b> ± 1.379 0.386 | CATTTTCTTGCAGGAGAAAAGCTTCTATTTTTGCTGCAATTGGTATGCTT    |
| chromosome | 139328 | BB_0140 | <b>1.018</b> ± 0.330 0.761 | <b>1.229</b> ± 0.542 0.457 | <b>0.728</b> ± 0.261 0.073 | <b>1.056</b> ± 0.287 0.757 | TGATGGCTATTATTGTTGTGTTGGTATTAGGCTTCTCAATTTGAATCTT     |
| chromosome | 139335 | BB_0140 | <b>0.782</b> ± 0.345 0.404 | <b>1.567</b> ± 0.685 0.077 | <b>0.653</b> ± 0.294 0.264 | <b>1.006</b> ± 0.455 0.935 | ATCATTATGATGGCTATTATTGTTGTGTTGGTATTGCTTGTGCTTCAAAATTT |
| chromosome | 139375 | BB_0140 | <b>1.818</b> ± 2.185 0.261 | <b>1.312</b> ± 1.800 0.812 | <b>1.147</b> ± 1.416 0.887 | <b>0.664</b> ± 0.801 0.704 | TTCTCCTTCAACCTTAAGAGTTATGCCTCTTTATGGGGCACCTTATTATT    |
| chromosome | 139421 | BB_0140 | <b>0.562</b> ± 0.530 0.196 | <b>0.852</b> ± 0.808 0.814 | <b>1.095</b> ± 0.751 0.812 | <b>0.638</b> ± 0.428 0.081 | TTATTAATAAAAATCTACAACCTTTGCGGTTACTGGGGTAAATATCATCT    |
| chromosome | 140094 | BB_0140 | <b>1.183</b> ± 1.074 0.706 | <b>1.899</b> ± 1.553 0.245 | <b>0.826</b> ± 0.701 0.723 | <b>1.523</b> ± 1.273 0.505 | TTCTATCAGCAGCAAAGTAGCAATAACTTTTATATCCTTTAGCCTCAC      |
| chromosome | 140120 | BB_0140 | <b>1.278</b> ± 1.890 0.842 | <b>2.000</b> ± 2.716 0.346 | <b>1.301</b> ± 1.667 0.573 | <b>0.588</b> ± 0.838 0.580 | ATACCTTTTATATCCTTTAGCCTCCTTTTACAATTTCAAAAATCTAATTA    |
| chromosome | 141502 | BB_0140 | <b>0.212</b> ± 0.357 0.362 | <b>1.534</b> ± 2.475 0.492 | <b>0.498</b> ± 0.788 0.537 | <b>1.009</b> ± 1.898 0.995 | TCITTTAAGCTCAGAACTGGCCTTACAGAATTAATAACAATTTCCATTAC    |
| chromosome | 141724 | BB_0140 | <b>0.669</b> ± 0.330 0.279 | <b>0.608</b> ± 0.553 0.446 | <b>0.644</b> ± 0.218 0.202 | <b>0.943</b> ± 0.293 0.781 | TATATTTTTTAAATCTTTACCGAACTCAAGCCTCTCAAGGACTCTAGA      |
| chromosome | 142878 | BB_0141 | <b>0.705</b> ± 0.804 0.623 | <b>0.343</b> ± 0.474 0.142 | <b>0.449</b> ± 0.606 0.308 | <b>0.782</b> ± 1.003 0.835 | TTCTAGTTTTAGTTGCTTGTGTTGGTGATAACAAGCTAGATGACAAAAAT    |
| chromosome | 142908 | BB_0141 | <b>1.215</b> ± 0.558 0.550 | <b>1.710</b> ± 0.761 0.131 | <b>1.010</b> ± 0.521 0.970 | <b>1.269</b> ± 0.701 0.192 | AATTAATATTAATAAAATCAAATTCATCAAAATCCTCTTAGTCTAATGAAT   |
| chromosome | 143234 | BB_0142 | <b>1.243</b> ± 1.093 0.511 | <b>1.315</b> ± 1.462 0.695 | <b>0.733</b> ± 0.441 0.482 | <b>0.308</b> ± 0.391 0.180 | CAAAAACAATGTTGAAGTAAATCAGGAATTTAAAATCTAGATTGTGGCAA    |
| chromosome | 143828 | BB_0142 | <b>1.039</b> ± 0.410 0.823 | <b>1.649</b> ± 1.183 0.398 | <b>0.703</b> ± 0.136 0.008 | <b>0.969</b> ± 0.241 0.648 | GCTTGATATTACGAACAGCACTCTCCCTTCTATTTTTGCGCTTTCATATT    |
| chromosome | 143861 | BB_0142 | <b>2.514</b> ± 3.015 0.038 | <b>1.931</b> ± 2.232 0.008 | <b>0.685</b> ± 1.114 0.098 | <b>2.089</b> ± 2.625 0.448 | TTTTGCGCTTTCATATTTCCAACATAACAAGTTGCAATTCCTTTAAAACAG   |
| chromosome | 144506 | BB_0143 | <b>1.641</b> ± 2.176 0.585 | <b>1.414</b> ± 1.446 0.130 | <b>1.309</b> ± 1.857 0.766 | <b>1.321</b> ± 1.250 0.613 | ACGCATTATTCAAAGGGGAAACGATTTTACTCCTAAATACAAACCCATTT    |
| chromosome | 150942 | IG 15   | <b>0.001</b> ± 0.001 0.031 | <b>0.379</b> ± 0.365 0.067 | <b>0.526</b> ± 0.337 0.018 | <b>0.467</b> ± 0.181 0.123 | GTAATAAATAAATAAATAAAGGAAAAATAAAAAATGCCAATTTTTGCTTAT   |
| chromosome | 157593 | BB_0155 | <b>0.375</b> ± 0.385 0.177 | <b>0.293</b> ± 0.270 0.175 | <b>0.668</b> ± 0.647 0.477 | <b>0.479</b> ± 0.338 0.316 | ATTTTAATAATGCATTTAAATTCACCAGTAAACACTAACACCAAGTTTTC    |
| chromosome | 157950 | BB_0156 | <b>1.110</b> ± 0.727 0.595 | <b>1.160</b> ± 0.559 0.557 | <b>1.002</b> ± 0.476 0.995 | <b>1.157</b> ± 0.716 0.512 | TGTTGTAAGTTTTTGTCTTATATAAAGCAAATGCTTCAATTAATTT        |
| chromosome | 157960 | BB_0156 | <b>0.434</b> ± 0.447 0.282 | <b>0.929</b> ± 0.977 0.915 | <b>0.648</b> ± 0.473 0.256 | <b>1.004</b> ± 0.690 0.989 | TATTAGCATATGTTGTAAGTTTTTGTCTTATATAAAGCAAATGCTTT       |
| chromosome | 157993 | BB_0156 | <b>0.903</b> ± 0.324 0.600 | <b>1.196</b> ± 0.276 0.368 | <b>0.867</b> ± 0.223 0.556 | <b>1.150</b> ± 0.477 0.674 | TTACTTAATAAACTTTCTTTTATAGATTATATTAGCATATGTTGTA        |
| chromosome | 157996 | BB_0156 | <b>0.665</b> ± 0.613 0.336 | <b>0.514</b> ± 0.426 0.243 | <b>0.701</b> ± 0.676 0.232 | <b>1.138</b> ± 1.110 0.786 | TTAAAGAGTAATGGCAATAAATGTCITTTTATAGTAAAGAATAAAAACCT    |
| chromosome | 158214 | BB_0157 | <b>0.310</b> ± 0.238 0.079 | <b>0.305</b> ± 0.173 0.106 | <b>0.280</b> ± 0.173 0.147 | <b>0.407</b> ± 0.242 0.122 | ATCCAAAAATGCTTTTTACCTTTTTATTATCGTTTATTAATTTACAAAAAT   |
| chromosome | 158431 | BB_0157 | <b>0.260</b> ± 0.314 0.056 | <b>0.636</b> ± 0.629 0.470 | <b>0.836</b> ± 0.680 0.752 | <b>1.247</b> ± 0.684 0.504 | TAGGAATAATTCATTTTTAGCAGCAGAAATACCTTATTGTAAGATATTG     |
| chromosome | 158548 | IG 16   | <b>1.175</b> ± 0.729 0.574 | <b>1.687</b> ± 1.070 0.269 | <b>0.934</b> ± 0.446 0.570 | <b>1.257</b> ± 0.596 0.317 | GAATGCTAATGTCAAAGTCAAGTCGCTTTTGGTTTTATTTAAATTCGCAAT   |
| chromosome | 158769 | BB_0158 | <b>0.563</b> ± 0.893 0.674 | <b>1.239</b> ± 1.890 0.584 | <b>0.207</b> ± 0.403 0.396 | <b>0.562</b> ± 0.594 0.568 | ATATCAGGCAAAATTTCAAATAAAAAATGCCAATCATAAATAGTAATCAT    |
| chromosome | 159201 | BB_0158 | <b>0.909</b> ± 0.165 0.311 | <b>1.602</b> ± 0.840 0.330 | <b>0.867</b> ± 0.171 0.146 | <b>1.117</b> ± 0.268 0.409 | ACTGTCAAAAATAAACTTACTCAAGAACTAAAATTTATAAAATTTCTCTT    |
| chromosome | 159465 | BB_0159 | <b>0.804</b> ± 0.701 0.543 | <b>1.230</b> ± 1.429 0.773 | <b>0.240</b> ± 0.255 0.069 | <b>0.713</b> ± 0.488 0.045 | TAATTTTGTGTTTGAAGATATTAATTTGTTTTGAGAAAAGCTATTTTTA     |
| chromosome | 159613 | BB_0159 | <b>0.667</b> ± 0.588 0.389 | <b>0.771</b> ± 0.629 0.576 | <b>0.185</b> ± 0.323 0.083 | <b>0.190</b> ± 0.049 0.014 | TTCAATTTATAAATGATTTTTCAAAAATGGATCTTCTGCTATTATTTCAAT   |
| chromosome | 159762 | BB_0159 | <b>0.670</b> ± 0.378 0.176 | <b>1.751</b> ± 1.944 0.556 | <b>0.760</b> ± 0.330 0.413 | <b>0.918</b> ± 0.544 0.732 | CTAGTGGAAAACAGCAATCAAAAAAGAGCTTGCAAAGACGCTTACTCAT     |
| chromosome | 160086 | IG 17   | <b>1.087</b> ± 0.744 0.576 | <b>1.560</b> ± 1.551 0.415 | <b>0.847</b> ± 0.472 0.306 | <b>1.008</b> ± 0.682 0.915 | GCTCTCTTAGAGAAGTAAAAATCTTTTTCTATTAAATTTGATGTTTATCT    |
| chromosome | 161965 | BB_0161 | <b>0.732</b> ± 0.664 0.465 | <b>0.498</b> ± 0.613 0.221 | <b>0.801</b> ± 1.392 0.809 | <b>0.124</b> ± 0.194 0.039 | TTACAAGGAATATAATTACGACAATAATAAATTTAACAATCAGTCAAAA     |
| chromosome | 162049 | BB_0161 | <b>0.524</b> ± 0.630 0.279 | <b>0.307</b> ± 0.462 0.093 | <b>0.021</b> ± 0.037 0.004 | <b>0.519</b> ± 0.767 0.355 | TGATATTAATAACAACCTGACTCCTGATGAAAAATATGTAGCAATTTATCG   |
| chromosome | 162108 | BB_0161 | <b>0.723</b> ± 0.335 0.036 | <b>1.049</b> ± 0.550 0.535 | <b>0.828</b> ± 0.399 0.069 | <b>1.046</b> ± 0.617 0.727 | CAGAAAAATGGATTTGAAACAGCATAAGCCGATTTATCAAGATATTCCTCT   |
| chromosome | 162161 | BB_0161 | <b>0.322</b> ± 0.146 0.071 | <b>0.724</b> ± 0.422 0.328 | <b>0.579</b> ± 0.475 0.248 | <b>0.612</b> ± 0.837 0.327 | TTAAAGAGGAATATCTTGATAAATCGGCTTATGCTGTTTCAAATCCATTTT   |
| chromosome | 162247 | BB_0161 | <b>0.289</b> ± 0.284 0.085 | <b>1.031</b> ± 0.622 0.952 | <b>0.997</b> ± 0.490 0.995 | <b>0.812</b> ± 0.204 0.403 | CAAAACCGTTTTAAACAAATTTGGTATGATCGTAGCTATCTTTGAAAAATA   |
| chromosome | 163768 | BB_0163 | <b>2.425</b> ± 1.579 0.260 | <b>3.166</b> ± 2.335 0.246 | <b>1.015</b> ± 0.351 0.950 | <b>0.646</b> ± 0.315 0.194 | CAAGCCTTTTGATATGAGTTTTTTTTAGAAGAATATGAAAAGGTTTTGAA    |
| chromosome | 164876 | IG 18   | <b>0.669</b> ± 1.122 0.710 | <b>1.292</b> ± 1.184 0.727 | <b>0.741</b> ± 0.482 0.201 | <b>0.466</b> ± 0.299 0.173 | ACAAGTCAAAATTAAGATCAAATAATCAATAAAAGTTAAATAACATTAAT    |
| chromosome | 164996 | BB_0164 | <b>0.701</b> ± 0.381 0.349 | <b>1.225</b> ± 0.395 0.505 | <b>0.888</b> ± 0.259 0.242 | <b>1.187</b> ± 0.431 0.439 | GTGGTTAAATTTAAAGGGGTTTTGGTAGGGGCATTTCTTTAATTTTTTTG    |
| chromosome | 166288 | BB_0165 | <b>0.667</b> ± 1.028 0.337 | <b>0.790</b> ± 1.051 0.844 | <b>0.511</b> ± 0.663 0.504 | <b>0.840</b> ± 1.184 0.615 | TTAGTAGGAACACGCACTTACCATAAATCAACAAGAAATAGGAACA        |
| chromosome | 167086 | BB_0165 | <b>1.692</b> ± 0.777 0.241 | <b>2.184</b> ± 2.025 0.312 | <b>0.625</b> ± 0.517 0.479 | <b>0.860</b> ± 0.808 0.811 | GATAAGTCTAAAAATCGTATTATTTGCTTTTTGAAAGGAAAAGATATTTTT   |
| chromosome | 167250 | BB_0165 | <b>0.780</b> ± 0.384 0.297 | <b>1.140</b> ± 0.946 0.681 | <b>0.617</b> ± 0.389 0.148 | <b>0.891</b> ± 0.513 0.447 | ATATCCTGCACCTAAATAAATCTCGGGAATCAAACGATTTAAATTTTTAAA   |
| chromosome | 167772 | IG 19   | <b>0.996</b> ± 0.423 0.973 | <b>1.921</b> ± 1.919 0.424 | <b>0.749</b> ± 0.407 0.109 | <b>0.973</b> ± 0.468 0.841 | CTTGCAAATGAAAAATATAAATAACAGTGATTTTTATTGACAAATTAG      |
| chromosome | 168894 | BB_0166 | <b>0.985</b> ± 0.389 0.931 | <b>2.279</b> ± 1.425 0.230 | <b>0.886</b> ± 0.406 0.472 | <b>1.266</b> ± 0.500 0.372 | AAAGCATTCTTGACTCTTTAAAAAATATTTCTTTAAACGCAACAAAACCT    |
| chromosome | 169313 | BB_0166 | <b>0.803</b> ± 0.714 0.293 | <b>1.088</b> ± 1.094 0.781 | <b>0.603</b> ± 0.453 0.513 | <b>1.164</b> ± 0.911 0.812 | TGGCAATGGAGATTTAGGGAAAGGAGCTTATAAATTTATAGATTTTTTGT    |
| chromosome | 169316 | BB_0166 | <b>0.773</b> ± 0.255 0.350 | <b>2.162</b> ± 0.987 0.052 | <b>1.348</b> ± 0.806 0.584 | <b>2.694</b> ± 2.083 0.243 | TTTAGATGGTAAAGAGCTTATGTTAAGCAAATACCACCTTTTCTTTTTAA    |
| chromosome | 169456 | IG 20   | <b>1.153</b> ± 1.275 0.796 | <b>0.992</b> ± 0.993 0.993 | <b>0.831</b> ± 1.180 0.879 | <b>1.510</b> ± 1.395 0.634 | ATAAATATCAGATCAGAACACATATAAATAGCAATTTTAAAAAAATTA      |
| chromosome | 170029 | BB_0167 | <b>1.004</b> ± 0.866 0.967 | <b>0.911</b> ± 0.832 0.703 | <b>0.878</b> ± 0.830 0.248 | <b>0.953</b> ± 0.950 0.511 | ACTACGAATAAAGGCAAAGAAGAGCACAAATGGCAAGCATTACCACATAA    |
| chromosome | 170293 | BB_0167 | <b>1.496</b> ± 0.964 0.452 | <b>1.226</b> ± 0.920 0.544 | <b>0.775</b> ± 0.495 0.575 | <b>1.283</b> ± 0.927 0.699 | AGATTATCATTTGGAAGCTCAATGAAACTATCTGCCAAGAGAGTTTCCA     |

|            |        |         |             |                      |       |                      |       |                      |       |                      |       |                                                       |
|------------|--------|---------|-------------|----------------------|-------|----------------------|-------|----------------------|-------|----------------------|-------|-------------------------------------------------------|
| chromosome | 170487 | BB_0167 |             | <b>1.240</b> ± 0.936 | 0.267 | <b>1.623</b> ± 0.993 | 0.317 | <b>1.209</b> ± 1.043 | 0.596 | <b>0.702</b> ± 0.673 | 0.499 | CTAATAGAAGGACATACTGAGCAATTTGGATTGGGAAGAAGAGATGCACGAG  |
| chromosome | 170538 | BB_0167 |             | <b>1.933</b> ± 0.687 | 0.025 | <b>1.433</b> ± 0.523 | 0.261 | <b>1.247</b> ± 0.550 | 0.378 | <b>1.357</b> ± 0.666 | 0.063 | GCTCGTGCATCTCTTCCAATCCAATTTGCTCAGTATGCCTCTTATTA       |
| chromosome | 170614 | BB_0167 |             | <b>0.619</b> ± 0.450 | 0.154 | <b>1.185</b> ± 0.869 | 0.690 | <b>0.593</b> ± 0.299 | 0.052 | <b>0.945</b> ± 0.485 | 0.786 | AATAGTATTTGGTCTTTGTCTTTTACTTTTCATTTTTATTAATAAATTTCCA  |
| chromosome | 191551 | BB_0194 |             | <b>0.544</b> ± 0.120 | 0.011 | <b>1.097</b> ± 0.326 | 0.692 | <b>0.657</b> ± 0.227 | 0.118 | <b>1.000</b> ± 0.330 | 0.999 | TAATAGCTTTAAAGATCTTTTATTGCTGCTTAAAGATTTTTATTATAATTTAT |
| chromosome | 192220 | BB_0194 |             | <b>0.674</b> ± 0.568 | 0.152 | <b>0.881</b> ± 0.301 | 0.618 | <b>0.486</b> ± 0.155 | 0.105 | <b>0.938</b> ± 0.357 | 0.746 | CATTATTAATGAATGTTTTAAAAACGGCTTTTCTATTTTCTTGATGTTGG    |
| chromosome | 202795 | IG 21   |             | <b>1.125</b> ± 0.738 | 0.485 | <b>1.436</b> ± 0.780 | 0.365 | <b>0.507</b> ± 0.294 | 0.273 | <b>1.151</b> ± 0.972 | 0.420 | CTTAAGGACATAACTTAAAGCATTTTTATTAAGATAAAATAAAATAATAC    |
| chromosome | 202799 | IG 22   |             | <b>0.436</b> ± 0.316 | 0.141 | <b>1.357</b> ± 0.637 | 0.180 | <b>0.428</b> ± 0.308 | 0.252 | <b>1.248</b> ± 0.711 | 0.680 | AGGCATAACTTAAAGCATTTTTATTAAGATAAAATAAAATAATACATAT     |
| chromosome | 202829 | IG 23   |             | <b>0.702</b> ± 0.595 | 0.494 | <b>0.650</b> ± 0.561 | 0.412 | <b>1.534</b> ± 0.320 | 0.107 | <b>1.700</b> ± 0.342 | 0.054 | TCITTAATAAAAAATGCTTTAAGTTATGTCCTTAAAGTATAAAAAATTTTTTG |
| chromosome | 202846 | IG 24   |             | <b>0.587</b> ± 0.443 | 0.480 | <b>0.665</b> ± 0.668 | 0.645 | <b>0.796</b> ± 0.459 | 0.391 | <b>0.961</b> ± 0.517 | 0.862 | TGTATTATTTTAAITTTATCTTTAATAAAAAATGCTTTAAGTTATGCTCTTAA |
| chromosome | 202849 | IG 25   |             | <b>0.075</b> ± 0.134 | 0.065 | <b>0.059</b> ± 0.060 | 0.071 | <b>0.300</b> ± 0.287 | 0.153 | <b>0.488</b> ± 0.430 | 0.004 | TATGCTAGAATTAATCATAACTACTATTTATAATATTATCTGCTATTTT     |
| chromosome | 202851 | BB_0202 |             | <b>0.442</b> ± 0.290 | 0.118 | <b>0.554</b> ± 0.469 | 0.291 | <b>0.846</b> ± 0.243 | 0.204 | <b>1.023</b> ± 0.320 | 0.851 | TGCTAGAATTAATCATAACTACTATTTATAATATTATCTGCTATTTTCT     |
| chromosome | 202865 | BB_0202 |             | <b>0.404</b> ± 0.734 | 0.470 | <b>0.000</b> ± 0.000 | 0.088 | <b>0.374</b> ± 0.679 | 0.429 | <b>0.846</b> ± 1.426 | 0.780 | TGATTAATCTAGCATATATGATTATTTAAATTTATCTTTAATAAAAAATG    |
| chromosome | 202871 | BB_0202 |             | <b>1.014</b> ± 0.483 | 0.967 | <b>0.741</b> ± 0.631 | 0.564 | <b>1.054</b> ± 0.147 | 0.451 | <b>1.242</b> ± 0.270 | 0.223 | CTACTATTTATAAATATTATCTGCTATTTTCTCAGCATCTGAAACAGCTTAT  |
| chromosome | 202874 | BB_0202 |             | <b>0.481</b> ± 0.172 | 0.117 | <b>0.690</b> ± 0.587 | 0.553 | <b>0.898</b> ± 0.203 | 0.352 | <b>1.071</b> ± 0.276 | 0.035 | CTATTTATAAATATTATCTGCTATTTTCTCAGCATCTGAAACAGCTTACT    |
| chromosome | 202896 | BB_0202 |             | <b>0.480</b> ± 0.409 | 0.069 | <b>0.952</b> ± 0.930 | 0.849 | <b>1.185</b> ± 0.921 | 0.564 | <b>1.387</b> ± 0.855 | 0.233 | TTTTCTCAGCATCTGAAACAGCTTACTTCAATTAAGCATAAATCAGATAC    |
| chromosome | 202921 | BB_0202 |             | <b>0.397</b> ± 0.225 | 0.132 | <b>0.365</b> ± 0.305 | 0.206 | <b>0.696</b> ± 0.300 | 0.051 | <b>0.754</b> ± 0.361 | 0.020 | TACTTCAATTAAGCATAAATCAGATACAAGACATAAGAAAAAGGGGAAATC   |
| chromosome | 202955 | BB_0202 |             | <b>0.461</b> ± 0.346 | 0.196 | <b>0.449</b> ± 0.439 | 0.406 | <b>0.772</b> ± 0.566 | 0.373 | <b>0.932</b> ± 0.726 | 0.594 | AGAAAAAGGGGAAATCGGGAATATCCGTGACAAITTTGGTCAATCTCCT     |
| chromosome | 202976 | BB_0202 |             | <b>0.448</b> ± 0.219 | 0.211 | <b>0.483</b> ± 0.464 | 0.408 | <b>0.705</b> ± 0.381 | 0.361 | <b>0.907</b> ± 0.455 | 0.600 | TTCCCGATTTCCCTTTTTTCTTATGCTTTGATCTGAAATTAATGCTTAATG   |
| chromosome | 203025 | BB_0202 |             | <b>0.471</b> ± 0.212 | 0.189 | <b>0.483</b> ± 0.430 | 0.389 | <b>0.857</b> ± 0.557 | 0.038 | <b>1.048</b> ± 0.679 | 0.589 | TTCTTATCGGCAACAATATATCAACATTGTAGCAAGCACACTTACAACAA    |
| chromosome | 203057 | BB_0202 |             | <b>0.220</b> ± 0.144 | 0.033 | <b>0.682</b> ± 0.630 | 0.503 | <b>0.548</b> ± 0.355 | 0.295 | <b>0.981</b> ± 0.288 | 0.705 | GCAAGCACACTTACAACAAATTTGTACTTGAAAAATACGGAAACAGCGCA    |
| chromosome | 203067 | BB_0202 |             | <b>0.594</b> ± 0.188 | 0.185 | <b>0.589</b> ± 0.514 | 0.460 | <b>0.894</b> ± 0.315 | 0.324 | <b>1.007</b> ± 0.473 | 0.951 | AGTGTGCTTGCTACAATGTTTGATATATTGTTGCCGATAAGAATAGTAGTA   |
| chromosome | 203255 | BB_0202 |             | <b>0.577</b> ± 0.201 | 0.082 | <b>0.660</b> ± 0.419 | 0.422 | <b>0.915</b> ± 0.218 | 0.200 | <b>0.841</b> ± 0.391 | 0.316 | TTAGTGGAGTAAATATAAAAAATTAATGGCTTTAAAAAAATGAAGTAGATA   |
| chromosome | 203260 | BB_0202 |             | <b>0.544</b> ± 0.194 | 0.120 | <b>0.607</b> ± 0.528 | 0.496 | <b>0.661</b> ± 0.318 | 0.045 | <b>0.978</b> ± 0.646 | 0.920 | TATAATAAACAAAATCATAAAAAAATATTAATCTCTTTAAAGTTAAGAC     |
| chromosome | 203310 | BB_0202 |             | <b>0.389</b> ± 0.158 | 0.129 | <b>0.486</b> ± 0.436 | 0.374 | <b>0.907</b> ± 0.554 | 0.172 | <b>1.020</b> ± 0.708 | 0.914 | GTCTTAATTTAAAGAGATTTAATATTTTTTTTATGATTTTGTATTATA      |
| chromosome | 203426 | BB_0202 |             | <b>0.412</b> ± 0.212 | 0.204 | <b>0.559</b> ± 0.584 | 0.484 | <b>0.920</b> ± 0.521 | 0.663 | <b>0.594</b> ± 0.266 | 0.280 | CTTGATCTATATCTAACATTTTTGCATAAATATTCTAGAGCTATTTTTTA    |
| chromosome | 203501 | BB_0202 |             | <b>0.296</b> ± 0.393 | 0.328 | <b>0.816</b> ± 1.278 | 0.851 | <b>1.279</b> ± 1.495 | 0.797 | <b>0.822</b> ± 0.862 | 0.800 | ATCAAATGATCAAAGAAGAGACTCTAGAATCTATATACAAGGA           |
| chromosome | 203538 | BB_0202 |             | <b>0.420</b> ± 0.296 | 0.207 | <b>0.653</b> ± 0.623 | 0.595 | <b>0.749</b> ± 0.359 | 0.291 | <b>0.798</b> ± 0.468 | 0.283 | GGAAATCTAGAGTATCCTTCTCTTTGATCAATTTGATTACATCTTTTACG    |
| chromosome | 203545 | BB_0202 |             | <b>0.441</b> ± 0.212 | 0.130 | <b>0.480</b> ± 0.445 | 0.394 | <b>0.904</b> ± 0.523 | 0.286 | <b>1.057</b> ± 0.599 | 0.343 | CAAAGGACAAAAGCAGAGAACAGATAATGGGATTTTTAATAGCCAAAGACCT  |
| chromosome | 203690 | BB_0202 |             | <b>0.477</b> ± 0.156 | 0.102 | <b>0.388</b> ± 0.344 | 0.236 | <b>0.822</b> ± 0.304 | 0.182 | <b>1.246</b> ± 0.559 | 0.060 | CTAGATATTATGAGGAAAAACAAAAAATATGGCAATCGTAATCGATGAA     |
| chromosome | 203697 | BB_0202 |             | <b>0.525</b> ± 0.180 | 0.132 | <b>0.510</b> ± 0.459 | 0.327 | <b>0.913</b> ± 0.483 | 0.741 | <b>1.104</b> ± 0.761 | 0.835 | TTATGAGGAAAAAACAAAAAATATGGCAATCGTAATCGATGAAATGGTG     |
| chromosome | 203768 | BB_0202 |             | <b>0.566</b> ± 0.658 | 0.479 | <b>1.180</b> ± 1.681 | 0.887 | <b>1.080</b> ± 1.198 | 0.703 | <b>1.805</b> ± 1.598 | 0.068 | TTGTAAGTATCCTTGAAAAACCACCATATTCATCGATTACGATTGCCATTA   |
| chromosome | 203771 | BB_0202 |             | <b>0.562</b> ± 0.462 | 0.206 | <b>0.719</b> ± 0.663 | 0.494 | <b>0.969</b> ± 0.151 | 0.786 | <b>1.347</b> ± 0.453 | 0.324 | GAAGACATAGTAGAAAAAATTTTGGAGCAATATCTGACGAATACGACATT    |
| chromosome | 203801 | BB_0202 |             | <b>0.500</b> ± 0.196 | 0.143 | <b>0.596</b> ± 0.540 | 0.497 | <b>0.994</b> ± 0.513 | 0.584 | <b>1.047</b> ± 0.486 | 0.361 | TTGCTCCAAAAATTTTTCTACTATGCTTCTATTGTAAGTATCCTTGAAA     |
| chromosome | 203804 | BB_0202 |             | <b>0.817</b> ± 0.647 | 0.567 | <b>0.806</b> ± 0.735 | 0.442 | <b>1.053</b> ± 0.606 | 0.839 | <b>1.485</b> ± 1.239 | 0.624 | TCTGACGAATACGACATTAAAGAGGAAAAAGCCTCTGATTACTCAAATCAAC  |
| chromosome | 203823 | BB_0202 |             | <b>0.489</b> ± 0.225 | 0.135 | <b>0.550</b> ± 0.453 | 0.439 | <b>0.785</b> ± 0.447 | 0.115 | <b>1.020</b> ± 0.626 | 0.818 | AAGAGGAAAAGCCTCTGATTACTCAAATCAACGACAATACTTACTCAATAC   |
| chromosome | 203844 | BB_0202 |             | <b>0.464</b> ± 0.149 | 0.097 | <b>0.550</b> ± 0.445 | 0.395 | <b>0.865</b> ± 0.399 | 0.031 | <b>1.011</b> ± 0.475 | 0.562 | CTCAAATCAACGACAATACTTACTCAAATCTGGGAAACTACTTTTGACG     |
| chromosome | 203859 | BB_0202 |             | <b>0.280</b> ± 0.133 | 0.060 | <b>0.170</b> ± 0.299 | 0.130 | <b>0.875</b> ± 0.660 | 0.551 | <b>1.208</b> ± 0.585 | 0.359 | TTGTCTGTTGATTTGAGTAATCAGAGGCTTTTCTCTTAAATGTCGTATTG    |
| chromosome | 203863 | BB_0202 |             | <b>0.469</b> ± 0.196 | 0.183 | <b>0.532</b> ± 0.489 | 0.433 | <b>0.909</b> ± 0.450 | 0.387 | <b>1.065</b> ± 0.591 | 0.063 | AGTATTGTCGTTGATTTGAGTAATCAGAGGCTTTTCTCTTAAATGTCGTA    |
| chromosome | 203866 | BB_0202 |             | <b>0.161</b> ± 0.114 | 0.042 | <b>0.279</b> ± 0.294 | 0.008 | <b>0.637</b> ± 0.631 | 0.536 | <b>1.181</b> ± 1.570 | 0.880 | CTCAATCTTGGGAAACTACTTTTGACGAGATTGAAGAGGCAATTTGGGAT    |
| chromosome | 203963 | BB_0202 |             | <b>0.421</b> ± 0.261 | 0.170 | <b>0.247</b> ± 0.220 | 0.098 | <b>1.043</b> ± 0.603 | 0.828 | <b>1.097</b> ± 1.124 | 0.867 | ATAGACTGCTTGACAAAAATCAACAAAAACGAAACCCGTAAAAAACAAAT    |
| chromosome | 203966 | BB_0202 |             | <b>0.418</b> ± 0.169 | 0.135 | <b>0.697</b> ± 0.619 | 0.631 | <b>0.813</b> ± 0.347 | 0.553 | <b>1.110</b> ± 0.499 | 0.294 | GATCTGCTTGACAAAAATCAACAAAAAACGAAACCCGTAAAAAACAAATGAT  |
| chromosome | 204236 | BB_0203 | <i>hflK</i> | <b>1.022</b> ± 0.718 | 0.951 | <b>0.806</b> ± 0.141 | 0.246 | <b>0.573</b> ± 0.213 | 0.110 | <b>0.310</b> ± 0.200 | 0.078 | TGAATATGTTTGCAATAACTATTATGATATTAGTATCAGGGTAATAATAA    |
| chromosome | 204383 | BB_0203 | <i>hflK</i> | <b>0.966</b> ± 0.149 | 0.041 | <b>1.003</b> ± 0.369 | 0.986 | <b>0.781</b> ± 0.216 | 0.121 | <b>1.033</b> ± 0.293 | 0.812 | GAAATCCAAATTTAATTTCTTGGACTATTTTACAGGTCAGATAAATTTTT    |
| chromosome | 204788 | BB_0203 | <i>hflK</i> | <b>0.733</b> ± 0.368 | 0.115 | <b>0.656</b> ± 0.368 | 0.424 | <b>0.495</b> ± 0.358 | 0.069 | <b>0.599</b> ± 0.543 | 0.033 | TGTATTTATTTTGTCTTGAATGCAATGTTTACATCTTCAAAGCTTCAT      |
| chromosome | 204791 | BB_0203 | <i>hflK</i> | <b>0.447</b> ± 0.432 | 0.125 | <b>0.823</b> ± 0.725 | 0.674 | <b>0.714</b> ± 0.311 | 0.140 | <b>0.827</b> ± 0.165 | 0.217 | AACGAAGGGAGAAAAAGATTTAATCAAATAGTCCCAAATCAAAGGTGAA     |
| chromosome | 204855 | BB_0203 | <i>hflK</i> | <b>0.864</b> ± 0.811 | 0.791 | <b>0.979</b> ± 0.833 | 0.974 | <b>0.785</b> ± 0.649 | 0.715 | <b>0.245</b> ± 0.263 | 0.247 | TTGAAGAAGCTAGAGGATATAAGAAAGCAGAATAAACATGCATTAGCAC     |
| chromosome | 205530 | BB_0204 | <i>hflC</i> | <b>0.714</b> ± 0.420 | 0.221 | <b>1.255</b> ± 0.644 | 0.325 | <b>0.734</b> ± 0.398 | 0.309 | <b>1.155</b> ± 0.615 | 0.435 | TTCAACGTTTGTCTAATGGAATCTACCCCAAGAAACAAAAATTAACG       |
| chromosome | 206092 | IG 26   |             | <b>1.277</b> ± 1.348 | 0.749 | <b>2.109</b> ± 1.404 | 0.195 | <b>1.046</b> ± 0.706 | 0.897 | <b>1.367</b> ± 1.646 | 0.707 | ATATATATTTTACAGGTATTTAAAGAAAAATTTATACTAATAAACTTCA     |
| chromosome | 206103 | IG 27   |             | <b>0.997</b> ± 1.157 | 0.998 | <b>1.344</b> ± 0.752 | 0.480 | <b>0.622</b> ± 0.241 | 0.110 | <b>0.861</b> ± 0.373 | 0.708 | ATAGATTAATAATATATTTTACAGGTATTTAAAGAAAAATTTACTACTA     |

|            |        |         |             |                      |       |                      |       |                      |       |                      |       |                                                      |
|------------|--------|---------|-------------|----------------------|-------|----------------------|-------|----------------------|-------|----------------------|-------|------------------------------------------------------|
| chromosome | 209624 | BB_0208 |             | <b>1.366</b> ± 0.660 | 0.440 | <b>1.447</b> ± 0.700 | 0.446 | <b>0.557</b> ± 0.595 | 0.370 | <b>0.852</b> ± 0.260 | 0.398 | TAGCATTCTCCAGCTTTACA AATAGAAAAACCTGAAATAATTGAAC T    |
| chromosome | 210000 | BB_0208 |             | <b>0.970</b> ± 0.347 | 0.670 | <b>1.821</b> ± 1.424 | 0.307 | <b>0.756</b> ± 0.253 | 0.171 | <b>0.977</b> ± 0.305 | 0.894 | TTGTTTTGTTCTAGGCTGCAATGTTAATATTGCTGGAAAAATTTAATATAA  |
| chromosome | 210003 | BB_0208 |             | <b>1.784</b> ± 1.413 | 0.465 | <b>1.615</b> ± 0.305 | 0.064 | <b>0.782</b> ± 0.573 | 0.452 | <b>1.026</b> ± 0.939 | 0.959 | GATATTCGGTAGCTGTAAGAAACAGAAATAAAAAATTTAAATTAATTAAT   |
| chromosome | 210347 | BB_0208 |             | <b>1.116</b> ± 0.253 | 0.065 | <b>2.044</b> ± 1.674 | 0.350 | <b>0.738</b> ± 0.140 | 0.051 | <b>1.059</b> ± 0.186 | 0.312 | ATTAAGCTAATAATTTTTACTCGAACCTTTATAAAAAATTTTCATTAAGACT |
| chromosome | 210754 | BB_0208 |             | <b>1.075</b> ± 0.785 | 0.737 | <b>1.655</b> ± 1.785 | 0.355 | <b>0.661</b> ± 0.700 | 0.441 | <b>1.802</b> ± 1.699 | 0.317 | ATAAGGATAAAAAATTTTTTGCAACGCATGAAAGAATTTTTCAAATCTA    |
| chromosome | 210886 | BB_0208 |             | <b>0.666</b> ± 0.421 | 0.221 | <b>1.540</b> ± 1.475 | 0.351 | <b>0.730</b> ± 0.579 | 0.038 | <b>1.512</b> ± 0.835 | 0.240 | TATCAGACATACTACTCTACCTTGACGAAAAATAAAATACAATACCTAAAA  |
| chromosome | 210897 | BB_0208 |             | <b>0.600</b> ± 0.630 | 0.223 | <b>0.316</b> ± 0.453 | 0.070 | <b>0.999</b> ± 0.775 | 0.998 | <b>0.451</b> ± 0.357 | 0.231 | GTATGCTGATATAAATTTGAAATGCTTATATTCAATATTTGGGTAAAAAG   |
| chromosome | 215548 | BB_0211 |             | <b>1.056</b> ± 0.592 | 0.806 | <b>0.722</b> ± 0.447 | 0.574 | <b>1.355</b> ± 0.801 | 0.279 | <b>0.894</b> ± 0.554 | 0.641 | CTAAAAATTGAGGTTTTCTGGAAGAGGGGGAATTCAAAAATCTTAATAA    |
| chromosome | 215595 | BB_0211 |             | <b>0.616</b> ± 0.330 | 0.344 | <b>0.985</b> ± 0.548 | 0.966 | <b>0.407</b> ± 0.191 | 0.077 | <b>0.626</b> ± 0.329 | 0.160 | TTAAGATTTTTGAAATCCCCCTTCTCAAGAAAAACCTCAATTTTAGTAG    |
| chromosome | 215802 | BB_0211 |             | <b>1.477</b> ± 0.260 | 0.016 | <b>1.608</b> ± 1.273 | 0.462 | <b>0.804</b> ± 0.184 | 0.338 | <b>1.141</b> ± 0.226 | 0.499 | GAAAAATGGAATTGAAAAATGCTTAAAAACAACCCGCCATAAACGGGAACA  |
| chromosome | 216112 | BB_0211 |             | <b>1.350</b> ± 1.189 | 0.164 | <b>1.959</b> ± 2.185 | 0.319 | <b>0.889</b> ± 0.636 | 0.716 | <b>1.218</b> ± 0.935 | 0.760 | TTGTCATGTTCTTTTTAAGACCCATAAATTTATTTTTCTATTACATTT     |
| chromosome | 216163 | BB_0211 |             | <b>0.781</b> ± 0.812 | 0.308 | <b>1.323</b> ± 1.458 | 0.501 | <b>0.171</b> ± 0.129 | 0.096 | <b>0.915</b> ± 0.620 | 0.857 | AAAGACATATTA AACATTTGTCAACAGAAGACCTATCGATCAAAAAGATC  |
| chromosome | 228894 | BB_0224 |             | <b>0.217</b> ± 0.105 | 0.058 | <b>0.444</b> ± 0.384 | 0.305 | <b>0.756</b> ± 0.337 | 0.252 | <b>0.814</b> ± 0.441 | 0.016 | TGTATATTGCTTTAATTACCAATACAATGATATTTGAAAAAATGAAAAACAG |
| chromosome | 228897 | BB_0224 |             | <b>0.545</b> ± 0.498 | 0.432 | <b>0.324</b> ± 0.549 | 0.410 | <b>0.946</b> ± 1.211 | 0.956 | <b>1.206</b> ± 1.213 | 0.537 | CATATTTAATAAAAAAGCTTTAATCTTAGATAAAATTTAAATTTTGTCTTT  |
| chromosome | 228901 | BB_0224 |             | <b>0.029</b> ± 0.051 | 0.069 | <b>0.749</b> ± 1.335 | 0.820 | <b>0.921</b> ± 0.836 | 0.918 | <b>1.022</b> ± 1.295 | 0.965 | TTAATAAAAAAGCTTTAATCTTAGATAAAATTTAAATTTTGTCTTTAATG   |
| chromosome | 228925 | BB_0224 |             | <b>0.271</b> ± 0.150 | 0.082 | <b>0.605</b> ± 0.591 | 0.011 | <b>0.610</b> ± 0.401 | 0.090 | <b>0.812</b> ± 0.481 | 0.354 | GATAAATTTAAATTTTGTCTTTAATGCCGTCATTAATCGAATCACTATTC   |
| chromosome | 229045 | BB_0224 |             | <b>0.267</b> ± 0.090 | 0.057 | <b>0.491</b> ± 0.410 | 0.294 | <b>0.839</b> ± 0.376 | 0.025 | <b>0.975</b> ± 0.418 | 0.845 | ATACAATTGCCATTTTAAATGACAATTCCTTTACTCTGCAAGAAATATA    |
| chromosome | 229152 | IG 28   |             | <b>0.326</b> ± 0.231 | 0.050 | <b>0.338</b> ± 0.400 | 0.227 | <b>0.478</b> ± 0.291 | 0.188 | <b>0.140</b> ± 0.124 | 0.062 | ACAATTCCTCTAAAAAAGAATAAATAATTGTTAAATCAGCTGTTTATTC    |
| chromosome | 233085 | BB_0228 |             | <b>2.145</b> ± 0.950 | 0.108 | <b>1.808</b> ± 1.198 | 0.407 | <b>0.870</b> ± 0.474 | 0.655 | <b>1.376</b> ± 0.848 | 0.507 | TGTTAATATTGACATTGCTTTTTCTTTTTATAAGGCCTTATTATGTATT    |
| chromosome | 233934 | BB_0228 |             | <b>0.525</b> ± 0.279 | 0.039 | <b>1.588</b> ± 1.218 | 0.519 | <b>0.481</b> ± 0.698 | 0.408 | <b>1.262</b> ± 0.503 | 0.008 | AAAGAGCTAAATCTACATTCCTTTAAGTTTAAAGAGTAAACAATATTTCAAT |
| chromosome | 240121 | BB_0235 | <i>ychF</i> | <b>1.107</b> ± 0.295 | 0.677 | <b>2.272</b> ± 2.083 | 0.401 | <b>1.260</b> ± 0.966 | 0.718 | <b>0.834</b> ± 0.596 | 0.515 | GTAGAGATCCCGATGAAAGGCTTTAAAAATCTCAGAGTGCATTATTCCA    |
| chromosome | 246612 | BB_0241 | <i>glpK</i> | <b>0.588</b> ± 0.301 | 0.131 | <b>0.912</b> ± 0.417 | 0.638 | <b>0.778</b> ± 0.467 | 0.316 | <b>1.037</b> ± 0.639 | 0.828 | TCTATTGATCAAGGTACTACTAGCTCGAGAGCAATGATTTTGTATAAAAAAT |
| chromosome | 247035 | BB_0241 | <i>glpK</i> | <b>0.520</b> ± 0.380 | 0.141 | <b>0.449</b> ± 0.267 | 0.125 | <b>0.533</b> ± 0.344 | 0.255 | <b>0.868</b> ± 0.507 | 0.772 | GAAGGTGCCAGACAAAGAGCCGAAAAATGGCGAATTATGCTTTGGAACAATA |
| chromosome | 247090 | BB_0241 | <i>glpK</i> | <b>0.537</b> ± 0.335 | 0.359 | <b>0.427</b> ± 0.506 | 0.432 | <b>0.865</b> ± 0.687 | 0.670 | <b>0.996</b> ± 0.673 | 0.982 | CATGGATATTGTGGAACCTGACTCAAAAAAAGAACATGCAACCGATTACT   |
| chromosome | 247989 | BB_0241 | <i>glpK</i> | <b>0.582</b> ± 0.579 | 0.192 | <b>0.752</b> ± 0.720 | 0.310 | <b>0.820</b> ± 0.761 | 0.657 | <b>0.721</b> ± 0.611 | 0.572 | GACAAGATATTTGAACTTCAATGCCAAAAAATCAAAAAGAAAAGCTTCTT   |
| chromosome | 248193 | BB_0242 |             | <b>0.562</b> ± 0.242 | 0.155 | <b>1.077</b> ± 0.565 | 0.286 | <b>0.655</b> ± 0.360 | 0.066 | <b>0.849</b> ± 0.504 | 0.250 | TGTTGTTTTAGTTTTCAAAAAATCAAATAAATATGCTATAATTTTGTACCA  |
| chromosome | 248355 | BB_0242 |             | <b>0.016</b> ± 0.034 | 0.290 | <b>1.242</b> ± 1.936 | 0.834 | <b>0.548</b> ± 0.859 | 0.624 | <b>0.349</b> ± 0.583 | 0.328 | TTAATCATTTTTTGATTGCTCCAATGAATTTACCTTTTCAAAAGTTTA     |
| chromosome | 248358 | BB_0242 |             | <b>0.848</b> ± 0.178 | 0.231 | <b>1.618</b> ± 1.158 | 0.437 | <b>0.575</b> ± 0.380 | 0.289 | <b>0.622</b> ± 0.125 | 0.073 | TTATTAATCATTTTTTGATTGCTCCAATGAATTTACCTTTTCAAAAGGT    |
| chromosome | 248421 | BB_0242 |             | <b>0.406</b> ± 0.617 | 0.122 | <b>1.190</b> ± 1.331 | 0.681 | <b>0.716</b> ± 0.872 | 0.286 | <b>0.714</b> ± 0.687 | 0.561 | GTGCTATTCAATAAAATTAACAACAATGGCTTTTCGAATTTCTCAATCT    |
| chromosome | 248862 | BB_0243 |             | <b>0.783</b> ± 0.991 | 0.664 | <b>0.258</b> ± 0.300 | 0.240 | <b>0.420</b> ± 0.470 | 0.287 | <b>1.271</b> ± 1.303 | 0.526 | ATAAGGTATTTCTAAACATTATAAATAGGCGTGATAAGTGACATTCGTT    |
| chromosome | 249253 | BB_0243 |             | <b>0.377</b> ± 0.295 | 0.203 | <b>0.782</b> ± 0.676 | 0.438 | <b>0.616</b> ± 0.616 | 0.130 | <b>0.691</b> ± 0.546 | 0.364 | AACATCATTAAACCTTCCCAAGGTAGCCATTAGTAGTCAAAAAAGACAAA   |
| chromosome | 249494 | BB_0243 |             | <b>0.616</b> ± 0.643 | 0.254 | <b>1.708</b> ± 1.392 | 0.334 | <b>0.582</b> ± 0.712 | 0.321 | <b>0.601</b> ± 0.458 | 0.293 | AAATAGAAAAATCAGATGTA AAAAGTGATATACCCGGAATAAGGCCATTAA |
| chromosome | 249623 | BB_0243 |             | <b>0.405</b> ± 0.406 | 0.183 | <b>0.907</b> ± 1.019 | 0.093 | <b>0.653</b> ± 0.749 | 0.111 | <b>0.850</b> ± 0.989 | 0.021 | ATAAGATTTGAATCTGATATAAATATTTTTGCTTTCTTGAGATTTTTGAA   |
| chromosome | 249691 | BB_0243 |             | <b>0.364</b> ± 0.286 | 0.120 | <b>0.764</b> ± 0.572 | 0.174 | <b>0.521</b> ± 0.403 | 0.101 | <b>0.730</b> ± 0.570 | 0.113 | GAACAAAATTTAATACCAATCGTGACCAACTACAGAAGATTTAAAGTTG    |
| chromosome | 249968 | BB_0243 |             | <b>0.335</b> ± 0.297 | 0.004 | <b>0.846</b> ± 0.525 | 0.326 | <b>0.504</b> ± 0.464 | 0.035 | <b>0.972</b> ± 1.005 | 0.951 | GCTTGAGGATTTAAAGGTAGTGATCTTGTTCTTCTTGCTAAAACATCCTCA  |
| chromosome | 259040 | BB_0252 |             | <b>0.837</b> ± 0.580 | 0.650 | <b>3.642</b> ± 3.196 | 0.169 | <b>1.294</b> ± 1.155 | 0.682 | <b>1.985</b> ± 1.929 | 0.248 | TATCACAATATTTATCTTAATFACTATTTTTAGGATTTTTTTGAAAA      |
| chromosome | 259588 | BB_0252 |             | <b>2.835</b> ± 1.630 | 0.176 | <b>3.257</b> ± 2.883 | 0.257 | <b>0.627</b> ± 0.745 | 0.415 | <b>0.927</b> ± 1.500 | 0.939 | AGATTTTTCTCTTACTATTAATCCCCGTAAGATACAACCTTTAAATCGT    |
| chromosome | 259793 | BB_0252 |             | <b>0.111</b> ± 0.081 | 0.167 | <b>0.319</b> ± 0.492 | 0.300 | <b>0.501</b> ± 0.439 | 0.334 | <b>0.714</b> ± 1.173 | 0.804 | AGTAAAAACAATCATTGAAGTTTCTGGCACTGTAATAGGGGATGTACAAGC  |
| chromosome | 260736 | BB_0252 |             | <b>0.931</b> ± 0.896 | 0.813 | <b>1.051</b> ± 1.199 | 0.880 | <b>0.502</b> ± 0.515 | 0.038 | <b>0.661</b> ± 0.479 | 0.366 | TCAATTTCTCAGGTGTTATGATAAGGTATTAATAGCTAAAACAATGGTAA   |
| chromosome | 260771 | BB_0252 |             | <b>0.071</b> ± 0.068 | 0.074 | <b>0.690</b> ± 0.618 | 0.436 | <b>0.104</b> ± 0.153 | 0.103 | <b>0.217</b> ± 0.233 | 0.137 | GCTATTAATCCTTATCATAAACCTGAGAAATGATATTTATTTTCT        |
| chromosome | 260797 | BB_0252 |             | <b>0.453</b> ± 0.280 | 0.037 | <b>0.735</b> ± 0.666 | 0.348 | <b>0.617</b> ± 0.448 | 0.275 | <b>0.679</b> ± 0.423 | 0.193 | TAACCTGTTCTTTACCATTGTTTTAGCTATTAATACCTTATCATAAACAC   |
| chromosome | 261085 | BB_0252 |             | <b>1.734</b> ± 0.558 | 0.077 | <b>2.747</b> ± 2.377 | 0.324 | <b>1.540</b> ± 0.674 | 0.335 | <b>1.399</b> ± 0.829 | 0.406 | TTTAATGGAATATTGCAAAATCTATTTCTGTGGAAATAGGATTTTAACT    |
| chromosome | 261262 | BB_0252 |             | <b>1.114</b> ± 1.377 | 0.868 | <b>1.428</b> ± 1.745 | 0.651 | <b>0.715</b> ± 0.990 | 0.653 | <b>1.432</b> ± 1.325 | 0.679 | AAGCTAGCCTCAAACAACAATTTAAAAAATTAACAATAATTTAATGAC     |
| chromosome | 261265 | BB_0252 |             | <b>0.937</b> ± 0.268 | 0.771 | <b>1.533</b> ± 0.980 | 0.451 | <b>0.706</b> ± 0.118 | 0.105 | <b>0.990</b> ± 0.270 | 0.962 | GCTTTACTAGGTTTAAATAAATAAATAATGGAAGAAGAGTTAGTG        |
| chromosome | 266112 | BB_0254 | <i>recJ</i> | <b>0.955</b> ± 0.546 | 0.742 | <b>1.382</b> ± 0.563 | 0.106 | <b>0.631</b> ± 0.535 | 0.429 | <b>0.764</b> ± 0.562 | 0.620 | TAGAATACAAAAAGCCCTACTTATCTGTGTATTTCTAGGAATAGAAAAAT   |
| chromosome | 266183 | BB_0255 |             | <b>1.140</b> ± 0.853 | 0.549 | <b>1.853</b> ± 1.584 | 0.278 | <b>0.812</b> ± 0.421 | 0.358 | <b>1.266</b> ± 0.760 | 0.268 | GTATTTATTTCTGAATTTATATTTCTATTCTAGAAATACACAGTATA      |
| chromosome | 267275 | BB_0256 | <i>rpsU</i> | <b>0.767</b> ± 0.208 | 0.011 | <b>1.418</b> ± 1.070 | 0.533 | <b>0.723</b> ± 0.181 | 0.093 | <b>0.736</b> ± 0.148 | 0.046 | GATCGCACAGAGATGTTCAAATGGATATCTCTTTATTTAAATTAACACC    |
| chromosome | 273890 | BB_0261 |             | <b>0.463</b> ± 0.411 | 0.205 | <b>1.026</b> ± 1.176 | 0.974 | <b>0.625</b> ± 0.860 | 0.566 | <b>0.766</b> ± 0.744 | 0.745 | CTGTCATGAAGAGATTAATATAAATAGTGACAACACTCGATTGCTCCTA    |
| chromosome | 275622 | BB_0262 |             | <b>1.110</b> ± 0.559 | 0.711 | <b>1.959</b> ± 0.948 | 0.179 | <b>0.669</b> ± 0.622 | 0.583 | <b>1.776</b> ± 0.941 | 0.125 | AAAGTCTCCCTAATACCTCTTTAAAAAATCTTTGGGCAATCTTCCCCA     |

|            |        |         |                      |                      |                      |                      |                      |                      |                      |                      |                                                       |                                                     |
|------------|--------|---------|----------------------|----------------------|----------------------|----------------------|----------------------|----------------------|----------------------|----------------------|-------------------------------------------------------|-----------------------------------------------------|
| chromosome | 277304 | BB_0264 | <b>0.966</b> ± 1.165 | 0.952                | <b>1.778</b> ± 2.562 | 0.566                | <b>0.865</b> ± 0.833 | 0.192                | <b>0.492</b> ± 0.579 | 0.132                | TAGGTAGGTTTTCTTTGGCAATATTCAAAAAGCTTTAAAAGGAATCCCA     |                                                     |
| chromosome | 277777 | BB_0264 | <b>0.526</b> ± 0.677 | 0.297                | <b>1.182</b> ± 1.381 | 0.741                | <b>0.605</b> ± 0.632 | 0.533                | <b>0.528</b> ± 0.638 | 0.342                | ATTCAAATGCTTGCCATCAAGAAAAAGCAAAGTATGTGCACCTCTCCAT     |                                                     |
| chromosome | 278129 | BB_0264 | <b>1.039</b> ± 0.428 | 0.746                | <b>0.761</b> ± 0.424 | 0.084                | <b>0.598</b> ± 0.275 | 0.110                | <b>0.767</b> ± 0.578 | 0.321                | ATGAACCAACCCGACGTGCTATTGCTTATGCCTTTGAAAGACAGATTGATG   |                                                     |
| chromosome | 278206 | BB_0264 | <b>0.711</b> ± 0.291 | 0.119                | <b>1.448</b> ± 0.879 | 0.401                | <b>0.986</b> ± 0.478 | 0.931                | <b>0.913</b> ± 0.423 | 0.499                | GGCAGGGACTGTTATTACAGCATTTTCACTCTCTCTCAAAAATTTTTTC     |                                                     |
| chromosome | 278432 | BB_0264 | <b>0.471</b> ± 0.311 | 0.116                | <b>0.621</b> ± 0.366 | 0.045                | <b>0.468</b> ± 0.158 | 0.114                | <b>0.401</b> ± 0.149 | 0.113                | TCTGAGAAAGAAACAATAGAAGGGGTTATTGCTCCACCCCTTTCATTTAAT   |                                                     |
| chromosome | 278481 | BB_0264 | <b>0.761</b> ± 1.045 | 0.824                | <b>1.083</b> ± 1.667 | 0.952                | <b>1.433</b> ± 1.471 | 0.667                | <b>2.792</b> ± 2.767 | 0.001                | ATATTATCTTAGAACCTAACATCAAAATACGATGCAACAGTATTTGTGGTTC  |                                                     |
| chromosome | 279215 | BB_0266 | <b>1.088</b> ± 0.230 | 0.568                | <b>1.672</b> ± 0.416 | 0.102                | <b>0.813</b> ± 0.068 | 0.024                | <b>1.147</b> ± 0.222 | 0.392                | GTTAATAAAGTAGGGGATAATTTATTGCTTTCGTTTCCAGTTAAAAAAAAT   |                                                     |
| chromosome | 279477 | BB_0267 | <b>0.526</b> ± 0.582 | 0.123                | <b>1.277</b> ± 1.616 | 0.699                | <b>0.996</b> ± 1.024 | 0.996                | <b>3.763</b> ± 4.488 | 0.315                | ACAACGTTACTTTTATAGAGGATGATAATTATTTAAAGTTATGACCTATA    |                                                     |
| chromosome | 303742 | IG 29   | <b>0.292</b> ± 0.135 | 0.021                | <b>0.402</b> ± 0.161 | 0.022                | <b>2.149</b> ± 0.763 | 0.047                | <b>0.388</b> ± 0.168 | 0.019                | TTGAAACCTCCCTCATTTTAAAATTTGCTTTTAACTAAATATATAAATAATTC |                                                     |
| chromosome | 303902 | BB_0295 | <i>hslU</i>          | <b>1.310</b> ± 0.643 | 0.464                | <b>1.248</b> ± 1.150 | 0.762                | <b>0.859</b> ± 0.425 | 0.547                | <b>0.674</b> ± 0.420 | 0.446                                                 | TTTCCATAACACCGTGAAGTCTTCTGGCACCAGATTTTCACTCTCAAGAT  |
| chromosome | 305051 | BB_0295 | <i>hslU</i>          | <b>0.090</b> ± 0.124 | 0.195                | <b>0.499</b> ± 0.485 | 0.390                | <b>0.469</b> ± 0.716 | 0.520                | <b>1.220</b> ± 1.317 | 0.840                                                 | GGTCAAGACGAAGCTAAAAAATTAGTATCAATTGCTCTTGTAAATAGATAT |
| chromosome | 305483 | BB_0296 | <b>0.668</b> ± 0.613 | 0.152                | <b>1.778</b> ± 2.117 | 0.613                | <b>0.801</b> ± 0.819 | 0.771                | <b>0.767</b> ± 0.749 | 0.766                | CTCTTTTTGAAAAATTTGAAGAAAAATCAAAGCAAAGGTGATGGCTTGA     |                                                     |
| chromosome | 305705 | BB_0297 | <b>0.100</b> ± 0.197 | 0.276                | <b>0.292</b> ± 0.420 | 0.388                | <b>0.361</b> ± 0.536 | 0.398                | <b>0.817</b> ± 0.995 | 0.725                | AGAACATCAGATACATTTTTACAATTTACAACACTCTTTGAATCATCTTCA   |                                                     |
| chromosome | 305884 | BB_0297 | <b>0.908</b> ± 0.510 | 0.694                | <b>1.321</b> ± 1.117 | 0.729                | <b>0.734</b> ± 0.420 | 0.341                | <b>0.925</b> ± 0.600 | 0.867                | AACATCAAGTCTAAGTCAAGACCAAGCTCAGCTGTAATTAAGTCTCTGA     |                                                     |
| chromosome | 305947 | BB_0297 | <b>1.814</b> ± 1.404 | 0.029                | <b>3.968</b> ± 4.993 | 0.390                | <b>1.959</b> ± 1.815 | 0.446                | <b>2.658</b> ± 2.815 | 0.265                | TGCACCCTGAAATCAGGAGCTTTAATTAACAGCTGAGCTTGTCTTGACTT    |                                                     |
| chromosome | 306377 | BB_0297 | <b>0.845</b> ± 0.365 | 0.089                | <b>0.964</b> ± 0.692 | 0.950                | <b>1.230</b> ± 0.717 | 0.663                | <b>1.388</b> ± 0.892 | 0.586                | GGATAAGACTTAGACCCTAGAATAGCAACTTTGGCTTGTGCTTTGAATA     |                                                     |
| chromosome | 306539 | BB_0297 | <b>0.720</b> ± 0.544 | 0.586                | <b>0.841</b> ± 0.584 | 0.614                | <b>1.136</b> ± 0.619 | 0.798                | <b>0.706</b> ± 0.407 | 0.529                | AAATCAAAATTTAAAAAGTTTTAATTTTTCTTGCCTTTAAAAATTTTC      |                                                     |
| chromosome | 321686 | BB_0315 | <b>1.203</b> ± 1.627 | 0.790                | <b>1.219</b> ± 1.564 | 0.643                | <b>1.000</b> ± 1.531 | 1.000                | <b>0.144</b> ± 0.271 | 0.210                | TCTCTGGGCATACTTTTAATAGGAGAAGTAAAAAATCAATGGACTATA      |                                                     |
| chromosome | 321865 | BB_0315 | <b>1.072</b> ± 0.977 | 0.915                | <b>1.437</b> ± 1.021 | 0.550                | <b>0.859</b> ± 0.321 | 0.566                | <b>0.921</b> ± 0.369 | 0.774                | TCTTCAACGTTTCAATTAGCACTCAATGACGACACATTGTTTATAATTTTT   |                                                     |
| chromosome | 322438 | BB_0316 | <b>0.935</b> ± 1.196 | 0.942                | <b>0.659</b> ± 0.742 | 0.567                | <b>1.748</b> ± 1.023 | 0.223                | <b>0.698</b> ± 0.328 | 0.028                | TAACATAAACAGTAATAAAATAAAAAATGAAAAAACAGCAATAAAAAACAA   |                                                     |
| chromosome | 326309 | IG 30   | <b>0.427</b> ± 0.544 | 0.423                | <b>0.249</b> ± 0.308 | 0.134                | <b>1.054</b> ± 0.826 | 0.919                | <b>1.540</b> ± 1.959 | 0.409                | ATAAAAGGATGTTTTATTTTTATGAGTAAAAAGGTGTTTTTAAAGGGTTT    |                                                     |
| chromosome | 327693 | BB_0322 | <b>0.405</b> ± 0.418 | 0.095                | <b>0.421</b> ± 0.379 | 0.310                | <b>0.649</b> ± 0.496 | 0.439                | <b>1.120</b> ± 1.033 | 0.443                | GTGTTGTAGAAATACATTTCCCGTTAAGTTAGATTAGATGACGAAATTTT    |                                                     |
| chromosome | 327715 | BB_0322 | <b>0.644</b> ± 1.045 | 0.703                | <b>0.479</b> ± 0.542 | 0.505                | <b>0.856</b> ± 0.712 | 0.747                | <b>3.224</b> ± 3.623 | 0.222                | AAAGAAATAGAAGGTAGAGTTAGTGTGTTAGAAATACATTTCCCGTTAAG    |                                                     |
| chromosome | 334910 | IG 31   | <b>0.877</b> ± 0.723 | 0.719                | <b>1.002</b> ± 0.679 | 0.997                | <b>0.631</b> ± 0.392 | 0.182                | <b>1.345</b> ± 0.826 | 0.591                | TATAAAATATTGAAAAGGAAAATCCCATGAAATATAAAAAATAGCCTTA     |                                                     |
| chromosome | 335200 | BB_0328 | <b>0.835</b> ± 0.841 | 0.727                | <b>1.167</b> ± 1.586 | 0.284                | <b>0.714</b> ± 0.842 | 0.426                | <b>1.023</b> ± 1.219 | 0.892                | CACATTTAACCTAAGAGAAGATATAGTTGGAGCGATGGAGTTGCCATTAC    |                                                     |
| chromosome | 335210 | BB_0328 | <b>0.555</b> ± 0.367 | 0.142                | <b>0.721</b> ± 0.503 | 0.222                | <b>0.542</b> ± 0.361 | 0.142                | <b>0.788</b> ± 0.645 | 0.021                | GGTTAAATGTGAAATAATCCATCTTCAGAAATATCCAACTTTTTGCAA      |                                                     |
| chromosome | 335333 | BB_0328 | <b>0.619</b> ± 0.313 | 0.211                | <b>1.361</b> ± 0.498 | 0.297                | <b>0.844</b> ± 0.408 | 0.473                | <b>1.022</b> ± 0.419 | 0.948                | TTGTAGATTTTTATAAATAGCATACATTCAGCTGTTTTTTTTATTTAAAA    |                                                     |
| chromosome | 335795 | BB_0328 | <b>0.597</b> ± 0.536 | 0.385                | <b>0.889</b> ± 0.872 | 0.626                | <b>0.498</b> ± 0.401 | 0.334                | <b>0.686</b> ± 0.806 | 0.067                | GCATTCAATACAACAATAAACCACTAGACAATTTAAAGTTAGACAAGCC     |                                                     |
| chromosome | 335960 | BB_0328 | <b>0.768</b> ± 0.654 | 0.670                | <b>1.182</b> ± 1.433 | 0.507                | <b>0.616</b> ± 0.685 | 0.184                | <b>1.046</b> ± 1.168 | 0.798                | TTAAATTTTTCCATAAGAATAATCATCAAAATTTGGAGTTAGATTTCTTG    |                                                     |
| chromosome | 336408 | BB_0328 | <b>0.707</b> ± 1.012 | 0.468                | <b>1.701</b> ± 2.921 | 0.353                | <b>0.505</b> ± 0.657 | 0.473                | <b>0.668</b> ± 1.084 | 0.306                | TACCCAAATCTCATATCTTTTCAGAAATGATAAATGGACAGGGTGGGTAC    |                                                     |
| chromosome | 336523 | IG 32   | <b>0.842</b> ± 0.708 | 0.476                | <b>1.153</b> ± 0.698 | 0.799                | <b>0.904</b> ± 0.721 | 0.840                | <b>0.724</b> ± 0.467 | 0.419                | TTTTACTTAATTTTATTTATTTTTAGTTTTTAAATATCTTCAATAAATAGCT  |                                                     |
| chromosome | 337151 | BB_0329 | <b>1.026</b> ± 0.536 | 0.888                | <b>1.195</b> ± 0.776 | 0.349                | <b>0.686</b> ± 0.325 | 0.391                | <b>0.880</b> ± 0.746 | 0.584                | ACATATCAATAAAATAAAGTTTTGGTGATCCAGTGTTATTTCTAATGTTT    |                                                     |
| chromosome | 337852 | BB_0329 | <b>0.414</b> ± 0.183 | 0.032                | <b>1.033</b> ± 0.719 | 0.902                | <b>0.685</b> ± 0.329 | 0.020                | <b>0.731</b> ± 0.407 | 0.056                | TGTTGTCATCTTCGTTTTCAAGTTCACATCAATTTTAAATTTTTTTT       |                                                     |
| chromosome | 337856 | BB_0329 | <b>1.198</b> ± 1.109 | 0.825                | <b>1.263</b> ± 1.541 | 0.748                | <b>0.309</b> ± 0.477 | 0.261                | <b>1.559</b> ± 1.370 | 0.413                | AGTATGTTGCCATCTTCGTTTTCAAGTTCACATCAATTTTAAATTTTT      |                                                     |
| chromosome | 338107 | BB_0329 | <b>0.590</b> ± 0.386 | 0.366                | <b>0.761</b> ± 0.528 | 0.537                | <b>0.292</b> ± 0.178 | 0.074                | <b>0.702</b> ± 0.502 | 0.550                | TATTGGTGCTATTGGAAAATCTTTTCAATAATTATCTTCTGCTTGTCT      |                                                     |
| chromosome | 340285 | IG 33   | <b>0.605</b> ± 0.789 | 0.284                | <b>0.801</b> ± 1.335 | 0.416                | <b>0.367</b> ± 0.371 | 0.375                | <b>0.986</b> ± 1.088 | 0.968                | TATGATATAATTGACTAATACGTAAGTTATCAATATCTATTACAAGGAG     |                                                     |
| chromosome | 344196 | BB_0336 | <b>0.867</b> ± 0.241 | 0.107                | <b>1.208</b> ± 0.654 | 0.478                | <b>0.684</b> ± 0.172 | 0.077                | <b>0.899</b> ± 0.227 | 0.239                | AGTAAGCTTTTAAATTTATCTGTTTCATCTCATCAAAAAGGTATTTAGAT    |                                                     |
| chromosome | 344355 | BB_0336 | <b>0.745</b> ± 0.748 | 0.720                | <b>0.286</b> ± 0.328 | 0.292                | <b>0.552</b> ± 0.392 | 0.184                | <b>0.951</b> ± 0.674 | 0.831                | GTATAAATCCCTTATTGCTCTTTCTCAATAAGCCTATTTAAAAAGGA       |                                                     |
| chromosome | 352512 | BB_0344 | <b>0.902</b> ± 1.421 | 0.886                | <b>1.599</b> ± 1.800 | 0.474                | <b>0.670</b> ± 0.635 | 0.283                | <b>0.713</b> ± 0.541 | 0.386                | ATAAAAGGATGAAATTTTTAGTTTTTCAAAGCACTTCAGATGAAGCTGAAT   |                                                     |
| chromosome | 355454 | IG 34   | <b>0.918</b> ± 0.800 | 0.417                | <b>1.950</b> ± 2.514 | 0.418                | <b>1.005</b> ± 0.755 | 0.977                | <b>0.898</b> ± 0.729 | 0.756                | GATATAAACACCTTGAAAGAATTAGGATTTGATAAAAATGCTTTGGAAATTA  |                                                     |
| chromosome | 355857 | BB_0347 | <b>0.866</b> ± 0.281 | 0.354                | <b>1.927</b> ± 0.831 | 0.083                | <b>0.902</b> ± 0.388 | 0.301                | <b>1.311</b> ± 0.462 | 0.151                | TATTGGCGGAGGATGGCCACAATTTAATAAATAAGATAATCATATCTTTTT   |                                                     |
| chromosome | 355864 | BB_0347 | <b>0.450</b> ± 0.383 | 0.156                | <b>0.779</b> ± 0.693 | 0.662                | <b>1.025</b> ± 0.411 | 0.932                | <b>0.991</b> ± 0.200 | 0.955                | GCTATTATATTGGCGGAGGATGGCCACAATTTAATAAATAAGATAATCATA   |                                                     |
| chromosome | 356641 | BB_0347 | <b>0.538</b> ± 0.349 | 0.251                | <b>0.796</b> ± 0.818 | 0.096                | <b>0.611</b> ± 0.371 | 0.266                | <b>1.116</b> ± 0.783 | 0.317                | CAAGAGATTATCTGGAGCTTATGTTTTTAAAAATCAAAAAATAAAAA       |                                                     |
| chromosome | 366967 | BB_0359 | <b>1.559</b> ± 0.115 | 0.014                | <b>1.885</b> ± 1.768 | 0.480                | <b>0.606</b> ± 0.153 | 0.018                | <b>0.968</b> ± 0.595 | 0.933                | ATTACCTAATTTAGACAATACTCACAAGCTGTTTTTAAAACCTTGTGATA    |                                                     |
| chromosome | 368613 | BB_0360 | <b>0.574</b> ± 0.478 | 0.480                | <b>0.785</b> ± 0.732 | 0.714                | <b>1.670</b> ± 1.442 | 0.221                | <b>1.626</b> ± 1.741 | 0.514                | AATGTTAACATAAACTTTATGGAGTAATTTAATGAAAAATTAATTTATTA    |                                                     |
| chromosome | 368735 | BB_0360 | <b>0.981</b> ± 0.176 | 0.665                | <b>1.014</b> ± 0.362 | 0.963                | <b>0.638</b> ± 0.238 | 0.028                | <b>0.906</b> ± 0.137 | 0.482                | ATGTTAATATTATTGGAATAATTTAGTTATTACTATAATGCTGTGAAGAA    |                                                     |
| chromosome | 368760 | BB_0360 | <b>0.860</b> ± 0.964 | 0.652                | <b>3.228</b> ± 4.507 | 0.353                | <b>0.715</b> ± 0.981 | 0.375                | <b>0.687</b> ± 0.991 | 0.143                | TTTTAAAAATATACGCTCTCAAACCTCTCAGCCATAATTTTGAAGAAATTA   |                                                     |
| chromosome | 369224 | BB_0361 | <b>0.612</b> ± 0.351 | 0.391                | <b>1.302</b> ± 0.694 | 0.599                | <b>0.770</b> ± 0.857 | 0.713                | <b>1.327</b> ± 0.662 | 0.064                | AGTAATCATATTTTAAAGATTTTAAATTTTTTATTGATTTTTTTTTGGG     |                                                     |
| chromosome | 369552 | BB_0361 | <b>1.054</b> ± 0.681 | 0.883                | <b>1.863</b> ± 2.022 | 0.396                | <b>0.715</b> ± 0.720 | 0.374                | <b>1.160</b> ± 0.775 | 0.491                | ATATGCTCAAAGCTCCCAAGACATTGAAAAACCGAAAAAATAAAAAAT      |                                                     |

|            |        |         |             |                            |                            |                            |                            |                                                       |
|------------|--------|---------|-------------|----------------------------|----------------------------|----------------------------|----------------------------|-------------------------------------------------------|
| chromosome | 369706 | BB_0361 |             | <b>0.150</b> ± 0.144 0.011 | <b>1.313</b> ± 1.435 0.705 | <b>0.458</b> ± 0.425 0.221 | <b>0.955</b> ± 0.454 0.795 | CAAACCTACAAGCTCAACTTCTAAAAGTATAAAAAAATTGCAAAAAAATT    |
| chromosome | 371284 | BB_0363 |             | <b>0.540</b> ± 0.480 0.422 | <b>2.875</b> ± 4.052 0.303 | <b>0.665</b> ± 0.777 0.246 | <b>0.578</b> ± 0.663 0.382 | GAATGGATTTTGTTCGATTTTTTAATTCGTTTGAATGTTTATTGAAAAA     |
| chromosome | 371287 | BB_0363 |             | <b>1.193</b> ± 0.670 0.711 | <b>1.764</b> ± 1.026 0.324 | <b>1.200</b> ± 0.592 0.585 | <b>1.398</b> ± 0.605 0.351 | TCATAATTAGCAAAGAAAAATTTGATGAGGAATATTTAAAACTTGATCACA   |
| chromosome | 371367 | BB_0363 |             | <b>0.761</b> ± 0.460 0.603 | <b>0.735</b> ± 0.646 0.663 | <b>0.017</b> ± 0.029 0.052 | <b>0.402</b> ± 0.603 0.131 | GAATATAAGCAAAGCTTAATACATCAAAAAAAGCATATTTTGGCAGATAAAA  |
| chromosome | 371416 | BB_0363 |             | <b>0.742</b> ± 0.665 0.548 | <b>1.771</b> ± 2.822 0.640 | <b>0.478</b> ± 0.551 0.247 | <b>0.640</b> ± 0.750 0.374 | AAAACACAACCTCTGGATTTCTTTTTAAATTTATCAGAACTCATAAAAAGAAA |
| chromosome | 371577 | BB_0363 |             | <b>0.808</b> ± 0.402 0.170 | <b>0.761</b> ± 0.412 0.601 | <b>0.905</b> ± 0.433 0.467 | <b>1.081</b> ± 0.584 0.111 | TGTCGGTTACTTTGATTATATTTCCAGAGGTTTTTCATTGGAAGATTAAAGAT |
| chromosome | 371580 | BB_0363 |             | <b>1.835</b> ± 1.759 0.502 | <b>0.313</b> ± 0.227 0.246 | <b>1.004</b> ± 0.938 0.972 | <b>0.378</b> ± 0.384 0.224 | GATATCAGAGATTGGGAAAAGCTAGAAAAAATAAATTTAAGTTATCACACA   |
| chromosome | 371865 | BB_0363 |             | <b>1.415</b> ± 1.101 0.576 | <b>1.161</b> ± 0.858 0.804 | <b>0.404</b> ± 0.391 0.338 | <b>0.838</b> ± 0.723 0.503 | GTAACCATATGGATATTTTCAAAAAAAGCATATTTACTTAATTTA         |
| chromosome | 372009 | BB_0363 |             | <b>0.949</b> ± 0.538 0.661 | <b>2.126</b> ± 2.463 0.451 | <b>0.734</b> ± 0.350 0.021 | <b>1.020</b> ± 0.516 0.837 | ATGACATTATTTTTGAATACATTATTTAAGTATTTTTGTCATTAAGTTTTT   |
| chromosome | 372271 | BB_0363 |             | <b>0.974</b> ± 0.123 0.580 | <b>1.779</b> ± 0.756 0.239 | <b>0.866</b> ± 0.178 0.126 | <b>1.092</b> ± 0.333 0.625 | GTGGGATTAGATTCCTTGTATTCGATGATATTTTTGTAGCCATCATAAT     |
| chromosome | 372273 | BB_0363 |             | <b>0.673</b> ± 0.741 0.674 | <b>4.224</b> ± 7.109 0.447 | <b>1.279</b> ± 2.334 0.791 | <b>2.320</b> ± 3.836 0.521 | TAGTGGGATTAGATTCCTTGTATTCGATGATATTTTTGTAGCCATCATA     |
| chromosome | 373080 | IG 35   |             | <b>1.264</b> ± 0.446 0.494 | <b>2.263</b> ± 0.625 0.014 | <b>1.321</b> ± 0.785 0.613 | <b>1.530</b> ± 0.487 0.229 | TGCCTAAATTTTAAATTTCAACAAAAATATTTTACATTGAAAAAGGA       |
| chromosome | 373580 | BB_0365 | <i>la7</i>  | <b>1.170</b> ± 0.388 0.143 | <b>1.550</b> ± 1.102 0.434 | <b>0.728</b> ± 0.273 0.015 | <b>1.032</b> ± 0.302 0.800 | TGTTAACGAATTAATTTATATTTTTGTGATTTTATGAGCCTTAATCTAAATTA |
| chromosome | 374015 | BB_0365 | <i>la7</i>  | <b>0.513</b> ± 0.247 0.103 | <b>0.445</b> ± 0.405 0.341 | <b>0.723</b> ± 0.321 0.258 | <b>0.882</b> ± 0.449 0.343 | GAATCATCAGGCTTAGAAGAGTTCTCCGCTCTGTCTCAACATATTCA       |
| chromosome | 387433 | BB_0377 | <i>luxS</i> | <b>0.719</b> ± 0.315 0.063 | <b>1.375</b> ± 1.084 0.465 | <b>0.714</b> ± 0.254 0.157 | <b>0.828</b> ± 0.397 0.151 | TTGTAGTAAATATTACATTTTCAAAGGTATCTTTTCTTGAGACATATATGC   |
| chromosome | 387491 | BB_0377 | <i>luxS</i> | <b>1.034</b> ± 0.646 0.696 | <b>1.818</b> ± 1.961 0.367 | <b>0.635</b> ± 0.443 0.091 | <b>0.950</b> ± 0.512 0.832 | TGTATTGCTGCGTTTTCAATTTATGGTTCGATGTTGGGAGCTTTGATTCTA   |
| chromosome | 387744 | BB_0377 | <i>luxS</i> | <b>0.838</b> ± 0.431 0.293 | <b>1.185</b> ± 0.291 0.269 | <b>0.785</b> ± 0.286 0.012 | <b>0.755</b> ± 0.187 0.266 | TGAATCTTAAATACTTACAAATATTAACAATATTAAGAAGAAAAATTT      |
| chromosome | 388124 | BB_0378 |             | <b>0.912</b> ± 0.517 0.818 | <b>1.396</b> ± 1.001 0.147 | <b>0.804</b> ± 0.469 0.219 | <b>1.877</b> ± 1.486 0.131 | ATTACCATACATTTCTCAGTGAAAAATGAAACATCTTTTATGAAATAATT    |
| chromosome | 388213 | BB_0378 |             | <b>1.566</b> ± 1.582 0.451 | <b>1.635</b> ± 1.551 0.496 | <b>1.742</b> ± 1.612 0.271 | <b>1.666</b> ± 1.162 0.339 | TTTATGTTGGATGATCAAGCATATTTGAAGCATTCTCAAATTTATTCATA    |
| chromosome | 388229 | BB_0378 |             | <b>0.854</b> ± 0.429 0.275 | <b>1.477</b> ± 1.513 0.503 | <b>0.631</b> ± 0.356 0.062 | <b>0.839</b> ± 0.537 0.171 | TACCAATGAGATTATATTTATGTTGGATGATCAAGCATATTTGAAGCATTC   |
| chromosome | 388328 | BB_0378 |             | <b>0.854</b> ± 0.555 0.746 | <b>1.278</b> ± 1.008 0.728 | <b>0.827</b> ± 1.238 0.738 | <b>0.393</b> ± 0.337 0.334 | TCAATTTTTCAGTGGAGTTGGTGTTAATGTTTCTCAAATTTAGCATTTGG    |
| chromosome | 391873 | IG 36   |             | <b>1.204</b> ± 0.310 0.153 | <b>1.008</b> ± 0.525 0.978 | <b>0.436</b> ± 0.202 0.117 | <b>1.049</b> ± 0.762 0.937 | AATATAACATAATTAAAAAATTAACAACTGGAATAATTAATCTTTCTATT    |
| chromosome | 394232 | BB_0384 | <i>bmpC</i> | <b>1.412</b> ± 0.881 0.505 | <b>1.863</b> ± 0.796 0.038 | <b>0.959</b> ± 0.491 0.802 | <b>1.159</b> ± 0.509 0.396 | AGGATCCCGATGTTTTAAACAATAGGTTGGTTGATGAAGTTATTGATCTAG   |
| chromosome | 394997 | BB_0384 | <i>bmpC</i> | <b>0.450</b> ± 0.464 0.361 | <b>0.481</b> ± 0.495 0.511 | <b>0.668</b> ± 0.678 0.539 | <b>0.479</b> ± 0.527 0.421 | GGGATAATTTGGAAATAAGCTTATAACTAAATCTTTAAGACCTTATCTTA    |
| chromosome | 410663 | IG 37   |             | <b>0.768</b> ± 0.303 0.298 | <b>1.079</b> ± 0.314 0.602 | <b>0.791</b> ± 0.251 0.297 | <b>0.871</b> ± 0.245 0.563 | TGACCACAAAAACGTTGAAAAATAATCTTATAATGACCTATAATAAATGTT   |
| chromosome | 411699 | BB_0400 |             | <b>0.813</b> ± 0.849 0.776 | <b>0.676</b> ± 0.839 0.538 | <b>0.406</b> ± 0.591 0.477 | <b>0.819</b> ± 0.898 0.603 | ATATTGGCCTGTAATTCCTGTTCCATCCACCTAAAAAGCTTGCTCTTT      |
| chromosome | 411730 | BB_0400 |             | <b>0.393</b> ± 0.399 0.074 | <b>0.665</b> ± 0.712 0.065 | <b>0.897</b> ± 0.841 0.617 | <b>1.212</b> ± 1.150 0.344 | GGTGGATGGAACAGGAATTAACAGCCAATTAACGATTAATTTATGTTAAAT   |
| chromosome | 411815 | BB_0400 |             | <b>1.254</b> ± 1.851 0.559 | <b>1.079</b> ± 1.341 0.931 | <b>0.218</b> ± 0.367 0.301 | <b>0.891</b> ± 1.092 0.827 | TAGGTATTAATTTTTACCCTACCATTGCTCTGTTTTAACATCAATTG       |
| chromosome | 411817 | BB_0400 |             | <b>1.000</b> ± 0.252 0.998 | <b>1.101</b> ± 0.196 0.520 | <b>0.686</b> ± 0.124 0.118 | <b>0.818</b> ± 0.215 0.408 | GGTATTAATTTTTACCCTACCATTGCTCTGTTTTAACATCAATTGAT       |
| chromosome | 412681 | BB_0400 |             | <b>0.915</b> ± 0.497 0.269 | <b>1.574</b> ± 1.373 0.412 | <b>0.717</b> ± 0.279 0.119 | <b>0.680</b> ± 0.322 0.020 | GATTTGCCGCACCTATTCCAATGCACCTGGATCTGAAATTCAGCTATTA     |
| chromosome | 416911 | BB_0404 |             | <b>0.757</b> ± 0.635 0.700 | <b>1.059</b> ± 0.702 0.847 | <b>0.809</b> ± 0.537 0.542 | <b>0.949</b> ± 0.642 0.841 | TTACTACTTGACTGTATATTGATGTTAATCTGTTTGTGTAAGGAT         |
| chromosome | 417114 | BB_0405 |             | <b>0.719</b> ± 0.534 0.539 | <b>0.786</b> ± 0.348 0.510 | <b>0.567</b> ± 0.294 0.063 | <b>0.694</b> ± 0.238 0.029 | ATAGCATTCTCATTGAAATTCCTTTTTTATTTCAATTTTAGAAATTA       |
| chromosome | 417567 | BB_0405 |             | <b>0.697</b> ± 0.290 0.160 | <b>1.186</b> ± 0.986 0.758 | <b>0.556</b> ± 0.365 0.202 | <b>0.982</b> ± 0.482 0.935 | ATAGAGTACAGCTTTCTAAAAATATTGATGATTGAAATTAAGCTGTTGCT    |
| chromosome | 417570 | BB_0405 |             | <b>0.949</b> ± 0.719 0.938 | <b>0.982</b> ± 0.407 0.953 | <b>0.641</b> ± 0.431 0.140 | <b>0.503</b> ± 0.364 0.281 | GAGTACAGCTTTCTAAAAATATTGATGATTGAAATTAAGCTGTTGCTACT    |
| chromosome | 417879 | BB_0406 |             | <b>0.378</b> ± 0.736 0.448 | <b>0.017</b> ± 0.027 0.196 | <b>0.039</b> ± 0.070 0.202 | <b>0.009</b> ± 0.008 0.191 | ATTTTTCTTTCTTTTATTTCTTAAAGCTTTGGGATACAGGTTGGTTGAATC   |
| chromosome | 418056 | BB_0406 |             | <b>0.789</b> ± 0.220 0.239 | <b>1.480</b> ± 0.870 0.294 | <b>0.799</b> ± 0.265 0.011 | <b>0.913</b> ± 0.521 0.654 | TGTCCAATTTGCTTTTTAAAAATAACGCTATTCCACCATTTAGATAAAT     |
| chromosome | 419412 | BB_0407 | <i>manA</i> | <b>1.735</b> ± 0.879 0.269 | <b>1.821</b> ± 0.407 0.074 | <b>0.002</b> ± 0.004 0.000 | <b>1.982</b> ± 0.338 0.043 | AGATTGATGGAAAGCCCAAGGCTGAAATGTGGCTGGAGCACACAAGACAT    |
| chromosome | 420551 | BB_0408 |             | <b>1.773</b> ± 1.688 0.272 | <b>0.777</b> ± 0.795 0.544 | <b>0.094</b> ± 0.071 0.171 | <b>0.838</b> ± 0.710 0.708 | AAGCTCGGTTGCAACAGGCAAAGGTAGTTTTATAAATATTTAATGAGTG     |
| chromosome | 420791 | BB_0408 |             | <b>0.814</b> ± 0.548 0.541 | <b>0.945</b> ± 0.903 0.648 | <b>0.002</b> ± 0.002 0.110 | <b>0.722</b> ± 0.479 0.571 | ATGCTATAACCCCTGCTTTTAGCTTCATTTCAATTTTCTAGCTGCAATA     |
| chromosome | 421350 | BB_0408 |             | <b>1.346</b> ± 0.380 0.083 | <b>1.559</b> ± 0.605 0.300 | <b>0.002</b> ± 0.003 0.023 | <b>0.864</b> ± 0.260 0.550 | CAAGACTTTTTTCAAAAAATTAACAAACATAACTGGTCTCCAGTAAAT      |
| chromosome | 421406 | IG 38   |             | <b>0.960</b> ± 1.099 0.946 | <b>1.351</b> ± 1.763 0.215 | <b>0.342</b> ± 0.398 0.402 | <b>0.516</b> ± 0.816 0.266 | TGTTTAATTACTAGGAGACCACAGTTATGTTTTTAAATTTTTGAAAAAAG    |
| chromosome | 422726 | BB_0411 |             | <b>0.453</b> ± 0.186 0.072 | <b>1.163</b> ± 1.081 0.756 | <b>0.689</b> ± 0.350 0.314 | <b>1.250</b> ± 0.637 0.547 | ATTTTTCAAGTTTTAGCCAAATCCAGAATTAATTCGCTTTTTGAGGTG      |
| chromosome | 422757 | BB_0411 |             | <b>0.767</b> ± 0.306 0.001 | <b>1.193</b> ± 0.336 0.367 | <b>0.738</b> ± 0.311 0.009 | <b>0.821</b> ± 0.351 0.043 | TATCCTTTGAGATTGCCCTCTCTACTAATTTTTCAAGTTTTAGCCAA       |
| chromosome | 422885 | BB_0411 |             | <b>0.417</b> ± 0.196 0.090 | <b>0.834</b> ± 0.591 0.265 | <b>0.386</b> ± 0.259 0.176 | <b>0.998</b> ± 0.745 0.998 | ACTCTTTTTATATCCCAAATGAAAAAGCAAAGACTTGGATTGGAAAAAT     |
| chromosome | 423338 | BB_0412 |             | <b>0.761</b> ± 0.820 0.758 | <b>0.668</b> ± 0.518 0.516 | <b>0.619</b> ± 0.679 0.142 | <b>0.615</b> ± 0.359 0.411 | CATTAGACCCATTTTTAATCTCTGAAGATTTTTTTTTAAAAACAATCTAA    |
| chromosome | 423470 | BB_0412 |             | <b>0.427</b> ± 0.424 0.343 | <b>1.117</b> ± 1.644 0.695 | <b>0.547</b> ± 0.499 0.423 | <b>0.584</b> ± 0.592 0.361 | TATAAAGTGAAGAAAAATAAATTTAATAATGAAAAAGTGTTCACAAAAAGG   |
| chromosome | 423472 | BB_0412 |             | <b>0.839</b> ± 0.524 0.286 | <b>1.043</b> ± 0.612 0.911 | <b>0.759</b> ± 0.251 0.204 | <b>1.015</b> ± 0.408 0.959 | TATATAAAGTGAAGAAAAATAAATTTAATAATGAAAAAGTGTTCACAAAA    |
| chromosome | 423539 | BB_0412 |             | <b>1.171</b> ± 0.732 0.032 | <b>1.822</b> ± 0.981 0.242 | <b>0.523</b> ± 0.425 0.041 | <b>1.764</b> ± 1.055 0.010 | TATATGAGGCAAGATCAAAATAATGTAATTTGTAATGATTGATTTT        |
| chromosome | 423554 | BB_0412 |             | <b>0.608</b> ± 0.692 0.078 | <b>1.122</b> ± 1.034 0.818 | <b>0.433</b> ± 0.599 0.316 | <b>1.056</b> ± 0.825 0.932 | GGCATTGTGTAATATATGAGGCAAGATCAAAATAATGTAATTTGTA        |



|            |        |         |                      |       |                      |       |                      |       |                      |       |                                                       |
|------------|--------|---------|----------------------|-------|----------------------|-------|----------------------|-------|----------------------|-------|-------------------------------------------------------|
| chromosome | 481500 | BB_0460 | <b>0.815</b> ± 0.885 | 0.832 | <b>3.126</b> ± 3.824 | 0.384 | <b>0.642</b> ± 1.129 | 0.632 | <b>0.989</b> ± 0.961 | 0.990 | TCTTGAAAGATTGTTGTGAATTTTTTCCAATCTTTTTGACTGTGTTT       |
| chromosome | 481558 | BB_0460 | <b>0.897</b> ± 1.063 | 0.884 | <b>1.200</b> ± 1.206 | 0.835 | <b>0.534</b> ± 0.432 | 0.397 | <b>1.110</b> ± 1.137 | 0.856 | ACATAAAAAATCTTTAAATCTACTATTAGCTGTCTTTTAAACGTTTTATT    |
| chromosome | 481910 | BB_0460 | <b>0.461</b> ± 0.345 | 0.166 | <b>0.652</b> ± 0.669 | 0.538 | <b>1.150</b> ± 0.701 | 0.705 | <b>0.912</b> ± 0.797 | 0.808 | TATGGAGAATATTATTGTTTTGCAGTATTTTCATTTCTTTGATATTTTTAG   |
| chromosome | 485312 | IG 44   | <b>0.904</b> ± 0.559 | 0.740 | <b>2.753</b> ± 2.126 | 0.276 | <b>0.839</b> ± 0.376 | 0.666 | <b>1.432</b> ± 0.716 | 0.372 | AGGGTAATTTACAACCTATTCCCTTTAAGAGATAGTACTATAAAAAATTAAC  |
| chromosome | 492227 | IG 45   | <b>0.821</b> ± 0.601 | 0.421 | <b>0.629</b> ± 0.423 | 0.295 | <b>0.399</b> ± 0.435 | 0.275 | <b>0.501</b> ± 0.524 | 0.056 | AAAAATAAAATCAAATCAGAAATACCTCTCTGCAAATTTTTATCAATCT     |
| chromosome | 494403 | BB_0475 | <b>0.858</b> ± 0.522 | 0.681 | <b>1.233</b> ± 1.202 | 0.704 | <b>0.675</b> ± 0.414 | 0.178 | <b>0.731</b> ± 0.483 | 0.530 | GCACATAAAAAATCAACCAAAAAAGTAGAAATAGTAACTACAAATCCGACA   |
| chromosome | 494479 | BB_0475 | <b>1.147</b> ± 1.135 | 0.838 | <b>0.306</b> ± 0.255 | 0.026 | <b>1.130</b> ± 0.941 | 0.805 | <b>1.047</b> ± 0.411 | 0.810 | ATTGTTTTATGTCTTGCATGAAAACAAGCACAATAAAATCAAAGAAAAAT    |
| chromosome | 494783 | IG 46   | <b>0.671</b> ± 0.380 | 0.192 | <b>1.098</b> ± 0.601 | 0.821 | <b>0.789</b> ± 0.441 | 0.509 | <b>0.759</b> ± 0.343 | 0.492 | TATGTGTAGTGAATTGATTTAAAAGTTAAAGCGTATTGACTAATTTTTGT    |
| chromosome | 511099 | BB_0505 | <b>0.176</b> ± 0.176 | 0.149 | <b>0.551</b> ± 0.610 | 0.207 | <b>0.386</b> ± 0.588 | 0.351 | <b>0.599</b> ± 0.517 | 0.379 | TGTTTGCTTATTTAGGTAATCATTTTTTTGCAATTAGAATACACATGATT    |
| chromosome | 511102 | BB_0505 | <b>0.176</b> ± 0.183 | 0.269 | <b>0.478</b> ± 0.924 | 0.609 | <b>0.875</b> ± 0.867 | 0.839 | <b>0.489</b> ± 0.733 | 0.590 | TATCTTAAGGCCAAATAATTTTTCAGATTTGTAGATGGGCATGGTTATTG    |
| chromosome | 511104 | BB_0505 | <b>0.323</b> ± 0.300 | 0.213 | <b>0.680</b> ± 0.691 | 0.501 | <b>0.940</b> ± 0.448 | 0.885 | <b>0.467</b> ± 0.357 | 0.060 | TCTTAAGGCCAAATAATTTTTCAGATTTGTTAGATGGGCATGGTTATTGTT   |
| chromosome | 511389 | BB_0505 | <b>0.506</b> ± 0.392 | 0.189 | <b>0.746</b> ± 0.808 | 0.078 | <b>1.031</b> ± 0.884 | 0.832 | <b>1.059</b> ± 0.954 | 0.142 | TGACTCAAGATGAAAGAATATTGTCAAAGGGGACAGCCTATATTAGTGATA   |
| chromosome | 511426 | BB_0505 | <b>0.459</b> ± 0.327 | 0.044 | <b>0.792</b> ± 0.869 | 0.687 | <b>2.016</b> ± 1.817 | 0.282 | <b>1.188</b> ± 0.761 | 0.148 | GGCTGTCCCTTTGACAATATTCTTTCATCTTGAAGTACATAACATGGGTATG  |
| chromosome | 511429 | BB_0505 | <b>0.594</b> ± 0.268 | 0.012 | <b>0.762</b> ± 0.682 | 0.531 | <b>0.901</b> ± 0.199 | 0.513 | <b>0.846</b> ± 0.191 | 0.279 | TATTAGTGATATTGGGATGACAGGTGGATTAATTTCTGTAATAGGATTTAA   |
| chromosome | 511431 | BB_0505 | <b>0.489</b> ± 0.263 | 0.045 | <b>0.719</b> ± 0.674 | 0.216 | <b>1.040</b> ± 0.650 | 0.730 | <b>0.933</b> ± 0.517 | 0.206 | TTAGTGATATTGGGATGACAGGTGGATTAATTTCTGTAATAGGATTTAATC   |
| chromosome | 511578 | BB_0505 | <b>0.351</b> ± 0.322 | 0.078 | <b>0.727</b> ± 0.793 | 0.150 | <b>0.914</b> ± 0.821 | 0.346 | <b>0.758</b> ± 0.647 | 0.256 | ATTTAAAGACAGGCCCGCTTTAAAAATGAAAGGATTCAGAAATAATTTTA    |
| chromosome | 527312 | IG 47   | <b>1.302</b> ± 1.502 | 0.713 | <b>5.557</b> ± 6.761 | 0.350 | <b>0.491</b> ± 0.706 | 0.349 | <b>2.387</b> ± 3.590 | 0.501 | ATAAAAACTATTTAAAAATTTCTAACTCAACAGATGCAATAAACCCCTT     |
| chromosome | 527735 | BB_0516 | <b>0.990</b> ± 1.458 | 0.954 | <b>1.346</b> ± 1.278 | 0.605 | <b>0.423</b> ± 0.513 | 0.260 | <b>1.562</b> ± 1.689 | 0.382 | GATCTTGTAATTACTACTCAAAAAACGAGCGCAAAAGACAATTAACAGTT    |
| chromosome | 531910 | IG 48   | <b>0.885</b> ± 0.575 | 0.073 | <b>1.490</b> ± 1.345 | 0.378 | <b>0.673</b> ± 0.338 | 0.156 | <b>1.050</b> ± 0.563 | 0.456 | TAAGAATATTTTTGGTATCATTTTTTTGATTTTGTGTGTTTTAGTGCTTT    |
| chromosome | 533659 | IG 49   | <b>0.686</b> ± 0.891 | 0.609 | <b>1.176</b> ± 1.606 | 0.836 | <b>0.929</b> ± 1.086 | 0.816 | <b>1.810</b> ± 2.064 | 0.417 | TTAATAATATTTTTGCTGGAAAAATGAAAAATAGCTTTTTAAGTTAAAA     |
| chromosome | 533745 | IG 50   | <b>1.496</b> ± 1.401 | 0.632 | <b>1.306</b> ± 0.980 | 0.656 | <b>1.025</b> ± 0.609 | 0.963 | <b>2.124</b> ± 1.308 | 0.237 | TGCTATTAACAGATTTAAAGGTATAAAAACTAATTTTAACTTAAAAAG      |
| chromosome | 533790 | IG 51   | <b>1.166</b> ± 0.579 | 0.705 | <b>1.125</b> ± 1.089 | 0.854 | <b>0.679</b> ± 0.404 | 0.361 | <b>1.175</b> ± 0.790 | 0.608 | TTAATATTTAATTTTTATGTTTGGACAGCTTAAATAACACAAAGCTCTTT    |
| chromosome | 533824 | IG 52   | <b>0.362</b> ± 0.297 | 0.220 | <b>0.591</b> ± 0.472 | 0.510 | <b>0.235</b> ± 0.200 | 0.167 | <b>0.923</b> ± 0.771 | 0.898 | AATAACACAAGTCTTTTTAAGTGTTAAATCATGTCAATAATTTATTATTG    |
| chromosome | 534361 | BB_0524 | <b>2.852</b> ± 1.778 | 0.007 | <b>2.855</b> ± 2.793 | 0.217 | <b>1.542</b> ± 1.549 | 0.652 | <b>2.602</b> ± 1.906 | 0.039 | AGTGGTTGTGCTAAATTAATTTAGATTTTAAATCTGATGGGTCTATTGTA    |
| chromosome | 534851 | BB_0524 | <b>1.406</b> ± 1.927 | 0.611 | <b>0.102</b> ± 0.187 | 0.076 | <b>0.951</b> ± 1.010 | 0.886 | <b>0.758</b> ± 1.390 | 0.675 | TGAGAAGAAATATCAAGATTAATAACCTTATAATAGACCTTGAAACTGCA    |
| chromosome | 535234 | BB_0525 | <b>1.136</b> ± 0.346 | 0.568 | <b>1.664</b> ± 0.925 | 0.398 | <b>1.094</b> ± 0.382 | 0.755 | <b>1.021</b> ± 0.474 | 0.884 | GCTTGTTAAGTCCAGCTTAAAAATTTATGTAAGCATTTTAAATGGAT       |
| chromosome | 538411 | BB_0528 | <b>0.698</b> ± 0.085 | 0.045 | <b>0.959</b> ± 0.150 | 0.524 | <b>0.801</b> ± 0.180 | 0.141 | <b>0.809</b> ± 0.229 | 0.249 | CTTTATCATAATTTCTGCTTTAAATGAATTAACGTTTGATTACATAAT      |
| chromosome | 539372 | BB_0530 | <b>1.533</b> ± 1.687 | 0.555 | <b>0.830</b> ± 0.981 | 0.855 | <b>0.373</b> ± 0.551 | 0.450 | <b>0.496</b> ± 0.614 | 0.372 | GTTTGTTAATATTTTTAGCAATTTTTCTTTATTAATACTCTATTTATTC     |
| chromosome | 539539 | BB_0530 | <b>0.547</b> ± 0.247 | 0.133 | <b>1.150</b> ± 0.625 | 0.748 | <b>0.885</b> ± 0.470 | 0.544 | <b>1.043</b> ± 0.481 | 0.863 | AATAGTTTTGAAGCAATGCTTGTCATGTGAGTATCCATTGGCACTATAAGC   |
| chromosome | 539787 | BB_0530 | <b>0.393</b> ± 0.187 | 0.067 | <b>0.582</b> ± 0.372 | 0.113 | <b>0.641</b> ± 0.625 | 0.335 | <b>0.607</b> ± 0.547 | 0.420 | TTATAAAACCAAGATTTTATACTTAGCATAGATGAATTAATAAAGCATAT    |
| chromosome | 540125 | BB_0530 | <b>0.717</b> ± 0.367 | 0.057 | <b>1.247</b> ± 0.734 | 0.428 | <b>0.938</b> ± 0.514 | 0.794 | <b>1.253</b> ± 0.317 | 0.127 | TTCAAAATACAATAAAAAAAATTTATACACTCTGATCCCTTTAGAATTTCT   |
| chromosome | 540183 | BB_0531 | <b>0.784</b> ± 0.744 | 0.717 | <b>0.272</b> ± 0.317 | 0.042 | <b>0.816</b> ± 0.737 | 0.711 | <b>1.384</b> ± 0.969 | 0.546 | TTCTAATAGTTCTAATAATATTTTTTAAAGTTTTTGTGCTGAAAGTTTGT    |
| chromosome | 541213 | BB_0532 | <b>0.719</b> ± 0.444 | 0.558 | <b>0.844</b> ± 0.663 | 0.026 | <b>0.658</b> ± 0.410 | 0.502 | <b>0.769</b> ± 0.542 | 0.242 | GATGCAATATCAGCTTTTTCATTAAGGATATTGGCAGGCTCAATTAATAG    |
| chromosome | 541438 | BB_0532 | <b>1.427</b> ± 1.013 | 0.589 | <b>1.423</b> ± 1.229 | 0.661 | <b>1.200</b> ± 0.917 | 0.779 | <b>1.379</b> ± 1.218 | 0.552 | AGTAAAAACAGAAATCATATAGTTTTTGGTTATTGCTAATAAGGGCTTTTTTA |
| chromosome | 544951 | BB_0536 | <b>0.979</b> ± 0.679 | 0.951 | <b>1.239</b> ± 1.271 | 0.525 | <b>0.622</b> ± 0.616 | 0.024 | <b>0.842</b> ± 0.837 | 0.221 | ATAAGTGAATCAAACTAGTAGCAGCATTAAATGTCAGCACCAATGTCAT     |
| chromosome | 545430 | BB_0536 | <b>0.518</b> ± 0.680 | 0.620 | <b>0.284</b> ± 0.575 | 0.473 | <b>0.492</b> ± 0.585 | 0.444 | <b>1.386</b> ± 1.482 | 0.603 | GGCTCTCAACTTCCAAATCTTCTAAAAGTAAAAATTTATCTCTAAGCTCT    |
| chromosome | 547074 | BB_0536 | <b>1.176</b> ± 1.161 | 0.692 | <b>2.295</b> ± 2.779 | 0.137 | <b>0.834</b> ± 0.869 | 0.655 | <b>0.891</b> ± 0.998 | 0.690 | CTACCGAGCCTAAGGAGCTGGACAATGTCTTAAATCTTAAATCGCTATA     |
| chromosome | 548301 | BB_0537 | <b>0.818</b> ± 0.224 | 0.324 | <b>1.077</b> ± 0.406 | 0.491 | <b>0.564</b> ± 0.179 | 0.058 | <b>0.845</b> ± 0.248 | 0.307 | TTGCTAGCATCTAAGTTACTAGGATTTAGTCGAATTTCTTCTAACGTT      |
| chromosome | 553011 | BB_0542 | <b>0.892</b> ± 0.471 | 0.358 | <b>1.080</b> ± 0.713 | 0.594 | <b>0.768</b> ± 0.526 | 0.166 | <b>0.845</b> ± 0.825 | 0.600 | AGAGTTAATTTTTAAGTTTTTTTGTACTTTTTGCTTGGGTAATCTTTA      |
| chromosome | 562118 | IG 53   | <b>0.992</b> ± 1.098 | 0.989 | <b>0.528</b> ± 0.532 | 0.407 | <b>0.600</b> ± 0.389 | 0.171 | <b>1.246</b> ± 0.923 | 0.714 | GTAAGTCGGTTTTTGTCTTGTAGAATTGTTGATAGAAAATAAAGAAATA     |
| chromosome | 562121 | IG 54   | <b>0.536</b> ± 0.232 | 0.029 | <b>0.512</b> ± 0.421 | 0.343 | <b>0.736</b> ± 0.278 | 0.100 | <b>0.936</b> ± 0.422 | 0.049 | AAGTCGGTTTTTGTCTTGTAGAATTGTTGATAAAAATAAAGAAATATGT     |
| chromosome | 564192 | BB_0553 | <b>0.843</b> ± 0.851 | 0.817 | <b>1.136</b> ± 1.186 | 0.828 | <b>0.151</b> ± 0.082 | 0.079 | <b>0.101</b> ± 0.180 | 0.125 | AATAAAAATAAACACTTTTATCCAATACTAAGTAACTTTTTATGCTTT      |
| chromosome | 564240 | BB_0553 | <b>1.262</b> ± 1.450 | 0.314 | <b>1.500</b> ± 1.640 | 0.175 | <b>0.680</b> ± 0.672 | 0.409 | <b>0.918</b> ± 0.848 | 0.838 | ATTCCTAGTTCGTGGATATTTTTGACTCTTATTAAGTTCTAAAAATTTCT    |
| chromosome | 564404 | BB_0553 | <b>1.095</b> ± 0.174 | 0.520 | <b>1.212</b> ± 0.521 | 0.586 | <b>0.911</b> ± 0.280 | 0.524 | <b>0.983</b> ± 0.237 | 0.923 | CTATATTGAAATAGATCCCACTAACAATTTAAATGAGGCTTTAAAAATCA    |
| chromosome | 564472 | BB_0553 | <b>0.986</b> ± 0.409 | 0.887 | <b>1.442</b> ± 1.074 | 0.445 | <b>0.750</b> ± 0.176 | 0.217 | <b>0.987</b> ± 0.320 | 0.867 | TGTCAGGGTAGATTTGAAAATCTGCTGTTTTTATCATAGTTGTTTTGGGG    |
| chromosome | 564832 | BB_0553 | <b>0.634</b> ± 0.222 | 0.090 | <b>1.352</b> ± 0.236 | 0.121 | <b>0.512</b> ± 0.435 | 0.179 | <b>0.796</b> ± 0.456 | 0.545 | AAAAGAAAAATCAGCGCAATGAAGCAATAAACAAAGAAAAATCAAAAAAA    |
| chromosome | 565683 | IG 55   | <b>0.771</b> ± 0.157 | 0.106 | <b>1.025</b> ± 0.500 | 0.952 | <b>0.320</b> ± 0.108 | 0.008 | <b>0.667</b> ± 0.161 | 0.027 | AGGTCCTGTTTTTATTAGAAAACATCTATAATTTATAATGTTAGCATAA     |
| chromosome | 565712 | IG 56   | <b>1.527</b> ± 0.618 | 0.332 | <b>1.389</b> ± 0.730 | 0.483 | <b>0.812</b> ± 0.204 | 0.281 | <b>1.065</b> ± 0.337 | 0.267 | TAGATGTTTTCTGAATAAAAAACAAGGACCTTATGAATAAAAAACAAAAATCG |
| chromosome | 565713 | IG 57   | <b>0.964</b> ± 0.874 | 0.826 | <b>1.117</b> ± 0.947 | 0.753 | <b>0.976</b> ± 0.489 | 0.941 | <b>0.867</b> ± 0.680 | 0.581 | TAATTTAATGTTAGCATAATTTGTCCATTTATCAAAAGAGATAAAAAATA    |

|            |        |         |                      |       |                      |       |                      |       |                      |       |                                                       |
|------------|--------|---------|----------------------|-------|----------------------|-------|----------------------|-------|----------------------|-------|-------------------------------------------------------|
| chromosome | 566271 | BB_0554 | <b>1.710</b> ± 1.947 | 0.536 | <b>1.722</b> ± 2.066 | 0.194 | <b>1.523</b> ± 1.434 | 0.519 | <b>1.247</b> ± 1.531 | 0.168 | GTTATTCCTCTGGATTTCACAAAGAAAGAGTCTGGAACCTGCAATGTTTTGA  |
| chromosome | 566514 | BB_0554 | <b>0.288</b> ± 0.325 | 0.140 | <b>1.197</b> ± 1.567 | 0.879 | <b>0.846</b> ± 1.405 | 0.898 | <b>0.225</b> ± 0.270 | 0.127 | GACCAGTAATTTATCAAGAGAATTTATTTTTTTTGTCTTTACTTACACCA    |
| chromosome | 567281 | BB_0554 | <b>0.266</b> ± 0.338 | 0.397 | <b>0.948</b> ± 1.141 | 0.852 | <b>0.541</b> ± 1.071 | 0.705 | <b>0.923</b> ± 1.062 | 0.939 | ATACACTCTCGCCTATCAAAAATTTTACTGCTATAAGGCCAAGCCAGTG     |
| chromosome | 567598 | BB_0554 | <b>0.749</b> ± 0.419 | 0.167 | <b>0.914</b> ± 0.547 | 0.451 | <b>0.638</b> ± 0.452 | 0.028 | <b>0.929</b> ± 0.540 | 0.383 | ATCAACCGCTAATCCAAATATTTGGCGAATTTCTTTGTTATTTGCTTAAG    |
| chromosome | 567801 | BB_0554 | <b>0.718</b> ± 0.263 | 0.239 | <b>0.871</b> ± 0.368 | 0.557 | <b>0.635</b> ± 0.272 | 0.130 | <b>0.773</b> ± 0.291 | 0.188 | CTCCAATATTTAAAATTTCTTCAAATCAAGGGGCGTTTTGCTGCATTA      |
| chromosome | 567987 | BB_0555 | <b>0.759</b> ± 0.207 | 0.132 | <b>1.639</b> ± 1.254 | 0.490 | <b>1.099</b> ± 0.723 | 0.846 | <b>0.827</b> ± 0.203 | 0.392 | AATCAGAATAAAACAAGTTTGAATCCAATAAAAATAAAAAAATCTGTTAT    |
| chromosome | 568020 | BB_0555 | <b>0.602</b> ± 0.108 | 0.022 | <b>0.965</b> ± 0.187 | 0.710 | <b>0.625</b> ± 0.102 | 0.041 | <b>0.778</b> ± 0.211 | 0.033 | CATTCGACCAATTTAAAATAAAGCGGGAAATTAATCAGAATAAAACAAGTT   |
| chromosome | 568210 | BB_0555 | <b>0.346</b> ± 0.209 | 0.101 | <b>0.777</b> ± 0.221 | 0.195 | <b>0.226</b> ± 0.150 | 0.038 | <b>0.288</b> ± 0.113 | 0.043 | CAATACATTTTAAATGACTTTCTATAGCCTAAAATATGTTATTTGCTTACA   |
| chromosome | 568222 | BB_0555 | <b>0.436</b> ± 0.218 | 0.096 | <b>0.898</b> ± 0.792 | 0.815 | <b>0.526</b> ± 0.376 | 0.110 | <b>0.807</b> ± 0.386 | 0.285 | ATACTTTTTATCTCTTTATTTGAAAGCTGAAGAATTGATAGAAAAATG      |
| chromosome | 568582 | BB_0556 | <b>0.434</b> ± 0.135 | 0.052 | <b>0.265</b> ± 0.341 | 0.168 | <b>0.461</b> ± 0.133 | 0.054 | <b>0.908</b> ± 0.306 | 0.740 | AATATATTTTATCATTAAATTTTGAATAAATTCATAAAACAAACTGGAA     |
| chromosome | 568718 | BB_0556 | <b>0.785</b> ± 0.269 | 0.393 | <b>0.695</b> ± 0.234 | 0.097 | <b>0.658</b> ± 0.105 | 0.076 | <b>0.651</b> ± 0.188 | 0.112 | TAAGCACTAAAAACATAAGTTTTTTTTGGTTAAAACATTTTTAAACTGATT   |
| chromosome | 568739 | BB_0556 | <b>1.227</b> ± 1.067 | 0.779 | <b>2.758</b> ± 1.016 | 0.020 | <b>0.448</b> ± 0.316 | 0.272 | <b>0.579</b> ± 0.780 | 0.417 | TATTCAGCTCTATTTAAATTAAGCACTAAAAACATAAGTTTTTTTTGTTT    |
| chromosome | 568772 | BB_0556 | <b>0.969</b> ± 0.299 | 0.764 | <b>1.390</b> ± 1.031 | 0.445 | <b>0.710</b> ± 0.197 | 0.247 | <b>0.819</b> ± 0.365 | 0.027 | AATTTAAATTTCCAATGATGAATTTATGGAACAGAAGCTTTTTATCATAAAA  |
| chromosome | 575962 | IG 58   | <b>0.915</b> ± 0.349 | 0.714 | <b>1.129</b> ± 0.566 | 0.051 | <b>0.693</b> ± 0.269 | 0.254 | <b>0.847</b> ± 0.327 | 0.496 | AAAAGTTTTAAAAAGAACAATTTGTTAAAAATCAAACCGAGCTCCAAAAA    |
| chromosome | 576237 | BB_0563 | <b>1.042</b> ± 1.316 | 0.886 | <b>1.561</b> ± 2.387 | 0.302 | <b>0.797</b> ± 0.927 | 0.785 | <b>1.177</b> ± 1.535 | 0.650 | ATATTTTGGATTTTTCAGTTGGCGCAGGGGATATGGAACAATATGTTTTT    |
| chromosome | 576257 | BB_0563 | <b>1.789</b> ± 1.096 | 0.086 | <b>0.724</b> ± 0.494 | 0.148 | <b>1.368</b> ± 0.725 | 0.260 | <b>1.729</b> ± 1.799 | 0.393 | CACATTTCCGGGAGCTGCTAATATTTTGATTTTTTTCAGTTGGCGCAGGGGG  |
| chromosome | 576318 | BB_0563 | <b>0.959</b> ± 0.691 | 0.908 | <b>1.390</b> ± 1.177 | 0.673 | <b>0.339</b> ± 0.562 | 0.420 | <b>0.607</b> ± 0.490 | 0.399 | TTTACTCCGCTGTAAGACCAATGTCAAGATCAAAATTTTCTATATTAATC    |
| chromosome | 576468 | BB_0563 | <b>0.012</b> ± 0.021 | 0.095 | <b>1.627</b> ± 1.062 | 0.162 | <b>0.443</b> ± 0.608 | 0.402 | <b>0.585</b> ± 0.581 | 0.292 | TTATTTTATAGCCCAATCTCAGGATTTTCTAATTCAAAAGAACTCGCAA     |
| chromosome | 576510 | IG 59   | <b>0.730</b> ± 0.201 | 0.120 | <b>1.260</b> ± 0.399 | 0.295 | <b>0.913</b> ± 0.270 | 0.643 | <b>1.345</b> ± 0.452 | 0.399 | TCTCCTAAGTATAGCAATCTAGCCTTTAAAAGAAATTTAGTCCAATAATTT   |
| chromosome | 576571 | IG 60   | <b>1.582</b> ± 0.590 | 0.223 | <b>1.971</b> ± 1.091 | 0.247 | <b>1.135</b> ± 0.628 | 0.793 | <b>1.389</b> ± 0.524 | 0.080 | AAAAGTAAAAACTATATCTTAAGAGAGCCTTTTATCCCAATAGAAAAGTTA   |
| chromosome | 577481 | BB_0565 | <b>0.886</b> ± 0.467 | 0.793 | <b>1.792</b> ± 1.652 | 0.475 | <b>0.359</b> ± 0.261 | 0.135 | <b>1.387</b> ± 0.726 | 0.399 | TGTTGTTGAGGTTTTAGAATATACTAAGATACAAAAATCCCAAGGACTCC    |
| chromosome | 577911 | BB_0565 | <b>0.964</b> ± 0.129 | 0.471 | <b>1.284</b> ± 0.531 | 0.477 | <b>0.738</b> ± 0.159 | 0.083 | <b>0.965</b> ± 0.325 | 0.864 | TATGATCCTGAATATCAGCAGCAATAGGAGTTTTGATCATGATTTATAGG    |
| chromosome | 577944 | IG 61   | <b>1.254</b> ± 0.368 | 0.311 | <b>0.882</b> ± 0.604 | 0.732 | <b>0.889</b> ± 0.659 | 0.816 | <b>0.549</b> ± 0.467 | 0.289 | AAAACCTCTATTGCTGCTGATATTCAGGATCATATATTGTTGATTTCTAA    |
| chromosome | 578116 | BB_0566 | <b>0.887</b> ± 0.352 | 0.744 | <b>2.590</b> ± 1.964 | 0.235 | <b>0.788</b> ± 0.329 | 0.204 | <b>1.668</b> ± 0.963 | 0.217 | TTAGATGCATACAAAATTTGTATAAAAGTAATATCTATTTTTTCAACATTT   |
| chromosome | 579080 | BB_0567 | <b>0.718</b> ± 0.534 | 0.546 | <b>1.068</b> ± 0.569 | 0.853 | <b>0.618</b> ± 0.418 | 0.128 | <b>0.802</b> ± 0.315 | 0.550 | TTTAGAGGCAATGAAGGTGATAATGTAGAGTCTAAAAATTTTAAATTTGTT   |
| chromosome | 579274 | BB_0567 | <b>0.895</b> ± 0.166 | 0.332 | <b>1.396</b> ± 0.748 | 0.331 | <b>0.718</b> ± 0.136 | 0.112 | <b>0.962</b> ± 0.261 | 0.166 | ATACTAGCAATATAACCTTGCTTCTAGCAGTATCATCTTGAATATTAGAT    |
| chromosome | 579331 | BB_0567 | <b>0.350</b> ± 0.143 | 0.064 | <b>0.529</b> ± 0.183 | 0.140 | <b>0.535</b> ± 0.167 | 0.033 | <b>0.810</b> ± 0.261 | 0.509 | CAATCAACATAAAACTTTCAAAAAGAAAGCTGAAAATAGGAATAGTAATATT  |
| chromosome | 580054 | BB_0567 | <b>0.127</b> ± 0.167 | 0.133 | <b>0.644</b> ± 0.631 | 0.601 | <b>0.459</b> ± 0.320 | 0.285 | <b>0.653</b> ± 0.328 | 0.254 | AAATGCTCATCTTTACTCTAACAGCCAACCTCAATAATAGCCAAAGTC      |
| chromosome | 580495 | BB_0568 | <b>0.969</b> ± 0.664 | 0.941 | <b>1.680</b> ± 2.031 | 0.599 | <b>0.845</b> ± 0.651 | 0.747 | <b>1.008</b> ± 0.653 | 0.986 | TTAGTAATTGATATTCAGGCTTTATAAAGCAGGTTTTTGTAGAGCTTTT     |
| chromosome | 580783 | BB_0568 | <b>0.749</b> ± 0.391 | 0.037 | <b>1.257</b> ± 1.124 | 0.609 | <b>0.566</b> ± 0.296 | 0.025 | <b>0.728</b> ± 0.316 | 0.039 | ATTTAACCTTTTCTTGCTTTGCTCAAGACATCCAAAATTTGGTAACATTT    |
| chromosome | 581300 | BB_0568 | <b>0.767</b> ± 0.660 | 0.513 | <b>1.050</b> ± 0.744 | 0.926 | <b>0.718</b> ± 0.578 | 0.350 | <b>0.929</b> ± 0.817 | 0.917 | GCAATTTACAAAGACCTGGACGAAGAATGTCTCCATCCTCAGCTTCTTTA    |
| chromosome | 581359 | BB_0568 | <b>0.872</b> ± 0.475 | 0.685 | <b>1.318</b> ± 0.571 | 0.468 | <b>1.021</b> ± 0.607 | 0.921 | <b>1.513</b> ± 0.963 | 0.173 | ATAGGTTTACAAAATAATTTCCGCTACTATATTTTACAATCAAATGATAAC   |
| chromosome | 581378 | BB_0568 | <b>0.832</b> ± 0.765 | 0.792 | <b>0.970</b> ± 0.642 | 0.904 | <b>0.605</b> ± 0.687 | 0.183 | <b>0.519</b> ± 0.340 | 0.308 | GTAGACATAAGCCTTCTGTGAATGTACTTTTTAGGCTGCTGCAATGTATG    |
| chromosome | 582416 | BB_0569 | <b>0.692</b> ± 0.281 | 0.212 | <b>1.279</b> ± 0.517 | 0.410 | <b>0.772</b> ± 0.325 | 0.038 | <b>1.059</b> ± 0.455 | 0.863 | AATATTATGTATTCTAATATTGATGTTTTTAAATTTAGAGATATAAGTGAG   |
| chromosome | 583086 | BB_0569 | <b>0.789</b> ± 0.869 | 0.229 | <b>1.798</b> ± 1.731 | 0.379 | <b>0.627</b> ± 0.604 | 0.620 | <b>0.508</b> ± 0.589 | 0.108 | TTGATAATATTTTGTCTTATGAAGTTTTTTCAATTGAATTTATGGAAATAT   |
| chromosome | 583193 | BB_0569 | <b>0.743</b> ± 0.320 | 0.398 | <b>0.996</b> ± 0.927 | 0.993 | <b>0.671</b> ± 0.468 | 0.150 | <b>1.167</b> ± 0.589 | 0.638 | GATATAGATAACTTTTTAAGCAATATGGAAAGCAAATAAATTTCAATCTT    |
| chromosome | 583308 | BB_0569 | <b>1.235</b> ± 0.992 | 0.010 | <b>1.730</b> ± 1.952 | 0.372 | <b>1.148</b> ± 1.194 | 0.533 | <b>0.819</b> ± 0.573 | 0.712 | GAATTGCTAATCGATTTACTTTATTTGTTTATAAAAAACACTTATTATCTT   |
| chromosome | 583406 | BB_0569 | <b>1.000</b> ± 0.758 | 1.000 | <b>2.044</b> ± 1.944 | 0.357 | <b>0.995</b> ± 0.690 | 0.990 | <b>1.255</b> ± 0.602 | 0.590 | ATTTTGTTTTAAATTTTATATACTTTTTAGGAGGGTTTTAGGAGAAAAATTA  |
| chromosome | 583497 | BB_0570 | <b>0.853</b> ± 0.533 | 0.702 | <b>1.187</b> ± 0.989 | 0.793 | <b>0.494</b> ± 0.320 | 0.347 | <b>0.847</b> ± 0.499 | 0.646 | TTGCCCTATTGTCAATCAACAAAATCTTTTTTTCATCTAATTTTCTC       |
| chromosome | 583575 | BB_0570 | <b>1.084</b> ± 0.785 | 0.877 | <b>1.059</b> ± 0.478 | 0.890 | <b>0.573</b> ± 0.434 | 0.377 | <b>0.854</b> ± 0.316 | 0.466 | AAACCCCTCTAAACCCTTTTGTCTTCTAGAGACTCCAAAACGGTTTTGTT    |
| chromosome | 583677 | BB_0570 | <b>1.140</b> ± 0.503 | 0.510 | <b>1.708</b> ± 0.743 | 0.151 | <b>1.051</b> ± 0.486 | 0.729 | <b>1.404</b> ± 0.604 | 0.040 | TCTGCTTAATAACCCCAATGCCGCTAAATTAGGCATGTTGATATCTGTAA    |
| chromosome | 589848 | BB_0576 | <b>1.328</b> ± 1.017 | 0.671 | <b>3.086</b> ± 2.384 | 0.279 | <b>1.125</b> ± 0.588 | 0.769 | <b>1.614</b> ± 0.901 | 0.345 | TATCGTTTACTTTGGGTAAGCTAAGGCAAGCCAAGTTATGCTAGATA       |
| chromosome | 589892 | BB_0576 | <b>1.447</b> ± 0.958 | 0.524 | <b>1.202</b> ± 0.598 | 0.432 | <b>0.790</b> ± 0.320 | 0.228 | <b>1.033</b> ± 0.584 | 0.932 | GCATAACTGGCTTGCCCTTAGCTTACCCAAAGTAATAACGATATAATCT     |
| chromosome | 589958 | BB_0576 | <b>0.412</b> ± 0.325 | 0.082 | <b>0.421</b> ± 0.383 | 0.333 | <b>0.191</b> ± 0.228 | 0.048 | <b>0.685</b> ± 0.782 | 0.336 | GTAAGAGTTATTAGATTGTTGAATAAATGATAAGAGCATTTATAAAAAA     |
| chromosome | 590202 | BB_0576 | <b>0.910</b> ± 0.433 | 0.508 | <b>1.293</b> ± 1.061 | 0.445 | <b>0.828</b> ± 0.503 | 0.348 | <b>1.001</b> ± 0.485 | 0.994 | ATCAAAATTCATGTTCTCAAATATTAATTTAATTAATAGTCAGCATGACT    |
| chromosome | 590247 | IG 62   | <b>0.560</b> ± 0.278 | 0.123 | <b>0.281</b> ± 0.255 | 0.133 | <b>0.933</b> ± 0.393 | 0.813 | <b>0.732</b> ± 0.374 | 0.109 | ATTATAATTAATCATTGCCGAAAATGAAAGGGAAAATTATGTTAATCAAA    |
| chromosome | 590480 | BB_0577 | <b>0.861</b> ± 0.270 | 0.034 | <b>1.436</b> ± 1.079 | 0.473 | <b>0.936</b> ± 0.258 | 0.744 | <b>0.930</b> ± 0.223 | 0.414 | CTTCTCAATCTTTTAGGAAAATTCGAAATCTTCTTTTAAATAGCAATAT     |
| chromosome | 590768 | BB_0577 | <b>0.670</b> ± 0.267 | 0.135 | <b>1.449</b> ± 1.129 | 0.432 | <b>0.500</b> ± 0.209 | 0.087 | <b>0.791</b> ± 0.394 | 0.520 | CTGTAATAATTTATCATCTTGCTTGAGGATAACTTTTTGGTTGCCAAA      |
| chromosome | 590975 | IG 63   | <b>1.026</b> ± 0.779 | 0.924 | <b>0.886</b> ± 0.350 | 0.739 | <b>0.674</b> ± 0.326 | 0.078 | <b>0.819</b> ± 0.419 | 0.615 | ATTTAATTTAATTTAAATTTAAAACACTAATTTAAATTTAAATTTACTTTCTT |



|            |        |         |             |                            |                            |                            |                            |                                                        |
|------------|--------|---------|-------------|----------------------------|----------------------------|----------------------------|----------------------------|--------------------------------------------------------|
| chromosome | 657295 | BB_0626 | <i>rrmV</i> | <b>0.571</b> ± 0.467 0.408 | <b>0.995</b> ± 1.527 0.992 | <b>0.513</b> ± 0.688 0.119 | <b>0.696</b> ± 0.751 0.452 | TCTTAATACTAAAGACACTGAGGTTGAATCAGTAAATAAACAGAAAATAAT    |
| chromosome | 659699 | BB_0629 |             | <b>1.335</b> ± 0.839 0.022 | <b>1.998</b> ± 1.432 0.168 | <b>0.742</b> ± 0.401 0.563 | <b>1.185</b> ± 0.952 0.738 | TAACAGCTGTTTTAATAGGAATCCTTAAAAAAGAAATACAAGAATATAAACCG  |
| chromosome | 659840 | BB_0629 |             | <b>0.836</b> ± 0.586 0.677 | <b>0.061</b> ± 0.106 0.007 | <b>0.025</b> ± 0.044 0.009 | <b>0.159</b> ± 0.276 0.020 | CATGCGGGTATTACCCTTAAAGGATCTGCTGCTGCAAAATGGAATTACTCC    |
| chromosome | 660191 | BB_0629 |             | <b>0.862</b> ± 0.198 0.369 | <b>1.285</b> ± 0.723 0.584 | <b>0.602</b> ± 0.145 0.079 | <b>0.851</b> ± 0.083 0.160 | ATGAATCAATAACAAAATATGCTTAAATCAACTTAGCCGCTACTAATATGCTAA |
| chromosome | 661151 | BB_0629 |             | <b>1.190</b> ± 1.142 0.826 | <b>1.090</b> ± 1.294 0.926 | <b>0.691</b> ± 0.690 0.596 | <b>1.667</b> ± 1.421 0.504 | ATACTTTTAGCAACAACCTATTAAGACATGAACCTATGAGCACAAAATAATG   |
| chromosome | 661332 | BB_0629 |             | <b>0.970</b> ± 1.046 0.926 | <b>1.463</b> ± 1.385 0.014 | <b>0.438</b> ± 0.432 0.217 | <b>0.726</b> ± 0.702 0.672 | GCTATGCCTCATGCAAAAGGCAATTCATTAATAAACACGGAATTGCTATT     |
| chromosome | 661527 | IG 73   |             | <b>0.797</b> ± 0.770 0.653 | <b>1.596</b> ± 1.505 0.471 | <b>0.345</b> ± 0.300 0.222 | <b>0.258</b> ± 0.256 0.262 | AAGGTGATTATTATGCAAAATTTATTTTCAAAAACTTGATTGTTTTAAAT     |
| chromosome | 661543 | IG 74   |             | <b>1.370</b> ± 0.719 0.494 | <b>1.788</b> ± 1.324 0.245 | <b>1.282</b> ± 0.748 0.253 | <b>1.605</b> ± 1.406 0.353 | CACATATAATATATAAAGGTGATTATTATGCAAAATTTATTTTCAAAAA      |
| chromosome | 662588 | IG 75   |             | <b>1.026</b> ± 0.134 0.586 | <b>1.133</b> ± 0.261 0.358 | <b>0.897</b> ± 0.136 0.420 | <b>0.925</b> ± 0.248 0.537 | CAGTATTTAGTTTGCTTAAATTTTTTAAATTTTGATTATATAATTTCTTTTT   |
| chromosome | 662622 | BB_0631 |             | <b>1.278</b> ± 1.265 0.721 | <b>0.691</b> ± 0.515 0.339 | <b>0.712</b> ± 0.728 0.013 | <b>1.302</b> ± 0.909 0.313 | AATCAAAATTAATAATTAAGCAAATAAACTGTAGCTTTTAAAGCTA         |
| chromosome | 675102 | BB_0637 |             | <b>0.961</b> ± 0.143 0.720 | <b>1.863</b> ± 0.817 0.227 | <b>0.762</b> ± 0.460 0.458 | <b>0.913</b> ± 0.465 0.802 | TTATCTATTTAGGCACGGGGATTTATTTGGGAGTATTGGTGTAGAAATGG     |
| chromosome | 676104 | BB_0637 |             | <b>1.287</b> ± 0.904 0.507 | <b>0.716</b> ± 0.700 0.452 | <b>0.486</b> ± 0.295 0.055 | <b>1.136</b> ± 0.843 0.757 | AGTAAAGCAATTGTGTTATTAGCAAGAAAAACCACTAATTTGAAACAAAA     |
| chromosome | 676107 | BB_0637 |             | <b>1.085</b> ± 0.442 0.040 | <b>2.339</b> ± 2.474 0.376 | <b>0.904</b> ± 0.322 0.658 | <b>1.067</b> ± 0.337 0.779 | TTTGCAGCAAAGTAGCAAAAAAGATAGCTTTTGAATAAACATCAGTGTTTC    |
| chromosome | 676847 | BB_0638 |             | <b>0.584</b> ± 0.353 0.056 | <b>0.630</b> ± 0.514 0.069 | <b>0.638</b> ± 0.279 0.045 | <b>0.637</b> ± 0.220 0.150 | CTATTAATCAATGGAACATATTTAAGACCAATATTTACTACAGCATCAA      |
| chromosome | 677556 | BB_0638 |             | <b>0.917</b> ± 0.206 0.567 | <b>1.630</b> ± 0.741 0.315 | <b>0.896</b> ± 0.254 0.005 | <b>0.951</b> ± 0.198 0.465 | TTTTAATGAGTGGTCTGTGTAAGATCAATAACTAAGGAAAAATAATTTAA     |
| chromosome | 677783 | BB_0638 |             | <b>0.955</b> ± 0.866 0.952 | <b>1.521</b> ± 1.565 0.477 | <b>0.625</b> ± 0.674 0.275 | <b>1.142</b> ± 0.966 0.801 | TAGACAAAGCAATCAATAAGATCAAAAACTTGATAAATTAATAATGGAA      |
| chromosome | 684881 | BB_0645 |             | <b>0.242</b> ± 0.245 0.145 | <b>0.158</b> ± 0.114 0.129 | <b>0.888</b> ± 0.998 0.550 | <b>0.399</b> ± 0.528 0.369 | ATTAATTAAGGCAATGGGGTTCAGGTAGTTTACGGACCAGGTGTTAGTGT     |
| chromosome | 684980 | IG 76   |             | <b>0.590</b> ± 0.352 0.321 | <b>0.735</b> ± 0.624 0.631 | <b>0.451</b> ± 0.337 0.098 | <b>0.396</b> ± 0.300 0.053 | CCTATTAATAAAAAATCAAGCCTCAGCAATCTTCTTATTTCAATTTAAAGAA   |
| chromosome | 684983 | IG 77   |             | <b>0.925</b> ± 0.537 0.691 | <b>1.128</b> ± 0.606 0.791 | <b>0.699</b> ± 0.507 0.200 | <b>1.351</b> ± 0.745 0.361 | TTACTTATTAATAAAAAATCAAGCCTCAGCAATCTTCTTATTTCAATTTAA    |
| chromosome | 688393 | IG 78   |             | <b>0.972</b> ± 0.333 0.709 | <b>2.305</b> ± 1.093 0.197 | <b>1.292</b> ± 1.153 0.649 | <b>0.761</b> ± 0.232 0.045 | GAAGTAATACGCTACTATAGCGAATGTATTAAAGTTATGTAAATCTTATAT    |
| chromosome | 695782 | BB_0656 |             | <b>0.000</b> ± 0.000 0.150 | <b>0.000</b> ± 0.000 0.150 | <b>1.351</b> ± 2.556 0.840 | <b>0.439</b> ± 0.508 0.474 | ATGTAAGTGTTTTTATAATTTGGATGACCCAGCAAGATTAATGACATTTT     |
| chromosome | 696474 | BB_0656 |             | <b>0.817</b> ± 1.109 0.303 | <b>1.317</b> ± 1.242 0.518 | <b>0.624</b> ± 0.509 0.477 | <b>1.005</b> ± 0.959 0.993 | GTAACGTTTGAATTGTTAGAGGATTTGGAGTTTTTTGTTTATCATTTTTATT   |
| chromosome | 704543 | BB_0666 |             | <b>1.029</b> ± 0.895 0.911 | <b>1.567</b> ± 1.213 0.440 | <b>0.630</b> ± 0.499 0.525 | <b>0.601</b> ± 0.486 0.476 | TAGATAAAAAATATAACATTATTGGGGAAATTTGGCTTTATGCATTTGCAA    |
| chromosome | 710277 | BB_0670 |             | <b>1.764</b> ± 1.009 0.248 | <b>2.373</b> ± 1.295 0.070 | <b>0.788</b> ± 0.684 0.310 | <b>1.667</b> ± 1.799 0.487 | AGTTGACGGCCATTGATAATGATTTATCAAAGTGTGTAACCTCTAGGT       |
| chromosome | 710423 | BB_0670 |             | <b>0.303</b> ± 0.444 0.230 | <b>0.658</b> ± 0.761 0.682 | <b>0.116</b> ± 0.154 0.239 | <b>0.528</b> ± 0.705 0.332 | GGATTTCTGACTTAAATTTATAAECTCCGGGACTTTGTTCAAAAGAATTCC    |
| chromosome | 710857 | BB_0671 |             | <b>0.347</b> ± 0.337 0.167 | <b>0.501</b> ± 0.242 0.112 | <b>0.624</b> ± 0.330 0.186 | <b>0.718</b> ± 0.353 0.430 | ATTAATGATATGGACATAGAAACAGCTCTTTTTGTTGCTTCAATTAATAA     |
| chromosome | 710872 | BB_0671 |             | <b>0.975</b> ± 0.896 0.874 | <b>1.741</b> ± 1.732 0.263 | <b>0.890</b> ± 0.647 0.536 | <b>0.979</b> ± 0.931 0.881 | TGTCATATCAATAAATTACTGCCCTCAACAGACCCAGCAAGCCCTACTA      |
| chromosome | 711002 | BB_0671 |             | <b>0.220</b> ± 0.239 0.068 | <b>1.203</b> ± 0.659 0.709 | <b>0.567</b> ± 0.534 0.372 | <b>0.469</b> ± 0.161 0.087 | ACAAAATTTCCAGCAATAATTTGCCAACCTCAGTTAGAGTTGCAGCAACC     |
| chromosome | 711079 | BB_0671 |             | <b>1.005</b> ± 0.737 0.978 | <b>0.734</b> ± 0.452 0.579 | <b>0.581</b> ± 0.319 0.204 | <b>0.795</b> ± 0.418 0.602 | AGTAATAAAGGTTCTGAGGCTTTAATTGTTCTTTTTCTTGGCTGATGTT      |
| chromosome | 713133 | BB_0674 |             | <b>0.840</b> ± 0.412 0.530 | <b>1.307</b> ± 0.583 0.477 | <b>0.483</b> ± 0.208 0.071 | <b>0.858</b> ± 0.249 0.206 | TTAGTGCAATCGTATTTTGTATGGTAAAAAAGAATTATTGAGAGTCTCT      |
| chromosome | 713908 | BB_0675 |             | <b>0.971</b> ± 1.096 0.948 | <b>3.902</b> ± 7.076 0.398 | <b>1.012</b> ± 1.204 0.970 | <b>1.354</b> ± 1.766 0.009 | TCTGTTTTATCCTTGACGTATTGAATTAGGTCTTTTATTTCTGATTTCAAAA   |
| chromosome | 713936 | BB_0675 |             | <b>0.774</b> ± 0.382 0.386 | <b>1.656</b> ± 1.783 0.588 | <b>0.565</b> ± 0.272 0.126 | <b>0.954</b> ± 0.522 0.888 | GGTCTTTTATTTCTGATTCAAAATCATTTTTGATAAATGTAGCAATTGTTT    |
| chromosome | 718797 | IG 79   |             | <b>0.605</b> ± 0.309 0.265 | <b>0.920</b> ± 0.613 0.610 | <b>0.800</b> ± 0.606 0.305 | <b>0.602</b> ± 0.211 0.147 | TTTAATCAATAAACTCAAGACCAAAGGGTATCAAAAAAATTTACAGCA       |
| chromosome | 718825 | IG 80   |             | <b>0.577</b> ± 0.639 0.470 | <b>0.804</b> ± 1.068 0.455 | <b>0.422</b> ± 0.470 0.464 | <b>0.872</b> ± 1.188 0.561 | ATAAACTACCTCACAAATCACCTACTTTTAAATCAAATAAACTCAAGACC     |
| chromosome | 718943 | BB_0680 |             | <b>0.338</b> ± 0.388 0.278 | <b>0.871</b> ± 1.403 0.845 | <b>0.327</b> ± 0.538 0.036 | <b>0.402</b> ± 0.700 0.101 | TTATAAGCAGCTTACAAGGGCGCAAGTAAAGAAGAGCAGCTTTTTCTTTGCA   |
| chromosome | 719180 | BB_0680 |             | <b>1.030</b> ± 0.372 0.905 | <b>1.538</b> ± 0.505 0.180 | <b>0.795</b> ± 0.064 0.013 | <b>0.688</b> ± 0.148 0.093 | TGTCGATATTTTTGCTCACCTTTACAGATGCAATAACAATTTTGATTT       |
| chromosome | 719551 | BB_0680 |             | <b>1.009</b> ± 0.940 0.970 | <b>1.325</b> ± 1.438 0.250 | <b>0.641</b> ± 0.591 0.331 | <b>0.983</b> ± 1.083 0.855 | AATCTATCAAACTATCTGCCACAATATCATTAAAGCAATATCCGGCCAAA     |
| chromosome | 719748 | BB_0680 |             | <b>1.000</b> ± 0.917 0.997 | <b>1.943</b> ± 2.328 0.338 | <b>0.583</b> ± 0.430 0.264 | <b>0.851</b> ± 0.631 0.609 | CTTTTGTCCGAAATGGGAGAAGATTGTTATTTATGCAATGTTGCCATAAGT    |
| chromosome | 719919 | BB_0680 |             | <b>0.513</b> ± 0.448 0.447 | <b>0.186</b> ± 0.358 0.113 | <b>0.377</b> ± 0.342 0.357 | <b>0.159</b> ± 0.237 0.156 | ATGCTATAATGCCTAAGACTGAATATAAAATATACTGAAATCTTAGACTAG    |
| chromosome | 720015 | BB_0680 |             | <b>0.962</b> ± 0.763 0.771 | <b>1.631</b> ± 1.587 0.375 | <b>0.711</b> ± 0.467 0.042 | <b>0.914</b> ± 0.545 0.228 | GATAAAGATTATGCTCTTGATGATGATAAATACTCTTGGAACCTTGGC       |
| chromosome | 720235 | BB_0680 |             | <b>0.897</b> ± 0.503 0.773 | <b>0.966</b> ± 0.338 0.846 | <b>0.828</b> ± 0.146 0.295 | <b>0.926</b> ± 0.193 0.553 | GCTGACATTTCTTCAAGAGCAGATGCCTGTTGCAATGCCTAGAGCTTAAA     |
| chromosome | 720330 | BB_0680 |             | <b>1.867</b> ± 1.430 0.263 | <b>1.277</b> ± 0.951 0.551 | <b>2.301</b> ± 3.714 0.524 | <b>1.119</b> ± 1.271 0.588 | TCTGAGAATTTTCATTCGCTTTAAAGCTATTTGTTCTGTTTCATAAGAAT     |
| chromosome | 720364 | BB_0680 |             | <b>0.813</b> ± 0.816 0.781 | <b>1.264</b> ± 1.529 0.610 | <b>0.823</b> ± 1.119 0.877 | <b>1.289</b> ± 1.271 0.716 | GCAATAACAGATTTCTCAACGGCCCTACCACCTATCTGAGAATTTTCATTC    |
| chromosome | 720760 | BB_0680 |             | <b>1.397</b> ± 1.061 0.634 | <b>1.946</b> ± 1.634 0.329 | <b>1.019</b> ± 0.451 0.694 | <b>0.755</b> ± 0.706 0.395 | CTAGAAAGCTGCTCACTGCTTGAAGCTGAAGATTGAACAACCTCTCCAACC    |
| chromosome | 721174 | BB_0681 |             | <b>0.675</b> ± 0.203 0.002 | <b>0.591</b> ± 0.436 0.347 | <b>0.719</b> ± 0.207 0.043 | <b>1.031</b> ± 0.336 0.751 | TATCAATTTTGTGTTTTGCTTTTGAAGTCTTATTAATAGTAAATTTGGTGG    |
| chromosome | 721662 | BB_0681 |             | <b>0.357</b> ± 0.362 0.074 | <b>1.526</b> ± 1.882 0.680 | <b>0.080</b> ± 0.144 0.096 | <b>1.016</b> ± 1.006 0.985 | TTAATATGTAAGGAATCTGACCTTTTTTATTTTTATCTTGGAAATATCTT     |
| chromosome | 721740 | BB_0681 |             | <b>0.831</b> ± 0.260 0.500 | <b>1.143</b> ± 1.083 0.813 | <b>1.073</b> ± 0.325 0.468 | <b>0.761</b> ± 0.446 0.508 | TATAGGCTTTTTAGAGGGATTAATTTTGAATACTCTAGCGGTCGTGCGG      |
| chromosome | 721742 | BB_0681 |             | <b>1.169</b> ± 0.720 0.158 | <b>0.878</b> ± 0.413 0.699 | <b>0.458</b> ± 0.241 0.206 | <b>0.976</b> ± 0.598 0.927 | TAGGCTTTTTAGAGGGATTAATTTTGAATACTCTAGCGGTCGTGCGCT       |
| chromosome | 722079 | BB_0681 |             | <b>0.740</b> ± 0.379 0.299 | <b>1.371</b> ± 1.264 0.569 | <b>0.477</b> ± 0.477 0.138 | <b>1.122</b> ± 0.439 0.358 | ATCTTAGCAATTAGTTTTGTATTTACATTACTTATGCTTGCTATTGCAACT    |



|            |        |          |             |                            |                            |                            |                            |                                                      |
|------------|--------|----------|-------------|----------------------------|----------------------------|----------------------------|----------------------------|------------------------------------------------------|
| chromosome | 840000 | BB_0797  | <i>mutS</i> | <b>1.059</b> ± 0.369 0.309 | <b>1.427</b> ± 0.983 0.364 | <b>0.825</b> ± 0.396 0.092 | <b>1.028</b> ± 0.326 0.707 | GATATCAATAATGATTCTTCGTACATGTTTCTTGATGACGTAACCTCAAGTT |
| chromosome | 840049 | BB_0797  | <i>mutS</i> | <b>2.136</b> ± 1.379 0.320 | <b>0.763</b> ± 1.113 0.787 | <b>2.008</b> ± 3.451 0.680 | <b>0.999</b> ± 1.594 0.999 | ACTTGAGTTACGTCATCAAGAAACATGTACGGAAGAACATTATTGATATCT  |
| chromosome | 840052 | BB_0797  | <i>mutS</i> | <b>0.689</b> ± 0.340 0.278 | <b>0.587</b> ± 0.447 0.466 | <b>0.781</b> ± 0.561 0.107 | <b>1.211</b> ± 1.084 0.586 | ATCTTGAACCTTGTAATAAATAATGATTTTTTCTCTCAATATTCATTAT    |
| chromosome | 840598 | BB_0797  | <i>mutS</i> | <b>0.936</b> ± 0.893 0.939 | <b>0.298</b> ± 0.488 0.405 | <b>0.859</b> ± 0.857 0.772 | <b>0.612</b> ± 1.043 0.726 | ATCTTGCTAAGCAATCTCTCTGATTCAGATATCAAGATATATTTTTT      |
| chromosome | 840847 | BB_0797  | <i>mutS</i> | <b>1.105</b> ± 0.962 0.826 | <b>2.150</b> ± 2.443 0.127 | <b>0.959</b> ± 0.846 0.952 | <b>0.724</b> ± 0.950 0.750 | AAAAGGTTGCAGAATTTTTGCATATATTGATTAGTTGTTAACTTTGGTT    |
| chromosome | 841046 | BB_0797  | <i>mutS</i> | <b>1.308</b> ± 0.793 0.290 | <b>3.188</b> ± 3.501 0.341 | <b>0.938</b> ± 0.458 0.838 | <b>1.291</b> ± 0.794 0.344 | CTTTTCTTTAATTCTTACAAAATTTTCAGTAAAGATTTTCAGTATTTTT    |
| chromosome | 841131 | BB_0797  | <i>mutS</i> | <b>0.525</b> ± 0.427 0.182 | <b>0.277</b> ± 0.099 0.005 | <b>0.409</b> ± 0.549 0.196 | <b>0.148</b> ± 0.217 0.019 | TATGCGCCATTAAAGTAATTAAGCCACCTGACGCAAAATAGGTTGATTTAC  |
| chromosome | 841588 | BB_0797  | <i>mutS</i> | <b>1.094</b> ± 0.536 0.290 | <b>1.316</b> ± 0.650 0.517 | <b>0.484</b> ± 0.165 0.092 | <b>0.954</b> ± 0.641 0.763 | ATGTTATTCTAGAAGTTTGGTGGCCGAGAGGGCAACTCTGTTTAGAGT     |
| chromosome | 847871 | BB_0803  | <i>truB</i> | <b>1.129</b> ± 0.578 0.741 | <b>0.856</b> ± 0.497 0.766 | <b>0.631</b> ± 0.395 0.472 | <b>1.047</b> ± 0.663 0.909 | GGCTCTGCTGCCATCAATGAACAGAAAGAAATCTAGGAGGACTTTGATA    |
| chromosome | 848239 | BB_0803  | <i>truB</i> | <b>0.420</b> ± 0.272 0.030 | <b>0.447</b> ± 0.350 0.074 | <b>0.692</b> ± 0.154 0.152 | <b>0.939</b> ± 0.322 0.753 | TTGATTTCAATTTCAAATAAACACCATTTTTAAACAAGATTTATCTTATTA  |
| chromosome | 848320 | BB_0803  | <i>truB</i> | <b>1.015</b> ± 0.399 0.956 | <b>1.071</b> ± 0.956 0.908 | <b>1.206</b> ± 0.488 0.491 | <b>1.827</b> ± 0.748 0.229 | AATATGTCATTATATTTAATTATAAATATATTATGACATTTAATTTTTAT   |
| chromosome | 858686 | BB_0811  |             | <b>1.792</b> ± 1.000 0.137 | <b>1.995</b> ± 1.189 0.213 | <b>0.804</b> ± 0.776 0.538 | <b>1.132</b> ± 0.855 0.683 | TTAATAGACCCTCAAATGTTTTAAGGGGCGTTGCTTCAATGTTGGCTGGTA  |
| chromosome | 861758 | BB_0814  | <i>panF</i> | <b>1.446</b> ± 0.842 0.040 | <b>1.711</b> ± 1.195 0.383 | <b>1.159</b> ± 0.708 0.120 | <b>1.058</b> ± 0.767 0.554 | TTTTTTTTACAAAAAAATAAECTACTAAAAATGAAATATAGAAAAACAAA   |
| chromosome | 861841 | BB_0815  |             | <b>1.463</b> ± 1.320 0.670 | <b>3.651</b> ± 6.234 0.550 | <b>0.165</b> ± 0.275 0.104 | <b>1.080</b> ± 1.477 0.946 | GTCGCTTGCCATTATCATTAGCAAGCACTCTAAAAAATATATTTATCCA    |
| chromosome | 862301 | BB_0815  |             | <b>0.956</b> ± 0.344 0.841 | <b>1.405</b> ± 1.071 0.477 | <b>0.934</b> ± 0.328 0.820 | <b>1.128</b> ± 0.544 0.669 | GATCCACCATAAATGCCTCACCTTAGCTTTCTTGCAAGTATTATATTTTTT  |
| chromosome | 862513 | BB_0815  |             | <b>1.217</b> ± 0.575 0.220 | <b>1.811</b> ± 1.209 0.211 | <b>1.084</b> ± 0.553 0.781 | <b>0.789</b> ± 0.546 0.560 | TTTGATGGGTAAGCCTGTTTCAATAACAATCTCGACAAGAGTAGCTCTTT   |
| chromosome | 867777 | BB_0823  |             | <b>0.819</b> ± 1.056 0.581 | <b>1.489</b> ± 1.260 0.620 | <b>0.792</b> ± 0.531 0.595 | <b>1.051</b> ± 1.297 0.940 | TAGTCAACAATTAATAATTGATCATTCTAAATAGCTTTACTACATAACCG   |
| chromosome | 868626 | BB_0824  |             | <b>0.959</b> ± 0.649 0.857 | <b>0.927</b> ± 0.517 0.848 | <b>0.846</b> ± 0.571 0.409 | <b>0.542</b> ± 0.344 0.062 | TATTAGGCCTTTGTTTATGCTTTCTCAATTTCTCAATTAATAAAAA       |
| chromosome | 868703 | BB_0824  |             | <b>0.298</b> ± 0.501 0.076 | <b>0.348</b> ± 0.586 0.254 | <b>0.557</b> ± 0.315 0.206 | <b>0.231</b> ± 0.344 0.021 | TGCTTGGATTTAATATCGGTTGGAGATTTTTCAATTAGGAAGTTTTATTCC  |
| chromosome | 869189 | BB_0825  |             | <b>0.493</b> ± 0.569 0.359 | <b>0.953</b> ± 1.174 0.882 | <b>0.357</b> ± 0.498 0.449 | <b>0.377</b> ± 0.553 0.213 | TAATAAAAAAATGATTTCAAAACAAATAAATACTACGGAGAGATTGTAAT   |
| chromosome | 869195 | BB_0825  |             | <b>1.174</b> ± 1.619 0.878 | <b>1.498</b> ± 2.309 0.770 | <b>0.056</b> ± 0.105 0.127 | <b>1.900</b> ± 2.341 0.330 | CATATATAATAAAAAAATGATTTCAAAACAAATAAATACTACGGAGAGAT   |
| chromosome | 869564 | BB_0826  |             | <b>1.235</b> ± 1.039 0.464 | <b>1.538</b> ± 1.749 0.648 | <b>0.754</b> ± 0.742 0.709 | <b>1.505</b> ± 1.488 0.625 | ATACTAACAAACTATCCCAAAAGCATTMTTCTTATAAAAAAAGAAAT      |
| chromosome | 870075 | IG 91    |             | <b>1.046</b> ± 0.288 0.644 | <b>1.546</b> ± 0.679 0.220 | <b>0.726</b> ± 0.411 0.380 | <b>1.141</b> ± 0.437 0.608 | TATTTTATATTATAACAAGGCTTCAAAGTTTGTATTTTTAAAAAAGTAAT   |
| chromosome | 870079 | IG 92    |             | <b>0.600</b> ± 0.670 0.552 | <b>0.835</b> ± 0.672 0.724 | <b>0.305</b> ± 0.152 0.100 | <b>0.059</b> ± 0.047 0.055 | AAATATAATAATCAAATATTATTCAAAGTTAACAGCAATGAAGTTTATAAT  |
| chromosome | 875775 | BB_0829  |             | <b>0.549</b> ± 0.116 0.063 | <b>0.747</b> ± 0.570 0.570 | <b>0.775</b> ± 0.084 0.058 | <b>1.074</b> ± 0.316 0.594 | AGATATTAATGGCGCATTCTTTTTTGGCAGCAGTAAAAAGATTGACACCT   |
| chromosome | 876183 | BB_0829  |             | <b>0.933</b> ± 0.571 0.890 | <b>2.416</b> ± 2.200 0.389 | <b>0.173</b> ± 0.183 0.099 | <b>1.022</b> ± 1.564 0.968 | TTTTGATTTAGCAAGGCTTAATTTTGAATTTAGTTCTTATTTCTCAT      |
| chromosome | 876441 | BB_0829  |             | <b>0.883</b> ± 0.770 0.071 | <b>1.092</b> ± 0.986 0.393 | <b>0.596</b> ± 0.485 0.145 | <b>0.847</b> ± 0.576 0.523 | TCCTCATTTACCCCAATATCCGTTAGCTAAAACCTTTTAAAAAAGAGAA    |
| chromosome | 876672 | BB_0830  |             | <b>1.103</b> ± 1.357 0.868 | <b>1.843</b> ± 2.515 0.649 | <b>0.748</b> ± 0.850 0.786 | <b>1.675</b> ± 1.565 0.524 | ATTTAACATAAGCGCTAGTCTCGCCTTTTGATATAAATCTACAATTTTTT   |
| chromosome | 876817 | BB_0830  |             | <b>0.695</b> ± 0.521 0.237 | <b>1.100</b> ± 1.100 0.654 | <b>0.485</b> ± 0.351 0.156 | <b>0.758</b> ± 0.763 0.071 | AAAGTCTTTGTCGATTAGACTTTAACCAATTTTGTCAAACCTGTAATTTTAC |
| chromosome | 879352 | BB_0831  |             | <b>0.502</b> ± 0.618 0.347 | <b>1.396</b> ± 1.615 0.664 | <b>1.818</b> ± 1.577 0.358 | <b>2.117</b> ± 2.137 0.399 | GTACCAAATATTCGCTTTCAGATTCAAGCGGTGTTTTTTTGATAAAAAATG  |
| chromosome | 879784 | BB_0831  |             | <b>0.644</b> ± 0.526 0.486 | <b>1.014</b> ± 0.442 0.971 | <b>1.039</b> ± 0.343 0.141 | <b>1.311</b> ± 0.529 0.148 | AATCCAACCTCTCCGGACATAAAAAGATTTTCTCTAAAAGCTTGCCATTT   |
| chromosome | 880234 | BB_0831  |             | <b>0.740</b> ± 0.330 0.329 | <b>0.635</b> ± 0.293 0.338 | <b>0.605</b> ± 0.306 0.079 | <b>0.917</b> ± 0.363 0.619 | TTTTGATTTTTGCAAGTAAAATAATGAACAAAGCTCCAATTTTACCAGAT   |
| chromosome | 888240 | IG 93    |             | <b>0.281</b> ± 0.049 0.010 | <b>0.802</b> ± 0.203 0.127 | <b>0.529</b> ± 0.094 0.000 | <b>0.751</b> ± 0.430 0.374 | ATTCATTATAAATCAATATAATTTAATTAATCTTTGTTTAAATAAAAAA    |
| chromosome | 896550 | BB_0838  |             | <b>1.037</b> ± 0.544 0.851 | <b>1.899</b> ± 1.544 0.252 | <b>0.870</b> ± 0.491 0.405 | <b>1.417</b> ± 0.881 0.484 | ATAGAAAAACAAAAAATAAATGATTTTTCATTATTAGTAATATAAAT      |
| chromosome | 903759 | IG 94    |             | <b>1.072</b> ± 0.857 0.285 | <b>2.026</b> ± 2.004 0.257 | <b>0.573</b> ± 0.330 0.241 | <b>0.869</b> ± 0.601 0.373 | AAAGAAATTTTCAATTTTTAAAAAATTTATAGATAAACATAATCTAAAAC   |
| chromosome | 904267 | BB_0844  |             | <b>1.041</b> ± 0.715 0.930 | <b>1.340</b> ± 1.277 0.630 | <b>1.177</b> ± 1.611 0.871 | <b>0.833</b> ± 0.978 0.834 | AATAGTGGACTTAGCGAGAGAGCATCTGCAAAATACCTTTTGGAGAAAGCC  |
| chromosome | 904270 | BB_0844  |             | <b>1.371</b> ± 1.643 0.461 | <b>1.897</b> ± 1.914 0.175 | <b>1.344</b> ± 1.320 0.131 | <b>1.972</b> ± 1.733 0.195 | ATTGAGTATGAAGATTTTCAATATCGCCTCTTTTTTCTAATAACTGATTGA  |
| chromosome | 904861 | BB_0844  |             | <b>0.727</b> ± 0.878 0.727 | <b>0.421</b> ± 0.532 0.527 | <b>0.547</b> ± 0.620 0.521 | <b>0.635</b> ± 0.919 0.649 | TTAGCATTATCATGTAATTTGATAAATTTTTTTTTTTCATATTTTCTCTCC  |
| chromosome | 905027 | BB_0845a |             | <b>1.179</b> ± 0.833 0.246 | <b>1.698</b> ± 1.580 0.325 | <b>0.834</b> ± 0.458 0.325 | <b>1.079</b> ± 0.640 0.375 | CATAGTCAAAAAATAAAAAATTAACCAAAAAATTAACGATATGGAAAAA    |
| chromosome | 905094 | BB_0845a |             | <b>0.759</b> ± 0.965 0.816 | <b>0.194</b> ± 0.193 0.275 | <b>0.356</b> ± 0.328 0.363 | <b>0.742</b> ± 0.659 0.708 | ATTACACAATAAAAAATAAAAAATGATTTTAAAGAAATTTAGTAACCTATA  |
| chromosome | 905412 | IG 95    |             | <b>0.892</b> ± 0.429 0.377 | <b>1.253</b> ± 0.420 0.225 | <b>0.694</b> ± 0.245 0.145 | <b>0.988</b> ± 0.415 0.922 | TGGTGTATTAGCTTTGCCCTTTTATTAATATTTTAACTAAGCTTTTGA     |
| chromosome | 905666 | BB_0845b |             | <b>0.856</b> ± 0.709 0.360 | <b>1.705</b> ± 1.451 0.306 | <b>0.710</b> ± 0.550 0.113 | <b>0.725</b> ± 0.658 0.169 | TCTTGTACATTTTCAATTTTACTAGCCATATGCTCAATAATGTATAG      |
| chromosome | 906234 | BB_0848a |             | <b>0.871</b> ± 0.554 0.619 | <b>0.623</b> ± 0.755 0.582 | <b>1.321</b> ± 0.931 0.666 | <b>0.352</b> ± 0.345 0.213 | CTTGCTTAAATTAAGATTTTTTATCTTTTTCATAATAATCTCTCTAT      |
| chromosome | 906896 | IG 96    |             | <b>1.158</b> ± 0.770 0.788 | <b>3.436</b> ± 2.744 0.103 | <b>1.097</b> ± 0.806 0.864 | <b>2.070</b> ± 2.000 0.289 | TACTTAAGATTGGAATCTCTATGAAATATATACTCGCTACCCATGTAAA    |
| chromosome | 906899 | IG 97    |             | <b>0.670</b> ± 0.130 0.092 | <b>0.694</b> ± 0.464 0.480 | <b>0.683</b> ± 0.172 0.019 | <b>0.855</b> ± 0.280 0.080 | GAGCATTAAAGCGTCCCTATAAAGGACTATCCATATTACAAAAATAACAAT  |
| chromosome | 906983 | IG 98    |             | <b>0.938</b> ± 0.798 0.323 | <b>1.364</b> ± 1.359 0.441 | <b>0.628</b> ± 0.453 0.114 | <b>0.871</b> ± 0.822 0.256 | GAGATGTAATAAAAAATATATTCTTATAATTATAAGATCTATGCTTAAAA   |
| chromosome | 906988 | IG 99    |             | <b>1.274</b> ± 0.279 0.211 | <b>1.815</b> ± 1.273 0.386 | <b>0.755</b> ± 0.204 0.187 | <b>1.082</b> ± 0.194 0.456 | CATCTATATTAATAGAAAGATGCAAAATATGTTGATCAAATGTTATTTTT   |
| chromosome | 907088 | IG 100   |             | <b>1.064</b> ± 0.268 0.712 | <b>1.617</b> ± 0.573 0.232 | <b>0.655</b> ± 0.164 0.138 | <b>0.728</b> ± 0.230 0.148 | AGGTTGCTATAAACACCAAGATATTTAATTTCTTTAAAAACCTTATTCA    |
| chromosome | 907788 | BB_0849b |             | <b>1.160</b> ± 0.956 0.821 | <b>1.275</b> ± 1.282 0.766 | <b>0.734</b> ± 0.471 0.513 | <b>1.158</b> ± 0.567 0.723 | TTTTATAGAAACACAATAAATTTTTTAGGAGATAAAGTGCTAATCATGGT   |

|              |        |          |                       |          |                       |         |                       |         |                       |         |                                                      |
|--------------|--------|----------|-----------------------|----------|-----------------------|---------|-----------------------|---------|-----------------------|---------|------------------------------------------------------|
| chromosome   | 908223 | BB_0849b | <b>0.919</b> ± 0.726  | 0.212    | <b>1.268</b> ± 1.333  | 0.535   | <b>0.858</b> ± 0.607  | 0.651   | <b>1.177</b> ± 0.828  | 0.005   | AATACTAAAAATTTAGTATAAATAAGGTAAGGAAAAAATAATAAAATTA    |
| chromosome   | 908782 | BB_0852  | <b>1.076</b> ± 0.412  | 0.572    | <b>0.838</b> ± 0.876  | 0.783   | <b>1.129</b> ± 1.140  | 0.810   | <b>1.478</b> ± 1.228  | 0.464   | ATATACCAAATCAACTCTCTTTGCTTGAGAACAATATTTTCAAATAAG     |
| chromosome   | 909197 | BB_0852  | <b>1.080</b> ± 0.827  | 0.793    | <b>1.020</b> ± 0.702  | 0.958   | <b>0.489</b> ± 0.316  | 0.307   | <b>0.847</b> ± 0.820  | 0.386   | TTATCTTTTATACCGAATCTGTGCATCTCTATGTCACITTTCTTGCTG     |
| chromosome   | 909453 | BB_0852  | <b>0.907</b> ± 0.141  | 0.516    | <b>1.239</b> ± 0.429  | 0.455   | <b>0.779</b> ± 0.364  | 0.447   | <b>1.156</b> ± 0.264  | 0.493   | TGTGCAAAAACCTCTTTTAAAAATTTGATGCTAGAGCAACAGTAATAGT    |
| chromosome   | 910040 | BB_0853  | <b>0.843</b> ± 0.681  | 0.560    | <b>1.576</b> ± 1.265  | 0.260   | <b>0.998</b> ± 0.652  | 0.993   | <b>0.981</b> ± 0.715  | 0.855   | AGAAAAATTGCAATAATAAAAAAGATTGAAATATCTTTATTAGAAAAGAAT  |
| plasmid_cp26 | 194    | BB_B01   | <b>0.307</b> ± 0.326  | 0.034    | <b>0.455</b> ± 0.451  | 0.014   | <b>0.891</b> ± 0.582  | 0.247   | <b>0.939</b> ± 0.694  | 0.440   | GTATTAAGAAAGCTACAATTTCTACCTTCCATCGTTGAGATTTTTTACA    |
| plasmid_cp26 | 346    | BB_B02   | <b>1.682</b> ± 0.228  | 0.017    | <b>1.166</b> ± 0.179  | 0.111   | <b>0.968</b> ± 0.107  | 0.572   | <b>1.168</b> ± 0.208  | 0.212   | CTTGTTAAACGAGAGGCAAGCCATAATAAAATTTTAAATCATTAAAT      |
| plasmid_cp26 | 383    | BB_B02   | <b>1.117</b> ± 0.369  | 0.652    | <b>0.672</b> ± 0.312  | 0.293   | <b>0.531</b> ± 0.257  | 0.118   | <b>0.637</b> ± 0.086  | 0.033   | TGTGCACAATATTAACCAAAAAAATAGGTTAAGGTACTTGTAAACGAGA    |
| plasmid_cp26 | 404    | BB_B02   | <b>1.435</b> ± 0.686  | 0.068    | <b>0.777</b> ± 0.357  | 0.422   | <b>0.886</b> ± 0.415  | 0.751   | <b>0.730</b> ± 0.320  | 0.332   | GCAAGACACTAGTTCTAAAAAATGTTGACTTTTAAATTTCAAAAACCT     |
| plasmid_cp26 | 552    | BB_B02   | <b>1.105</b> ± 0.977  | 0.846    | <b>1.553</b> ± 1.092  | 0.196   | <b>1.095</b> ± 0.908  | 0.867   | <b>1.786</b> ± 1.426  | 0.343   | TTTCGTGCAGTTTTTAAAAACAAGTTGTAATGTGGGCTTGATTAAT       |
| plasmid_cp26 | 757    | IG 101   | <b>1.600</b> ± 0.552  | 0.022    | <b>1.274</b> ± 0.393  | 0.388   | <b>0.808</b> ± 0.276  | 0.099   | <b>1.086</b> ± 0.421  | 0.495   | ATTTGTATGAAAAAGGTCCTCATATTTTTTAAAAAATTTTAAATCT       |
| plasmid_cp26 | 760    | IG 102   | <b>1.666</b> ± 0.317  | 0.046    | <b>1.130</b> ± 0.259  | 0.369   | <b>0.847</b> ± 0.190  | 0.184   | <b>1.090</b> ± 0.299  | 0.628   | TATAATATCTTATTAATAAAATATTTCTTAATATTTCCCAAATATATTGAT  |
| plasmid_cp26 | 801    | IG 103   | <b>1.653</b> ± 0.336  | 0.024    | <b>1.234</b> ± 0.710  | 0.565   | <b>0.804</b> ± 0.111  | 0.192   | <b>1.095</b> ± 0.256  | 0.639   | TTTGGGAAATATTAGGAAATATTTTATAAATAAGATTTATATAATTTGTA   |
| plasmid_cp26 | 2258   | IG 104   | <b>1.067</b> ± 0.392  | 0.579    | <b>0.842</b> ± 0.306  | 0.616   | <b>0.696</b> ± 0.368  | 0.165   | <b>0.955</b> ± 0.382  | 0.796   | TAAGCATATTTTTTAAAAACAGAAATTTTTACTTAGCTAAAGATTTTAA    |
| plasmid_cp26 | 2276   | IG 105   | <b>1.397</b> ± 0.565  | 0.221    | <b>1.232</b> ± 0.739  | 0.562   | <b>0.784</b> ± 0.259  | 0.049   | <b>1.076</b> ± 0.509  | 0.809   | TATAATGTACTAGGATGCATAATAAACCAAGAAATATTTCTATTCACAC    |
| plasmid_cp26 | 2280   | IG 106   | <b>1.585</b> ± 1.471  | 0.459    | <b>1.722</b> ± 1.129  | 0.426   | <b>0.751</b> ± 0.294  | 0.315   | <b>0.975</b> ± 0.654  | 0.832   | ATATGTACTAGGATGCATAATAAACCAAGAAATATTTCTATTCACACCGAT  |
| plasmid_cp26 | 2290   | IG 107   | <b>1.680</b> ± 0.380  | 0.073    | <b>1.016</b> ± 0.254  | 0.848   | <b>0.802</b> ± 0.490  | 0.575   | <b>0.868</b> ± 0.664  | 0.767   | GGATGCATAATAAACCAAGAAATATTTCTATTCACACCGATAATCTTTT    |
| plasmid_cp26 | 2350   | IG 108   | <b>1.885</b> ± 0.424  | 0.081    | <b>1.560</b> ± 0.824  | 0.386   | <b>0.992</b> ± 0.348  | 0.972   | <b>1.369</b> ± 0.277  | 0.186   | AATCATAAAAAATAAACTTGAATTTTAAATAAATCTTTTATCTCCCAA     |
| plasmid_cp26 | 2419   | IG 109   | <b>1.525</b> ± 0.492  | 0.086    | <b>0.917</b> ± 0.207  | 0.021   | <b>0.844</b> ± 0.319  | 0.198   | <b>1.024</b> ± 0.241  | 0.531   | TTTATAAATAGCTCTTTTTTGGGAGATAAAAAGATTTTATTTAAATTCGA   |
| plasmid_cp26 | 2519   | BB_B04   | <b>0.879</b> ± 0.466  | 0.624    | <b>1.560</b> ± 1.783  | 0.544   | <b>0.737</b> ± 0.499  | 0.207   | <b>1.357</b> ± 0.783  | 0.068   | ATAAAGGGTAAATACATAAACTGAAATAATCAATAATAAAAACTAGA      |
| plasmid_cp26 | 2538   | BB_B04   | <b>0.765</b> ± 0.645  | 0.702    | <b>0.725</b> ± 0.310  | 0.335   | <b>0.818</b> ± 0.417  | 0.183   | <b>1.026</b> ± 0.459  | 0.887   | TTTATGTATTTACCTTTATTAAGCGTATGATAAGGCTCTACTTTTGCGAC   |
| plasmid_cp26 | 2660   | BB_B04   | <b>0.705</b> ± 0.570  | 0.456    | <b>0.688</b> ± 0.470  | 0.353   | <b>0.723</b> ± 0.085  | 0.053   | <b>1.031</b> ± 0.133  | 0.782   | ATTCAAAAATTAGTAAGAGTATATGCAACAATATATAAATATAGGGATA    |
| plasmid_cp26 | 2694   | BB_B04   | <b>0.531</b> ± 0.373  | 0.272    | <b>0.850</b> ± 0.507  | 0.729   | <b>0.864</b> ± 0.205  | 0.118   | <b>1.252</b> ± 0.269  | 0.219   | TATTAATATAGGGATAAGTAAAAAAGGAATGCCTAATATAGGATTTAAAA   |
| plasmid_cp26 | 2768   | BB_B04   | <b>0.701</b> ± 0.578  | 0.238    | <b>0.684</b> ± 0.379  | 0.056   | <b>0.699</b> ± 0.225  | 0.066   | <b>0.871</b> ± 0.285  | 0.354   | GGTTCATTAATATTAAGAGCAGCGCAAATGAAAGTCTACCTATAGCC      |
| plasmid_cp26 | 2885   | BB_B04   | <b>0.389</b> ± 0.628  | 0.299    | <b>0.343</b> ± 0.386  | 0.132   | <b>0.292</b> ± 0.322  | 0.002   | <b>0.198</b> ± 0.136  | 0.053   | TTGGTGTGCTGGCGCAACCTTAGGCTTGCTATTGTCTATGATGCTTAGTA   |
| plasmid_cp26 | 2963   | BB_B04   | <b>0.863</b> ± 1.251  | 0.882    | <b>1.773</b> ± 2.442  | 0.424   | <b>1.543</b> ± 1.454  | 0.581   | <b>1.274</b> ± 1.275  | 0.671   | GAATCAAGATTTGACAAAATTATAGGATTAAGAAGACCAATAATCAATTTG  |
| plasmid_cp26 | 3039   | BB_B04   | <b>0.645</b> ± 0.720  | 0.196    | <b>0.027</b> ± 0.030  | 0.129   | <b>0.481</b> ± 0.702  | 0.108   | <b>0.184</b> ± 0.160  | 0.207   | TTATGGTTTTGTGGTCTTCATGGTACCAATGTTATTTATGCTCTCTTAAT   |
| plasmid_cp26 | 3861   | IG 110   | <b>0.180</b> ± 0.191  | 0.077    | <b>1.060</b> ± 0.680  | 0.909   | <b>0.668</b> ± 0.921  | 0.481   | <b>0.875</b> ± 0.614  | 0.796   | TAATATAATTTATCTCTCAATAAAAACTAATTAAGTTAATTAATGAC      |
| plasmid_cp26 | 4228   | BB_B05   | <b>0.856</b> ± 0.707  | 0.612    | <b>0.877</b> ± 0.377  | 0.011   | <b>1.026</b> ± 0.344  | 0.903   | <b>1.214</b> ± 0.443  | 0.375   | TAGTAAGCTCTGCCTTGTCAATTTCTTTGTTTTGGCATATCTAAAGCTT    |
| plasmid_cp26 | 4354   | BB_B05   | <b>0.757</b> ± 0.711  | 0.481    | <b>0.260</b> ± 0.304  | 0.164   | <b>0.408</b> ± 0.357  | 0.009   | <b>0.795</b> ± 0.588  | 0.624   | ATGTCTGCAATTCAGAATTAAGCATTTTTGAAGAATTAATCAATGTTTAC   |
| plasmid_cp26 | 4596   | BB_B06   | <b>0.618</b> ± 0.583  | 0.504    | <b>0.747</b> ± 0.685  | 0.682   | <b>1.046</b> ± 0.369  | 0.785   | <b>1.103</b> ± 0.418  | 0.092   | CTTGCAACCACAGTCAAGATTTAATAAAAAAAGACTTGAAGAAATCAAAAA  |
| plasmid_cp26 | 4956   | BB_B07   | <b>0.830</b> ± 0.325  | 0.462    | <b>1.143</b> ± 0.874  | 0.830   | <b>0.669</b> ± 0.451  | 0.471   | <b>0.901</b> ± 0.408  | 0.766   | ATAGGTTTCATCCGTTTTTATTTGCAATGCTAAGTAATCTTTGAATATG    |
| plasmid_cp26 | 5144   | BB_B07   | <b>1.373</b> ± 1.283  | 0.593    | <b>1.141</b> ± 1.177  | 0.464   | <b>0.856</b> ± 0.892  | 0.808   | <b>1.037</b> ± 1.009  | 0.901   | AGCAATATAAATAACATATTGATACAATAATGATTTTAAAGCCTAATATA   |
| plasmid_cp26 | 5163   | BB_B07   | <b>1.312</b> ± 0.630  | 0.340    | <b>0.684</b> ± 0.545  | 0.514   | <b>0.863</b> ± 0.144  | 0.280   | <b>0.967</b> ± 0.205  | 0.832   | TTGATACAATAATGATTTTAAAGCCTAATATAAAAAATTTACTTTGGGTGTC |
| plasmid_cp26 | 5217   | BB_B07   | <b>0.841</b> ± 0.336  | 0.394    | <b>1.430</b> ± 0.850  | 0.490   | <b>0.741</b> ± 0.249  | 0.348   | <b>0.833</b> ± 0.298  | 0.515   | ATTTTTATCTCACAAATATACAGGACTTCAAGAAATTTCTTTAAAGAAA    |
| plasmid_cp26 | 5233   | BB_B07   | <b>2.338</b> ± 2.036  | 0.236    | <b>1.157</b> ± 1.188  | 0.850   | <b>0.961</b> ± 0.805  | 0.847   | <b>0.926</b> ± 0.593  | 0.892   | TTTGTGAGGATAAAAAATTATGACACCCAAGTAAATTTTTTATATTAGGCTT |
| plasmid_cp26 | 5696   | BB_B07   | <b>1.534</b> ± 0.126  | 0.015    | <b>1.642</b> ± 0.897  | 0.348   | <b>0.886</b> ± 0.078  | 0.010   | <b>1.046</b> ± 0.065  | 0.027   | GGATGTCTCTTTTTTAAATTCATTTGGAGAATGTACAGGAAATTTTTTAT   |
| plasmid_cp26 | 5809   | BB_B07   | <b>0.831</b> ± 0.367  | 0.616    | <b>0.925</b> ± 0.678  | 0.862   | <b>0.548</b> ± 0.245  | 0.140   | <b>0.992</b> ± 0.478  | 0.977   | TATTTTCATCATTGATTTTCCCAACTACGTTTACAAGACCATTATTTGG    |
| plasmid_cp26 | 5816   | BB_B07   | <b>2.844</b> ± 1.048  | 0.034    | <b>0.924</b> ± 0.615  | 0.867   | <b>1.016</b> ± 0.694  | 0.978   | <b>0.822</b> ± 0.269  | 0.318   | CTTGAAAAATAGAACCTTGGGAAAAATCAAAATATAGAAAAATAATAA     |
| plasmid_cp26 | 5863   | BB_B07   | <b>3.253</b> ± 2.363  | 0.212    | <b>2.655</b> ± 1.888  | 0.199   | <b>0.942</b> ± 0.547  | 0.718   | <b>1.439</b> ± 1.026  | 0.587   | TTTATTTCTATTTTGAATTTTTCCCAAGTCTTATTTTTTCAAGTAG       |
| plasmid_cp26 | 5872   | IG 111   | <b>1.528</b> ± 1.484  | 0.285    | <b>1.883</b> ± 2.089  | 0.332   | <b>0.835</b> ± 0.783  | 0.252   | <b>0.961</b> ± 0.875  | 0.610   | GTGCATTTATTTTCTATTTTGAATTTTTCCCAAGTCTTATTTT          |
| plasmid_cp26 | 6559   | IG 112   | <b>3.213</b> ± 3.440  | 0.253    | <b>1.229</b> ± 1.1233 | 0.21912 | <b>0.818</b> ± 0.6245 | 0.36591 | <b>0.365</b> ± 0.2297 | 0.21704 | AAGAAAAAGCTTGCAATAAAAGTATAACAAATCTTTAATAATTAATCAA    |
| plasmid_cp26 | 6572   | IG 113   | <b>1.417</b> ± 0.4524 | 0.306451 | <b>1.488</b> ± 0.6699 | 0.37893 | <b>0.853</b> ± 0.1287 | 0.07354 | <b>1.059</b> ± 0.2809 | 0.76287 | TGCAAGCTTTCTTAAATATAATATATTTTAGTATTTAATGAGAAAT       |
| plasmid_cp26 | 6806   | BB_B09   | <b>0.729</b> ± 0.1033 | 0.079702 | <b>0.243</b> ± 0.2166 | 0.03327 | <b>0.739</b> ± 0.2406 | 0.1929  | <b>0.794</b> ± 0.2981 | 0.40387 | TTATCGAGTCTTCTGAAATTTAGTTTTCTAATTTATGGTTGTATCGT      |
| plasmid_cp26 | 6845   | BB_B09   | <b>1.410</b> ± 0.4818 | 0.078106 | <b>1.12</b> ± 0.4323  | 0.18586 | <b>0.785</b> ± 0.3071 | 0.05399 | <b>0.95</b> ± 0.3174  | 0.66923 | CTCCCAATGGATATTTTATATCATAATTTCTGCTATTTATCGAGTCTT     |
| plasmid_cp26 | 6848   | BB_B09   | <b>1.465</b> ± 0.2079 | 0.006451 | <b>1.177</b> ± 0.2254 | 0.35769 | <b>0.817</b> ± 0.1376 | 0.09211 | <b>1.014</b> ± 0.253  | 0.92958 | TACAACCTTTAACAGAAAAAGAAATTTTAAAGTCAATATTTTCATCAA     |
| plasmid_cp26 | 6967   | BB_B09   | <b>0.579</b> ± 0.6509 | 0.053423 | <b>0.682</b> ± 0.7512 | 0.10495 | <b>0.617</b> ± 0.5871 | 0.16853 | <b>0.633</b> ± 0.5936 | 0.15054 | TAAAGCAGAACTCAAAGTAAATCTAGCTTTAATAAAAGCATTATCAGTAT   |
| plasmid_cp26 | 7043   | BB_B09   | <b>2.183</b> ± 1.4065 | 0.28316  | <b>1.031</b> ± 0.5856 | 0.95198 | <b>0.921</b> ± 0.4571 | 0.73738 | <b>1.112</b> ± 0.7466 | 0.78666 | ATAGATCTTGAATTAGTTAGTAAATACTGATAATGCTTTTATTAAGC      |
| plasmid_cp26 | 7150   | BB_B09   | <b>1.067</b> ± 0.5494 | 0.711468 | <b>0.905</b> ± 0.6131 | 0.67958 | <b>0.867</b> ± 0.3346 | 0.68499 | <b>0.432</b> ± 0.335  | 0.07553 | TGCTAAAAATACTCTTATTAATTTTAACTGTGCGATACGTTCCAATT      |

|              |       |        |                                            |                               |                               |                               |                                                     |
|--------------|-------|--------|--------------------------------------------|-------------------------------|-------------------------------|-------------------------------|-----------------------------------------------------|
| plasmid_cp26 | 7279  | BB_B09 | <b>4.760</b> ± 5.703 0.065273              | <b>1.144</b> ± 1.531 0.68366  | <b>3.034</b> ± 3.7036 0.18341 | <b>1.753</b> ± 2.6176 0.13119 | CATCTACAGTATGAAAATTCAAAATTTATTGAAAAATCAGACGCTCCCTC  |
| plasmid_cp26 | 7363  | BB_B09 | <b>2.298</b> ± 2.241 0.199864              | <b>0.837</b> ± 0.7642 0.57926 | <b>1.22</b> ± 1.07 0.79053    | <b>0.668</b> ± 0.7286 0.58608 | TTACCCCTGTGAAAATTTAAATATACTGTTTTGAAATTTAAGCTTATACTC |
| plasmid_cp26 | 7406  | BB_B09 | <b>0.708</b> ± 0.805 0.670064              | <b>1.621</b> ± 1.3569 0.01862 | <b>0.568</b> ± 0.6295 0.12368 | <b>1.45</b> ± 1.2268 0.14915  | AGCTTAAATTCAAAAACAGTATATTTAAATTTTCACAGGGGTAATAATTTG |
| plasmid_cp26 | 7520  | BB_B09 | <b>0.978</b> ± 0.6089 0.962995             | <b>0.249</b> ± 0.2435 0.22995 | <b>0.661</b> ± 0.48 0.41394   | <b>1.237</b> ± 0.8741 0.06283 | ATGTTTCTTTTATTGTTTTGAAATCTTTAAGGCTCTCACAGGAGGCTCCA  |
| plasmid_cp26 | 7634  | BB_B09 | <b>0.362</b> ± 0.6471 0.394478             | <b>1.558</b> ± 1.8703 0.58348 | <b>1.321</b> ± 1.4326 0.62225 | <b>1.704</b> ± 1.0791 0.39094 | TATAAACCACTCTTTTAAAATCTTAAAGAAGTAGATCATTGCATAAAA    |
| plasmid_cp26 | 9420  | BB_B12 | <b>1.003</b> ± 0.8028 0.97494              | <b>0.798</b> ± 0.5801 0.72537 | <b>0.317</b> ± 0.4307 0.09941 | <b>0.905</b> ± 1.0296 0.85483 | GTACAAGTTTTATATAATATTAAGAAAAAAAACCTTAGTCCAAAAAG     |
| plasmid_cp26 | 10843 | IG 114 | <b>1.825</b> ± 0.7275 0.137791             | <b>1.839</b> ± 1.6613 0.38557 | <b>1.119</b> ± 0.554 0.65552  | <b>1.128</b> ± 0.8298 0.72045 | ATATAGCCTCTATATCAATTCTATTTTGAATAAAAAATTTATTTTAAACTG |
| plasmid_cp26 | 10964 | BB_B14 | <b>1.936</b> ± 0.8772 0.114463             | <b>1.429</b> ± 0.733 0.27504  | <b>0.925</b> ± 0.2778 0.6206  | <b>1.083</b> ± 0.2807 0.44239 | GAAAGTCCAAAATTTTATTTTTTCAAGCTTAAATCTTCAATCCAATTC    |
| plasmid_cp26 | 11059 | BB_B14 | <b>1.683</b> ± 1.0738 0.260652             | <b>1.648</b> ± 1.2908 0.37076 | <b>0.913</b> ± 0.3603 0.58706 | <b>1.203</b> ± 0.5943 0.33727 | ATCATCCTTTCCAATAAAGATTTGGTCAAACAAATGATGAATAATTAATC  |
| plasmid_cp26 | 11145 | BB_B14 | <b>2.064</b> ± 1.3812 0.312532             | <b>1.569</b> ± 0.7471 0.29021 | <b>1.209</b> ± 0.5144 0.39558 | <b>1.151</b> ± 0.4116 0.37256 | GCTTACTTTCCCTCAATTTTGTCCATCCAGCAGCAATAAAGGATTCTG    |
| plasmid_cp26 | 11183 | BB_B14 | <b>0.922</b> ± 1.1658 0.942647             | <b>0.751</b> ± 0.7499 0.74014 | <b>0.314</b> ± 0.3918 0.24488 | <b>0.754</b> ± 0.9042 0.77053 | TTGCTGCTGGATGGAACAAAATGAGGGAAAAAGTAAGCTACAAAAGAGAT  |
| plasmid_cp26 | 11203 | BB_B14 | <b>1.372</b> ± 0.4028 0.218904             | <b>1.167</b> ± 0.453 0.5568   | <b>0.913</b> ± 0.0537 0.09599 | <b>0.985</b> ± 0.1551 0.84897 | TAACAGAACAGAATCCTTTATTGCTGCTGGATGGAACAAAATGAGGGAA   |
| plasmid_cp26 | 11234 | BB_B14 | <b>1.325</b> ± 0.6328 0.521635             | <b>1.327</b> ± 0.6425 0.49773 | <b>0.936</b> ± 0.3759 0.83436 | <b>0.868</b> ± 0.2988 0.62433 | CTATTTTAGTTATTCTGTTTTATAATTAATAAAATCCCTTAAAGTCTGCTG |
| plasmid_cp26 | 11239 | BB_B14 | <b>1.611</b> ± 0.4511 0.058488             | <b>1.062</b> ± 0.3462 0.75488 | <b>1.02</b> ± 0.2047 0.85353  | <b>0.763</b> ± 0.1939 0.1315  | AAATAGTATTATACACAAGGTTTAGAAACCATAGTATAACAGAACAGAATC |
| plasmid_cp26 | 11266 | BB_B14 | <b>1.067</b> ± 0.2158 0.686256             | <b>1.126</b> ± 0.1154 0.28797 | <b>0.844</b> ± 0.1354 0.05586 | <b>1.024</b> ± 0.132 0.82598  | TTTTTAATTAATAAACAGGAATAACTAAAATAGTATTATACACAAGGTTTA |
| plasmid_cp26 | 11304 | BB_B14 | <b>1.584</b> ± 0.574 0.20789               | <b>1.626</b> ± 0.841 0.35566  | <b>1.332</b> ± 0.2135 0.06795 | <b>1.052</b> ± 0.3541 0.86171 | TATTTCAATGTTTTTCCAATTTGATCGTGCTCAACGTTAAGGAAGTGCA   |
| plasmid_cp26 | 11306 | BB_B14 | <b>1.626</b> ± 0.7113 0.111719             | <b>1.3</b> ± 0.8594 0.30288   | <b>0.838</b> ± 0.3346 0.31817 | <b>1.002</b> ± 0.3835 0.99445 | TTCTAAATGTTTTTCCAATTTGATCGTGCTCAACGTTAAGGAAGTGCAAG  |
| plasmid_cp26 | 11360 | BB_B14 | <b>1.542</b> ± 1.562 0.110069              | <b>0.508</b> ± 0.6077 0.09121 | <b>0.702</b> ± 0.5883 0.55106 | <b>0.91</b> ± 0.8915 0.79869  | ATATCTTGCACTTCTTAAACGTTGAGCAGCATCAATTTGAAAAACATTT   |
| plasmid_cp26 | 11409 | BB_B14 | <b>1.163</b> ± 0.1349 0.053551             | <b>0.898</b> ± 0.1539 0.3942  | <b>0.85</b> ± 0.0498 0.02003  | <b>0.999</b> ± 0.15 0.994     | TAATATCATATTCCTCTCTTTGATAAAAAAATTATAAACTAGTGAACATA  |
| plasmid_cp26 | 11414 | BB_B14 | <b>2.601</b> ± 2.8257 0.08203              | <b>0.522</b> ± 0.928 0.60583  | <b>1.59</b> ± 1.722 0.45278   | <b>1.746</b> ± 1.7924 0.44365 | TCATATTCCTCTCTTTGATAAAAAAATTATAAACTAGTGAACATAATAAT  |
| plasmid_cp26 | 11457 | IG 115 | <b>1.213</b> ± 0.2473 0.345106             | <b>1.17</b> ± 0.554 0.67082   | <b>0.678</b> ± 0.2644 0.12656 | <b>0.901</b> ± 0.1776 0.54101 | TGTTCACTAGTTTATAATTTTTTATCAAAGGAGAGGAATATGATATTATA  |
| plasmid_cp26 | 11475 | IG 116 | <b>0.246</b> ± 0.3442 0.345813             | <b>0.19</b> ± 0.2166 0.27199  | <b>0.209</b> ± 0.321 0.34964  | <b>0.561</b> ± 0.7672 0.32466 | ATAAAAAATATATTATTTATGTTCACTAGTTTATAATTTTTTATCAAAGGA |
| plasmid_cp26 | 11640 | IG 117 | <b>1.522</b> ± 0.5196 0.016736             | <b>1.523</b> ± 0.645 0.06691  | <b>0.932</b> ± 0.2984 0.64701 | <b>1.039</b> ± 0.3015 0.68726 | TACAAGAACTTTCTTGCTTTTAAACACCTTTTAAAGAGTTTAAAACTTT   |
| plasmid_cp26 | 11837 | IG 118 | <b>1.617</b> ± 0.7518 0.138914             | <b>1.389</b> ± 0.8833 0.56518 | <b>1.028</b> ± 0.5312 0.53591 | <b>1.36</b> ± 0.7223 0.28841  | TTGCTTGCTCCAATGGTTATATACATATAAAAAAATTTTTAAATTTA     |
| plasmid_cp26 | 12069 | BB_B16 | <b>0.216</b> ± 0.2361 0.157382             | <b>0.412</b> ± 0.4873 0.20586 | <b>0.523</b> ± 0.5011 0.25253 | <b>1.242</b> ± 1.4417 0.57666 | AGTAAAATTAATTTGAGAATAATACAACCTTTAACTTTTTATCAATATT   |
| plasmid_cp26 | 12693 | BB_B16 | <b>0.116</b> ± 0.0999 0.09858              | <b>0.35</b> ± 0.3844 0.09011  | <b>0.968</b> ± 0.6456 0.82457 | <b>0.791</b> ± 0.4741 0.65144 | TTATTTTCAAGAACAACCTTTCAATTTAAACTCAGATTTTAAATTTG     |
| plasmid_cp26 | 12732 | BB_B16 | <b>0.054</b> ± 0.0083 0.033415             | <b>0.221</b> ± 0.2213 0.09388 | <b>0.64</b> ± 0.3671 0.21346  | <b>0.517</b> ± 0.3474 0.28168 | TTATATTTTTTGTACAGATAATGCAATTCAGCTTAAATATGATTTTAA    |
| plasmid_cp26 | 12750 | BB_B16 | <b>0.018</b> ± 0.0339 0.160576             | <b>0.008</b> ± 0.0162 0.16326 | <b>1.213</b> ± 0.9853 0.6626  | <b>1.155</b> ± 1.8519 0.77978 | TCTGTGACAAAAATATAACTGTCAAGAACAACATCTTTGGAATTATAA    |
| plasmid_cp26 | 13146 | BB_B16 | <b>0.528</b> ± 0.5726 0.18674              | <b>0.839</b> ± 0.8579 0.39444 | <b>1.426</b> ± 1.4966 0.50924 | <b>1.728</b> ± 1.1135 0.11437 | TTGACTTTACTTTTAAATAAAGGAAAATTAATACCATTTGGGATATCTGCA |
| plasmid_cp26 | 13469 | BB_B16 | <b>0.134</b> ± 0.1336 0.006824             | <b>0.417</b> ± 0.376 0.02301  | <b>1.131</b> ± 0.3278 0.54606 | <b>0.935</b> ± 0.382 0.31234  | TTATTGCTTCTGCTTTTTTGAATTTCTGCTTTTTAAAAATATCTCTCT    |
| plasmid_cp26 | 13728 | IG 119 | <b>0.239</b> ± 0.2639 0.130732             | <b>0.102</b> ± 0.1919 0.21807 | <b>1.575</b> ± 1.4913 0.60587 | <b>0.651</b> ± 0.8179 0.57962 | TTTTAAAAATAAATAATCTAAAATAATTAAGTTAAAGAAATGAATCTTAAT |
| plasmid_cp26 | 13867 | IG 120 | <b>1.350</b> ± 0.6817 0.476099             | <b>0.329</b> ± 0.3789 0.09622 | <b>0.521</b> ± 0.2437 0.03812 | <b>1.171</b> ± 0.6577 0.69137 | TTTTAATTTGATAAATGTTTTTATTTTATGTTATGCTAAAAACATCGTGA  |
| plasmid_cp26 | 13879 | IG 121 | <b>1.635</b> ± 0.2901 0.006737             | <b>1.519</b> ± 0.5636 0.16748 | <b>0.706</b> ± 0.0934 0.02872 | <b>0.989</b> ± 0.1425 0.8516  | AATGTTTTTATTTTTATGTTATGCTAAAAACATCGTGAGGATGGGATTCT  |
| plasmid_cp26 | 13931 | BB_B17 | <b>2.445</b> ± 0.6658 0.057584             | <b>1.652</b> ± 0.3941 0.11706 | <b>0.866</b> ± 0.1601 0.44074 | <b>1.363</b> ± 0.3585 0.28822 | AAAGAATCCCATCCTCAGATGTTTTGACATAACATAAAAAATAAAAAACA  |
| plasmid_cp26 | 13949 | BB_B17 | <b>2.076</b> ± 1.4808 0.002679             | <b>2.357</b> ± 3.2373 0.49366 | <b>1.215</b> ± 0.9174 0.28841 | <b>1.611</b> ± 1.1227 0.16547 | TTTTTACAACTTGAATTTATTTTTAAATCAGATTTGTGCTGCTCCTA     |
| plasmid_cp26 | 14428 | BB_B17 | <b>1.871</b> ± 0.6895 0.139297             | <b>1.389</b> ± 0.7713 0.54745 | <b>0.873</b> ± 0.3947 0.13714 | <b>1.141</b> ± 0.3877 0.57673 | CTACCCGGACCTATTCTACTCTTTTAAACAATCTGCTCTACATTTAAAA   |
| plasmid_cp26 | 14471 | BB_B17 | <b>1.904</b> ± 0.9755 0.145187             | <b>1.775</b> ± 1.1758 0.39527 | <b>1.059</b> ± 0.9212 0.85954 | <b>0.876</b> ± 0.5009 0.55436 | AGTGAGGAGCAGATTGTTTAAAGTAGGAATAGGTCGGGGTAGTATATGC   |
| plasmid_cp26 | 14518 | BB_B17 | <b>2.817</b> ± 2.665 0.375221              | <b>1.525</b> ± 1.55 0.64616   | <b>1.083</b> ± 1.1538 0.90816 | <b>1.213</b> ± 2.1142 0.87142 | AGGTCTAAGTTGGGTACTTGGTTTTAATTTTTTTGATAAGCTCTATTATT  |
| plasmid_cp26 | 14606 | BB_B17 | <b>1.854</b> ± 1.3138 0.321181             | <b>0.815</b> ± 0.656 0.70519  | <b>0.661</b> ± 0.5084 0.56815 | <b>1.04</b> ± 0.6837 0.93856  | TATCTACATGTGCTTTTACAAGCTCTTCAACTCGTTCTATGGTATCAATAT |
| plasmid_cp26 | 15059 | BB_B17 | <b>2.100</b> ± 0.7335 0.086909             | <b>0.652</b> ± 0.6861 0.44835 | <b>0.729</b> ± 0.3609 0.25955 | <b>1.116</b> ± 0.4759 0.50131 | AAGACACATCATCAAAGTTAAAGCTCTTTTGTATCTATTGTCGATAAA    |
| plasmid_cp26 | 15095 | BB_B17 | <b>1.088</b> ± 1.1895 0.87935              | <b>0.983</b> ± 0.9769 0.97436 | <b>0.705</b> ± 0.989 0.75579  | <b>1.043</b> ± 1.5786 0.97121 | TCITATTTGGCATAAAATTTCTTTTTATTGTTCTATTATCCCACTTCTA   |
| plasmid_cp26 | 15172 | BB_B18 | <i>guaA</i> <b>2.022</b> ± 0.606 0.035135  | <b>1.341</b> ± 0.6173 0.46973 | <b>0.936</b> ± 0.3099 0.57692 | <b>1.174</b> ± 0.3803 0.44574 | TCATAACAACTCTATTTATACCCGAACCTCATTAAATTTCTGGAAGAA    |
| plasmid_cp26 | 15205 | BB_B18 | <i>guaA</i> <b>1.249</b> ± 1.6597 0.517966 | <b>1.331</b> ± 1.2696 0.24141 | <b>0.596</b> ± 0.5397 0.31752 | <b>0.514</b> ± 0.8016 0.04405 | ATGAAGTTCCGGGTATAAATAGAGTTGTTATGATATATCTTCAAGCCTC   |
| plasmid_cp26 | 15212 | BB_B18 | <i>guaA</i> <b>1.667</b> ± 0.9065 0.229071 | <b>1.623</b> ± 0.9575 0.31872 | <b>1.029</b> ± 0.4991 0.27318 | <b>1.006</b> ± 0.4255 0.98809 | TTCTTGAAGAACTTTTTAAAAAACTGTAAGGAAGTTCAAGTCCATCTG    |
| plasmid_cp26 | 15296 | BB_B18 | <i>guaA</i> <b>1.908</b> ± 0.4541 0.004581 | <b>1.454</b> ± 0.5043 0.31133 | <b>0.903</b> ± 0.3343 0.31426 | <b>1.006</b> ± 0.3093 0.97468 | ATTAGATGTGTAATAACCAAGACTTCATGACTGCAGAATGGACTGAACCT  |
| plasmid_cp26 | 15304 | BB_B18 | <i>guaA</i> <b>1.560</b> ± 0.7462 0.246289 | <b>1.455</b> ± 1.6721 0.71809 | <b>0.471</b> ± 0.2427 0.08789 | <b>0.68</b> ± 0.4658 0.09758  | CAGCTGAATTAGATGTGTAATACCCAAGACTTCATGACTGCAGAATGGA   |
| plasmid_cp26 | 15484 | BB_B18 | <i>guaA</i> <b>1.331</b> ± 0.8149 0.338171 | <b>0.825</b> ± 0.6416 0.76247 | <b>0.838</b> ± 0.5642 0.243   | <b>0.682</b> ± 0.2752 0.07975 | GCTAGTCTGGCCGGGAAATGGATGTCTGTAAGAGATTCTTTTTAATA     |
| plasmid_cp26 | 15849 | BB_B18 | <i>guaA</i> <b>1.969</b> ± 0.4477 0.075503 | <b>1.845</b> ± 1.121 0.34591  | <b>0.847</b> ± 0.0866 0.07483 | <b>1.031</b> ± 0.1431 0.71597 | TTTTATATTTAAATCATATTGATGCTTAAATCTAGTATTTTTTATCTTC   |
| plasmid_cp26 | 15853 | BB_B18 | <i>guaA</i> <b>1.717</b> ± 0.3232 0.023979 | <b>1.337</b> ± 0.5219 0.4336  | <b>0.883</b> ± 0.2771 0.04499 | <b>0.869</b> ± 0.1878 0.16012 | TAAAATATATTGATGCTCTACAAAATCTTGAACCGTTAAAAAATAAA     |



|                |       |        |                                |                               |                               |                               |                                                       |
|----------------|-------|--------|--------------------------------|-------------------------------|-------------------------------|-------------------------------|-------------------------------------------------------|
| plasmid_cp26   | 21328 | BB_B24 | <b>1.484</b> ± 0.1259 0.01144  | <b>1.244</b> ± 0.205 0.24366  | <b>0.83</b> ± 0.1082 0.01807  | <b>1.028</b> ± 0.1612 0.8153  | TGTAAGTTTTTTTATAAAATTTTGTTTTTAAATGCATATTCTAAAGTATTT   |
| plasmid_cp26   | 21420 | BB_B25 | <b>1.299</b> ± 0.847 0.081476  | <b>1.057</b> ± 0.5726 0.6942  | <b>0.836</b> ± 0.5022 0.33037 | <b>1.08</b> ± 0.6857 0.49506  | TTGCAAGGTATCCTTAGTCCAAACCTGAAAAAGATCCTCATTAATAAAAA    |
| plasmid_cp26   | 23099 | BB_B27 | <b>1.844</b> ± 1.4327 0.052779 | <b>1.133</b> ± 0.8485 0.70428 | <b>0.914</b> ± 0.8492 0.67502 | <b>0.774</b> ± 0.7403 0.25032 | TATCTTTGGTAAAAATACCAGAAAAAGATAAAATTAATCTGTTTTAT       |
| plasmid_cp26   | 23100 | BB_B27 | <b>1.562</b> ± 0.4181 0.085936 | <b>0.955</b> ± 0.3257 0.44454 | <b>0.863</b> ± 0.2345 0.57679 | <b>1.626</b> ± 0.3866 0.09107 | TAGTTGAAACAACCATAAAAACAATAAAAAATAAACCGGATATTTAAAACTCT |
| plasmid_cp26   | 23194 | IG_124 | <b>0.832</b> ± 0.9301 0.468929 | <b>0.495</b> ± 0.8257 0.54668 | <b>0.566</b> ± 0.7293 0.24471 | <b>1.302</b> ± 1.4244 0.58886 | CTTTACTTTATTTTACTAAAAGCATACAATTAGGCATTAATGAAGAAGTT    |
| plasmid_cp26   | 23240 | IG_125 | <b>2.121</b> ± 1.2788 0.103098 | <b>1.302</b> ± 0.9034 0.54658 | <b>0.887</b> ± 0.5231 0.69981 | <b>1.269</b> ± 1.1337 0.72324 | AAGTTATTTTTTAAATTATATCAAAATATTTCTATATTTTTATTACTTTA    |
| plasmid_cp26   | 23253 | IG_126 | <b>2.589</b> ± 2.1444 0.299333 | <b>2.112</b> ± 2.111 0.49371  | <b>1.443</b> ± 1.2136 0.3282  | <b>1.706</b> ± 1.2195 0.17968 | AAATGAGTTATTATGTGCTAAGCAAAATATTTCTATATTCTGGGTACCTTG   |
| plasmid_cp26   | 23266 | BB_B28 | <b>1.785</b> ± 0.6797 0.063707 | <b>1.247</b> ± 1.7995 0.82693 | <b>1.139</b> ± 0.8024 0.83022 | <b>0.869</b> ± 0.2873 0.06933 | TGTGCTAAGCAAAATATTTCTATATTCTGGGTACCTTTTATTGGACTTTT    |
| plasmid_cp26   | 23270 | BB_B28 | <b>1.636</b> ± 0.6236 0.054952 | <b>0.87</b> ± 0.5813 0.56405  | <b>0.866</b> ± 0.3299 0.05916 | <b>1.024</b> ± 0.5234 0.91718 | GCACATAATAACTCATTTTACATCCITTTTAAAGTTTATTTTTAAATTATAT  |
| plasmid_cp26   | 23342 | BB_B28 | <b>2.107</b> ± 0.8396 0.007659 | <b>1.05</b> ± 0.6228 0.70924  | <b>0.88</b> ± 0.4536 0.01994  | <b>1.29</b> ± 0.6775 0.15521  | AATTTTTATTGAAAATTGTAAGATAAAAAATCCAATAACAAGGTACCCAG    |
| plasmid_cp26   | 23421 | BB_B28 | <b>1.419</b> ± 0.4609 0.017404 | <b>0.822</b> ± 0.35 0.02301   | <b>0.729</b> ± 0.3239 0.03145 | <b>0.905</b> ± 0.2608 0.51519 | GTTCAAATTTATCTTATTACTCCAGAAAGCAATTATTAGAAGATTTTA      |
| plasmid_cp26   | 23437 | BB_B28 | <b>1.548</b> ± 0.5847 0.006443 | <b>1.192</b> ± 0.5191 0.07214 | <b>0.673</b> ± 0.2252 0.26884 | <b>1.089</b> ± 0.4978 0.44467 | ATAAGATAAATTTGAACTAATAATAAAAGAGTAAAAAAGTTAAATAATA     |
| plasmid_cp26   | 23590 | BB_B28 | <b>1.057</b> ± 1.2391 0.942622 | <b>0.2</b> ± 0.1689 0.05697   | <b>1.738</b> ± 2.071 0.58317  | <b>1.115</b> ± 0.9397 0.86685 | TAGTGGATCAAATTTTGCATCAATCCATTCTTATTGGTACTGGAAAAAT     |
| plasmid_cp26   | 23593 | BB_B28 | <b>1.836</b> ± 0.1537 0.010038 | <b>1.09</b> ± 0.1576 0.41149  | <b>0.903</b> ± 0.0965 0.21531 | <b>1.179</b> ± 0.2528 0.34083 | TACAGTGTAAATGCTAGTTTTGAGAAATATGCTAAAAACATTGGAAAAAG    |
| plasmid_cp26   | 23682 | BB_B28 | <b>1.035</b> ± 0.2028 0.738283 | <b>0.634</b> ± 0.5475 0.44677 | <b>0.899</b> ± 0.3433 0.51256 | <b>1.381</b> ± 0.2747 0.13716 | GGACAACAAATTCAGAAATTAAGAAAAACTAGAACAAATAAAGAAAAATA    |
| plasmid_cp26   | 23733 | BB_B28 | <b>0.968</b> ± 0.1723 0.79112  | <b>0.585</b> ± 0.5194 0.32992 | <b>0.851</b> ± 0.0716 0.02147 | <b>1.131</b> ± 0.1568 0.17992 | ATATTTTTCTTTTATTTGTTCTAGTTTTCTTTAATTTCTGAATTTGTTGTC   |
| plasmid_cp26   | 23755 | BB_B28 | <b>0.998</b> ± 0.821 0.995802  | <b>0.493</b> ± 0.6777 0.56724 | <b>1.116</b> ± 0.9602 0.72811 | <b>1.631</b> ± 1.6922 0.09124 | TAAATACCTATTCTAAATGGAGAAAAATCAGAAATAAGTATTGATGAGAA    |
| plasmid_cp26   | 23793 | BB_B28 | <b>1.787</b> ± 0.5514 0.035659 | <b>1.07</b> ± 0.4341 0.47897  | <b>0.84</b> ± 0.2587 0.1863   | <b>1.202</b> ± 0.4916 0.36913 | CTTATTTCTGATTTTCTCCATTTAGAATAGGTAATTTATATTTATTATAA    |
| plasmid_cp26   | 23913 | BB_B28 | <b>1.877</b> ± 0.5852 0.074192 | <b>1.137</b> ± 0.2976 0.27988 | <b>0.82</b> ± 0.1249 0.12021  | <b>1.182</b> ± 0.1405 0.11568 | AAGTTAGATTGATCTAATCCAGAAAAATAAACATAAACTTCAAGAAGC      |
| plasmid_cp26   | 23977 | BB_B28 | <b>1.247</b> ± 0.1066 0.038809 | <b>0.84</b> ± 0.0553 0.02344  | <b>0.633</b> ± 0.2571 0.12635 | <b>0.704</b> ± 0.2808 0.23817 | GTAACGTTTATTAGTTCCTTGAAGTTTATGTTTTTTTCTGGGATTAG       |
| plasmid_cp26   | 24046 | BB_B28 | <b>1.883</b> ± 1.3899 0.165126 | <b>0.535</b> ± 0.3921 0.16719 | <b>1.126</b> ± 0.1039 0.81382 | <b>0.938</b> ± 0.8866 0.71961 | ATAAGGGCTCATGTCTATATTTTTTATAATTTCTATGGGAGTGATAAT      |
| plasmid_cp26   | 24116 | BB_B28 | <b>1.861</b> ± 0.7812 0.198887 | <b>1.494</b> ± 0.763 0.07181  | <b>1.127</b> ± 0.5238 0.38679 | <b>0.87</b> ± 0.3447 0.50363  | TACATTGAGAAAAAAGCAACTACAAAAATTTAACTGAAATGATAAACTT     |
| plasmid_cp26   | 24216 | BB_B28 | <b>1.517</b> ± 1.1336 0.436246 | <b>0.58</b> ± 0.4947 0.48843  | <b>0.332</b> ± 0.2864 0.17134 | <b>0.632</b> ± 0.5212 0.53181 | TTTAGTGAAAAAATATTATTATTTTTTAATAAAAAATCTTAAAAATCATCA   |
| plasmid_cp26   | 24266 | BB_B28 | <b>1.849</b> ± 1.0489 0.151922 | <b>0.883</b> ± 0.4721 0.78476 | <b>0.756</b> ± 0.5613 0.6761  | <b>1.158</b> ± 0.6337 0.5187  | AAAGCAAAAAGTATTATAAATTTAATAACAAAAGAAATTAATATTAAT      |
| plasmid_cp26   | 24608 | IG_127 | <b>0.838</b> ± 0.7094 0.592613 | <b>0.923</b> ± 0.9141 0.8209  | <b>1.535</b> ± 0.9492 0.4984  | <b>1.401</b> ± 1.0116 0.41975 | TAGCAATGCTTTATAACAAATGCCATGAAATTAAGGGAAAAACAATCTT     |
| plasmid_cp26   | 24850 | BB_B29 | <b>0.094</b> ± 0.1173 0.03747  | <b>0.327</b> ± 0.3856 0.12484 | <b>1.796</b> ± 1.3016 0.21371 | <b>0.336</b> ± 0.4504 0.10139 | GATATAGATGCTGATGATGTTGACATAATTTCCCTTTTTTAAAGTGCA      |
| plasmid_cp26   | 25022 | BB_B29 | <b>0.109</b> ± 0.1358 0.167427 | <b>0.303</b> ± 0.4026 0.25666 | <b>2.47</b> ± 2.1534 0.13268  | <b>0.139</b> ± 0.2034 0.16892 | AAGATTGAGTTAGCAACAGTTCCTTTTCCAAGGACTTCTCTAATCCATA     |
| plasmid_cp26   | 25102 | BB_B29 | <b>0.142</b> ± 0.0685 0.010599 | <b>0.349</b> ± 0.1941 0.01444 | <b>2.494</b> ± 0.9087 0.08454 | <b>0.246</b> ± 0.0681 0.00715 | GCAAGTCCGATTGGAATTGCCGCTGCAACATTAAGGGCAGATTAGCAAAA    |
| plasmid_cp26   | 25170 | BB_B29 | <b>0.168</b> ± 0.2756 0.229554 | <b>0.924</b> ± 1.686 0.72611  | <b>2.485</b> ± 3.691 0.23778  | <b>0.169</b> ± 0.291 0.22329  | AATGGGATTTTGACATACAAGGAATCACACCAGAAAGCGCAAGCTTAAAA    |
| plasmid_cp26   | 25233 | BB_B29 | <b>0.066</b> ± 0.0651 0.058903 | <b>0.275</b> ± 0.3517 0.01269 | <b>3.125</b> ± 1.9325 0.044   | <b>0.09</b> ± 0.0553 0.06758  | ATTTCAAATAGTCTTTTAAAGCTTGGCTTTCTGGTGTGATTCCTTGATGT    |
| plasmid_cp26   | 25452 | BB_B29 | <b>0.138</b> ± 0.0809 0.010892 | <b>0.441</b> ± 0.5891 0.12083 | <b>2.442</b> ± 1.5172 0.17766 | <b>0.161</b> ± 0.0448 0.02048 | CCACAACATTGGCATTGTAGTTACAATTTGGCACAAATCTGTGCCCCCAA    |
| plasmid_cp26   | 25464 | BB_B29 | <b>0.002</b> ± 0.004 0.093547  | <b>0.028</b> ± 0.0507 0.09195 | <b>0.195</b> ± 0.2032 0.07433 | <b>0</b> ± 0 0.09374          | AAAATATTCTACCACAACATTGCCATTGTAGTTACAATTGGCACAAATC     |
| plasmid_cp26   | 25710 | BB_B29 | <b>0.169</b> ± 0.1767 0.118183 | <b>0.37</b> ± 0.3309 0.16111  | <b>8.593</b> ± 7.1636 0.08328 | <b>0.088</b> ± 0.1076 0.11143 | CAGTATTGGGATCTGCAAGTTGTTGAAAAATATATTTGTGCTCCTGAGA     |
| plasmid_cp26   | 25713 | BB_B29 | <b>0.058</b> ± 0.0707 0.13663  | <b>0.291</b> ± 0.3996 0.089   | <b>3.187</b> ± 2.9396 0.07109 | <b>0.091</b> ± 0.0817 0.14797 | CACTTTGAAGTTGCAAAAGGAACAAGATTTTTAGCGGGGAATTTGTTGTT    |
| plasmid_cp26   | 25928 | BB_B29 | <b>0.053</b> ± 0.039 0.102985  | <b>0.272</b> ± 0.3451 0.26042 | <b>1.763</b> ± 1.1553 0.26948 | <b>0.166</b> ± 0.125 0.13631  | AAGTGTGTTGCTGCAAAAAGGAATGCAAAATCAAGAGGCTCTGTAATCC     |
| plasmid_cp26   | 25931 | BB_B29 | <b>0.104</b> ± 0.0577 0.02486  | <b>0.386</b> ± 0.3862 0.03066 | <b>2.64</b> ± 1.0173 0.02771  | <b>0.145</b> ± 0.0943 0.01584 | ATAAAGTGTGTTGCTGCAAAAAGGAATGCAAAATCAAGAGGCTCTGTAAT    |
| plasmid_cp26   | 25940 | BB_B29 | <b>0.121</b> ± 0.1943 0.136654 | <b>0.445</b> ± 0.4386 0.43409 | <b>2.497</b> ± 2.4325 0.14073 | <b>0.082</b> ± 0.0981 0.20552 | TATAAAGTAATAAAGTGTGTTGCTGCAAAAAGGAATGCAAAATCAAGAGG    |
| plasmid_cp26   | 25943 | BB_B29 | <b>0.108</b> ± 0.1242 0.091359 | <b>0.718</b> ± 1.032 0.27705  | <b>3.017</b> ± 2.1193 0.02018 | <b>0.217</b> ± 0.168 0.1136   | TGTTCTCTTTTGGACTAGCATATCTTTAACACACCTTTTAAACGTAGG      |
| plasmid_cp26   | 25959 | BB_B29 | <b>0.274</b> ± 0.4673 0.149827 | <b>0.306</b> ± 0.5301 0.14589 | <b>1.148</b> ± 0.9207 0.79091 | <b>0.057</b> ± 0.059 0.00163  | GTCCAAAAAGAGGAACATATAAAGTAATAAAGTGTGTTGCTGCAAAAA      |
| plasmid_cp26   | 25992 | BB_B29 | <b>0.008</b> ± 0.0137 0.079907 | <b>0.179</b> ± 0.3243 0.11659 | <b>3.288</b> ± 3.3998 0.2404  | <b>0.099</b> ± 0.1691 0.0894  | GGAGTTGGACTAACATTTTCTGGCGGATTTATAGATGATTTCTCTAATTTGA  |
| plasmid_cp26   | 26025 | BB_B29 | <b>0.065</b> ± 0.0906 0.172219 | <b>0.525</b> ± 0.8814 0.00873 | <b>2.104</b> ± 2.4275 0.14793 | <b>0.145</b> ± 0.1758 0.18493 | GATATGTTCTATTTGGAATACTTCAGGGAAATAGCAAAAACAATTTGGATA   |
| plasmid_cp26   | 26026 | BB_B29 | <b>0.047</b> ± 0.0438 0.10615  | <b>0.364</b> ± 0.472 0.30276  | <b>2.629</b> ± 1.8578 0.17115 | <b>0.136</b> ± 0.1295 0.11    | TCTATAAATCCCGCAGAAATGTTAGTCCAACCTCCTACGTTTAAAGGTGT    |
| plasmid_cp26   | 26099 | BB_B29 | <b>0.000</b> ± 0 0.0302        | <b>1.391</b> ± 1.5674 0.66566 | <b>5.269</b> ± 3.3401 0.10539 | <b>0.267</b> ± 0.3341 0.10914 | GAAATTTCCCAAGATAGGAATTGCTATCCAATTTGTTTTGCTATTTCCCTG   |
| plasmid_cp26   | 26464 | IG_128 | <b>0.389</b> ± 0.5822 0.476658 | <b>0.055</b> ± 0.0834 0.15428 | <b>1.012</b> ± 1.6049 0.98387 | <b>0.432</b> ± 0.4941 0.38868 | TTTTAAAAATTTTACATAAGCTTGTGCTGATTTTCTTTTATATTATTCGGAC  |
| plasmid_cp32-1 | 96    | BB_P01 | <b>2.280</b> ± 1.0036 0.047613 | <b>1.536</b> ± 1.2742 0.4247  | <b>1.016</b> ± 0.3476 0.79076 | <b>1.071</b> ± 0.4785 0.49702 | GATAAAAATAAGTTCACTAGAACATACAAAATCACTCAATATTTTTAGAAAT  |
| plasmid_cp32-1 | 274   | BB_P01 | <b>1.030</b> ± 0.8162 0.919729 | <b>0.826</b> ± 0.9591 0.83058 | <b>1.591</b> ± 1.3985 0.54105 | <b>0.87</b> ± 0.8061 0.76931  | ATACAATTAAGCAGAGCATTCTTAAGCTGTACCTTTAACCTAGCAAGTTCA   |
| plasmid_cp32-1 | 279   | BB_P01 | <b>1.713</b> ± 0.5685 0.105948 | <b>1.629</b> ± 1.2968 0.44654 | <b>0.82</b> ± 0.2575 0.11005  | <b>1.103</b> ± 0.3494 0.50466 | AGCTACCGTTTTTCATGGGATTTGGCTATGTTTTAGTAAAAACCAAAGATACC |
| plasmid_cp32-1 | 333   | BB_P01 | <b>2.978</b> ± 1.5031 0.082068 | <b>1.151</b> ± 1.045 0.83713  | <b>0.592</b> ± 0.5186 0.51499 | <b>0.71</b> ± 0.601 0.6271    | ATAGATCTCGAACACCCGTTAATATAGAATTACCTATTGTTTTGAATAC     |
| plasmid_cp32-1 | 395   | BB_P01 | <b>1.782</b> ± 0.2913 0.004012 | <b>1.406</b> ± 0.7207 0.41429 | <b>1.071</b> ± 0.1627 0.17033 | <b>0.959</b> ± 0.1696 0.60805 | TTCAATCAAGGTATTCAAACCAATAGGTAATTCTATATTAACGGGTTG      |

|                |      |        |                         |                        |                        |                        |                                                       |
|----------------|------|--------|-------------------------|------------------------|------------------------|------------------------|-------------------------------------------------------|
| plasmid_cp32-1 | 398  | BB_P01 | 1.526 ± 0.4147 0.05796  | 1.313 ± 0.6857 0.44545 | 0.596 ± 0.2163 0.00216 | 0.818 ± 0.1893 0.23134 | TGTAAGAGATTTGGGAGTTGATTTTATCATATAACCTATAAAGTAAAATC    |
| plasmid_cp32-1 | 399  | BB_P01 | 1.238 ± 0.359 0.408874  | 0.585 ± 0.4386 0.16135 | 1.091 ± 0.2928 0.66889 | 1.177 ± 0.3496 0.48854 | CATATTCATAATCAAGGTTATCAAAACCAATAGGTAATCTATATTAACGG    |
| plasmid_cp32-1 | 444  | BB_P01 | 1.517 ± 1 0.523457      | 1.365 ± 0.3748 0.22168 | 1.09 ± 0.5114 0.82492  | 0.775 ± 0.2457 0.39059 | AAATCCAACAATAAGAACAATCTTTAGACGCAGTTAAAATACATAAAAAGT   |
| plasmid_cp32-1 | 478  | BB_P01 | 1.495 ± 1.2194 0.417015 | 0.999 ± 0.9196 0.99941 | 0.597 ± 0.357 0.31678  | 1.219 ± 0.5412 0.48404 | ACTCGCTTAAAGAATTGTCTTATGTTGGATTTGATTTACAGTATA         |
| plasmid_cp32-1 | 490  | BB_P01 | 2.403 ± 0.8146 0.104048 | 1.647 ± 2.3284 0.68214 | 0.366 ± 0.3279 0.11693 | 1.106 ± 0.6609 0.84142 | AAAGTCGACTTATCATATATGAAAACCTTTGATTATATCTTAAAAAGATATG  |
| plasmid_cp32-1 | 504  | BB_P01 | 0.445 ± 0.3457 0.188967 | 0.277 ± 0.2506 0.12525 | 0.716 ± 0.5081 0.44098 | 0.412 ± 0.4138 0.33019 | TGATAAGTCGACTTTTATGATTTTAACTCGCTCTAAAGAATTGTCTTAT     |
| plasmid_cp32-1 | 506  | BB_P01 | 3.577 ± 2.4429 0.016664 | 2.251 ± 2.7763 0.36116 | 1.056 ± 0.6522 0.90794 | 1.314 ± 1.0436 0.01826 | TATGATAAGTCGACTTTTATGATTTTAACTCGCTCTAAAGAATTGTCTT     |
| plasmid_cp32-1 | 507  | BB_P01 | 1.659 ± 1.3457 0.229008 | 1.33 ± 1.2077 0.24226  | 1.215 ± 0.9585 0.54762 | 1.36 ± 1.2115 0.46203  | TATGAAAACCTTTGATTATATCTTAAAAAGATATGTTCCGTTTATACGGAA   |
| plasmid_cp32-1 | 521  | BB_P01 | 2.113 ± 0.8427 0.048969 | 1.214 ± 0.6985 0.71823 | 1.001 ± 0.4037 0.99531 | 1.196 ± 0.5158 0.53981 | ATCAAAGTTTTTATATATGATAAGTCGACTTTTATGATTTTAACTCGCTC    |
| plasmid_cp32-1 | 524  | BB_P01 | 1.957 ± 0.5097 0.027066 | 1.041 ± 0.7545 0.92281 | 1.14 ± 0.2148 0.31921  | 1.548 ± 1.0529 0.44309 | TATCTTAAAAAGATATGTTCCGTTTATACGGAAAGCTTTTACTAGATAT     |
| plasmid_cp32-1 | 526  | BB_P01 | 1.058 ± 0.7696 0.764083 | 0.096 ± 0.1041 0.16641 | 0.743 ± 1.2024 0.43473 | 1.626 ± 1.5848 0.30218 | TCTTAAAAAGATATGTTCCGTTTATACGGAAAGCTTTTACTAGATAT       |
| plasmid_cp32-1 | 578  | BB_P01 | 2.146 ± 1.4406 0.186939 | 2.394 ± 2.1106 0.29176 | 0.86 ± 0.4398 0.60232  | 1.4 ± 0.6696 0.28969   | TTTATTTGAAAAGATATACGTAGAAATAGAAAAGCATTGAAAACCCACAA    |
| plasmid_cp32-1 | 744  | BB_P01 | 1.860 ± 0.7445 0.168438 | 1.979 ± 1.5429 0.37461 | 0.979 ± 0.1539 0.86885 | 1.054 ± 1.0305 0.2138  | TCTCTTTTTTGGAAAACAAAATTCAAACAATCATAGTAAAGATATTTCT     |
| plasmid_cp32-1 | 1039 | BB_P01 | 1.097 ± 0.6946 0.793925 | 1.092 ± 0.6683 0.85886 | 0.319 ± 0.2202 0.16236 | 0.389 ± 0.4203 0.24513 | TCACCTTTACCATCTTCTAGTCCTTTAGCCTGCTCATTAAAACCTCTG      |
| plasmid_cp32-1 | 1042 | BB_P01 | 3.679 ± 2.2079 0.038148 | 2.525 ± 3.6892 0.45691 | 1.072 ± 0.5944 0.82227 | 0.932 ± 0.6191 0.88805 | GGAGTAATTATACGATTTTCTCAAAGGTGTACAAGAACAGTTGAGAAGT     |
| plasmid_cp32-1 | 1214 | BB_P01 | 1.808 ± 1.3941 0.116166 | 1.998 ± 2.5137 0.33369 | 1.166 ± 1.171 0.18317  | 1.065 ± 1.1122 0.75102 | TAACCAGCTTATACAAAGTAGCTCATTTAATAATAGGAGCTAGCGATGTT    |
| plasmid_cp32-1 | 1626 | BB_P02 | 2.309 ± 1.5952 0.304761 | 1.039 ± 0.687 0.89964  | 0.613 ± 0.2268 0.24071 | 0.868 ± 1.2903 0.89712 | TCCTTTTGAAGTACCACTCTTTGTTAAATGATTGCTAAGATGTGCTTT      |
| plasmid_cp32-1 | 1631 | BB_P02 | 0.998 ± 1.2008 0.999189 | 0.997 ± 1.0413 0.99174 | 0.905 ± 0.9905 0.91786 | 1.047 ± 0.9052 0.48162 | CATTTAAAGACATTTATGCAAGCACCAACTGAGAGAACTTTGACGCAAGTTCG |
| plasmid_cp32-1 | 1747 | BB_P02 | 1.257 ± 0.5877 0.292939 | 0.296 ± 0.2226 0.10262 | 0.843 ± 0.683 0.61     | 1.059 ± 0.5219 0.78167 | TTAGAGCAACTGTTTCTTTAGCAAAAGTGAATATTAATAAAGAAAAAT      |
| plasmid_cp32-1 | 1928 | BB_P02 | 1.344 ± 0.6553 0.46496  | 1.296 ± 0.2656 0.17421 | 0.752 ± 0.3421 0.38505 | 0.657 ± 0.4883 0.43764 | TTACTTATCGCTTGTACAAATCTGTGAAATTAATAGGTACAAAATTAGAA    |
| plasmid_cp32-1 | 1931 | BB_P02 | 2.538 ± 1.7838 0.060833 | 1.621 ± 1.4582 0.22343 | 1.428 ± 0.8359 0.13292 | 1.06 ± 0.6865 0.68722  | CATACAAGCAAGACGAATCAATTTTATGAAAATCTAAAAGACATAAAA      |
| plasmid_cp32-1 | 2216 | BB_P03 | 1.713 ± 0.9633 0.28183  | 1.165 ± 0.8508 0.77659 | 0.843 ± 0.5357 0.61491 | 0.857 ± 0.499 0.48262  | TACGGATACCTTTAGCAGGGTAATCTTATTTTGTCTTTACTGTAGTG       |
| plasmid_cp32-1 | 2231 | BB_P03 | 1.700 ± 1.2548 0.307871 | 1.886 ± 1.2005 0.20887 | 1.427 ± 0.9376 0.42509 | 1.373 ± 0.4671 0.29505 | AGCTTAGTTTTGGAGATGGAACAACCCGAAGTGAAGTTGAGGCTGGTGGTG   |
| plasmid_cp32-1 | 2341 | BB_P03 | 1.972 ± 0.8316 0.1902   | 1.41 ± 0.8776 0.51964  | 0.94 ± 0.4884 0.85649  | 0.913 ± 0.2061 0.53406 | TAACAGTTGCATACCGCTAAACTCATCTATATCGGAAACCACTCCATATA    |
| plasmid_cp32-1 | 2698 | BB_P04 | 0.365 ± 0.3425 0.27761  | 0.316 ± 0.5496 0.3361  | 0.635 ± 0.375 0.12358  | 0.418 ± 0.4649 0.09502 | CGTCCTCAGCTTGTCTTGTCTTCCGTTTACTGCTTAGGAGCAGCGGAAACTT  |
| plasmid_cp32-1 | 2993 | BB_P04 | 0.982 ± 0.6553 0.935165 | 0.734 ± 0.6667 0.70331 | 1.227 ± 0.8127 0.31245 | 1.336 ± 1.0152 0.04237 | TCAGTATCAGCTCAAACCTCAACATATATAGAGTCTCTTTTGGAAACTT     |
| plasmid_cp32-1 | 3004 | BB_P04 | 2.468 ± 1.4539 0.109376 | 1.374 ± 1.4693 0.64434 | 0.746 ± 0.447 0.14365  | 1.026 ± 0.7426 0.96198 | TCCCATACATATCAGTATCAGCTCAAACCTCAACATATATAGAGTCTCTT    |
| plasmid_cp32-1 | 3124 | BB_P04 | 0.062 ± 0.0884 0.158757 | 0.308 ± 0.5173 0.14059 | 1.414 ± 1.4419 0.57193 | 0.241 ± 0.2909 0.16205 | AATAAACAAGGTTATTATCAAGCCGGAGGTGGGCCACCAACCGCAATT      |
| plasmid_cp32-1 | 3203 | BB_P04 | 1.863 ± 0.7859 0.042691 | 1.757 ± 1.2708 0.28274 | 1.002 ± 0.4646 0.9856  | 1.435 ± 0.47 0.07818   | CAATCAATTTTGACCCGGAAGATGGAAATCAAGATCAAAATAGATATCCTA   |
| plasmid_cp32-1 | 3249 | BB_P04 | 0.132 ± 0.2143 0.191155 | 0.342 ± 0.5405 0.33251 | 0.179 ± 0.1905 0.20708 | 0.411 ± 0.5974 0.41779 | TCCTAGGCAAGAGTATTCTATTAATTTGATAAAAGTTGCAATTTTTGGAAA   |
| plasmid_cp32-1 | 3376 | BB_P05 | 3.449 ± 2.3648 0.054092 | 2.037 ± 1.7995 0.19953 | 1.146 ± 0.861 0.42411  | 1.138 ± 0.8326 0.51796 | TCTCCCATTTTACTCCTTTTTTTCGCCCAAAGTTTAAACCCATTCAG       |
| plasmid_cp32-1 | 3393 | BB_P05 | 2.624 ± 2.4954 0.358798 | 2.291 ± 2.6999 0.35442 | 1.689 ± 0.9845 0.11162 | 1.741 ± 1.2449 0.38865 | AAAGAGTATCAAGAGAAAAGAAGTAAACTGGAAGAAATTTATGAAAAATCCC  |
| plasmid_cp32-1 | 3668 | BB_P05 | 1.996 ± 1.9308 0.358105 | 1.772 ± 2.3338 0.52477 | 0.737 ± 0.4721 0.59403 | 1.275 ± 0.8162 0.66196 | TGGAATATGCATTGACATAGATGAGTTTATGTAACAGCTACTATTGTGCC    |
| plasmid_cp32-1 | 3694 | BB_P05 | 2.062 ± 0.6931 0.105575 | 2.249 ± 1.9007 0.35902 | 1.052 ± 0.3335 0.66848 | 1.457 ± 0.6698 0.13253 | AACTCATCTATGTCAATGCATATCCCATATAAGTCTCACCTCCACCAGCC    |
| plasmid_cp32-1 | 3727 | BB_P05 | 2.266 ± 1.2985 0.210641 | 1.586 ± 1.3554 0.58415 | 1.2 ± 0.9847 0.8075    | 1.192 ± 0.5802 0.43585 | TTGGTAATGGCACAATAGTAGCTTTTACTAACTCATCTATGTCAATG       |
| plasmid_cp32-1 | 3796 | BB_P05 | 1.586 ± 0.9333 0.144643 | 1.804 ± 1.4676 0.14477 | 0.944 ± 0.6347 0.82814 | 1.387 ± 1.0446 0.23281 | AAGACGGTGTCTTTGAAAAGGTGACTGGAGCACCAGCTTAAAGCTATTA     |
| plasmid_cp32-1 | 4067 | BB_P06 | 1.604 ± 0.7149 0.20649  | 0.901 ± 0.2527 0.31777 | 0.784 ± 0.1548 0.20858 | 0.894 ± 0.139 0.42489  | AGATGTTGATCTACAATGGGATATCAAAAAACCGTAAAAAGGGACGCGTT    |
| plasmid_cp32-1 | 4222 | BB_P06 | 2.510 ± 1.3467 0.127714 | 2.37 ± 2.1543 0.34611  | 0.83 ± 0.4248 0.31537  | 1.09 ± 0.5759 0.60426  | AATTCAGACATTTAAGCAGACTCTGAGAAAATTTTATACTTCAGATTAT     |
| plasmid_cp32-1 | 4489 | BB_P06 | 2.184 ± 1.7254 0.213156 | 1.841 ± 2.3711 0.51663 | 0.734 ± 0.5448 0.1453  | 1.088 ± 0.528 0.57479  | AAATGGATAAAATCTTTGAAAAGATTGAGGCTGGACTTTCAAAGTTAGAAC   |
| plasmid_cp32-1 | 4678 | BB_P06 | 1.973 ± 1.4602 0.178762 | 0.348 ± 0.2792 0.19596 | 0.35 ± 0.2098 0.10774  | 0.833 ± 0.6643 0.0713  | AGGCTATAATAATAGAGAAGATTGTTTACTTGAACACTCAAACCTCTGTA    |
| plasmid_cp32-1 | 4789 | BB_P06 | 2.161 ± 0.8913 0.126112 | 1.268 ± 0.7014 0.61265 | 0.915 ± 0.3866 0.81054 | 0.985 ± 0.3889 0.92663 | TACTTGTAGTTTTAAAATTTAATAAGTTCAGAATTTAGTGATAAATGAGT    |
| plasmid_cp32-1 | 5093 | BB_P07 | 1.440 ± 0.3179 0.163951 | 1.375 ± 1.6638 0.74041 | 0.898 ± 0.5507 0.79338 | 0.869 ± 0.3613 0.6106  | GCTTGAAGTAAAGATAAATGAAGTAGAAAATTTGCCTGCTTAGTGAAT      |
| plasmid_cp32-1 | 5259 | BB_P07 | 1.370 ± 0.9894 0.603427 | 1.806 ± 1.5328 0.33807 | 0.698 ± 0.3871 0.45124 | 0.952 ± 0.6738 0.94017 | TTATCTAGTAGCAGTGGAGGCGAAGAAGCGCGAGGGAGTTGTGGCTC       |
| plasmid_cp32-1 | 5566 | BB_P08 | 1.647 ± 0.6918 0.085502 | 1.634 ± 1.642 0.50049  | 0.798 ± 0.2566 0.16205 | 1.095 ± 0.5414 0.60156 | TTATTGACATAAAGCCACAAGAAGTTCGAATCTTTGATTTGATGATGAT     |
| plasmid_cp32-1 | 5633 | BB_P08 | 0.430 ± 1.198 0.118765  | 0.424 ± 0.3851 0.22071 | 1.184 ± 0.4085 0.05578 | 1.043 ± 0.3976 0.51287 | TTCCAACTTTACACATATCAAGACCTTAACTATGAACCAAAAGACCGAAT    |
| plasmid_cp32-1 | 5648 | BB_P08 | 3.692 ± 2.2784 0.105271 | 0.762 ± 0.5292 0.30066 | 1.065 ± 0.5731 0.72684 | 1.192 ± 0.7544 0.71266 | TGTTGAAAGTTTGAATATCCTTGAATATCAGACATATCAGAATCATAAAG    |
| plasmid_cp32-1 | 5917 | BB_P09 | 2.650 ± 0.8984 0.044053 | 1.404 ± 0.7464 0.4008  | 0.98 ± 0.2619 0.83855  | 1.106 ± 0.2647 0.47206 | TATCAATAATAGCTATATAAATCTAAGTTTAACTTGGACCTAAATCGGG     |
| plasmid_cp32-1 | 5928 | BB_P09 | 2.463 ± 2.0326 0.199416 | 1.986 ± 2.115 0.37913  | 1.084 ± 0.6761 0.69229 | 2.174 ± 1.4272 0.18354 | GCTATATAAATCTAAGTTTAACTTGCACCTAAATCGGGAATGGAGGCTA     |
| plasmid_cp32-1 | 6014 | BB_P09 | 2.603 ± 1.2648 0.062078 | 1.668 ± 1.1689 0.27608 | 0.994 ± 0.3353 0.94769 | 1.291 ± 0.5233 0.15445 | GATAATTTTATAGATATCTTAAAAAGCTTTGCAATAGCTCCATTCGGC      |







































































































|                |       |        |                                |                               |                               |                               |                                                     |
|----------------|-------|--------|--------------------------------|-------------------------------|-------------------------------|-------------------------------|-----------------------------------------------------|
| plasmid_lp28-1 | 19736 | BB_F32 | <b>0.522</b> ± 0.251 0.153736  | <b>0.53</b> ± 0.4029 0.36946  | <b>0.822</b> ± 0.4023 0.4381  | <b>0.951</b> ± 0.4593 0.89012 | ATATCTGCTCCCACTAACAGCACTAACAGCACCAGCCGCTTGCTAGCAG   |
| plasmid_lp28-1 | 19739 | BB_F32 | <b>0.459</b> ± 0.6335 0.290048 | <b>2.067</b> ± 2.4868 0.53787 | <b>0.906</b> ± 0.4233 0.74102 | <b>0.362</b> ± 0.123 0.03137  | TCTGCTCCCACTAACAGCACTAACAGCACCAGCCGCTTGCTAGCAGCCT   |
| plasmid_lp28-1 | 19921 | BB_F32 | <b>1.075</b> ± 0.4673 0.442647 | <b>1.619</b> ± 1.1951 0.33501 | <b>0.811</b> ± 0.3102 0.07104 | <b>1.06</b> ± 0.551 0.79269   | AGGGGATAAAGGAGATTGTTGAAGCTGCTGGGGGAGTGAAAAGCTGAAAG  |
| plasmid_lp28-1 | 20151 | BB_F32 | <b>0.669</b> ± 0.3609 0.170354 | <b>0.599</b> ± 0.5158 0.51885 | <b>0.966</b> ± 0.5105 0.80365 | <b>1.126</b> ± 0.75 0.42402   | TGCTTTGAGGGGGATGGCTAAAGCTGGAAGTTGCTGTGAAGATGGTG     |
| plasmid_lp28-1 | 20320 | BB_F32 | <b>0.403</b> ± 0.4416 0.471404 | <b>1.079</b> ± 1.2706 0.84292 | <b>0.194</b> ± 0.2346 0.27732 | <b>0.819</b> ± 0.9195 0.76191 | TCTGCTCCCACTAACAGCACCAGCCGCTTGCTAGCAGCCTACTGTCCC    |
| plasmid_lp28-1 | 20493 | BB_F32 | <b>0.718</b> ± 0.3277 0.44104  | <b>1.802</b> ± 1.7542 0.53136 | <b>0.594</b> ± 0.4902 0.03596 | <b>0.829</b> ± 0.5615 0.75777 | AGGGGATAAAGGAGATTGTTGAAGCTGCTGGGGGAGTAAAAGCTGAAAG   |
| plasmid_lp28-1 | 20646 | BB_F32 | <b>1.017</b> ± 0.569 0.95009   | <b>1.877</b> ± 1.3576 0.2403  | <b>0.887</b> ± 0.4624 0.26437 | <b>1.056</b> ± 0.4335 0.82174 | GCCCCCTCAGCCTTCCCTTTCTCATTATTATCCTTCTCACAGCAAACTTT  |
| plasmid_lp28-1 | 20724 | BB_F32 | <b>0.621</b> ± 0.4753 0.145374 | <b>0.619</b> ± 0.326 0.34022  | <b>0.867</b> ± 0.3457 0.00953 | <b>0.981</b> ± 0.4105 0.94044 | TTGCTTTGAGGGGGATGGCTAAAGCTGGAAGTTGCTGTGAAGAGGATA    |
| plasmid_lp28-1 | 20881 | BB_F32 | <b>0.543</b> ± 0.1952 0.07919  | <b>0.5</b> ± 0.2676 0.18373   | <b>0.794</b> ± 0.3316 0.15428 | <b>1.208</b> ± 0.3548 0.42848 | ATATCTGCTCCCACTAACAGCACTAACAGCACCAGCCGCTTGCTAGCAG   |
| plasmid_lp28-1 | 20884 | BB_F32 | <b>0.350</b> ± 0.4849 0.271329 | <b>1.648</b> ± 2.0999 0.64768 | <b>0.667</b> ± 0.3152 0.16132 | <b>0.318</b> ± 0.2296 0.03107 | TCTGCTCCCACTAACAGCACTAACAGCACCAGCCGCTTGCTAGCAGCCT   |
| plasmid_lp28-1 | 21066 | BB_F32 | <b>1.040</b> ± 0.4953 0.712339 | <b>1.575</b> ± 1.203 0.37453  | <b>0.781</b> ± 0.2981 0.04074 | <b>1.022</b> ± 0.5821 0.92671 | AGGGGATAAAGGAGATTGTTGAAGCTGCTGGGGGAGTAAAAGCTGAAAG   |
| plasmid_lp28-1 | 21111 | BB_F32 | <b>1.229</b> ± 1.28 0.752348   | <b>1.321</b> ± 0.9818 0.61004 | <b>0.584</b> ± 0.6567 0.27213 | <b>0.863</b> ± 0.4685 0.36045 | TCAGCCACAACCTTCCAATTGCATCAGTACCACCTTGAAGCCCCCTCAGCT |
| plasmid_lp28-1 | 21288 | BB_F32 | <b>0.690</b> ± 0.4382 0.187418 | <b>0.641</b> ± 0.3973 0.44318 | <b>0.828</b> ± 0.4298 0.08837 | <b>0.909</b> ± 0.3642 0.74366 | TTGCTTTGAGGGGGATGGCTAAAGCTGGAAGTTTGCTGTGAAGAATGATG  |
| plasmid_lp28-1 | 21654 | BB_F32 | <b>0.637</b> ± 0.2926 0.325471 | <b>1.716</b> ± 1.7239 0.57968 | <b>0.56</b> ± 0.4195 0.06532  | <b>0.874</b> ± 0.5463 0.81479 | AGGGGATAAAGGAGATTGTTGAAGCTGCTGGGGGAGTAAAAGCTGAAAG   |
| plasmid_lp28-1 | 21777 | BB_F32 | <b>0.334</b> ± 0.3116 0.168743 | <b>0.705</b> ± 0.5813 0.64281 | <b>1.321</b> ± 0.6298 0.27015 | <b>0.831</b> ± 0.6394 0.77128 | AGCTGGTAAAAGCTGTAAGAGCAGCTGAGGGGGCTCAAGCGGTACTGATG  |
| plasmid_lp28-1 | 21885 | BB_F32 | <b>0.749</b> ± 0.439 0.161768  | <b>0.716</b> ± 0.4094 0.54455 | <b>0.893</b> ± 0.4062 0.34385 | <b>1.011</b> ± 0.5098 0.96682 | TTGCTTTGAGGGGGATGGCTAAAGCTGGAAGTTTGCTGTGAAGAGTAAAG  |
| plasmid_lp28-1 | 22045 | BB_F32 | <b>0.489</b> ± 0.2507 0.089035 | <b>0.65</b> ± 0.5401 0.17373  | <b>1.08</b> ± 0.6574 0.29603  | <b>1.247</b> ± 0.6583 0.88872 | ATATCTGCTCCCACTAACAGCACTAACAGCACCAGCCGCTTGCTAGCAG   |
| plasmid_lp28-1 | 22045 | BB_F32 | <b>0.451</b> ± 0.2481 0.253028 | <b>0.414</b> ± 0.2326 0.57562 | <b>0.698</b> ± 0.3131 0.46731 | <b>0.958</b> ± 0.3984 0.24227 | TAAAGTGCATTGTTACGGCTCGGCTGCTGGTGAGCAGGATGGAGAGAAAG  |
| plasmid_lp28-1 | 22048 | BB_F32 | <b>0.496</b> ± 0.6556 0.26912  | <b>1.573</b> ± 1.707 0.58927  | <b>0.663</b> ± 0.2781 0.17569 | <b>0.358</b> ± 0.2264 0.04648 | TCTGCTCCCACTAACAGCACTAACAGCACCAGCCGCTTGCTAGCAGCCT   |
| plasmid_lp28-1 | 22233 | BB_F32 | <b>1.087</b> ± 0.4666 0.390364 | <b>1.63</b> ± 1.2311 0.35811  | <b>0.812</b> ± 0.3066 0.08784 | <b>1.066</b> ± 0.567 0.75411  | AGGGGATAAAGGAGATTGTTGAAGCTGCTGGGGGAGTAAAAGCTGAAAG   |
| plasmid_lp28-1 | 22392 | BB_F32 | <b>0.600</b> ± 0.3352 0.108704 | <b>0.717</b> ± 0.3571 0.4901  | <b>0.911</b> ± 0.4716 0.32719 | <b>1.031</b> ± 0.3865 0.84441 | TTGCTTTGAGGGGGATGGCTAAAGCTGGAAGTTTGCTGTGAAGGGTAATA  |
| plasmid_lp28-1 | 22546 | BB_F32 | <b>0.612</b> ± 0.1862 0.186657 | <b>0.512</b> ± 0.2067 0.11952 | <b>0.943</b> ± 0.2385 0.78741 | <b>1.296</b> ± 0.3781 0.20088 | ATATCTGCTCCCACTAACAGCACTAACAGCACCAGCCGCTTGCTAGCAG   |
| plasmid_lp28-1 | 22549 | BB_F32 | <b>0.451</b> ± 0.5366 0.14318  | <b>2.281</b> ± 2.7673 0.49025 | <b>0.867</b> ± 0.3416 0.6303  | <b>0.504</b> ± 0.532 0.33139  | TCTGCTCCCACTAACAGCACTAACAGCACCAGCCGCTTGCTAGCAGCCT   |
| plasmid_lp28-1 | 22728 | BB_F32 | <b>1.180</b> ± 0.6543 0.743607 | <b>1.67</b> ± 1.1581 0.4617   | <b>0.607</b> ± 0.2557 0.13014 | <b>0.885</b> ± 0.4368 0.76911 | AGGGGATAAAGGAGATTGTTGAAGCTGCTAGGGGAGTAAAAGCTGAAAG   |
| plasmid_lp28-1 | 22950 | BB_F32 | <b>0.650</b> ± 0.3952 0.238096 | <b>0.787</b> ± 0.4778 0.66777 | <b>0.881</b> ± 0.4279 0.32157 | <b>1.091</b> ± 0.4635 0.72238 | TTGCTTTGAGGGGGATGGCTAAAGCTGGAAGTTTGCTGTGAAGGGTAATA  |
| plasmid_lp28-1 | 23110 | BB_F32 | <b>0.534</b> ± 0.1701 0.127081 | <b>0.47</b> ± 0.3185 0.19665  | <b>0.632</b> ± 0.2041 0.20708 | <b>0.978</b> ± 0.3677 0.94701 | ATATCTGCTCCCACTAACAGCACTAACAGCACCAGCCGCTTGCTAGCAG   |
| plasmid_lp28-1 | 23113 | BB_F32 | <b>0.357</b> ± 0.4036 0.187026 | <b>1.866</b> ± 2.0503 0.56082 | <b>0.741</b> ± 0.3421 0.32615 | <b>0.441</b> ± 0.2513 0.00773 | TCTGCTCCCACTAACAGCACTAACAGCACCAGCCGCTTGCTAGCAGCCT   |
| plasmid_lp28-1 | 23292 | BB_F32 | <b>1.085</b> ± 0.4753 0.358957 | <b>1.627</b> ± 1.2084 0.32087 | <b>0.775</b> ± 0.3113 0.11957 | <b>1.086</b> ± 0.6215 0.72793 | AGGGGATAAAGGAGATTGTTGAAGCTGCTGGGGGAGTAAAAGCTGAAAG   |
| plasmid_lp28-1 | 23454 | BB_F32 | <b>0.648</b> ± 0.4884 0.200612 | <b>0.707</b> ± 0.4532 0.5683  | <b>0.883</b> ± 0.5044 0.09467 | <b>1.002</b> ± 0.5085 0.99571 | TTGCTTTGAGGGGGATGGCTAAAGCTGGAAGTTTGCTGTGAAGAATGATG  |
| plasmid_lp28-1 | 23617 | BB_F32 | <b>0.740</b> ± 0.313 0.204226  | <b>0.595</b> ± 0.4769 0.44924 | <b>0.847</b> ± 0.4161 0.24691 | <b>1.053</b> ± 0.4096 0.78914 | ATATCTGCTCCCACTAACAGCACTAACAGCACCAGCTGCCTTGCTAGCAG  |
| plasmid_lp28-1 | 23709 | BB_F32 | <b>0.842</b> ± 0.359 0.565927  | <b>1.93</b> ± 1.135 0.28428   | <b>1.003</b> ± 0.7415 0.99317 | <b>1.279</b> ± 0.9162 0.67447 | AGGGGATAAAGGAGATTGTTGAAGCTGCTGGGGACAGTAGGGCTGCTAGCA |
| plasmid_lp28-1 | 23826 | BB_F32 | <b>0.764</b> ± 0.2833 0.158863 | <b>1.132</b> ± 0.6449 0.73048 | <b>1.351</b> ± 0.5239 0.30454 | <b>1.127</b> ± 0.5126 0.55195 | AGCTGGTAAAAGCTGTAAGAGCAGCTGAGGGGGCTCAAGTGGTACTGCTG  |
| plasmid_lp28-1 | 23931 | BB_F32 | <b>1.354</b> ± 0.9767 0.428785 | <b>2.963</b> ± 3.1849 0.32188 | <b>1.12</b> ± 0.7662 0.59057  | <b>1.626</b> ± 1.018 0.43293  | TTGCTTTGAGGGGGATGGCTAAAGCTGGAAGTTTGCTGTGAAGGATGGTG  |
| plasmid_lp28-1 | 24396 | BB_F32 | <b>0.794</b> ± 0.2936 0.229714 | <b>1.148</b> ± 0.6591 0.70599 | <b>1.366</b> ± 0.5568 0.32861 | <b>1.142</b> ± 0.5027 0.49493 | AGCTGGTAAAAGCTGTAAGAGCAGCTGAGGGGGCTCAAGTGGTACTGCTG  |
| plasmid_lp28-1 | 24498 | BB_F32 | <b>0.617</b> ± 0.3894 0.13029  | <b>0.633</b> ± 0.3836 0.41468 | <b>0.833</b> ± 0.3292 0.0449  | <b>0.889</b> ± 0.3976 0.73437 | TTGCTTTGAGGGGGATGGCTAAAGCTGGAAGTTTGCTGTGAAGAAGGATG  |
| plasmid_lp28-1 | 24664 | BB_F32 | <b>0.523</b> ± 0.1898 0.081801 | <b>0.38</b> ± 0.3013 0.14581  | <b>0.763</b> ± 0.2616 0.39062 | <b>1.018</b> ± 0.4411 0.96512 | ATATCTGCTCCCACTAACAGCACTAACAGCACCAGCCGCTTGCTAGCAG   |
| plasmid_lp28-1 | 24667 | BB_F32 | <b>0.500</b> ± 0.6003 0.348994 | <b>1.942</b> ± 2.4192 0.57758 | <b>0.669</b> ± 0.2623 0.18569 | <b>0.427</b> ± 0.2672 0.18535 | TCTGCTCCCACTAACAGCACTAACAGCACCAGCCGCTTGCTAGCAGCCT   |
| plasmid_lp28-1 | 24771 | BB_F32 | <b>0.169</b> ± 0.2399 0.080397 | <b>0.691</b> ± 0.6916 0.1226  | <b>0.659</b> ± 0.9015 0.50615 | <b>1.288</b> ± 0.8182 0.41603 | AAGAGGCAGGGAAGTTGTTGGGAAGGCTGGTGCTGATGCTAATGGGGACA  |
| plasmid_lp28-1 | 24849 | BB_F32 | <b>1.093</b> ± 0.464 0.263066  | <b>1.542</b> ± 1.1404 0.35123 | <b>0.778</b> ± 0.3083 0.05672 | <b>1.029</b> ± 0.5879 0.90375 | AGGGGATAAAGGAGATTGTTGAAGCTGCTGGGGGAGTAAAAGCTGAAAG   |
| plasmid_lp28-1 | 24966 | BB_F32 | <b>0.345</b> ± 0.2824 0.126861 | <b>0.913</b> ± 0.4273 0.80931 | <b>1.288</b> ± 0.5552 0.38268 | <b>1.056</b> ± 0.8708 0.92544 | AGCTGGTAAAAGCTGTAAGAGCAGCTGAGGGGGCTCAAGTGGTACTGATG  |
| plasmid_lp28-1 | 25071 | BB_F32 | <b>1.408</b> ± 1.0523 0.374976 | <b>2.907</b> ± 3.1103 0.31217 | <b>1.086</b> ± 0.7504 0.65174 | <b>1.627</b> ± 1.0539 0.43891 | TTGCTTTGAGGGGGATGGCTAAAGCTGGAAGTTTGCTGTGAAGGATGGTG  |
| plasmid_lp28-1 | 25167 | BB_F32 | <b>1.245</b> ± 1.0276 0.671904 | <b>1.935</b> ± 1.5337 0.32256 | <b>1.013</b> ± 0.3496 0.94881 | <b>2.064</b> ± 1.474 0.264    | CAATCCGATTGCTGCTGCTATTGGGAAGGTAATGAGGAGATGGTGCGG    |
| plasmid_lp28-1 | 25231 | BB_F32 | <b>0.575</b> ± 0.1899 0.157929 | <b>0.536</b> ± 0.2971 0.25842 | <b>0.746</b> ± 0.2753 0.42972 | <b>1.081</b> ± 0.3862 0.79262 | ATATCTGCTCCCACTAACAGCACTAACAGCACCAGCCGCTTGCTAGCAG   |
| plasmid_lp28-1 | 25234 | BB_F32 | <b>0.430</b> ± 0.583 0.248303  | <b>1.845</b> ± 2.2183 0.58074 | <b>0.639</b> ± 0.2408 0.12234 | <b>0.411</b> ± 0.3248 0.07331 | TCTGCTCCCACTAACAGCACTAACAGCACCAGCCGCTTGCTAGCAGCCT   |
| plasmid_lp28-1 | 25419 | BB_F32 | <b>1.077</b> ± 0.5015 0.552665 | <b>1.616</b> ± 1.2291 0.35849 | <b>0.819</b> ± 0.3211 0.03512 | <b>1.04</b> ± 0.5664 0.86974  | AGGGGATAAAGGAGATTGTTGAAGCTGCTGGGGGAGTAAAAGCTGAAAG   |
| plasmid_lp28-1 | 25542 | BB_F32 | <b>0.385</b> ± 0.3294 0.112439 | <b>0.851</b> ± 0.3924 0.64685 | <b>1.35</b> ± 0.5658 0.42059  | <b>1.165</b> ± 0.9909 0.7917  | AGCTGGTAAAAGCTGTAAGAGCAGCTGAGGGGGCTCAAGTGGTACTGATG  |
| plasmid_lp28-1 | 25650 | BB_F32 | <b>0.674</b> ± 0.3669 0.193154 | <b>0.6</b> ± 0.5242 0.52727   | <b>0.985</b> ± 0.5332 0.91415 | <b>1.135</b> ± 0.7529 0.38737 | TTGCTTTGAGGGGGATGGCTAAAGCTGGAAGTTTGCTGTGAAGAGTGGTG  |
| plasmid_lp28-1 | 25819 | BB_F32 | <b>0.515</b> ± 0.2333 0.051969 | <b>0.475</b> ± 0.2885 0.18289 | <b>0.768</b> ± 0.3628 0.54706 | <b>1.073</b> ± 0.412 0.83004  | ATATCTGCTCCCACTAACAGCACTAACAGCACCAGCCGCTTGCTAGCAG   |
| plasmid_lp28-1 | 25822 | BB_F32 | <b>0.430</b> ± 0.6425 0.315285 | <b>1.898</b> ± 2.0067 0.53575 | <b>0.772</b> ± 0.1061 0.0497  | <b>0.632</b> ± 0.3807 0.15017 | TCTGCTCCCACTAACAGCACTAACAGCACCAGCCGCTTGCTAGCAGCCT   |









|              |       |         |                                |                               |                               |                               |                                                       |
|--------------|-------|---------|--------------------------------|-------------------------------|-------------------------------|-------------------------------|-------------------------------------------------------|
| plasmid_lp36 | 2002  | BB_K02a | <b>1.014</b> ± 0.6786 0.862206 | <b>2.204</b> ± 1.6396 0.11536 | <b>1.17</b> ± 0.747 0.67433   | <b>1.294</b> ± 0.8553 0.19705 | TAAGGCACTGTATAAAGAATATAAATGAAAAATTTATATTTCTGTATTC     |
| plasmid_lp36 | 2744  | BB_K02a | <b>1.054</b> ± 0.8722 0.939389 | <b>0.392</b> ± 0.5697 0.17434 | <b>1.408</b> ± 0.9422 0.6     | <b>1.15</b> ± 1.1413 0.87273  | CAATATCAAATCCTTCTGTAATATCTGGAACCTCAATTCATAGTAAAAAA    |
| plasmid_lp36 | 3053  | BB_K02a | <b>0.695</b> ± 0.1938 0.101114 | <b>0.898</b> ± 0.2465 0.56279 | <b>0.874</b> ± 0.3402 0.16177 | <b>1.005</b> ± 0.5261 0.97422 | ATTATACCATTAAGAAGATTTAGAAAAATCTAAAAAGATATACAAAAAT     |
| plasmid_lp36 | 3359  | BB_K02a | <b>1.281</b> ± 0.8265 0.500227 | <b>1.656</b> ± 1.7519 0.27484 | <b>0.631</b> ± 0.5548 0.16589 | <b>0.787</b> ± 0.8224 0.07389 | TACTGCTTGAATATTTATATTTTTAGTCTTTATTAATAACATTTCAACTA    |
| plasmid_lp36 | 3535  | BB_K02a | <b>0.674</b> ± 0.6656 0.471648 | <b>0.568</b> ± 0.4734 0.33068 | <b>0.742</b> ± 0.2136 0.03745 | <b>0.882</b> ± 0.2151 0.46499 | GATATAAAAATCATTGATAAATTTCTGTGGATCGGGAAATTTTTAATTTCT   |
| plasmid_lp36 | 4189  | IG 1231 | <b>2.306</b> ± 3.5439 0.156862 | <b>1.589</b> ± 2.2262 0.67015 | <b>1.014</b> ± 1.2565 0.98837 | <b>1.62</b> ± 2.1111 0.60591  | GTTTAAATCAATTCATCCCAATGAGATTTTACACCAATTTTATAAGTTAT    |
| plasmid_lp36 | 4342  | IG 1232 | <b>1.231</b> ± 0.6634 0.493185 | <b>1.311</b> ± 1.136 0.29652  | <b>0.794</b> ± 0.4811 0.36773 | <b>0.886</b> ± 0.6081 0.79183 | GATACAAAAATCTTTTGGAGTATGTCTATCAGTCAATCTAGTTTAAATGTC   |
| plasmid_lp36 | 4345  | IG 1233 | <b>1.479</b> ± 0.3186 0.007631 | <b>1.43</b> ± 1.1219 0.52482  | <b>0.649</b> ± 0.2117 0.16656 | <b>0.718</b> ± 0.1439 0.13948 | ATCAAATAATTTAAAAAATAATTAAGTTTATGATAAAATTTAGTCCAAAAAT  |
| plasmid_lp36 | 4791  | IG 1234 | <b>1.064</b> ± 0.266 0.594969  | <b>1.221</b> ± 0.8245 0.59836 | <b>0.739</b> ± 0.1413 0.12055 | <b>0.873</b> ± 0.3094 0.42455 | GATATATCGATACCGTGAATGGAATTGATCTGAAATTTGACITTTAAAAAAT  |
| plasmid_lp36 | 4948  | IG 1235 | <b>1.215</b> ± 0.96 0.788161   | <b>1.348</b> ± 2.1744 0.78598 | <b>0.336</b> ± 0.3226 0.10595 | <b>0.292</b> ± 0.3787 0.06293 | GTATATATGATGGTTTGGGCTCTTCAAAGTTAGTGTGTTCATTATTTGTC    |
| plasmid_lp36 | 4952  | IG 1236 | <b>0.805</b> ± 0.184 0.14529   | <b>1.134</b> ± 0.1555 0.32581 | <b>0.757</b> ± 0.0586 0.01997 | <b>0.912</b> ± 0.1603 0.50147 | TATACTATTTTCTTATGCACTAAACAGTGAAAGCAAAATCAAATATAG      |
| plasmid_lp36 | 4953  | IG 1237 | <b>1.200</b> ± 0.6173 0.100399 | <b>2.082</b> ± 1.8592 0.26872 | <b>0.988</b> ± 0.5382 0.92274 | <b>1.108</b> ± 0.7177 0.64508 | TATGATGGTTGGGCTCTTCAAAGTTAGTGTGTTCCTATTTTGCAATTA      |
| plasmid_lp36 | 5111  | IG 1238 | <b>0.737</b> ± 0.6867 0.329558 | <b>1.03</b> ± 1.015 0.94725   | <b>0.468</b> ± 0.3485 0.11053 | <b>0.785</b> ± 0.5363 0.37559 | TGAGGTTAAAAATATAATGAATAATCAAAAATTTCAAAAAACCTCCTATAGTA |
| plasmid_lp36 | 5623  | BB_K07  | <b>0.780</b> ± 1.1145 0.402861 | <b>2.536</b> ± 3.7617 0.39109 | <b>0.933</b> ± 1.0758 0.8756  | <b>1.238</b> ± 1.548 0.43965  | AAGATGGTGAATTAATGATGAGTTGCTAAAAATACGGTAAGTAGCAAT      |
| plasmid_lp36 | 5674  | BB_K07  | <b>0.443</b> ± 0.2307 0.050178 | <b>0.154</b> ± 0.146 0.06019  | <b>0.829</b> ± 0.4695 0.2558  | <b>1.035</b> ± 0.5887 0.83417 | TATTAATTAAGTGTGTGAAAAACCGAATCAATTTTTCTGATGAATCCTTAA   |
| plasmid_lp36 | 5676  | BB_K07  | <b>1.284</b> ± 1.2873 0.614931 | <b>1.08</b> ± 0.9947 0.9232   | <b>0.796</b> ± 0.4059 0.55471 | <b>0.52</b> ± 0.4015 0.10734  | ATATAGGTTAATATGCTACCTATGCAGCCAAAAAGTAATTTGAAGAATGGAC  |
| plasmid_lp36 | 5683  | BB_K07  | <b>0.613</b> ± 0.7077 0.224174 | <b>0.826</b> ± 0.8715 0.63091 | <b>0.973</b> ± 0.3484 0.89208 | <b>0.778</b> ± 0.5763 0.2505  | GTGTTGAAAAACCGAATCAATTTTTCTGATGAATCTTAATCAATTTGTA     |
| plasmid_lp36 | 5755  | BB_K07  | <b>0.789</b> ± 0.1761 0.20206  | <b>0.644</b> ± 0.5616 0.46578 | <b>0.706</b> ± 0.1472 0.05389 | <b>0.675</b> ± 0.1362 0.10398 | CTTCTATGTTTTTACTTCTTCCCTGGAATTTTTGATCTTCAATTTCTTTTT   |
| plasmid_lp36 | 5895  | BB_K07  | <b>0.926</b> ± 0.5243 0.773267 | <b>1.402</b> ± 0.5866 0.30801 | <b>0.708</b> ± 0.2644 0.22874 | <b>1.058</b> ± 0.3308 0.64879 | CAGGCTAAGTTCGAAAAAATCACAAAATTAECTCCGGAAGAGCTAGAAA     |
| plasmid_lp36 | 6010  | BB_K07  | <b>1.081</b> ± 0.6573 0.216269 | <b>1.551</b> ± 1.6119 0.4648  | <b>0.697</b> ± 0.3296 0.22492 | <b>0.932</b> ± 0.4768 0.46746 | CTGCTAATAATTCATGTAATGCGCATGTAGACAATCCCAATGATGAAGCA    |
| plasmid_lp36 | 6364  | IG 1239 | <b>0.745</b> ± 0.5627 0.471492 | <b>1.381</b> ± 1.1711 0.58926 | <b>0.599</b> ± 0.678 0.53402  | <b>1.004</b> ± 0.8127 0.99589 | AGATATTTAAAAGTTAAAAATCAAATAGTTGAGTGTGATCAAGACCCGAA    |
| plasmid_lp36 | 6706  | IG 1240 | <b>1.294</b> ± 0.6969 0.375241 | <b>1.392</b> ± 1.1833 0.57809 | <b>0.825</b> ± 0.3926 0.599   | <b>1.138</b> ± 0.7493 0.79361 | GTTGCAAGAACCCTTTGCCAAAAGAAAATAATTTTTCTTCTTTTTATT      |
| plasmid_lp36 | 7307  | IG 1241 | <b>1.277</b> ± 1.0889 0.250147 | <b>1.697</b> ± 2.1069 0.46773 | <b>0.886</b> ± 0.6457 0.22385 | <b>0.988</b> ± 0.6286 0.9434  | TAACACACCCGCTAAAGGAGTTTACAATGAGTAACTAATATTGGCAAT      |
| plasmid_lp36 | 7365  | BB_K12  | <b>1.020</b> ± 0.6214 0.339349 | <b>1.544</b> ± 1.5577 0.43291 | <b>0.704</b> ± 0.3638 0.21591 | <b>0.92</b> ± 0.5186 0.33457  | CTGCTAATAATTCATGTAATGGTATGTAGACAATACCAATGATGAAGCA     |
| plasmid_lp36 | 7458  | BB_K12  | <b>0.884</b> ± 1.0308 0.873439 | <b>2.156</b> ± 2.5577 0.53096 | <b>0.769</b> ± 0.8781 0.72042 | <b>0.316</b> ± 0.3535 0.018   | TTAGATGAGATAAGTGAAGCCACAGGCCAAGTTCCGGAAAAAATCACAAA    |
| plasmid_lp36 | 7480  | BB_K12  | <b>0.807</b> ± 0.6266 0.292517 | <b>0.9</b> ± 0.9523 0.79774   | <b>0.514</b> ± 0.2147 0.11642 | <b>1.068</b> ± 0.4343 0.44237 | CAGGCCAAGTTCGAAAAAATCACAAAATTAECTCCGGAAGAGCTAGAAA     |
| plasmid_lp36 | 7620  | BB_K12  | <b>0.998</b> ± 0.2122 0.989326 | <b>0.549</b> ± 0.4818 0.31015 | <b>0.633</b> ± 0.1268 0.06511 | <b>0.823</b> ± 0.2446 0.46166 | CTTCTATGTTTTTACTTTCCCTGGATTTTTTTGATCTTCAATTTCTTTTT    |
| plasmid_lp36 | 7692  | BB_K12  | <b>1.113</b> ± 0.581 0.645502  | <b>1.941</b> ± 1.7673 0.41466 | <b>0.96</b> ± 0.286 0.75713   | <b>1.236</b> ± 0.6021 0.41151 | GTGTTGAAAAACCGAATCAATTTTTCTGATGAATCTTTATCAATTTGA      |
| plasmid_lp36 | 7699  | BB_K12  | <b>1.126</b> ± 1.3782 0.783851 | <b>1.139</b> ± 1.082 0.87881  | <b>0.868</b> ± 0.5158 0.71403 | <b>0.631</b> ± 0.7057 0.17024 | ATATAGGTTAATATGCTACCTATGCAGCCAAAAAGTAATTTGAAGAATGGAC  |
| plasmid_lp36 | 7701  | BB_K12  | <b>0.480</b> ± 0.2369 0.006608 | <b>0.241</b> ± 0.2913 0.10316 | <b>1.148</b> ± 0.7268 0.65159 | <b>1.24</b> ± 0.7371 0.49106  | TATTAATTAAGTGTGTAAGAACCGAATCAATTTTTCTGATGAATCTTTTA    |
| plasmid_lp36 | 7752  | BB_K12  | <b>1.078</b> ± 1.4467 0.885355 | <b>2.804</b> ± 3.893 0.39706  | <b>0.988</b> ± 0.9883 0.98178 | <b>1.087</b> ± 1.2953 0.80482 | AAGATGGTGAATAATGATGAGTTGCTAAAAAATACGGTAAGTAGCAAT      |
| plasmid_lp36 | 7968  | BB_K12  | <b>1.425</b> ± 1.0929 0.143475 | <b>2.64</b> ± 2.9028 0.2822   | <b>1.22</b> ± 0.9129 0.28088  | <b>1.259</b> ± 0.9358 0.43787 | CACCTCAAAGTATGTTTCTACATTTTTCTAAGAGTTTGAATACATTTTT     |
| plasmid_lp36 | 7981  | BB_K12  | <b>1.032</b> ± 1.2942 0.94391  | <b>1.516</b> ± 2.5129 0.33274 | <b>0.93</b> ± 1.8797 0.79881  | <b>1.522</b> ± 1.823 0.41722  | AGTTCGCTGCATACACCTCAAAGTATGTTTCTACATTTTTCTAAGAGTT     |
| plasmid_lp36 | 8078  | IG 1242 | <b>0.808</b> ± 0.5044 0.717579 | <b>0.964</b> ± 0.4549 0.92703 | <b>0.297</b> ± 0.426 0.14807  | <b>0.365</b> ± 0.5211 0.06886 | TGCTTCAATTAAGTGTGTGATGTCGCGTCATGGTATGAAACCGCAAGCTATT  |
| plasmid_lp36 | 8395  | BB_K13  | <b>0.778</b> ± 0.9133 0.500504 | <b>1.222</b> ± 1.3661 0.58263 | <b>0.701</b> ± 0.5344 0.51294 | <b>0.8</b> ± 0.5957 0.55067   | CTTTGACAATAATGATATAAAGCCGGAATGTTAGCAGATTTCAATTAG      |
| plasmid_lp36 | 8651  | BB_K13  | <b>1.505</b> ± 2.3647 0.677506 | <b>0.385</b> ± 0.7587 0.3541  | <b>0.52</b> ± 0.762 0.57196   | <b>0.56</b> ± 0.9159 0.59773  | TTAATATCATTTATAGTGTACCGGTTAAGCTGATCTAAGCCCAAATA       |
| plasmid_lp36 | 8702  | BB_K13  | <b>0.917</b> ± 0.5669 0.822037 | <b>0.653</b> ± 0.4337 0.25712 | <b>0.811</b> ± 0.5043 0.28482 | <b>1.118</b> ± 0.6074 0.55487 | GAAAGCGTTGATAAAATTTCTCTTCGCTAAGACCCTTACCGTAATATAA     |
| plasmid_lp36 | 8798  | BB_K13  | <b>0.832</b> ± 0.2616 0.415912 | <b>0.936</b> ± 0.1953 0.58009 | <b>0.843</b> ± 0.1184 0.08552 | <b>0.918</b> ± 0.2175 0.29987 | ATTGATGATATAAACAAAAGTAAACAAAATAACAAGAAATATATTTCTTTT   |
| plasmid_lp36 | 8861  | IG 1243 | <b>1.131</b> ± 1.2115 0.163493 | <b>2.026</b> ± 2.7907 0.3939  | <b>0.814</b> ± 1.0028 0.79085 | <b>1.407</b> ± 1.1999 0.182   | GATTGACCTCTAAAAGCAATAATATTTAAATTAATTTAAATTTAAATTT     |
| plasmid_lp36 | 9128  | IG 1244 | <b>1.285</b> ± 1.5931 0.659333 | <b>2.367</b> ± 3.0711 0.19256 | <b>1.079</b> ± 1.3003 0.62581 | <b>0.911</b> ± 1.0877 0.89158 | TTTTGAAATGTTAAATAATTTATGTTACTTAATTTCAACAACAAGATATAAAA |
| plasmid_lp36 | 9239  | IG 1245 | <b>1.212</b> ± 0.5375 0.090666 | <b>1.268</b> ± 0.5883 0.58635 | <b>0.437</b> ± 0.1833 0.16137 | <b>0.743</b> ± 0.2757 0.36413 | AGGGCTTTATTTGAAAAAAAATAATATTATTAATCAATTTTTTTTTAT      |
| plasmid_lp36 | 9425  | BB_K15  | <b>1.091</b> ± 1.3746 0.778249 | <b>1.263</b> ± 1.7975 0.8156  | <b>0.213</b> ± 0.2633 0.21224 | <b>0.801</b> ± 1.0807 0.7523  | ACTTCTACAAAAATTTATTTCAAGATAAAAAGTTCATTCTTTCTCCCCGC    |
| plasmid_lp36 | 9479  | BB_K15  | <b>1.224</b> ± 0.7033 0.585491 | <b>1.647</b> ± 1.2652 0.19608 | <b>0.985</b> ± 0.6199 0.9691  | <b>1.114</b> ± 0.6688 0.67059 | ATCAATATAATCTCCATTTAAAAATGTTAGTTGATACACTAAGGAAAA      |
| plasmid_lp36 | 9647  | BB_K15  | <b>0.241</b> ± 0.1652 0.007366 | <b>1.831</b> ± 0.2519 0.03049 | <b>0.259</b> ± 0.4203 0.09977 | <b>0.769</b> ± 1.1841 0.77435 | GCATTAAGAAGATTGCTAATAAAAATTATGCAAAAATCGGGGCATAGAATCC  |
| plasmid_lp36 | 9674  | BB_K15  | <b>1.249</b> ± 0.6268 0.074807 | <b>2.179</b> ± 2.0405 0.28111 | <b>0.975</b> ± 0.5021 0.79423 | <b>1.149</b> ± 0.5396 0.42901 | TGCAAAAATCGGGGCATAGAATTTCAATTTAGATTTGAGGCAATTAAGGCG   |
| plasmid_lp36 | 9727  | BB_K15  | <b>0.778</b> ± 0.821 0.111182  | <b>1.411</b> ± 1.0403 0.42675 | <b>0.789</b> ± 0.6251 0.74101 | <b>0.863</b> ± 0.6545 0.74003 | ACAGCCTCATTATTGCCTCAAATCTAAATTTGGAATTTCTATGCCCGCATTTT |
| plasmid_lp36 | 9734  | BB_K15  | <b>1.007</b> ± 0.2717 0.909411 | <b>1.31</b> ± 0.5764 0.19188  | <b>0.733</b> ± 0.1742 0.12796 | <b>0.937</b> ± 0.2785 0.29445 | TCAAGTAACAGCCTCATTATGCTCAAAATCTAAATTTGGAATTTCTATGCC   |
| plasmid_lp36 | 10199 | IG 1246 | <b>1.069</b> ± 0.1955 0.379579 | <b>1.376</b> ± 0.5901 0.24403 | <b>0.844</b> ± 0.2093 0.00118 | <b>1.033</b> ± 0.2769 0.55857 | CAGTTGCAATTAATATACTGGCACTTTGCCTATAATTTAAGTTTAAAGA     |
| plasmid_lp36 | 10457 | BB_K17  | <b>1.230</b> ± 1.348 0.385555  | <b>1.906</b> ± 2.5568 0.24413 | <b>0.517</b> ± 0.5325 0.42816 | <b>0.989</b> ± 0.9661 0.9809  | TATGCGCATCAATAAATCCTGGCAGCACATATTCATCAATGTGCGCATTAA   |

|              |       |         |                                 |                               |                               |                               |                                                         |
|--------------|-------|---------|---------------------------------|-------------------------------|-------------------------------|-------------------------------|---------------------------------------------------------|
| plasmid_lp36 | 10550 | BB_K17  | <b>1.163</b> ± 1.2114 0.563057  | <b>1.827</b> ± 2.6607 0.44073 | <b>0.772</b> ± 0.7533 0.53828 | <b>1.387</b> ± 1.3049 0.07602 | TTTCATGAGGATCGCTTATTGTAGCCACAGTCCCGTGCGCAACTACTAAAT     |
| plasmid_lp36 | 10584 | BB_K17  | <b>0.487</b> ± 0.1477 0.032825  | <b>1.078</b> ± 1.0315 0.8871  | <b>0.521</b> ± 0.3795 0.23085 | <b>0.924</b> ± 0.5151 0.65972 | AAATTTGATGCCATCAATACCATTAAACATTGGCTATTTATCAGGATCGCCT    |
| plasmid_lp36 | 10596 | BB_K17  | <b>1.090</b> ± 0.5622 0.086531  | <b>1.984</b> ± 1.9413 0.36161 | <b>0.957</b> ± 0.353 0.82245  | <b>1.247</b> ± 0.7686 0.28127 | ATTTCAAAAAAACCAGATTTAAATTTTTTTTGGAGCTCTTCTTTGTTGTC      |
| plasmid_lp36 | 10728 | BB_K17  | <b>0.673</b> ± 0.9447 0.299205  | <b>0.562</b> ± 0.9284 0.61195 | <b>1.343</b> ± 0.8466 0.53189 | <b>1.415</b> ± 1.0622 0.46772 | TTTACTATTTGGCTGGAAGTAAATGGATTTTAAAGGCGGAAATCAAAAGATA    |
| plasmid_lp36 | 10873 | BB_K17  | <b>3.777</b> ± 3.188 0.186823   | <b>6.858</b> ± 10.856 0.42137 | <b>1.732</b> ± 1.3213 0.42078 | <b>2.163</b> ± 2.3704 0.50863 | TGCATCTTCAGGCATTAGCACTGATCATGAATGTTTAAACAATAGAAGATGC    |
| plasmid_lp36 | 10955 | BB_K17  | <b>0.526</b> ± 0.3491 0.127739  | <b>0.793</b> ± 0.3575 0.5885  | <b>0.333</b> ± 0.2289 0.1745  | <b>0.885</b> ± 0.4331 0.78139 | GTATTTTTATGCCAAAAGATAATTTATATCTTGCATCTTCTATTGTTAAAC     |
| plasmid_lp36 | 11336 | BB_K17  | <b>1.100</b> ± 0.5472 0.200027  | <b>1.574</b> ± 1.3055 0.31381 | <b>0.723</b> ± 0.3582 0.14404 | <b>1.114</b> ± 0.6027 0.17082 | AAACAATTTTAATTTAGTCAAATACTATTTTCGGATTTTAAATTTTCCACT     |
| plasmid_lp36 | 11630 | BB_K17  | <b>0.921</b> ± 0.6507 0.868965  | <b>1.091</b> ± 0.9026 0.89027 | <b>0.5</b> ± 0.3107 0.17313   | <b>0.995</b> ± 0.3374 0.98415 | CTTGTGGAAGCAATGAATATTTGTGTAAGCGCGAAATCAAAATCATC         |
| plasmid_lp36 | 11650 | BB_K17  | <b>0.915</b> ± 0.3639 0.738892  | <b>1.448</b> ± 0.5305 0.14869 | <b>1.361</b> ± 0.5087 0.31465 | <b>1.425</b> ± 0.5546 0.08452 | TTCATCATTGCTTCCAACAAGTATGATGTTGTGAGAATCATGAGCAACTGT     |
| plasmid_lp36 | 12037 | IG 1247 | <b>1.066</b> ± 0.3518 0.679922  | <b>1.401</b> ± 0.5422 0.27777 | <b>0.901</b> ± 0.2129 0.12574 | <b>1.013</b> ± 0.1779 0.76919 | TCTATTAAGGATTATAATTTGTGTGCTCGCAGTTTTTATTTAAAAATT        |
| plasmid_lp36 | 12038 | IG 1248 | <b>1.065</b> ± 0.4284 0.817497  | <b>1.479</b> ± 1.1156 0.35128 | <b>0.764</b> ± 0.5107 0.43463 | <b>1.059</b> ± 0.439 0.72596  | GATAAATAACAGACAAAAAACTTTTGAGTTCCTCAACAATTTTATCGCTTA     |
| plasmid_lp36 | 12054 | IG 1249 | <b>0.941</b> ± 1.0225 0.912578  | <b>1.4</b> ± 1.6268 0.66927   | <b>0.924</b> ± 0.9352 0.9052  | <b>1.753</b> ± 1.1084 0.33111 | ATTGTTGTCTGGCAGTTTTTATTTAAAAATTTTATGCAATTAATCCCT        |
| plasmid_lp36 | 12156 | IG 1250 | <b>0.553</b> ± 0.3744 0.104757  | <b>0.615</b> ± 0.5397 0.25574 | <b>0.764</b> ± 0.1135 0.02588 | <b>0.98</b> ± 1.0307 0.76518  | ATATCTGTAAATAACGCCAAAAACGTTACTATTTGATTTAAATTTATGGAAACCA |
| plasmid_lp36 | 12163 | IG 1251 | <b>0.832</b> ± 0.7801 0.444795  | <b>1.575</b> ± 2.3328 0.63749 | <b>0.855</b> ± 0.7219 0.78174 | <b>0.842</b> ± 0.5172 0.31383 | CAGGATATTATTTATGGTGCTTGCTCCAAACAGCAATCAAAAACTACT        |
| plasmid_lp36 | 12376 | IG 1252 | <b>1.760</b> ± 1.461 0.174394   | <b>1.481</b> ± 1.6562 0.35766 | <b>1.273</b> ± 1.1944 0.407   | <b>1.247</b> ± 1.2382 0.61522 | CATCTAAAAATAAATCAATAAAAAATCATTTTTGTTTCGGCTCCGCTTTTA     |
| plasmid_lp36 | 12513 | IG 1253 | <b>1.996</b> ± 1.2106 0.319978  | <b>1.428</b> ± 0.4981 0.28559 | <b>1.004</b> ± 0.5466 0.99287 | <b>1.755</b> ± 0.3539 0.05022 | ATTAATAAATATCTTTTTTAAAAATAAATTTTTATAGAGGTAATAAAAAA      |
| plasmid_lp36 | 12615 | BB_K19  | <b>0.906</b> ± 0.7161 0.883929  | <b>0.726</b> ± 0.416 0.14169  | <b>0.675</b> ± 0.4389 0.52484 | <b>0.845</b> ± 0.3511 0.54965 | ATATATTTTTCAATTTATAACTCCTTAATTTAATTTACTTTATTTAA         |
| plasmid_lp36 | 12995 | BB_K19  | <b>2.197</b> ± 2.3467 0.434041  | <b>1.863</b> ± 1.7428 0.14631 | <b>1.022</b> ± 0.8982 0.97689 | <b>0.268</b> ± 0.2449 0.22019 | TCTTATTATCTTTAAATTCTAATAAAATATGATCATTAATGTTTTTATGG      |
| plasmid_lp36 | 13002 | BB_K19  | <b>0.950</b> ± 0.0956 0.294315  | <b>1.495</b> ± 0.8616 0.41031 | <b>0.699</b> ± 0.0845 0.00895 | <b>0.934</b> ± 0.0771 0.28942 | TAATTCGATTATCTGAACCTAAAAACATTTACTAAAAAGCAAGAAAAAAC      |
| plasmid_lp36 | 13248 | IG 1254 | <b>1.299</b> ± 0.9991 0.314265  | <b>2.307</b> ± 2.5259 0.33657 | <b>0.905</b> ± 0.6248 0.08175 | <b>1.239</b> ± 0.9265 0.24175 | CTACATTTCAATAAAATAAAAGAAGCCCTAAAAATAGGGGCTCTTTATTT      |
| plasmid_lp36 | 13370 | IG 1255 | <b>0.550</b> ± 0.6021 0.490652  | <b>1.126</b> ± 1.9368 0.70397 | <b>0.719</b> ± 0.9242 0.46608 | <b>1.162</b> ± 1.3539 0.84903 | TTAAAAATACAAATCTAAATAAAGTGATTTCTTTAGATTTACAGTGGCT       |
| plasmid_lp36 | 15971 | IG 1256 | <b>1.238</b> ± 0.9867 0.767596  | <b>2.106</b> ± 2.7229 0.47115 | <b>1.158</b> ± 0.7772 0.80591 | <b>1.468</b> ± 1.322 0.56705  | GAATAATAAAATAACAACCCAGGTTGTAATAATACAAAACAATCTAAAAAAT    |
| plasmid_lp36 | 17085 | IG 1257 | <b>1.364</b> ± 0.4297 0.7070372 | <b>1.661</b> ± 1.136 0.35251  | <b>0.763</b> ± 0.2102 0.18636 | <b>0.938</b> ± 0.3032 0.78391 | ATAAGCTCTATCACTATGTTTTATAATATCTACAAAGTAAGAAATA          |
| plasmid_lp36 | 17929 | BB_K55  | <b>1.182</b> ± 0.4687 0.604844  | <b>0.895</b> ± 0.9097 0.80831 | <b>0.843</b> ± 0.2905 0.60355 | <b>0.732</b> ± 0.4864 0.53187 | TAAAGAGATACATTTGGATCATTTGTTTTATAATGTAATCGG              |
| plasmid_lp36 | 18045 | BB_K55  | <b>1.167</b> ± 0.8074 0.653774  | <b>1.752</b> ± 1.4793 0.05115 | <b>0.868</b> ± 0.6688 0.71616 | <b>1.448</b> ± 1.0741 0.18602 | TATTTGCTCTGTGAATTATCATCTATTGAAGAAAGTTATTTTTATA          |
| plasmid_lp36 | 18380 | BB_K55  | <b>1.003</b> ± 1.1688 0.996796  | <b>0.068</b> ± 0.1269 0.16043 | <b>0.358</b> ± 0.4024 0.23386 | <b>0.718</b> ± 1.3343 0.80078 | TAAGCTCCATACCTTCCATTTGAAAGTATTCCAATATGTTTTGATATTG       |
| plasmid_lp36 | 18489 | IG 1258 | <b>0.766</b> ± 0.6569 0.557412  | <b>1.372</b> ± 1.8019 0.40716 | <b>0.617</b> ± 0.5625 0.3782  | <b>0.889</b> ± 0.9298 0.50901 | GCTAAATAAAATAAAACCATTCTGTATTTTATTTCTTTTTTGCCTCAAT       |
| plasmid_lp36 | 18492 | IG 1259 | <b>0.736</b> ± 0.9769 0.598091  | <b>1.488</b> ± 2.1937 0.70179 | <b>0.744</b> ± 0.5463 0.49553 | <b>0.819</b> ± 0.9029 0.7083  | TATTTAAGAAAAAGAAAGTCTCTAAAAACAAGTAATGTAATAGCAGTTGA      |
| plasmid_lp36 | 18669 | IG 1260 | <b>0.860</b> ± 0.9858 0.265891  | <b>1.158</b> ± 1.2156 0.42018 | <b>0.787</b> ± 0.5503 0.56689 | <b>0.867</b> ± 0.6839 0.6158  | CTTAAATCTTTGTCATATATATTTTTTTTACAATTTTAAATACTATAGA       |
| plasmid_lp36 | 18694 | IG 1261 | <b>1.897</b> ± 0.8378 0.113308  | <b>1.159</b> ± 0.5636 0.69874 | <b>1.103</b> ± 0.6387 0.85132 | <b>1.503</b> ± 1.3853 0.4006  | TAACGAGTAATCTTTGTCTGATACCTTAAATCTTTGTCAATATATATT        |
| plasmid_lp36 | 18949 | IG 1262 | <b>0.494</b> ± 0.4764 0.064968  | <b>1.232</b> ± 1.5406 0.77648 | <b>0.772</b> ± 0.9057 0.26512 | <b>0.887</b> ± 0.5955 0.56181 | TTTGTAGAAGATAAGGTTAAATTTGAAATGAAAGTAAAGTTTGCTAAGTATT    |
| plasmid_lp36 | 19271 | IG 1263 | <b>0.945</b> ± 0.8788 0.723489  | <b>1.061</b> ± 1.1229 0.86545 | <b>0.708</b> ± 0.4545 0.4323  | <b>1.172</b> ± 1.1039 0.34992 | TATATTCACCTTCTCATATTCTTTGTATGTAAGTAGCAACTTTGTTTACT      |
| plasmid_lp36 | 19562 | IG 1264 | <b>0.289</b> ± 0.2583 0.07531   | <b>0.677</b> ± 1.0432 0.50524 | <b>0.548</b> ± 0.3744 0.22759 | <b>0.526</b> ± 0.399 0.41633  | AGTATTTCTGCTTTATTTTTATTGTTCTTTATGCTTAGTCTTCTGTAG        |
| plasmid_lp36 | 19578 | IG 1265 | <b>1.144</b> ± 1.1418 0.860552  | <b>1.275</b> ± 1.2707 0.77881 | <b>0.696</b> ± 0.689 0.64346  | <b>0.666</b> ± 0.466 0.56149  | TTTTTTTTTGTCTTTTATGCTTAGTCTCTGTAGCTAGGAATATGTTTTG       |
| plasmid_lp36 | 19612 | IG 1266 | <b>1.073</b> ± 0.5967 0.824346  | <b>0.994</b> ± 0.2697 0.93819 | <b>0.95</b> ± 0.3248 0.57668  | <b>1.093</b> ± 0.3433 0.59618 | GCTAGGAATATGTTTTGAGAAGAAATCTGATTCATTAACCTAGTTTTCTC      |
| plasmid_lp36 | 19737 | IG 1267 | <b>0.971</b> ± 1.1043 0.9753    | <b>2.252</b> ± 3.7962 0.63902 | <b>1.416</b> ± 0.9359 0.42604 | <b>0.816</b> ± 0.932 0.79428  | AAATTTTTCCACTATGGAATTTGAGTTTTCCAGATGTTCCAGAAAGTTTGTAT   |
| plasmid_lp36 | 19833 | IG 1268 | <b>0.714</b> ± 0.9117 0.305678  | <b>1.1</b> ± 0.9128 0.89308   | <b>0.965</b> ± 0.736 0.95777  | <b>0.779</b> ± 0.64 0.42047   | TCTGCAATATCACTAAATCTAGTTTCATTAAGAAAGCATATATTTGCTAAT     |
| plasmid_lp36 | 19875 | IG 1269 | <b>1.105</b> ± 0.611 0.786457   | <b>1.343</b> ± 0.5532 0.40625 | <b>0.85</b> ± 0.2751 0.49959  | <b>1.019</b> ± 0.8065 0.97251 | TTTGCTAATATAAACTTAACTATATTATCAATTTCAAAATCAAAAAAGA       |
| plasmid_lp36 | 20108 | IG 1270 | <b>0.573</b> ± 0.419 0.431772   | <b>0.632</b> ± 0.5576 0.39955 | <b>0.318</b> ± 0.2251 0.22925 | <b>0.593</b> ± 0.4096 0.42463 | CATTTAAACTTTTTCAATTTTATTTAGAAGTTATTTTTTAAAGTCTGTTT      |
| plasmid_lp36 | 20412 | BB_K32  | <b>1.268</b> ± 0.8053 0.254242  | <b>2.285</b> ± 1.7421 0.18456 | <b>0.901</b> ± 0.4679 0.51708 | <b>1.042</b> ± 0.496 0.82679  | TTTGGCTTTGGGATTACTTTTTGGTTTTTAAAGTTGTGATTTACTATAAG      |
| plasmid_lp36 | 20510 | BB_K32  | <b>0.982</b> ± 0.1792 0.730954  | <b>1.188</b> ± 0.4214 0.57307 | <b>0.834</b> ± 0.1308 0.02754 | <b>0.97</b> ± 0.115 0.73702   | GAGTTTCCCTTATCAAATAAGCCAGGGGATTCCTCTTTTCAATTCATATCTT    |
| plasmid_lp36 | 21039 | BB_K32  | <b>0.314</b> ± 0.5033 0.220102  | <b>1.208</b> ± 1.3971 0.7367  | <b>0.464</b> ± 0.5144 0.47318 | <b>0.795</b> ± 1.0038 0.80972 | TTTAACACCTTCTAGATAAGATTGATATCGATTGCTTAATCTTATTTCTC      |
| plasmid_lp36 | 21079 | BB_K32  | <b>0.766</b> ± 0.6267 0.532292  | <b>1.253</b> ± 1.1716 0.56764 | <b>0.96</b> ± 0.6932 0.93022  | <b>0.808</b> ± 0.6677 0.75895 | TATAACTTATACATATTTTCAACAAAGCTAACCCAATGTAATTCACA         |
| plasmid_lp36 | 21354 | BB_K32  | <b>1.025</b> ± 0.4754 0.830891  | <b>1.096</b> ± 0.4912 0.58455 | <b>0.858</b> ± 0.285 0.35827  | <b>1.226</b> ± 0.3718 0.308   | TAAATTAGATTTCTTTGATCTTTGCAATTAAGTTTTTATTTCTGCTTC        |
| plasmid_lp36 | 21368 | BB_K32  | <b>0.896</b> ± 0.5818 0.553055  | <b>1.962</b> ± 2.1893 0.36044 | <b>0.735</b> ± 0.4942 0.17856 | <b>0.734</b> ± 0.5051 0.43009 | AAGCAATAGTAACGCTCAATCTTATTAATGAGGGATTCCTCTAAAGAAAGTGC   |
| plasmid_lp36 | 21494 | IG 1271 | <b>0.069</b> ± 0.0713 0.024611  | <b>0.692</b> ± 0.8704 0.68804 | <b>0.045</b> ± 0.0797 0.02915 | <b>0.308</b> ± 0.2336 0.00655 | AATATGAGCTTGTTTAAAGTAAATAATTAAGTTCTAGTTGAAAAAAG         |
| plasmid_lp36 | 21522 | IG 1272 | <b>1.136</b> ± 0.4769 0.308833  | <b>1.936</b> ± 1.2293 0.19077 | <b>0.796</b> ± 0.2874 0.46273 | <b>1.164</b> ± 0.4129 0.58522 | ATTATTTTACTTTAAACAAGCTACATATTACATATTATGTA               |
| plasmid_lp36 | 21686 | IG 1273 | <b>0.549</b> ± 0.6447 0.087267  | <b>0.291</b> ± 0.3986 0.3142  | <b>1.245</b> ± 1.2064 0.39622 | <b>0.51</b> ± 0.5781 0.54327  | GTA AAAAGCTATTCAAATACTTACTTTAAACATGGCAATCTACCAATTCT     |
| plasmid_lp36 | 21702 | IG 1274 | <b>1.037</b> ± 0.7527 0.93841   | <b>1.105</b> ± 0.5505 0.74553 | <b>0.657</b> ± 0.5648 0.4411  | <b>1.339</b> ± 0.3167 0.23026 | CAAAATGGTATTGTCAGCTTATTCCAACTTAAATTTCAATTTATCAACT       |

|              |       |          |                       |          |                       |         |                       |         |                       |         |                                                       |
|--------------|-------|----------|-----------------------|----------|-----------------------|---------|-----------------------|---------|-----------------------|---------|-------------------------------------------------------|
| plasmid_lp36 | 21951 | BB_K34   | <b>0.964</b> ± 0.5675 | 0.770495 | <b>0.885</b> ± 1.1051 | 0.77559 | <b>0.75</b> ± 0.4142  | 0.18435 | <b>0.911</b> ± 1.0513 | 0.80638 | CTATACTATTTAATAAGAGAAAAATTTATTTATCACTCAATATTAAGCTTG   |
| plasmid_lp36 | 21956 | BB_K34   | <b>1.758</b> ± 0.2884 | 0.046757 | <b>2.134</b> ± 1.5522 | 0.33899 | <b>1.03</b> ± 0.27    | 0.86215 | <b>1.511</b> ± 0.3139 | 0.14019 | GTATAGTAATGATATCCAAAGTATCAAGGGGCCATTATCTTCATTAGATA    |
| plasmid_lp36 | 22015 | BB_K34   | <b>0.957</b> ± 0.3165 | 0.845443 | <b>1.003</b> ± 0.4489 | 0.99354 | <b>0.883</b> ± 0.2651 | 0.61652 | <b>0.932</b> ± 0.3257 | 0.79335 | AATAGGGGAAAAACAAGCTTAATATTGAGTGATAATAATTTTTCTCTT      |
| plasmid_lp36 | 22052 | BB_K34   | <b>0.896</b> ± 0.6734 | 0.330964 | <b>1.923</b> ± 2.1103 | 0.40732 | <b>0.76</b> ± 0.5372  | 0.17381 | <b>1.333</b> ± 1.2479 | 0.5457  | GAGATAAGTAAATTTAAATTTGGATAGTAAAAATTTAAATGAGAAAA       |
| plasmid_lp36 | 22263 | IG 1275  | <b>0.588</b> ± 0.8241 | 0.058612 | <b>1.66</b> ± 1.1677  | 0.05283 | <b>0.554</b> ± 0.5536 | 0.44263 | <b>0.821</b> ± 0.6985 | 0.79511 | TGTTAAAAGGTTTTTATCAAAGTAAAAATATGGGTAAGGTTAAAAAGCC     |
| plasmid_lp36 | 22323 | BB_K35   | <b>1.492</b> ± 0.5663 | 0.299506 | <b>2.081</b> ± 1.3402 | 0.30689 | <b>0.978</b> ± 0.2384 | 0.91595 | <b>1.185</b> ± 0.3267 | 0.3497  | TATTAATATGGTAGAGATAAATCAGCTTAATGTAGAAGGTAAGATAGAAA    |
| plasmid_lp36 | 22325 | BB_K35   | <b>1.786</b> ± 1.772  | 0.393033 | <b>1.391</b> ± 0.8688 | 0.27278 | <b>0.967</b> ± 0.7968 | 0.88363 | <b>1.199</b> ± 0.9489 | 0.60039 | ATATAGCTAAGCGGCTTTTAACTTTACCCATATTTTTCAAGTTGAATAAA    |
| plasmid_lp36 | 22337 | BB_K35   | <b>1.166</b> ± 0.8478 | 0.492649 | <b>0.99</b> ± 0.7078  | 0.91422 | <b>0.347</b> ± 0.1817 | 0.11011 | <b>0.701</b> ± 0.405  | 0.17351 | GAGATAATCAGCTTAATGTAGAAGGTAAGATAGAAAATCATATAGATGTGA   |
| plasmid_lp36 | 22340 | BB_K35   | <b>1.076</b> ± 0.3168 | 0.014443 | <b>1.732</b> ± 1.0403 | 0.23806 | <b>0.915</b> ± 0.2116 | 0.36883 | <b>1.104</b> ± 0.3753 | 0.16254 | TCTCTACCATATTTAATATAGCTAAGCGGCTTTTTAACTTTACCCATATTT   |
| plasmid_lp36 | 22598 | IG 1276  | <b>1.064</b> ± 0.5359 | 0.890441 | <b>1.962</b> ± 1.2749 | 0.31888 | <b>0.818</b> ± 0.2693 | 0.41546 | <b>1.23</b> ± 0.4946  | 0.43362 | GTAATATTCATTAATGTGAATCTCTAAATCTCGGCATACATTTTTAAATGT   |
| plasmid_lp36 | 22910 | IG 1277  | <b>6.684</b> ± 6.397  | 0.255189 | <b>0</b> ± 0          | 0.01495 | <b>0.216</b> ± 0.3779 | 0.11409 | <b>1.812</b> ± 3.1626 | 0.67781 | AATTAATCATTTTTTAAATATTTATTGGTTTTATTGTTAAGCCAAAATA     |
| plasmid_lp36 | 23014 | IG 1278  | <b>1.449</b> ± 1.0926 | 0.430879 | <b>1.907</b> ± 1.2237 | 0.1504  | <b>0.927</b> ± 0.7187 | 0.75946 | <b>1.234</b> ± 0.8142 | 0.56772 | GTAGGCTCTATTGCAACAAGCATGACTAATTTTTACTTTTTATGTAATAAA   |
| plasmid_lp36 | 23131 | BB_K37   | <b>0.663</b> ± 0.4882 | 0.339721 | <b>0.322</b> ± 0.4138 | 0.12262 | <b>0.676</b> ± 0.4523 | 0.44492 | <b>1.291</b> ± 0.995  | 0.70022 | TTACTTCAACATATTAGCCCTCTGTGTAGTATTAGGTTGCTGATTGTTCAAGC |
| plasmid_lp36 | 23334 | BB_K37   | <b>1.541</b> ± 1.1263 | 0.419317 | <b>2.089</b> ± 1.2567 | 0.13996 | <b>0.737</b> ± 0.7876 | 0.64569 | <b>1.452</b> ± 0.8409 | 0.38808 | TGCTTCTTAAATGTTTGCTATGTTGATGCAACTTATTCTTTAGAAAAAGC    |
| plasmid_lp36 | 24166 | BB_K0058 | <b>1.151</b> ± 0.7873 | 0.713643 | <b>1.524</b> ± 1.719  | 0.51782 | <b>1.263</b> ± 1.6112 | 0.7675  | <b>0.862</b> ± 0.5324 | 0.76192 | CCTTCTCTGTAAGCCAAATTAAGAAGAACAGTAGAAGGATAGAGGCAGGT    |
| plasmid_lp36 | 24285 | IG 1279  | <b>1.223</b> ± 0.8823 | 0.719325 | <b>1.672</b> ± 2.3465 | 0.58319 | <b>0.965</b> ± 0.7961 | 0.94049 | <b>1.744</b> ± 0.9956 | 0.29149 | AGTAGCATATGCTTACTATAAAAATATTAGAAATGGCAAAGAAAGTGCC     |
| plasmid_lp36 | 24294 | BB_K39   | <b>0.894</b> ± 0.2269 | 0.516836 | <b>0.755</b> ± 0.1485 | 0.03513 | <b>0.59</b> ± 0.057   | 0.00787 | <b>0.652</b> ± 0.0694 | 0.00579 | TGCTTACTATAAAAATATTAGAAATGGCAAAGAAAGTGCCCTTAAGCATG    |
| plasmid_lp36 | 24297 | BB_K39   | <b>1.483</b> ± 0.8336 | 0.058176 | <b>1.359</b> ± 0.8697 | 0.59236 | <b>0.763</b> ± 0.5825 | 0.05218 | <b>0.795</b> ± 0.6833 | 0.05533 | AGCATATGCTACTTATCCCTGTCTTAAAGATTATCTTTAAGTGCCTCGTCA   |
| plasmid_lp36 | 24522 | BB_K39   | <b>1.016</b> ± 1.0032 | 0.983765 | <b>1.1</b> ± 1.0953   | 0.73436 | <b>0.764</b> ± 1.0005 | 0.80203 | <b>1.041</b> ± 1.1666 | 0.95051 | TCGCCAAAAAGGCTTTCTACTTTTTCCATTAAACCCAGTTACACACTCTTA   |
| plasmid_lp36 | 24785 | IG 1280  | <b>0.757</b> ± 0.6539 | 0.624905 | <b>0.693</b> ± 0.5621 | 0.635   | <b>0.466</b> ± 0.4422 | 0.35484 | <b>0.534</b> ± 0.4575 | 0.46906 | GTTTTAGGGGTTCTTATGCTAGTTGGCTATGAGCTATCAGAGAAGTATGTA   |
| plasmid_lp36 | 24833 | IG 1281  | <b>0.781</b> ± 0.3462 | 0.252072 | <b>0.971</b> ± 0.9271 | 0.9436  | <b>0.591</b> ± 0.3796 | 0.1185  | <b>0.904</b> ± 0.4695 | 0.57478 | CTAGTTCCTGATAGCTCATAGCAAACTAGACATAAGAACCCCTAAAACTA    |
| plasmid_lp36 | 24947 | IG 1282  | <b>1.734</b> ± 1.0743 | 0.177607 | <b>2.607</b> ± 3.4634 | 0.41911 | <b>1.125</b> ± 1.1189 | 0.81371 | <b>1.836</b> ± 1.43   | 0.04212 | CTAATACTAAAAGATGACTTGAAGAAGACTTTGATTTTGTACTAGCTTTG    |
| plasmid_lp36 | 25003 | IG 1283  | <b>0.941</b> ± 0.5093 | 0.704865 | <b>1.535</b> ± 1.2238 | 0.38715 | <b>0.827</b> ± 0.3109 | 0.39339 | <b>1.058</b> ± 0.7776 | 0.78353 | GGTTGTCAAAAGCTAGTGACAAAATCAAAGTCTTTCTAAGTCATCTTTAG    |
| plasmid_lp36 | 25064 | IG 1284  | <b>2.044</b> ± 2.1274 | 0.395501 | <b>2.91</b> ± 3.4011  | 0.27374 | <b>1.447</b> ± 1.5194 | 0.27968 | <b>1.759</b> ± 2.5224 | 0.40763 | GATAACAAAAGTAGTTAAATTGCAGTAAAGGAGGGTTATATGAGTAAATTTT  |
| plasmid_lp36 | 25376 | BB_K40   | <b>0.944</b> ± 0.4996 | 0.269367 | <b>1.179</b> ± 0.91   | 0.56487 | <b>0.626</b> ± 0.279  | 0.18578 | <b>0.753</b> ± 0.3007 | 0.236   | AAGACAGTAAGAAGTGAAGTAAAGGTTAGATAGTAAAGTATAGTAAAGA     |
| plasmid_lp36 | 25591 | BB_K40   | <b>1.747</b> ± 0.7519 | 0.216858 | <b>1.749</b> ± 0.4295 | 0.06652 | <b>1.175</b> ± 0.185  | 0.10667 | <b>1.559</b> ± 0.5736 | 0.21783 | AAATGGATATCAAGCTTTTTATATGCGAGTTGTTCTCATTCTTATTTTC     |
| plasmid_lp36 | 25669 | IG 1285  | <b>0.973</b> ± 0.2812 | 0.057936 | <b>1.03</b> ± 0.5725  | 0.89821 | <b>0.662</b> ± 0.1679 | 0.15015 | <b>0.97</b> ± 0.2968  | 0.73008 | AGTGTACTTATCCATTTTACCATTAATTTAATCTTAAACAGTATTTATGTA   |
| plasmid_lp36 | 25765 | IG 1286  | <b>2.510</b> ± 0.8588 | 0.003157 | <b>3.905</b> ± 3.8927 | 0.31105 | <b>2.231</b> ± 2.6721 | 0.49615 | <b>2.166</b> ± 1.9986 | 0.38955 | TCTTAGGCTTTTTAAAATTATCTTGCCCTTAGACCATTCTTGATCATA      |
| plasmid_lp36 | 25774 | IG 1287  | <b>0.677</b> ± 0.6784 | 0.360209 | <b>0.32</b> ± 0.4742  | 0.40769 | <b>1.07</b> ± 1.2323  | 0.76138 | <b>0.87</b> ± 0.9446  | 0.55874 | CTTAGGCTTTTTAAAATAAGAAGATATTGGTGTGCTAGTTATATTGATTT    |
| plasmid_lp36 | 25813 | BB_K41   | <b>0.813</b> ± 0.5307 | 0.541661 | <b>2.071</b> ± 1.3832 | 0.03845 | <b>0.852</b> ± 0.5793 | 0.73644 | <b>1.307</b> ± 0.9045 | 0.09998 | ACTAGCACACAATATCTTCTTATTTTTAAAAAGCCCTAAGTACTTGTATCT   |
| plasmid_lp36 | 25853 | BB_K41   | <b>1.586</b> ± 1.4675 | 0.501858 | <b>1.595</b> ± 1.9611 | 0.2805  | <b>0.611</b> ± 0.6751 | 0.43415 | <b>0.535</b> ± 0.8889 | 0.64795 | GTAGCAAGGCTACCTTTACTATCATCTTCATATAAATTAAGTTTTTGTGT    |
| plasmid_lp36 | 25862 | BB_K41   | <b>1.380</b> ± 0.6847 | 0.199055 | <b>1.663</b> ± 1.2423 | 0.33632 | <b>0.817</b> ± 0.2819 | 0.17827 | <b>1.057</b> ± 0.3311 | 0.78262 | GCCTTGTACTATACTTAATGACTTAGAAAAGGATGCCAAATCAATATAAC    |
| plasmid_lp36 | 25908 | BB_K41   | <b>0.574</b> ± 0.6193 | 0.46354  | <b>0.891</b> ± 0.8977 | 0.88244 | <b>0.645</b> ± 0.4144 | 0.31668 | <b>1.133</b> ± 1.1509 | 0.8507  | GTTTAAATGATAAGATAAGCTTAGACTACCTTCTCTTAGTAATCCCATCAA   |
| plasmid_lp36 | 26123 | BB_K41   | <b>0.365</b> ± 0.4265 | 0.418517 | <b>1.236</b> ± 1.2845 | 0.61433 | <b>0.701</b> ± 0.8658 | 0.57949 | <b>1.06</b> ± 1.634   | 0.95996 | AGACTACTAAGCTTTGTAAATCTCATAAATAACATCTTTAAGAGATTTGTTG  |
| plasmid_lp36 | 26276 | BB_K41   | <b>1.001</b> ± 0.4572 | 0.998153 | <b>1.211</b> ± 1.461  | 0.773   | <b>0.769</b> ± 0.663  | 0.39869 | <b>0.807</b> ± 0.4201 | 0.57515 | AGATGGCTGGGCTTGAGGCTTAGATCATTTCCCAATTAATAAAGATCTTG    |
| plasmid_lp36 | 26452 | IG 1288  | <b>1.245</b> ± 0.6933 | 0.156025 | <b>2.307</b> ± 2.6584 | 0.39224 | <b>0.941</b> ± 0.4985 | 0.63944 | <b>1.065</b> ± 0.777  | 0.70184 | GCTTCAAGAGTTTCTTTAATAAGAGCATCTTTTTGAGTCAAGTTTATGA     |
| plasmid_lp36 | 26932 | BB_K42a  | <b>1.160</b> ± 0.4457 | 0.416591 | <b>2.061</b> ± 1.6693 | 0.26662 | <b>0.986</b> ± 0.4383 | 0.87029 | <b>1.292</b> ± 0.6854 | 0.1372  | GTTTATGATTCTAGCAATTATGCTCCTTTATTAGAAAATCAACTACTGGC    |
| plasmid_lp36 | 27034 | BB_K42a  | <b>1.061</b> ± 0.5511 | 0.286491 | <b>1.776</b> ± 1.417  | 0.27967 | <b>0.869</b> ± 0.3999 | 0.36404 | <b>1.19</b> ± 0.6732  | 0.3456  | TATATTGGTAAAAAATAAGTTTGTAAAGCTTTATAAGCATCTCTTATAAGTA  |
| plasmid_lp36 | 27078 | BB_K42a  | <b>0.448</b> ± 0.2682 | 0.135637 | <b>1.121</b> ± 0.8102 | 0.14737 | <b>0.599</b> ± 0.3074 | 0.26247 | <b>0.806</b> ± 0.5219 | 0.62492 | TAGGAGATGCTTATAAAGCTTAAACAACTTATTTTTACCAATATATATATC   |
| plasmid_lp36 | 27134 | IG 1289  | <b>0.841</b> ± 0.2768 | 0.192931 | <b>1.272</b> ± 0.6083 | 0.33589 | <b>0.727</b> ± 0.1635 | 0.18574 | <b>0.787</b> ± 0.1884 | 0.10173 | GTAACAATATAGTCGTAAGTACTAGAAAAGACTTTAATTTTTAAAGAAATAA  |
| plasmid_lp36 | 27233 | IG 1290  | <b>0.822</b> ± 0.5669 | 0.723512 | <b>0.951</b> ± 0.8269 | 0.83909 | <b>0.481</b> ± 0.413  | 0.21026 | <b>0.295</b> ± 0.3072 | 0.11494 | AATGAATTACTTTACAGGGAGCTTAAAATATTTATCTTAGAAAATAATGGA   |
| plasmid_lp36 | 27315 | IG 1291  | <b>2.140</b> ± 1.2838 | 0.073167 | <b>0.957</b> ± 0.5242 | 0.9121  | <b>1.175</b> ± 0.5108 | 0.25541 | <b>1.361</b> ± 0.7621 | 0.36181 | TTTTTGTAAAAATCCAAAAGCTTCTTTATTTAAGTAAGTGTCATGCTT      |
| plasmid_lp36 | 27399 | BB_K45   | <b>1.101</b> ± 0.5777 | 0.822927 | <b>1.953</b> ± 1.0159 | 0.21937 | <b>1.099</b> ± 0.5498 | 0.66834 | <b>1.493</b> ± 1.1274 | 0.42875 | CTTAAAGCAGCTTCATGTGCTTATTTAAGTCTTAACTCTTAACTTTATTTGCT |
| plasmid_lp36 | 27542 | BB_K45   | <b>0.003</b> ± 0.005  | 0.165318 | <b>0.125</b> ± 0.2313 | 0.22628 | <b>0.438</b> ± 0.5313 | 0.17746 | <b>0.699</b> ± 0.86   | 0.52762 | TATGAATGATGCTAAAGAAGCAATGGGCGAGGCTAAAGTTAGCCTTAAGAC   |
| plasmid_lp36 | 27687 | BB_K45   | <b>0.874</b> ± 0.7198 | 0.295257 | <b>1.492</b> ± 1.5554 | 0.39732 | <b>0.715</b> ± 0.5084 | 0.1622  | <b>0.869</b> ± 0.5969 | 0.39239 | ACTCTAATTATTCAGATGCAGTAAGTGCCCTTAAAAGTTCTAAGCAGGATT   |
| plasmid_lp36 | 27690 | BB_K45   | <b>1.441</b> ± 0.9431 | 0.153902 | <b>1.792</b> ± 1.4325 | 0.17399 | <b>0.977</b> ± 0.6218 | 0.9587  | <b>1.435</b> ± 0.8292 | 0.43641 | GCATAAGCATGGCTGCTACTACTTGGCAATAGCTTGATCAAGTTTAGGC     |
| plasmid_lp36 | 27705 | BB_K45   | <b>1.107</b> ± 0.6285 | 0.551511 | <b>1.252</b> ± 1.2362 | 0.66965 | <b>0.564</b> ± 0.3132 | 0.21103 | <b>1.117</b> ± 0.3357 | 0.5924  | GCAGCCATGCTTATGCTAACTCAATTTATCAGATGCAGTAAGTGCCCTTAA   |
| plasmid_lp36 | 27852 | BB_K45   | <b>1.736</b> ± 0.8904 | 0.068883 | <b>2.075</b> ± 1.8804 | 0.27256 | <b>1.357</b> ± 0.7646 | 0.26356 | <b>1.363</b> ± 0.6089 | 0.26101 | CAGATTTAGAAAACAAATAAGTCAAGACTTAATAATAAAAAAGTAAAGTTG   |
| plasmid_lp36 | 28178 | BB_K45   | <b>0.996</b> ± 0.9719 | 0.991517 | <b>0.14</b> ± 0.164   | 0.19718 | <b>0.647</b> ± 0.5664 | 0.39708 | <b>0.89</b> ± 0.9311  | 0.3534  | TAGCTTGAAGAGATAAAGCTTAAAATAAACTGAATATTAATACTTAAAT     |

|              |       |         |                                |                               |                               |                               |                                                       |
|--------------|-------|---------|--------------------------------|-------------------------------|-------------------------------|-------------------------------|-------------------------------------------------------|
| plasmid_lp36 | 28248 | BB_K45  | <b>1.086</b> ± 0.439 0.641341  | <b>1.215</b> ± 0.3575 0.28721 | <b>0.904</b> ± 0.2597 0.64676 | <b>1.162</b> ± 0.2063 0.3022  | ACTTTATGCAAAAATAGAGTATTATTGTAATACAATATCATATTATTACAT   |
| plasmid_lp36 | 28332 | IG 1292 | <b>1.529</b> ± 1.4573 0.429876 | <b>1.957</b> ± 1.7606 0.26624 | <b>0.861</b> ± 0.8885 0.72346 | <b>1.217</b> ± 1.1299 0.74715 | ACATATAAECTCATATTTCTTGATTACTAATAATAAATGTAATATAATGATAT |
| plasmid_lp36 | 28445 | BB_K46  | <b>0.956</b> ± 0.8739 0.936696 | <b>1.594</b> ± 1.7316 0.66278 | <b>0.449</b> ± 0.6848 0.51747 | <b>1.332</b> ± 1.4189 0.76656 | TCAGGCAAAATGCAGACTTTGAAGAGCTAAATAAAGCATATGAAGCTGCCTTA |
| plasmid_lp36 | 28533 | BB_K46  | <b>0.989</b> ± 0.508 0.917376  | <b>1.453</b> ± 1.2747 0.46695 | <b>0.711</b> ± 0.3432 0.3894  | <b>0.99</b> ± 0.5545 0.97222  | TAAATGACGCTAAAGATGCAATGGAGAGCCAAAAGGATGCTAGATAACCG    |
| plasmid_lp36 | 28852 | BB_K46  | <b>1.181</b> ± 0.6661 0.3654   | <b>1.228</b> ± 0.823 0.46682  | <b>0.77</b> ± 0.3271 0.16982  | <b>0.817</b> ± 0.4104 0.04527 | GTCTAGCGCACTCTCTGTAGAAGATTCAATTTCTTTCATAATATTACTAT    |
| plasmid_lp36 | 29013 | BB_K46  | <b>1.177</b> ± 0.3837 0.260266 | <b>1.507</b> ± 0.8432 0.45431 | <b>0.918</b> ± 0.4233 0.74485 | <b>0.946</b> ± 0.4871 0.78375 | TGAAACAAAACATAGACAAAATCATTTAGTTGTTGAGATATGCAAAAATG    |
| plasmid_lp36 | 29095 | BB_K46  | <b>0.537</b> ± 1.0585 0.697038 | <b>4.132</b> ± 6.8012 0.46971 | <b>1.127</b> ± 1.4615 0.91763 | <b>1.404</b> ± 1.4722 0.40891 | GACAACAACAAGTCTTTAATACTTTAGGAAGCAGCAATGAGAGTAGAAGT    |
| plasmid_lp36 | 29213 | IG 1293 | <b>1.329</b> ± 0.6672 0.518324 | <b>1.572</b> ± 0.7199 0.20137 | <b>0.695</b> ± 0.622 0.51996  | <b>1.029</b> ± 0.6651 0.94686 | GATGAATTTAATGCTAAATTTATTTTATCCACTTTAGTTTCAATTCC       |
| plasmid_lp36 | 29299 | IG 1294 | <b>0.643</b> ± 0.555 0.42699   | <b>0.934</b> ± 1.359 0.94436  | <b>0.24</b> ± 0.2302 0.23643  | <b>0.874</b> ± 0.969 0.87979  | TTTTCTATTTTTATAAATGTGATATATTTATTTTTTAAGAAATAAAGCATA   |
| plasmid_lp36 | 29402 | IG 1295 | <b>1.444</b> ± 1.2473 0.650687 | <b>1.921</b> ± 1.8833 0.36181 | <b>0.672</b> ± 0.7659 0.34997 | <b>1.52</b> ± 1.5686 0.49741  | TATAAGCTTTTCTAGTAAAGATGGGATTATATATGAGTAGAGATATTAAG    |
| plasmid_lp36 | 29403 | IG 1296 | <b>3.223</b> ± 2.9664 0.25779  | <b>0.567</b> ± 0.7438 0.53167 | <b>1.059</b> ± 1.1522 0.91868 | <b>2.44</b> ± 2.7944 0.4672   | TATATCGGCTTACCTAAATTAACATTTTACTTCCCTTCTGCTTTACAAG     |
| plasmid_lp36 | 29428 | IG 1297 | <b>1.159</b> ± 0.2367 0.142795 | <b>1.362</b> ± 0.3077 0.22503 | <b>0.855</b> ± 0.1683 0.37923 | <b>1.075</b> ± 0.2787 0.24924 | ATCCCATCTTTACTAGAAAAGCTTATATCTCGGCTTACCTAAATTAECTAT   |
| plasmid_lp36 | 29493 | BB_K47  | <b>1.344</b> ± 0.6407 0.396328 | <b>2.1</b> ± 1.0117 0.36987   | <b>1.133</b> ± 0.8292 0.75538 | <b>1.65</b> ± 0.7407 0.13905  | TTTTCTATTTCTTTTTGCAAGAATTTCCCTGTGTAAGATAATCAATAGCT    |
| plasmid_lp36 | 29552 | BB_K47  | <b>0.823</b> ± 0.4638 0.420706 | <b>0.523</b> ± 0.4362 0.19823 | <b>0.64</b> ± 0.1818 0.19517  | <b>1.324</b> ± 0.4692 0.06064 | TACACAAAAAGCTATTGATTATCTTCAACAGGGAATTTCTGCAAAAAAGA    |
| plasmid_lp36 | 29670 | BB_K47  | <b>1.356</b> ± 0.3517 0.249864 | <b>1.736</b> ± 1.2955 0.46183 | <b>0.61</b> ± 0.2006 0.2105   | <b>1.167</b> ± 0.4552 0.63048 | AAAGACTATACAATGGCAATTCATACCGGTTGCGTGGCAGTTTTACCGGAC   |
| plasmid_lp36 | 29673 | BB_K47  | <b>0.958</b> ± 0.7028 0.9307   | <b>0.335</b> ± 0.4483 0.20307 | <b>0.476</b> ± 0.5864 0.52509 | <b>0.957</b> ± 1.1699 0.96885 | TAAATAGATTCTGCTAGTTTTATCTTAGCCTCATCTAGCATGCCTTTAGCA   |
| plasmid_lp36 | 30012 | BB_K47  | <b>1.121</b> ± 0.6141 0.648407 | <b>1.265</b> ± 0.935 0.55049  | <b>0.81</b> ± 0.3691 0.50053  | <b>1.038</b> ± 0.6399 0.79717 | TTCTTCAGAAGAAGAAATTAAGCTAACTTAGATGAATTTGCACAGAAG      |
| plasmid_lp36 | 30139 | BB_K47  | <b>1.157</b> ± 0.7394 0.403102 | <b>1.85</b> ± 1.9557 0.40584  | <b>0.736</b> ± 0.4167 0.06318 | <b>1.011</b> ± 0.6534 0.94318 | CAAAATGACTCGCATGCTCAAAATAATGTAAGATGGAAGAAAATAAATCA    |
| plasmid_lp36 | 30142 | BB_K47  | <b>1.082</b> ± 1.2397 0.823599 | <b>0.587</b> ± 0.6182 0.47877 | <b>0.957</b> ± 1.2682 0.96866 | <b>1.159</b> ± 1.457 0.80384  | TTATTGCTGGACTTGAATTTGGTAGGGATTCTTTATTATTAGCACCAGGAT   |
| plasmid_lp36 | 30183 | BB_K47  | <b>1.320</b> ± 1.5561 0.786588 | <b>0.888</b> ± 1.2156 0.84047 | <b>0</b> ± 0 0.03866          | <b>0.662</b> ± 0.6576 0.37317 | GCACCAGGATCATCTGACATATGTTGATTAGAACCTACTTGAAGATTGGA    |
| plasmid_lp36 | 30226 | BB_K47  | <b>1.255</b> ± 0.3058 0.044776 | <b>1.144</b> ± 0.426 0.67279  | <b>0.845</b> ± 0.2475 0.24964 | <b>1.046</b> ± 0.3378 0.67585 | AGATTGGATCATAAGTTTTTTTATTTGATGATGTAACGCTTTTAGGAGATT   |
| plasmid_lp36 | 30312 | BB_K47  | <b>1.318</b> ± 0.6915 0.243501 | <b>1.792</b> ± 1.3143 0.29009 | <b>0.901</b> ± 0.2629 0.60434 | <b>1.163</b> ± 0.4448 0.06098 | GTAGTATTTTTTATTTTCTTGATGATCTTTAATGCTAATGCAAACTGTCT    |
| plasmid_lp36 | 30361 | BB_K47  | <b>1.158</b> ± 0.5175 0.17455  | <b>1.892</b> ± 1.0652 0.14921 | <b>0.948</b> ± 0.3109 0.66756 | <b>1.165</b> ± 0.417 0.16172  | GAACAGTTTGCATTAGCATTAAAGATCATCAAGAAAATAAAAACTACT      |
| plasmid_lp36 | 30544 | IG 1298 | <b>2.011</b> ± 1.1632 0.261901 | <b>1.384</b> ± 0.5475 0.27566 | <b>1.073</b> ± 0.612 0.81565  | <b>1.065</b> ± 0.6138 0.88204 | TATTATAATTATTATTAATATAGATATTATTGCTATATAAGTACATAACA    |
| plasmid_lp36 | 30615 | IG 1299 | <b>1.464</b> ± 0.7568 0.102791 | <b>1.738</b> ± 0.669 0.17582  | <b>0.78</b> ± 0.3493 0.50659  | <b>1.621</b> ± 0.7375 0.17051 | AAGTTAAGAGAAAATAAAGTGTGTTTAGAAAAAGAGTATTATAAACAAAG    |
| plasmid_lp36 | 30723 | BB_K48  | <b>1.276</b> ± 1.3532 0.790579 | <b>0.348</b> ± 0.6395 0.3656  | <b>0.89</b> ± 0.6976 0.68581  | <b>2.02</b> ± 1.8995 0.22911  | GATAAGTAAAAGTAAAATATTAAGACAAGCCAGACAATACTTTTAGTGAGT   |
| plasmid_lp36 | 30751 | BB_K48  | <b>0.375</b> ± 0.6217 0.348118 | <b>0.32</b> ± 0.3295 0.14432  | <b>0.163</b> ± 0.2465 0.00998 | <b>0.236</b> ± 0.4162 0.16384 | TATAAAAAAATTGCAAGATATGGACTCTAGATAAAGTAAAAGTAAAATTTAA  |
| plasmid_lp36 | 30777 | BB_K48  | <b>1.328</b> ± 0.7323 0.421201 | <b>1.771</b> ± 1.5229 0.42878 | <b>0.828</b> ± 0.3904 0.31897 | <b>1.237</b> ± 0.5839 0.42493 | AAGACTTCAAGAGTTAAATGATATATAAAAAATTGCAAGATATGGACT      |
| plasmid_lp36 | 30902 | BB_K48  | <b>1.027</b> ± 0.843 0.893451  | <b>1.335</b> ± 0.956 0.23314  | <b>0.616</b> ± 0.3642 0.13645 | <b>0.731</b> ± 0.5799 0.03512 | GTAGCTCTCATGCTTGAAGCATTGCTATTACTTAATGCCTCTTCTAAAGC    |
| plasmid_lp36 | 31078 | BB_K48  | <b>1.224</b> ± 0.7699 0.484972 | <b>0.843</b> ± 0.9446 0.49373 | <b>1.271</b> ± 0.6755 0.55651 | <b>1.24</b> ± 0.6811 0.44164  | GGCTAGGCAATAAGGCTAAGTTAGCTTTACTAGATCCACACCTCTTCTAG    |
| plasmid_lp36 | 31263 | BB_K48  | <b>0.563</b> ± 0.9431 0.031126 | <b>0.762</b> ± 1.0534 0.34783 | <b>0.362</b> ± 0.4528 0.38355 | <b>0.825</b> ± 0.9694 0.82844 | GCTTCACTAGCTTCATTATCTGGATATTAACCTGTAGAGATGGTTGCTG     |
| plasmid_lp36 | 31272 | BB_K48  | <b>1.730</b> ± 1.492 0.166024  | <b>2.173</b> ± 2.4025 0.32063 | <b>1.129</b> ± 0.6911 0.72432 | <b>2.117</b> ± 1.5257 0.01125 | GCTTCATTATCTGGATATTAACCTGTAGAGTATGGTTGCTGCTACTATTA    |
| plasmid_lp36 | 31290 | BB_K48  | <b>0.442</b> ± 0.3683 0.28736  | <b>0.391</b> ± 0.4162 0.01268 | <b>0.348</b> ± 0.4511 0.25764 | <b>0.777</b> ± 0.4063 0.17969 | ATATCCAAGATAATGAAGCTAGTGAAGCTAGAAACATTATGACGGAAATTG   |
| plasmid_lp36 | 31579 | BB_K48  | <b>0.822</b> ± 0.8402 0.705797 | <b>1.26</b> ± 1.2975 0.72061  | <b>0.754</b> ± 0.3754 0.01335 | <b>0.719</b> ± 0.5447 0.16374 | AATTCACCTTATTACTTCTCTTTAGAATCTGATATTCTTATATAAAAAAT    |
| plasmid_lp36 | 31763 | IG 1300 | <b>1.235</b> ± 1.0423 0.6858   | <b>1.833</b> ± 1.902 0.56023  | <b>0.631</b> ± 0.5092 0.16225 | <b>0.431</b> ± 0.4049 0.36961 | GAAAAAATTATACAGCTTACCTAAATTAECTATTTCTACTCTCTACTTGCC   |
| plasmid_lp36 | 31835 | BB_K49  | <b>1.570</b> ± 2.1339 0.221981 | <b>0.639</b> ± 0.8853 0.59084 | <b>0.731</b> ± 1.1034 0.55648 | <b>0.481</b> ± 0.7707 0.37043 | AAGCTTTAAAACCTCCAGATGAGGCTTAGTTTATTTTAAATATCTCTAATCA  |
| plasmid_lp36 | 31902 | BB_K49  | <b>1.073</b> ± 0.2378 0.375945 | <b>1.587</b> ± 0.9391 0.32256 | <b>0.784</b> ± 0.3097 0.05469 | <b>1.054</b> ± 0.429 0.79837  | TATGAAAAATGCTATTAGTTTTCTCAATATGGAATTTCTGCAGAAAAAGA    |
| plasmid_lp36 | 31905 | BB_K49  | <b>0.921</b> ± 0.4938 0.57225  | <b>1.484</b> ± 1.2265 0.29029 | <b>0.824</b> ± 0.4787 0.1622  | <b>0.981</b> ± 0.6054 0.67436 | TTTAATGCATTGAGTAGCAAGATCTATAGCTCTTTTGTCAAAATCTTGAT    |
| plasmid_lp36 | 31931 | BB_K49  | <b>0.581</b> ± 0.5927 0.205787 | <b>1.164</b> ± 1.1485 0.39238 | <b>0.637</b> ± 0.667 0.31131  | <b>1.031</b> ± 1.0626 0.87456 | TAGCTCTTTTGTCAAATCTTGATATTGCGTTTGTAAAAATTAAGTGCCTA    |
| plasmid_lp36 | 32041 | BB_K49  | <b>0.650</b> ± 0.4768 0.271838 | <b>0.79</b> ± 0.7126 0.64201  | <b>1.171</b> ± 0.5666 0.67904 | <b>1.458</b> ± 0.6347 0.16723 | TCTGAGCCACATCTAGCATATCTTTAGACAGCCAAAAGGATGCTTGTCT     |
| plasmid_lp36 | 32260 | BB_K49  | <b>1.124</b> ± 0.6113 0.595969 | <b>1.896</b> ± 1.4673 0.24663 | <b>0.719</b> ± 0.3709 0.14593 | <b>0.718</b> ± 0.4964 0.08239 | ATTCTGAAAATAACTTAAACAATACACTCCTTGAGTTTAAAGAATTTTCATC  |
| plasmid_lp36 | 32498 | BB_K49  | <b>1.169</b> ± 0.7639 0.39757  | <b>1.814</b> ± 1.9049 0.41342 | <b>0.722</b> ± 0.4055 0.04784 | <b>0.998</b> ± 0.6394 0.98674 | CAAAATGACTCGCATGCTCAAATAATGTAAGATGGAAGAAAATAAATCA     |
| plasmid_lp36 | 32542 | BB_K49  | <b>1.218</b> ± 1.3582 0.84568  | <b>1.003</b> ± 1.4582 0.9953  | <b>0.032</b> ± 0.0418 0.12114 | <b>0.682</b> ± 0.7396 0.33067 | GCACCAGGATCATCTGACATATGTTGATTAGAACCTACTTGAAGATTGGA    |
| plasmid_lp36 | 32585 | BB_K49  | <b>1.285</b> ± 0.357 0.067855  | <b>1.188</b> ± 0.4853 0.62476 | <b>0.871</b> ± 0.2749 0.33516 | <b>1.073</b> ± 0.3889 0.58922 | AGATTGGATCATAAGTTTTTTTATTTGATGATGTAACGCTTTTAGGAGATT   |
| plasmid_lp36 | 32671 | BB_K49  | <b>1.292</b> ± 0.651 0.28273   | <b>1.738</b> ± 1.2525 0.31606 | <b>0.877</b> ± 0.2239 0.45428 | <b>1.16</b> ± 0.4158 0.14649  | GTAGTATTTTTTATTTTCTTGATGATCTTTAATGCTAATGCAAACTGTCT    |
| plasmid_lp36 | 32720 | BB_K49  | <b>1.087</b> ± 0.4635 0.318756 | <b>1.915</b> ± 0.9859 0.12882 | <b>0.944</b> ± 0.2839 0.63339 | <b>1.19</b> ± 0.3724 0.11192  | GAACAGTTTGCATTAGCATTAAAGATCATCAAGAAAATAAAAACTACT      |
| plasmid_lp36 | 32831 | IG 1301 | <b>1.690</b> ± 1.1461 0.060567 | <b>1.558</b> ± 1.5514 0.50087 | <b>0.8</b> ± 0.5296 0.54617   | <b>1.37</b> ± 0.9778 0.35571  | TATTTCTTTTAAATAAACTTTGTTATGTAATATATGGAATAAATATC       |
| plasmid_lp36 | 33116 | BB_K50  | <b>1.750</b> ± 0.4932 0.05221  | <b>1.691</b> ± 0.6213 0.02505 | <b>1.474</b> ± 0.7538 0.45151 | <b>1.306</b> ± 0.4923 0.46388 | TATCATTTAACTCTGAAAGCTTATTTGCTTAGTATATTTTCATTA         |
| plasmid_lp36 | 33139 | BB_K50  | <b>1.238</b> ± 0.8779 0.50936  | <b>1.657</b> ± 1.4896 0.40781 | <b>0.705</b> ± 0.3754 0.00125 | <b>1.121</b> ± 0.6477 0.49295 | AGGACTTTCAAGATTAAATGATATATAAAAAATTGCAAGATATGGACT      |

|              |       |         |                                |                               |                               |                               |                                                       |
|--------------|-------|---------|--------------------------------|-------------------------------|-------------------------------|-------------------------------|-------------------------------------------------------|
| plasmid_lp36 | 33232 | BB_K50  | <b>1.467</b> ± 1.4969 0.689801 | <b>1.336</b> ± 1.2215 0.6629  | <b>0.344</b> ± 0.4999 0.07254 | <b>1.459</b> ± 1.1982 0.58814 | ATGCTAATGATGCAATGGAGAGTGCTAAAAAGTTTGTAGAGGTTGCTAAGA   |
| plasmid_lp36 | 33235 | BB_K50  | <b>1.246</b> ± 0.5692 0.166695 | <b>1.451</b> ± 1.2212 0.43928 | <b>0.812</b> ± 0.2708 0.39149 | <b>1.163</b> ± 0.4672 0.18176 | TTTTATCCGGTAATGGTAAAGATAATTGTACCCCTAAAAATGAGGTATATCT  |
| plasmid_lp36 | 33396 | BB_K50  | <b>1.512</b> ± 0.8239 0.349518 | <b>1.483</b> ± 0.8258 0.39908 | <b>0.508</b> ± 0.1762 0.07202 | <b>0.792</b> ± 0.7306 0.5705  | TGCCTCTTAAATGTTTGTCTATACTGATGCAATGCTGCTTTAGCAAAAGC    |
| plasmid_lp36 | 33403 | BB_K50  | <b>0.633</b> ± 0.6854 0.086756 | <b>0.299</b> ± 0.2144 0.17546 | <b>0.278</b> ± 0.3062 0.08965 | <b>0.419</b> ± 0.6248 0.20727 | GTAGTTATGCCTCTCTTAAGTTGGTAAATGCTAAATGCTAAATGCTGTAG    |
| plasmid_lp36 | 33604 | BB_K50  | <b>0.729</b> ± 0.3782 0.440898 | <b>0.683</b> ± 0.5458 0.2682  | <b>0.672</b> ± 0.5797 0.58692 | <b>0.511</b> ± 0.3445 0.25492 | TACAAAAAGCTTCTACCTCTTTAGAAGAAGCTGAGAAAGTAAATGCAGCTT   |
| plasmid_lp36 | 33787 | BB_K50  | <b>0.968</b> ± 0.9105 0.935673 | <b>1.096</b> ± 1.7305 0.94386 | <b>1.012</b> ± 1.2593 0.98886 | <b>1.01</b> ± 0.9442 0.98923  | TTTTGTGTGATCATTCTGTTTTGATTACTTCTTTTACCCCAATTTCT       |
| plasmid_lp36 | 34079 | BB_K50  | <b>1.124</b> ± 0.1725 0.424899 | <b>0.952</b> ± 0.4637 0.86861 | <b>0.817</b> ± 0.0929 0.15355 | <b>1.136</b> ± 0.0898 0.11469 | ATGAATTTAATAATAAAGTGATGTTGATATCCAGTTTATTTCTAGCTTT     |
| plasmid_lp36 | 34081 | IG 1302 | <b>1.027</b> ± 1.1037 0.948319 | <b>0.287</b> ± 0.369 0.28472  | <b>0.785</b> ± 0.4496 0.42014 | <b>0.844</b> ± 0.558 0.27197  | TAATGAATTTAATAATAAAGTGATGTTGATATCCAGTTTATTTCTAGCT     |
| plasmid_lp36 | 34137 | IG 1303 | <b>0.709</b> ± 0.4736 0.318172 | <b>1.208</b> ± 1.0969 0.75839 | <b>1.077</b> ± 0.7661 0.38915 | <b>0.813</b> ± 0.4903 0.64822 | TATGTGATATAATGATAAAATTTCTAATAATATTTCTATTTTATAGATAGAGG |
| plasmid_lp36 | 34754 | BB_K52  | <b>0.670</b> ± 0.5503 0.56384  | <b>0.841</b> ± 0.6826 0.75401 | <b>0.458</b> ± 0.386 0.2735   | <b>0.651</b> ± 0.5637 0.36047 | TATGCCTGCATATCTACTATAAAAGATAAAAGAAACCGATAAATATAAAAC   |
| plasmid_lp36 | 34992 | BB_K52  | <b>1.179</b> ± 0.7483 0.394775 | <b>1.529</b> ± 1.2227 0.31951 | <b>0.751</b> ± 0.533 0.29973  | <b>0.905</b> ± 0.4144 0.76193 | AGATAATAGCATTGAATCAACTAAAGAGTTTGAAAAAATACGAAATAA      |
| plasmid_lp36 | 35088 | BB_K52  | <b>1.203</b> ± 0.377 0.386388  | <b>2.075</b> ± 1.2146 0.24852 | <b>0.447</b> ± 0.1678 0.02379 | <b>0.974</b> ± 0.3736 0.89956 | TTTTTCCACCATTCGATTCAAACTTTTTAGTTATAATATAGCATTA        |
| plasmid_lp36 | 35090 | BB_K52  | <b>1.308</b> ± 0.5819 0.277808 | <b>1.546</b> ± 0.4829 0.04809 | <b>0.893</b> ± 0.27 0.15363   | <b>1.258</b> ± 0.6544 0.41849 | TATTTTTTCCACCATTCGATTCAAACTTTTTAGTTATAATATAGCAT       |
| plasmid_lp36 | 35093 | BB_K52  | <b>1.170</b> ± 0.433 0.369635  | <b>1.592</b> ± 0.911 0.18997  | <b>0.974</b> ± 0.3474 0.88721 | <b>1.232</b> ± 0.5052 0.1798  | AGAGTACCTAAGTTCTCTAAGACTCTCAATTAATTTGTTATTTTATCTTT    |
| plasmid_lp36 | 35180 | BB_K52  | <b>1.543</b> ± 0.4454 0.136957 | <b>2.366</b> ± 1.3227 0.16592 | <b>1.1</b> ± 0.4061 0.75222   | <b>1.105</b> ± 0.8283 0.80682 | TGTTACATGGGCAAAATCTGGTGACTTAAGGGTTTTAAAAAGATAAAAAATAA |
| plasmid_lp36 | 35218 | BB_K52  | <b>1.217</b> ± 1.4859 0.615975 | <b>1.163</b> ± 1.2002 0.8661  | <b>0.852</b> ± 0.8587 0.81057 | <b>1.253</b> ± 1.1814 0.55886 | AAAGAGGGGGACGTGCTTGAATTACTTGACAGTGTTATGTTACATGGGCA    |
| plasmid_lp36 | 35787 | IG 1304 | <b>1.267</b> ± 0.6037 0.259544 | <b>2.009</b> ± 0.9646 0.09395 | <b>0.897</b> ± 0.409 0.61302  | <b>0.999</b> ± 0.6187 0.99368 | AATGTTTAATAAAATAGTGCTTAGATAAACTTGATATTTACAACAGATTA    |
| plasmid_lp36 | 35913 | BB_K53  | <b>0.930</b> ± 0.7327 0.833799 | <b>1.361</b> ± 1.2901 0.09453 | <b>0.663</b> ± 0.5068 0.41027 | <b>0.733</b> ± 0.678 0.64826  | TGGGTTGTTATTTGCCTGATAATCAGGAACAGCTGTCAAACITTTTTT      |
| plasmid_lp36 | 36249 | BB_K53  | <b>0.793</b> ± 0.7975 0.702946 | <b>0.604</b> ± 0.4493 0.18295 | <b>0.265</b> ± 0.343 0.11887  | <b>1.06</b> ± 0.541 0.47201   | TACGCATAAAATTTATTTGTTCTGCTCATTTTTTACCATAATAAACAACT    |
| plasmid_lp36 | 36485 | IG 1305 | <b>0.408</b> ± 0.2344 0.106184 | <b>1.43</b> ± 0.9959 0.56156  | <b>0.453</b> ± 0.3312 0.04536 | <b>0.508</b> ± 0.6374 0.45946 | GTTTTCGGTTTGTATTTCTGACCCCGCAAGAAATACAAATCTCAGCATC     |
| plasmid_lp38 | 425   | IG 1306 | <b>1.149</b> ± 0.6376 0.273402 | <b>1.715</b> ± 1.4628 0.33156 | <b>0.509</b> ± 0.2311 0.09512 | <b>0.738</b> ± 0.3366 0.09222 | ATACTAATTTTAAATATAGTATTATTCGATTATATTATAGTTAAGGAGA     |
| plasmid_lp38 | 1575  | BB_J02a | <b>1.775</b> ± 0.9014 0.144942 | <b>1.883</b> ± 1.9787 0.43554 | <b>0.992</b> ± 0.4149 0.96152 | <b>1.753</b> ± 0.7294 0.02557 | TTCGAGCCGTAATGAAATATGAAAGCGAAAAAGCACCCGTTATTTACTAT    |
| plasmid_lp38 | 1625  | BB_J02a | <b>0.625</b> ± 0.463 0.222765  | <b>0.848</b> ± 0.6819 0.68652 | <b>0.86</b> ± 0.2347 0.12771  | <b>1.088</b> ± 0.2129 0.44567 | TAACTTTTAAATGTCTCTTGTACTTTAGGAATAGGATCTTTTTTTGGCC     |
| plasmid_lp38 | 2072  | BB_J02a | <b>1.645</b> ± 2.9993 0.562201 | <b>1.094</b> ± 1.3788 0.79773 | <b>1.058</b> ± 1.3072 0.95323 | <b>1.025</b> ± 1.2694 0.97699 | ATACATTTAGAAATCAAAATTAAGAAATGGCTCCTGCTTCGGTTATA       |
| plasmid_lp38 | 2876  | BB_J05  | <b>0.970</b> ± 1.0199 0.952309 | <b>1.438</b> ± 1.5539 0.36779 | <b>0.475</b> ± 0.4965 0.22741 | <b>0.684</b> ± 0.6841 0.43432 | TTTTCCATCAATTAACACTATGCAGTAGTGGCCACATTAATAAATGACTCTAA |
| plasmid_lp38 | 3318  | BB_J05  | <b>0.724</b> ± 0.3172 0.097649 | <b>1.74</b> ± 1.3469 0.39908  | <b>0.604</b> ± 0.2546 0.01262 | <b>0.767</b> ± 0.2584 0.07477 | GATACTAAAAATAACAGTAACTAAAGGCAATAAAAAAGAGATATTTGGT     |
| plasmid_lp38 | 3493  | BB_J05  | <b>1.379</b> ± 0.7395 0.210708 | <b>1.935</b> ± 2.1538 0.37227 | <b>1.116</b> ± 0.6456 0.39357 | <b>1.243</b> ± 0.7543 0.12657 | ATAATCAAAAAAATCAATAAGAAATGGAATAATGTTATATAAAGCTACTCTA  |
| plasmid_lp38 | 3527  | BB_J05  | <b>1.294</b> ± 0.3702 0.081372 | <b>1.726</b> ± 1.0781 0.28084 | <b>0.807</b> ± 0.2008 0.08076 | <b>1.116</b> ± 0.2947 0.10133 | TGAAAGTAAGAAAATAATAAACTTTTGAAGTAATAATCAAAAAACTCA      |
| plasmid_lp38 | 3549  | BB_J05  | <b>0.789</b> ± 0.6311 0.001414 | <b>0.948</b> ± 0.9319 0.79895 | <b>1.004</b> ± 0.6961 0.87788 | <b>1.065</b> ± 0.6917 0.26795 | GAACACAATAATTTCTAAATATGAAAGTAAGAAAATAATAAACTTTTAG     |
| plasmid_lp38 | 3552  | BB_J05  | <b>0.859</b> ± 0.7034 0.105993 | <b>0.945</b> ± 0.9399 0.81821 | <b>1.016</b> ± 0.6461 0.90607 | <b>0.894</b> ± 0.5855 0.42811 | TTTTCTTTTTAATTTATCTAAAAAATTTATATGCAGAGTTAAAGTCAA      |
| plasmid_lp38 | 3680  | BB_J05  | <b>0.516</b> ± 0.8126 0.568179 | <b>1.337</b> ± 1.0391 0.60274 | <b>1.244</b> ± 1.7853 0.86585 | <b>1.166</b> ± 1.2573 0.78312 | TTACCTTCCAAGTAAATATAAATAAGAAATTTCTATTCTTAAAGAAAGTTA   |
| plasmid_lp38 | 3828  | BB_J05  | <b>1.598</b> ± 0.8982 0.380487 | <b>2.408</b> ± 2.1163 0.34971 | <b>0.898</b> ± 0.5288 0.51542 | <b>1.214</b> ± 0.8853 0.46157 | ATTAGCGCTAATAAAGCTTATAAGCATAGAATATATCTTAAACGGCAATCAA  |
| plasmid_lp38 | 3856  | IG 1307 | <b>1.375</b> ± 1.4923 0.317973 | <b>2.392</b> ± 3.3046 0.39048 | <b>0.819</b> ± 0.7652 0.17724 | <b>0.815</b> ± 0.5694 0.7086  | CTTAAGCGTATATGTCACAGAAGATAACCATTAATAATCACTGTGTATATT   |
| plasmid_lp38 | 3946  | IG 1308 | <b>0.322</b> ± 0.2385 0.106933 | <b>0.489</b> ± 0.4332 0.23586 | <b>0.748</b> ± 0.2549 0.20041 | <b>0.673</b> ± 0.3679 0.0426  | TGCCTATATTTAGTAACTAATACTAGGTGATAAATTAATGAATATACACAG   |
| plasmid_lp38 | 4159  | IG 1309 | <b>1.968</b> ± 1.2462 0.079477 | <b>1.711</b> ± 1.8424 0.47337 | <b>0.736</b> ± 0.3907 0.32825 | <b>1.759</b> ± 1.0175 0.22072 | CTTATTTAGATAAGTATTGCTGAAAACCTTATTTTTGGTCTAGAAGCTATT   |
| plasmid_lp38 | 4221  | IG 1310 | <b>1.245</b> ± 1.1496 0.534735 | <b>2.303</b> ± 1.7414 0.25241 | <b>0.689</b> ± 0.5609 0.34583 | <b>0.811</b> ± 0.555 0.67569  | TAGAGATAAGGCAATAGCTTCTAGACCAAAAAATAAGGTTTTAGCAAACT    |
| plasmid_lp38 | 4289  | IG 1311 | <b>1.400</b> ± 0.516 0.273548  | <b>0.992</b> ± 0.392 0.98111  | <b>0.961</b> ± 0.3446 0.85165 | <b>1.344</b> ± 0.4237 0.12409 | TTAGCAAATTCATCTCCACCTAAATTTATAGAAATTAAGGTGAAGAATT     |
| plasmid_lp38 | 4388  | IG 1312 | <b>0.830</b> ± 0.3489 0.24469  | <b>1.288</b> ± 0.564 0.32341  | <b>0.818</b> ± 0.5366 0.42626 | <b>0.545</b> ± 0.4097 0.32707 | TTTCACCTCAGAAAGAAATTAACAAGTTGTTTAACTAAAAAGTAAACAAGAA  |
| plasmid_lp38 | 4624  | BB_J08  | <b>0.889</b> ± 0.8394 0.599102 | <b>2.201</b> ± 2.7084 0.434   | <b>0.875</b> ± 0.4022 0.61298 | <b>1.263</b> ± 0.668 0.40237  | GATTTCAAATTTGCCTAATAAAGAGCAAAAAATAACAATGATATAAAAGAA   |
| plasmid_lp38 | 4895  | BB_J08  | <b>0.590</b> ± 0.5408 0.490269 | <b>1.508</b> ± 1.4868 0.4951  | <b>0.387</b> ± 0.4115 0.1185  | <b>0.722</b> ± 0.6471 0.29343 | CTAACCTTATTAGCAGATGCTCTAAAGACACTACATGCCCTACAGGGAGG    |
| plasmid_lp38 | 5225  | BB_J08  | <b>1.147</b> ± 1.0856 0.732689 | <b>0.509</b> ± 0.5715 0.00247 | <b>1.582</b> ± 1.7458 0.67265 | <b>0.766</b> ± 0.7905 0.15266 | ATTTTCATCAAGTTCATCCACTATCTTTAAATTTTGAATTTGTGTTAGT     |
| plasmid_lp38 | 5753  | IG 1313 | <b>1.482</b> ± 0.4549 0.001797 | <b>1.736</b> ± 1.2809 0.43354 | <b>0.904</b> ± 0.366 0.71211  | <b>1.258</b> ± 0.6441 0.51712 | ATAATAAGTCTTTGAAAAATGATAGTAAAGATGATTCTCCTAATAATT      |
| plasmid_lp38 | 5767  | IG 1314 | <b>1.701</b> ± 0.9016 0.037533 | <b>2.131</b> ± 1.3919 0.09459 | <b>1.018</b> ± 0.4951 0.89408 | <b>1.491</b> ± 0.6463 0.1314  | GCAAGCTTATCTAATAATAAGTCTTTGAAAAATGATAGTAAAGTATGGA     |
| plasmid_lp38 | 5776  | IG 1315 | <b>0.795</b> ± 0.3653 0.415541 | <b>0.83</b> ± 0.7231 0.74501  | <b>1.025</b> ± 0.6002 0.95967 | <b>0.94</b> ± 0.6925 0.92329  | TAATAGCTTTTACATAGTTTATAGATAACCCGCAAAATTAAGACAATTC     |
| plasmid_lp38 | 6110  | BB_J09  | <b>1.356</b> ± 1.123 0.005327  | <b>2.612</b> ± 2.6627 0.20835 | <b>0.919</b> ± 0.6142 0.81397 | <b>1.038</b> ± 0.973 0.68524  | CTACTGTTAAGTTTTTTTTATTGCTCTCAATATCTTGTGTTTCATGATAAA   |
| plasmid_lp38 | 6257  | BB_J09  | <b>0.492</b> ± 0.3932 0.016074 | <b>0.998</b> ± 0.9972 0.9947  | <b>0.946</b> ± 0.7576 0.73185 | <b>1.488</b> ± 1.2346 0.36549 | ATATGCTCTGTTTTTTGATTGTAATTTGAATTTGCGCCTTCATTATCTA     |
| plasmid_lp38 | 6737  | BB_J09  | <b>1.704</b> ± 0.7935 0.207924 | <b>1.489</b> ± 0.5659 0.18381 | <b>0.947</b> ± 0.3456 0.70989 | <b>0.916</b> ± 0.1551 0.24154 | TTTTATCCAATGCTCTTTGACTGTATTTTCTACATCAATTAACCTATCTT    |
| plasmid_lp38 | 7780  | BB_J11  | <b>0.124</b> ± 0.1558 0.16462  | <b>0.31</b> ± 0.3594 0.16114  | <b>0.291</b> ± 0.3161 0.11218 | <b>0.353</b> ± 0.2387 0.24281 | ACAGTCTACTGCAGGGTATAACGATCATTACTATGCCTGGATAAAATAATG   |
| plasmid_lp38 | 7922  | BB_J11  | <b>0.840</b> ± 0.3136 0.487152 | <b>0.708</b> ± 0.9519 0.60747 | <b>0.629</b> ± 0.1266 0.08356 | <b>0.597</b> ± 0.583 0.30051  | TGTATATTTTTTGTGATACATAAGTTACAAAAACTTAAAAACCTGGGGC     |

|              |       |          |                                |                               |                               |                               |                                                        |
|--------------|-------|----------|--------------------------------|-------------------------------|-------------------------------|-------------------------------|--------------------------------------------------------|
| plasmid_lp38 | 8188  | IG 1316  | <b>1.020</b> ± 0.2292 0.892347 | <b>1.006</b> ± 0.1261 0.95357 | <b>0.812</b> ± 0.1985 0.04828 | <b>0.98</b> ± 0.1606 0.884    | TGTATGTATAATTAACCTTTTTAATTAATAAAAAATCTCTAAAAAGAAAAATT  |
| plasmid_lp38 | 8315  | IG 1317  | <b>0.701</b> ± 0.3826 0.491187 | <b>2.072</b> ± 2.1371 0.4099  | <b>0.676</b> ± 0.6201 0.55623 | <b>0.716</b> ± 0.5591 0.41773 | TTATAAAAAATATATTTTACATCAAAACAAATTTATTCACGCTTCTCAAAGCTT |
| plasmid_lp38 | 8366  | IG 1318  | <b>1.160</b> ± 0.7739 0.223809 | <b>1.941</b> ± 2.1602 0.39452 | <b>0.814</b> ± 0.6185 0.08661 | <b>1.144</b> ± 0.7969 0.41921 | GAAGCTTTGAGAAGCTTGAATAATTTGTTGATGTAATAATATTTTTATA      |
| plasmid_lp38 | 8932  | BB_J13   | <b>1.089</b> ± 0.8997 0.776644 | <b>1.836</b> ± 2.0918 0.24528 | <b>0.506</b> ± 0.4367 0.26515 | <b>0.856</b> ± 0.8148 0.54262 | AATAGTATTTTGATTCCTTTTTCTACTTTCTAGCTCAAGCTTAACTTTAAA    |
| plasmid_lp38 | 9387  | IG 1319  | <b>0.714</b> ± 0.3717 0.298841 | <b>1.777</b> ± 0.3915 0.09362 | <b>1.003</b> ± 0.3688 0.99096 | <b>0.917</b> ± 1.1547 0.91938 | TGCTGTCTCGAGTATTTTTAGTAGCCCATATTGAATGAAATTCAAAAATAA    |
| plasmid_lp38 | 9654  | BB_J15a  | <b>0.625</b> ± 0.2655 0.229382 | <b>0.757</b> ± 0.582 0.08941  | <b>0.581</b> ± 0.4268 0.0121  | <b>0.662</b> ± 0.5427 0.10654 | ATGGACGCTATTTCGATTTTTTATCAACCTTTTTTATATATTGAAAAAGT     |
| plasmid_lp38 | 9690  | BB_J15a  | <b>1.398</b> ± 1.1702 0.667636 | <b>0.994</b> ± 0.8649 0.99384 | <b>0.868</b> ± 0.4528 0.71104 | <b>1.886</b> ± 0.998 0.11378  | AATAAAAAAGGTTGATAAAAAAATCGAATAGCGTCCATTAATAATAATAATT   |
| plasmid_lp38 | 9747  | BB_J15a  | <b>2.671</b> ± 0.6405 0.012205 | <b>2.799</b> ± 2.2296 0.26445 | <b>2.463</b> ± 1.4556 0.22727 | <b>2.048</b> ± 1.5526 0.35291 | TAATCCAAATATACTAATAGATTTATTGTTATCAATAAAAAAATCTTTTC     |
| plasmid_lp38 | 9752  | BB_J15a  | <b>1.161</b> ± 1.1807 0.770711 | <b>1.981</b> ± 1.6779 0.29071 | <b>0.711</b> ± 0.3294 0.3519  | <b>1.113</b> ± 0.7848 0.61172 | TGCACTATTTTGTTTTATCAGATATTATAGGAGCCTGGATATTTAGAAAAAT   |
| plasmid_lp38 | 9881  | BB_J15a  | <b>2.689</b> ± 2.2424 0.221564 | <b>1.773</b> ± 1.6 0.50023    | <b>0.595</b> ± 0.7367 0.63041 | <b>1.557</b> ± 1.4484 0.52868 | AATATATGAAACTATTATTAAACTGATAATAAAAAATGATAACCAAAGC      |
| plasmid_lp38 | 9895  | BB_J15a  | <b>1.113</b> ± 0.6697 0.705755 | <b>1.512</b> ± 1.1407 0.29432 | <b>0.609</b> ± 0.36 0.29286   | <b>1.141</b> ± 0.757 0.73731  | GTAATATATATGTAATATATGAAACTATTATTAAACTGATAATAAAAAAT     |
| plasmid_lp38 | 10004 | BB_J15a  | <b>1.408</b> ± 0.9474 0.576774 | <b>1.261</b> ± 0.993 0.74885  | <b>1.626</b> ± 0.9208 0.16247 | <b>1.299</b> ± 1.0111 0.48206 | CTATTAATAAAAAGGTATAGTTACTAAAACCTTTGAATCTATATTTTTTTAA   |
| plasmid_lp38 | 10040 | BB_J15a  | <b>1.189</b> ± 1.4049 0.866528 | <b>1.84</b> ± 2.1631 0.60983  | <b>1.099</b> ± 0.5836 0.79316 | <b>1.311</b> ± 1.4375 0.78497 | GTTGGTGCTGAAAATGAAAATATCGCGAGACAATGTACTTAATTAATAAAAAGT |
| plasmid_lp38 | 10045 | BB_J15a  | <b>1.600</b> ± 0.8818 0.057185 | <b>1.762</b> ± 1.512 0.3087   | <b>0.393</b> ± 0.1807 0.124   | <b>1.165</b> ± 0.5732 0.16936 | TGTTCAATTTTAAACATTTTATAAGTGCTACAAAACGCGCTGTTTTATTA     |
| plasmid_lp38 | 10113 | BB_J15a  | <b>0.558</b> ± 0.5369 0.211274 | <b>1.082</b> ± 0.8407 0.881   | <b>0.707</b> ± 0.2684 0.00265 | <b>1.323</b> ± 0.5253 0.26753 | ATGTACAAAAAATAAACATTAATAAAACAGGCGTATTTGTAGCACTTATAA    |
| plasmid_lp38 | 10307 | IG 1320  | <b>1.379</b> ± 0.5703 0.072701 | <b>1.968</b> ± 1.193 0.1844   | <b>0.961</b> ± 0.3377 0.33756 | <b>1.237</b> ± 0.4842 0.17924 | ACTATTAACCTATTAACCTATTAGTAGATTTAAGTTTTCCCCCGCTTAATTT   |
| plasmid_lp38 | 10352 | IG 1321  | <b>0.039</b> ± 0.04 0.097087   | <b>0.777</b> ± 1.0399 0.78078 | <b>0.018</b> ± 0.0329 0.09316 | <b>0.215</b> ± 0.3893 0.17123 | ATAGTTAATAGTTAATAGTTACTTTTGATTAAGATTATATATAGCAAAAAA    |
| plasmid_lp38 | 13526 | IG 1322  | <b>1.560</b> ± 1.2547 0.155807 | <b>2.313</b> ± 2.1137 0.12649 | <b>1.055</b> ± 0.8503 0.73592 | <b>1.278</b> ± 1.2556 0.44257 | ATAAAAAAATATAAAAAATAGAGGTTGAAATTTTTACATATTTTATACATA    |
| plasmid_lp38 | 13731 | BB_J0056 | <b>1.421</b> ± 1.0174 0.566421 | <b>1.702</b> ± 0.7624 0.04873 | <b>1.288</b> ± 1.0166 0.70823 | <b>1.992</b> ± 1.3724 0.20207 | AATCTGATCTTAAAAAGATAAAAACCTGTTGTTAATAACTAAAATAAACA     |
| plasmid_lp38 | 13765 | IG 1323  | <b>0.460</b> ± 0.3317 0.024695 | <b>1.588</b> ± 2.3411 0.65295 | <b>0.469</b> ± 0.4114 0.24326 | <b>0.685</b> ± 0.2572 0.20585 | TTTTAAGTTAAGGAAAATGAACAAAATCTATTTAAATCTGATCTTAAAAAG    |
| plasmid_lp38 | 13770 | IG 1324  | <b>1.276</b> ± 1.2973 0.34012  | <b>2.869</b> ± 4.1709 0.39778 | <b>1.199</b> ± 1.4571 0.86668 | <b>1.377</b> ± 0.9812 0.4824  | GCTCAGTACTTTTTATTGTTTTGGTTATGTAATTAGGTGATCCAATCTCC     |
| plasmid_lp38 | 13911 | BB_J20   | <b>0.785</b> ± 0.5011 0.68765  | <b>1.755</b> ± 1.4006 0.27709 | <b>0.719</b> ± 0.5569 0.01638 | <b>1.586</b> ± 0.7923 0.17312 | GAACCAATTTAGAAAATCTACTTAATAGCTTTTAAACAAAATGAATAAAAAAT  |
| plasmid_lp38 | 14046 | IG 1325  | <b>0.286</b> ± 0.264 0.021242  | <b>0.26</b> ± 0.3022 0.10488  | <b>0.187</b> ± 0.2048 0.06768 | <b>0.207</b> ± 0.1944 0.04528 | TTTAAAAAGACATATGGTTTTAAAATAATTATATATCTTTTACCTTTATAAA   |
| plasmid_lp38 | 14113 | IG 1326  | <b>1.331</b> ± 0.8976 0.181747 | <b>2.675</b> ± 2.8928 0.25935 | <b>1.073</b> ± 1.1579 0.76358 | <b>1.941</b> ± 1.5218 0.07306 | GCTATTTGCAATTTATCAAGGTTTTTATAAGTTGTAATAATTTTACCACAA    |
| plasmid_lp38 | 14181 | IG 1327  | <b>1.359</b> ± 0.6362 0.31039  | <b>1.494</b> ± 1.0769 0.44808 | <b>0.483</b> ± 0.1168 0.05361 | <b>0.826</b> ± 0.6051 0.5714  | TATATGAAGTATTAACAACACTGTCACCTATTACTATTACTATCAGCTCGGG   |
| plasmid_lp38 | 14291 | IG 1328  | <b>0.848</b> ± 0.2879 0.315202 | <b>1.581</b> ± 0.7921 0.15912 | <b>0.534</b> ± 0.2075 0.09707 | <b>0.904</b> ± 0.2811 0.56607 | TAAAAGCCTTTCAATAATATATAAATTTAGAAATGCCCATTTATAGCCTC     |
| plasmid_lp38 | 14650 | IG 1329  | <b>1.026</b> ± 1.0418 0.954593 | <b>2.066</b> ± 2.7329 0.42729 | <b>0.494</b> ± 0.4388 0.26531 | <b>0.641</b> ± 0.5081 0.50107 | AGGCTGTCACTGGTTTTATTGAATAAAAGGCATAGAGCTATTTATTAATAAAT  |
| plasmid_lp38 | 14675 | IG 1330  | <b>0.539</b> ± 0.4397 0.161163 | <b>0.687</b> ± 0.6887 0.67799 | <b>0.872</b> ± 0.6938 0.47368 | <b>0.85</b> ± 0.6579 0.59136  | AAAGGCATAGAGCTATTTATTAATAAGGCTTTTAATTGAATTTGCTTTTA     |
| plasmid_lp38 | 14898 | IG 1331  | <b>0.450</b> ± 0.4362 0.171464 | <b>1.354</b> ± 1.9824 0.72968 | <b>0.845</b> ± 0.7487 0.83089 | <b>0.346</b> ± 0.4131 0.22361 | GCTATTTTTTTTTAAACATAAATTTAAAGCGTATTTTCGATTGCCCTTTTA    |
| plasmid_lp38 | 15551 | BB_J21a  | <b>1.424</b> ± 1.1715 0.204791 | <b>1.144</b> ± 1.2522 0.57529 | <b>0.671</b> ± 0.5172 0.34559 | <b>0.964</b> ± 0.784 0.9456   | AATATGTTTTATTAACAACCAATTTTATGTTTTAATAAAAACCAAGAAAATTA  |
| plasmid_lp38 | 15854 | BB_J21a  | <b>1.391</b> ± 1.1249 0.563784 | <b>2.112</b> ± 1.5712 0.20685 | <b>1.147</b> ± 1.4023 0.79268 | <b>1.078</b> ± 0.9094 0.82157 | AATATAAAAAATTAATTCGGCATATTAACAAAATGGTATAAATAATAGATTCT  |
| plasmid_lp38 | 16367 | IG 1332  | <b>1.375</b> ± 1.3586 0.337188 | <b>0.944</b> ± 1.4003 0.71613 | <b>0.664</b> ± 0.7921 0.36175 | <b>0.832</b> ± 1.048 0.35931  | GACCGTTGTTTTTTAAAAGATGTTGTTTTGATTGGGTTAAGATCAA         |
| plasmid_lp38 | 16676 | BB_J23   | <b>3.843</b> ± 2.6492 0.071267 | <b>1.582</b> ± 1.6063 0.64827 | <b>1.739</b> ± 1.2219 0.38744 | <b>1.31</b> ± 1.4934 0.51525  | TATAGACATCTTCATCTTTTTTTTTGACAATTCCTCAATTTGCCCGGAAT     |
| plasmid_lp38 | 17059 | BB_J23   | <b>0.860</b> ± 1.133 0.64476   | <b>0.748</b> ± 0.9135 0.1914  | <b>1.223</b> ± 2.2257 0.83359 | <b>1.467</b> ± 2.1303 0.65232 | CCAACCTGCAAGAGAAGTGTGGCAAAATGAGTTTTACTATTAATTTTTTAA    |
| plasmid_lp38 | 17678 | BB_J24   | <b>0.851</b> ± 0.3282 0.184434 | <b>1.244</b> ± 0.7175 0.32251 | <b>0.693</b> ± 0.2865 0.03875 | <b>0.953</b> ± 0.3691 0.79802 | CAATGATTTGATTCAAAAAATTCGCAATTAATTTGCGTCTTAAAAAT        |
| plasmid_lp38 | 17713 | BB_J24   | <b>0.243</b> ± 0.1057 0.096893 | <b>0.469</b> ± 0.5064 0.38644 | <b>0.485</b> ± 0.2022 0.17896 | <b>0.581</b> ± 0.2895 0.10483 | ATTGTGCTTTGAAAATTTCTTTAGAAAGATGATAATGTTCCACGCGGATATT   |
| plasmid_lp38 | 17850 | BB_J24   | <b>0.335</b> ± 0.413 0.345348  | <b>1.14</b> ± 1.3232 0.64357  | <b>2.718</b> ± 3.0782 0.43615 | <b>0.269</b> ± 0.301 0.10948  | AATGCCTCTGGCATTAAACAAAATAAGAATAACAATCCTTCTCTATTGTGCG   |
| plasmid_lp38 | 17966 | BB_J24   | <b>2.087</b> ± 2.2912 0.124063 | <b>0.724</b> ± 1.1872 0.19472 | <b>1.02</b> ± 1.3551 0.90416  | <b>1.436</b> ± 1.4617 0.54486 | GCTTTTTGCAATAGAATCTTATAAAAAATCTCTATTGACACTCTAATCTG     |
| plasmid_lp38 | 20841 | BB_J27   | <b>2.442</b> ± 2.3049 0.171844 | <b>0.901</b> ± 1.0486 0.91759 | <b>0.564</b> ± 0.4039 0.35175 | <b>1.125</b> ± 0.7962 0.80248 | AGACCAATATAAACATAAATGTTGTTCTAGTCATCCCTAAAACAGATTTAA    |
| plasmid_lp38 | 21213 | BB_J27   | <b>0.810</b> ± 0.2418 0.171488 | <b>1.282</b> ± 0.8288 0.57175 | <b>0.797</b> ± 0.1657 0.01846 | <b>0.883</b> ± 0.2419 0.39964 | CCTACTACCGATTTCTTACTGCTTTGCTAAAGTCCGCAAAATGAAGAAA      |
| plasmid_lp38 | 21497 | BB_J28   | <b>1.073</b> ± 0.6479 0.377247 | <b>2.169</b> ± 1.6461 0.20207 | <b>0.998</b> ± 0.6383 0.99158 | <b>1.185</b> ± 0.6233 0.43723 | AAGGCGATTTTATGCTAGGAAGACAAGCCAAGATTCCAATTAAGGTAAGCT    |
| plasmid_lp38 | 22136 | BB_J29   | <b>1.066</b> ± 1.2662 0.815598 | <b>1.552</b> ± 2.5129 0.59722 | <b>0.73</b> ± 0.7675 0.26998  | <b>1.008</b> ± 1.6333 0.98831 | CAATTTGACAATGAAGCTTATTTAGGATTTTTATTAACATAAAGATATTA     |
| plasmid_lp38 | 22358 | BB_J29   | <b>1.360</b> ± 0.7679 0.153331 | <b>1.684</b> ± 1.4282 0.3548  | <b>0.836</b> ± 0.4185 0.08467 | <b>1.202</b> ± 0.8248 0.47594 | GAAACGAAATGGTTTTTGAGTTTTATTTTTATTTCTAATTTCTGCT         |
| plasmid_lp38 | 22462 | BB_J29   | <b>0.301</b> ± 0.3513 0.2946   | <b>0.325</b> ± 0.3822 0.31842 | <b>0.559</b> ± 0.4951 0.49445 | <b>0.352</b> ± 0.1995 0.16822 | TTTGGGAGATGAAAATTTATCTAAGCTTTCTTTGTCTAACATAGAACCCTAA   |
| plasmid_lp38 | 22465 | BB_J29   | <b>0.587</b> ± 0.5964 0.045045 | <b>0.857</b> ± 0.8667 0.36726 | <b>0.847</b> ± 0.6531 0.12343 | <b>0.97</b> ± 0.7303 0.75954  | TTTATCCCTTGCTTTTATTTCAAGCATCTTTTAAATGAAGTTGATTTACT     |
| plasmid_lp38 | 22725 | BB_J29   | <b>0.390</b> ± 0.3624 0.387283 | <b>0.782</b> ± 0.9786 0.80577 | <b>2.133</b> ± 1.8285 0.00515 | <b>1.269</b> ± 1.4876 0.54202 | AAAACGTCATTTTCAAAGCTAATAATATCTAAGACCAAGCAAAAATCTA      |
| plasmid_lp38 | 22910 | BB_J29   | <b>0.149</b> ± 0.1661 0.060683 | <b>1.22</b> ± 1.542 0.81533   | <b>0.68</b> ± 1.1599 0.63844  | <b>0.826</b> ± 0.7676 0.7674  | AAGAACATTTCTTAAAGAAATTAATAAATTTTCAAAATAGAAATGCAAGG     |
| plasmid_lp38 | 22923 | BB_J29   | <b>0.497</b> ± 0.46 0.170192   | <b>0.504</b> ± 0.4677 0.25975 | <b>0.563</b> ± 0.3032 0.33602 | <b>0.756</b> ± 0.3962 0.50412 | TTTGACACCTTTAAAGAACATTTTAAAGAAATTAATAAATTTTCAAAA       |
| plasmid_lp38 | 23061 | IG 1333  | <b>1.267</b> ± 0.3031 0.195262 | <b>1.644</b> ± 0.8713 0.31595 | <b>0.904</b> ± 0.2256 0.60551 | <b>1.173</b> ± 0.3096 0.36755 | ATACACTCATCTTGAATATAACATGAAAAAATAATATACCAACTAGAAA      |

|              |       |         |                                |                               |                               |                               |                                                       |
|--------------|-------|---------|--------------------------------|-------------------------------|-------------------------------|-------------------------------|-------------------------------------------------------|
| plasmid_lp38 | 23152 | IG 1334 | <b>1.151</b> ± 0.6841 0.748826 | <b>1.863</b> ± 1.4857 0.24914 | <b>0.787</b> ± 0.4914 0.27396 | <b>0.967</b> ± 0.6739 0.95581 | TAACAAATAATTTGGCAGTTCATTTAACTTTACATTGATAGATAAAAATAGA  |
| plasmid_lp38 | 23300 | IG 1335 | <b>0.918</b> ± 0.4366 0.703422 | <b>1.712</b> ± 1.3822 0.26581 | <b>1.041</b> ± 0.5402 0.79851 | <b>0.967</b> ± 0.4915 0.83908 | AATATATTTTCATCATATTTAAACCTCTCTTACAAGGATATTTACCTCA     |
| plasmid_lp38 | 23525 | BB_J31  | <b>1.327</b> ± 0.7368 0.474187 | <b>2.367</b> ± 3.5463 0.50685 | <b>1.11</b> ± 0.6787 0.58251  | <b>0.801</b> ± 0.7676 0.50763 | AGTAGTAAAAAGGGGAATGCTAGTATAGCATTGGGAGAGGTTCCCTCACTT   |
| plasmid_lp38 | 23547 | BB_J31  | <b>0.572</b> ± 0.409 0.255135  | <b>0.483</b> ± 0.51 0.46158   | <b>1.018</b> ± 0.7956 0.86616 | <b>1.084</b> ± 0.9841 0.36822 | CTAGCATTCCCCTTTTACTACTTAAAACTTTATCTTTAGATTCTCTGGCA    |
| plasmid_lp38 | 23644 | BB_J31  | <b>0.259</b> ± 0.2768 0.036142 | <b>0.232</b> ± 0.1272 0.03206 | <b>0.178</b> ± 0.2309 0.02104 | <b>0.549</b> ± 0.4524 0.21792 | TGATGCCTCATATCCTCTTTTACAGACAATATGAAGATCGGGATAGGTAGAAT |
| plasmid_lp38 | 23738 | BB_J31  | <b>1.032</b> ± 0.4262 0.567293 | <b>1.142</b> ± 0.5316 0.24555 | <b>0.938</b> ± 0.3162 0.53425 | <b>0.964</b> ± 0.387 0.16388  | AATGATAGCGATAATGATAATTTTGATGATAATAGCTGCGAGAAAAATAAG   |
| plasmid_lp38 | 23757 | BB_J31  | <b>1.622</b> ± 0.6652 0.225013 | <b>2.281</b> ± 1.0244 0.14878 | <b>1.155</b> ± 0.2037 0.24515 | <b>1.328</b> ± 0.1081 0.00064 | ATTTTGATGATAATAGCTGCGAGAAAAATAAGAAAGTGGTAGATGAATTTA   |
| plasmid_lp38 | 23832 | BB_J31  | <b>0.719</b> ± 1.0742 0.711522 | <b>1.227</b> ± 1.4187 0.81919 | <b>1.158</b> ± 1.3295 0.86388 | <b>1.032</b> ± 1.0528 0.73326 | GTTGTTCTATAATGAGCTTGAATCTTCTTCAAGACAAAAGGAAAAGATT     |
| plasmid_lp38 | 24080 | BB_J31  | <b>1.145</b> ± 0.1791 0.006239 | <b>1.362</b> ± 0.6787 0.50303 | <b>0.728</b> ± 0.4278 0.41602 | <b>0.963</b> ± 0.1181 0.67299 | TATCATAAGCAAGCCGTTTTACAAGCTCCGCTAGAACTGGCAGCTTCGC     |
| plasmid_lp38 | 24115 | IG 1336 | <b>1.143</b> ± 0.8534 0.048958 | <b>1.99</b> ± 2.0516 0.28913  | <b>0.903</b> ± 0.5076 0.73261 | <b>1.148</b> ± 0.8298 0.36173 | ATTAGTGTGTATTATATAGGTGATAAGTTAAAGTACATCTACTGTACTT     |
| plasmid_lp38 | 24128 | IG 1337 | <b>0.667</b> ± 0.5991 0.193359 | <b>0.746</b> ± 0.6552 0.34216 | <b>0.794</b> ± 0.2764 0.16463 | <b>1.141</b> ± 0.3266 0.4166  | AATACAACACTAATAATATATAAATGAAATATTTTTCATAATATAT        |
| plasmid_lp38 | 24315 | IG 1338 | <b>1.340</b> ± 0.6073 0.150043 | <b>1.996</b> ± 1.297 0.10649  | <b>0.765</b> ± 0.4069 0.29455 | <b>1.102</b> ± 0.6092 0.63316 | ATTCATTTATAGTAAAAGCTTTATTGTAAATAAATTTAAATAAAAAAAGGT   |
| plasmid_lp38 | 24668 | IG 1339 | <b>1.043</b> ± 0.5343 0.392155 | <b>2.072</b> ± 1.8359 0.33882 | <b>0.905</b> ± 1.0966 0.86863 | <b>1.307</b> ± 1.5649 0.71287 | AGTCCAATAGATAGTGTATTATGTGTAATGTTATTTTAAATAATTTTAG     |
| plasmid_lp38 | 24729 | IG 1340 | <b>1.980</b> ± 2.3535 0.403652 | <b>1.096</b> ± 1.3393 0.93408 | <b>0.332</b> ± 0.5536 0.12733 | <b>1.098</b> ± 1.467 0.7376   | TTAAAGAGCAGCTCTTTAATAAAAAATCAAATGTAAATGTTTACTCTGAA    |
| plasmid_lp38 | 24992 | IG 1341 | <b>1.398</b> ± 0.7808 0.221231 | <b>2.124</b> ± 1.757 0.3319   | <b>0.985</b> ± 0.3513 0.93977 | <b>1.077</b> ± 0.3617 0.74424 | TATATTTAAAAATAAGCCACGATTAAGGATCCAATCCTCCTGGGACAACA    |
| plasmid_lp38 | 25037 | IG 1342 | <b>1.077</b> ± 0.3171 0.716231 | <b>1.563</b> ± 0.8196 0.40026 | <b>0.765</b> ± 0.187 0.05906  | <b>0.808</b> ± 0.2111 0.18599 | CAAGATATTAACACCTTTTTTCTTAGCATTAAATCATTATTATATATT      |
| plasmid_lp38 | 25204 | IG 1343 | <b>0.974</b> ± 0.4668 0.931542 | <b>1.238</b> ± 1.0955 0.74909 | <b>0.688</b> ± 0.4203 0.34161 | <b>0.786</b> ± 0.4048 0.4704  | AGCTATAAAAAATTTTGTACACAAGACATTCATGTAATCATTTATTTCT     |
| plasmid_lp38 | 25209 | IG 1344 | <b>0.965</b> ± 0.6597 0.915797 | <b>0.807</b> ± 0.5172 0.45327 | <b>1.029</b> ± 0.4664 0.88454 | <b>0.864</b> ± 0.4618 0.66042 | TGCTATTTATATCCTATAAAAAATAAACATAAATAAACATAACCAAAT      |
| plasmid_lp38 | 25215 | IG 1345 | <b>1.610</b> ± 0.9677 0.37072  | <b>1.789</b> ± 1.5202 0.50313 | <b>0.799</b> ± 0.453 0.63998  | <b>0.629</b> ± 0.4418 0.43478 | TTTATATCCTATAAAAAATAAACATAAATAAACATAACCAAATAAATTA     |
| plasmid_lp38 | 25269 | IG 1346 | <b>0.431</b> ± 0.7845 0.331577 | <b>0.307</b> ± 0.5597 0.11648 | <b>0.818</b> ± 0.8455 0.78778 | <b>0.274</b> ± 0.4991 0.10099 | TACATAATTTATTTTGGTTATGTTTTATTATGTTTTATTTTTATAGGATA    |
| plasmid_lp38 | 25377 | BB_J34  | <b>1.056</b> ± 0.2397 0.736273 | <b>1.438</b> ± 0.4229 0.19133 | <b>1.148</b> ± 0.3724 0.62999 | <b>1.088</b> ± 0.2289 0.60868 | GCTCTTAGCTTCTCAATGGCAGCAATCATTTTGTCTACCTCCGACCTTTT    |
| plasmid_lp38 | 25494 | BB_J34  | <b>0.864</b> ± 0.5949 0.727544 | <b>0.827</b> ± 0.8946 0.78831 | <b>0.645</b> ± 0.7561 0.62588 | <b>0.986</b> ± 0.5458 0.96512 | GCACCCACAACAACATCAACAGCATGGTCTCTTTATTGGCATTAGCATAC    |
| plasmid_lp38 | 25612 | BB_J34  | <b>1.176</b> ± 0.7156 0.571434 | <b>0.734</b> ± 0.5371 0.60204 | <b>1.016</b> ± 0.4116 0.94023 | <b>1.422</b> ± 0.8119 0.53839 | TAACAGCAAAGCATTGGCATAAGCCACACTAGCTGTTTCTATGGTCTTTT    |
| plasmid_lp38 | 25900 | BB_J34  | <b>1.071</b> ± 0.9168 0.880078 | <b>0.95</b> ± 0.8837 0.7826   | <b>0.798</b> ± 0.6519 0.74746 | <b>1.154</b> ± 1.0041 0.53417 | GTTTATTTTTTCTAGGTCGTTAAGGGCTTGACTACGCCCTGCAGAGGGC     |
| plasmid_lp38 | 26033 | BB_J34  | <b>1.134</b> ± 0.3937 0.068485 | <b>1.545</b> ± 1.2034 0.41743 | <b>0.776</b> ± 0.2044 0.10187 | <b>0.964</b> ± 0.3547 0.66566 | TAACAAATATACACGCTCTTATAATACCATTGCAACTATTCTGGTTGTGC    |
| plasmid_lp38 | 26057 | BB_J34  | <b>1.944</b> ± 1.7327 0.419315 | <b>1.705</b> ± 1.8348 0.48002 | <b>0.717</b> ± 0.6686 0.50818 | <b>2.303</b> ± 2.1641 0.13826 | TCAAGGGATACTCAATCTATTTATAACAAATATACACGCTTATAATAC      |
| plasmid_lp38 | 26097 | BB_J34  | <b>1.047</b> ± 0.8601 0.932688 | <b>1.827</b> ± 0.9278 0.25967 | <b>0.615</b> ± 0.4976 0.38134 | <b>0.897</b> ± 0.3038 0.6025  | TGGATAAGCTTAAAGCTTTTTTGTAAAAACTATAACATTAACGGGATAC     |
| plasmid_lp38 | 26190 | BB_J34  | <b>1.081</b> ± 0.5692 0.818456 | <b>2.008</b> ± 1.4651 0.26467 | <b>0.852</b> ± 0.4606 0.59138 | <b>1.078</b> ± 0.5727 0.83943 | GCATGTTCTGTAACCTGATCCAAGCAACTTTACTAGCAGTAGTACACCT     |
| plasmid_lp38 | 26770 | IG 1347 | <b>1.367</b> ± 0.7056 0.363619 | <b>1.32</b> ± 0.8743 0.66123  | <b>0.859</b> ± 0.4236 0.72173 | <b>0.685</b> ± 0.3215 0.32005 | TGAGCTACAAAACCTTTAAAAAGCCCCATATCCAACATAACATTAATTA     |
| plasmid_lp38 | 27314 | BB_J36  | <b>1.621</b> ± 1.0757 0.246571 | <b>1.66</b> ± 2.1593 0.59667  | <b>1.001</b> ± 0.565 0.99586  | <b>1.07</b> ± 0.7804 0.80281  | TTATTAAAAAAATATTGAGAAAGCCAGCCGATCTTATGCTGATGCTTTTG    |
| plasmid_lp38 | 27490 | BB_J36  | <b>0.576</b> ± 0.4029 0.305618 | <b>1.233</b> ± 1.2161 0.81909 | <b>0.529</b> ± 0.3293 0.16524 | <b>0.482</b> ± 0.2636 0.25918 | ATAACTAGGCACAGCACTCTTAAACATTTGCTAAGCTGAGTGACTTTTC     |
| plasmid_lp38 | 27794 | BB_J36  | <b>0.922</b> ± 0.3179 0.677789 | <b>1.788</b> ± 1.4908 0.47669 | <b>0.975</b> ± 0.6409 0.96132 | <b>1.312</b> ± 0.4261 0.28813 | GTAGTATCACTAACAAATAAGGGCATCAGCAAGCATGTAAGGGCTACTAGTA  |
| plasmid_lp38 | 28245 | IG 1348 | <b>1.409</b> ± 0.4894 0.093619 | <b>1.912</b> ± 1.2169 0.25721 | <b>1.21</b> ± 0.3305 0.10605  | <b>1.339</b> ± 0.281 0.0632   | ATGAAGGGGGCAAATAAACAAAGATGACTGCTACTATTGATAAGTTATGTG   |
| plasmid_lp38 | 28316 | BB_J37  | <b>2.802</b> ± 0.8741 0.046406 | <b>2.335</b> ± 1.6908 0.27605 | <b>2.531</b> ± 1.8072 0.20159 | <b>1.75</b> ± 0.6523 0.21296  | GGTGCTATTTCTAGTATGGCCTATAATGAATTTGAATAGGAGGTTTCAAAG   |
| plasmid_lp38 | 28359 | BB_J37  | <b>0.958</b> ± 0.1662 0.606469 | <b>1.389</b> ± 0.5474 0.40177 | <b>0.819</b> ± 0.1259 0.01601 | <b>1.051</b> ± 0.2033 0.66657 | CTCCTTAGCAGCAAACACTAAAATCTTCAGCAGTTTGCCTAAATCACTAC    |
| plasmid_lp38 | 28742 | IG 1349 | <b>0.423</b> ± 0.5003 0.199674 | <b>0.894</b> ± 0.7856 0.84947 | <b>1.045</b> ± 0.7792 0.94613 | <b>1.459</b> ± 1.3193 0.64904 | TTTTTTTACGATACCGTATTATTGGTGTCTGTAATTTACGGATCAAGTT     |
| plasmid_lp38 | 28966 | IG 1350 | <b>1.184</b> ± 0.1794 0.291867 | <b>1.664</b> ± 0.5744 0.20755 | <b>0.888</b> ± 0.0961 0.17894 | <b>1.231</b> ± 0.3339 0.37611 | ACTATAGTAAGTTTATCTCTAAAATAAGATTATCCAAGCTTATTTAAGCT    |
| plasmid_lp38 | 29134 | IG 1351 | <b>2.131</b> ± 2.2334 0.253924 | <b>2.344</b> ± 3.0724 0.37259 | <b>1.506</b> ± 1.3517 0.22966 | <b>1.311</b> ± 1.3576 0.1659  | TTACATAACTTAAACCAAGAAATTAATACGGTTTTCTTTCTAACAACTCTT   |
| plasmid_lp38 | 29137 | IG 1352 | <b>1.878</b> ± 2.1555 0.24417  | <b>0.533</b> ± 0.9592 0.40443 | <b>0.874</b> ± 0.821 0.81521  | <b>0.752</b> ± 0.7937 0.30013 | CATAACTTAAACCAAGAAATTAATACGGTTTTCTTTCTAACAACTCTTTCT   |
| plasmid_lp38 | 29536 | IG 1353 | <b>1.033</b> ± 0.5452 0.94048  | <b>1.661</b> ± 1.4865 0.5479  | <b>0.819</b> ± 0.8313 0.7731  | <b>1.002</b> ± 0.9157 0.99758 | TTTTGCGAAAAGCTTCTCAACTTTAATTTGGATATTTCTGGATTAG        |
| plasmid_lp38 | 29537 | IG 1354 | <b>0.866</b> ± 0.6237 0.576828 | <b>1.011</b> ± 0.4883 0.93265 | <b>0.377</b> ± 0.3029 0.17396 | <b>0.791</b> ± 0.3143 0.33965 | AATATTTTATAATTTTTAGGATTATATCGGCAACTATGTTAAATTTACTC    |
| plasmid_lp38 | 29891 | IG 1355 | <b>0.924</b> ± 0.5098 0.48917  | <b>0.643</b> ± 0.3601 0.40935 | <b>0.938</b> ± 0.5099 0.59698 | <b>1.182</b> ± 0.7024 0.505   | TTTTTTTTTTAGATTAATCAGCTTGTTTAGTAGATAAAGAGGATGGGAA     |
| plasmid_lp38 | 30007 | BB_J41  | <b>0.667</b> ± 0.2133 0.100011 | <b>0.68</b> ± 0.436 0.48077   | <b>1.018</b> ± 0.3311 0.74764 | <b>1.194</b> ± 1.5424 0.26925 | CAATAAAAAATGTTGATAACATTAATAAGATAATAAAGCGCTAGCAAAAACA  |
| plasmid_lp38 | 30142 | BB_J41  | <b>1.468</b> ± 1.3869 0.556071 | <b>1.449</b> ± 1.4162 0.59818 | <b>1.377</b> ± 0.5947 0.27588 | <b>1.617</b> ± 0.6391 0.09262 | CGTGCTTCTAGATGAAGTTGAATATCCCTTGATGTTTCTAAAAATTGACC    |
| plasmid_lp38 | 30323 | BB_J41  | <b>1.328</b> ± 0.6093 0.305327 | <b>1.183</b> ± 0.4914 0.45854 | <b>0.731</b> ± 0.3597 0.33323 | <b>1.263</b> ± 0.2595 0.22836 | AAAACATCATCTTGTTTAAAGTTTAAAGCTCTAGAAAATCATATTTAGCA    |
| plasmid_lp38 | 30872 | IG 1356 | <b>2.852</b> ± 2.8414 0.28299  | <b>3.205</b> ± 2.4135 0.02968 | <b>1.306</b> ± 1.4781 0.78019 | <b>1.451</b> ± 1.4291 0.53865 | ATATTAAGAAATTAATTTCCATTGATGTTTTAGCGTAAATTTAGATTGCA    |
| plasmid_lp38 | 31385 | BB_J43  | <b>4.508</b> ± 2.7041 0.083623 | <b>2.327</b> ± 1.3476 0.22302 | <b>2.104</b> ± 1.0185 0.05229 | <b>2.104</b> ± 1.2331 0.25569 | TTCTCAATTTAAGCTTAAATGATTTTATTTTAAATAGTTAGGCAAAAT      |
| plasmid_lp38 | 31490 | BB_J43  | <b>1.378</b> ± 0.795 0.109508  | <b>1.731</b> ± 1.4521 0.30832 | <b>0.845</b> ± 0.4385 0.18788 | <b>1.18</b> ± 0.891 0.52197   | GAACCAGAAATGGTTTTTGAGTTTTATTATTTTCTAATTTATTCTGTC      |
| plasmid_lp38 | 31597 | BB_J43  | <b>0.581</b> ± 0.5893 0.039578 | <b>0.846</b> ± 0.8536 0.32373 | <b>0.851</b> ± 0.6574 0.10571 | <b>0.977</b> ± 0.7337 0.79145 | TTTATCCCCTGGCTTTATTTTCAAGCATCTTTTAAATGAAGTTGATTACT    |

|              |       |         |                                |                               |                               |                               |                                                        |
|--------------|-------|---------|--------------------------------|-------------------------------|-------------------------------|-------------------------------|--------------------------------------------------------|
| plasmid_lp38 | 31857 | BB_J43  | <b>0.376</b> ± 0.3707 0.351477 | <b>0.742</b> ± 0.8863 0.74704 | <b>2.118</b> ± 1.5381 0.01533 | <b>1.297</b> ± 1.3059 0.4944  | AAAACGTCATTTTCAAAGCTAATAATATCTAAGACCAAGCAAAAATCTA      |
| plasmid_lp38 | 32042 | BB_J43  | <b>0.150</b> ± 0.1568 0.117836 | <b>1.232</b> ± 1.5571 0.80413 | <b>0.598</b> ± 0.9896 0.50092 | <b>0.79</b> ± 0.7624 0.74572  | AAGAACATTTCTTAAAGAATTAATAAATTTTTCAAAAATAGAAATTCGAAGG   |
| plasmid_lp38 | 32055 | BB_J43  | <b>0.536</b> ± 0.5165 0.245917 | <b>0.505</b> ± 0.4871 0.30469 | <b>0.583</b> ± 0.3263 0.37449 | <b>0.772</b> ± 0.4357 0.53734 | TTTGACACCTTTAAAGAACATTTCTTAAAGAATTAATAAATTTTTCAAAA     |
| plasmid_lp38 | 32193 | IG 1357 | <b>1.705</b> ± 1.3236 0.315962 | <b>1.941</b> ± 1.5948 0.29915 | <b>1.078</b> ± 0.8778 0.9147  | <b>2.268</b> ± 1.9914 0.41064 | ATACACTCATCTTGAATATAACATGAAAAAATAAATATGCGCAACTAGAAA    |
| plasmid_lp38 | 32284 | IG 1358 | <b>1.227</b> ± 0.6896 0.649941 | <b>1.917</b> ± 1.5359 0.26152 | <b>0.789</b> ± 0.4392 0.22396 | <b>0.996</b> ± 0.6613 0.99417 | TAACAAAATAATTTGGCAGTTCATTTAACTTTACATTTGATAGATAAAAATAGA |
| plasmid_lp38 | 32432 | IG 1359 | <b>0.921</b> ± 0.4675 0.714027 | <b>1.69</b> ± 1.3888 0.26955  | <b>1.055</b> ± 0.5482 0.76435 | <b>0.969</b> ± 0.4978 0.85291 | AATATATTTTCATCATATTTAAACCTCTCTTACAAGAGTAATTTACATCA     |
| plasmid_lp38 | 32657 | BB_J45  | <b>1.648</b> ± 0.9663 0.335421 | <b>2.496</b> ± 3.749 0.49955  | <b>1.23</b> ± 0.7686 0.49585  | <b>0.948</b> ± 0.8947 0.8953  | AGTAGTAAAAAGGGGAATGCTAGTATAGCATTGGGAGAGGTTCCCTCACTT    |
| plasmid_lp38 | 32679 | BB_J45  | <b>0.559</b> ± 0.3973 0.250303 | <b>0.489</b> ± 0.5178 0.4673  | <b>1.039</b> ± 0.832 0.64369  | <b>1.086</b> ± 0.9774 0.37838 | CTAGCATTTCCCTTTTTACTACTTAAAACTATCTTTAGATCCCTTGGCA      |
| plasmid_lp38 | 32776 | BB_J45  | <b>0.286</b> ± 0.3672 0.046703 | <b>0.18</b> ± 0.08 0.01893    | <b>0.194</b> ± 0.2476 0.01571 | <b>0.5</b> ± 0.4351 0.15339   | TGATGCCTCATATCTCTTTTCAGACAATTAAGATCGGGGATAGGTAGAAT     |
| plasmid_lp38 | 32870 | BB_J45  | <b>1.130</b> ± 0.4035 0.546915 | <b>1.383</b> ± 0.5902 0.29312 | <b>0.962</b> ± 0.1972 0.47209 | <b>1.068</b> ± 0.2973 0.66467 | AATGATAGCGATAATGATAATTTTGATGATAATATCTGCGAGAAAAATAAG    |
| plasmid_lp38 | 32889 | BB_J45  | <b>1.159</b> ± 0.3038 0.121718 | <b>1.637</b> ± 0.9595 0.29339 | <b>0.895</b> ± 0.146 0.29569  | <b>1.134</b> ± 0.2703 0.10962 | ATTTTGATGATAATATCTGCGAGAAAAATAAGAAAGGTGATAGTAATTTA     |
| plasmid_lp38 | 32964 | BB_J45  | <b>0.620</b> ± 0.8925 0.59221  | <b>1.078</b> ± 1.2006 0.93074 | <b>0.957</b> ± 1.0253 0.9316  | <b>0.723</b> ± 0.5733 0.16232 | GTTGTCTATAATGAGCTTGAATCTTATCTCTAAGACAAAAGAAAAGATT      |
| plasmid_lp38 | 33247 | IG 1360 | <b>1.284</b> ± 1.7484 0.459497 | <b>3.492</b> ± 3.9777 0.14585 | <b>1.088</b> ± 0.941 0.86937  | <b>1.824</b> ± 1.6328 0.03815 | ATTAGTGTGTATTTATATAGGTGATAAGTTAAAGCACATCTACTGTACTT     |
| plasmid_lp38 | 33260 | IG 1361 | <b>0.624</b> ± 0.527 0.162207  | <b>0.773</b> ± 0.6439 0.44008 | <b>0.803</b> ± 0.2673 0.00028 | <b>1.073</b> ± 0.2753 0.3809  | AATACAACACTAATTAATACATAAATAGAAATGATTATTTTCATAATATAC    |
| plasmid_lp38 | 33263 | IG 1362 | <b>0.851</b> ± 0.8129 0.717336 | <b>0.54</b> ± 0.5143 0.06164  | <b>0.764</b> ± 0.3259 0.49853 | <b>0.98</b> ± 0.4629 0.84879  | TATAGGTGATAAGTTAAAGCACATCTACTGTACTTTAACTATTGTTATAGC    |
| plasmid_lp38 | 33448 | IG 1363 | <b>1.378</b> ± 0.6941 0.183806 | <b>1.957</b> ± 1.4562 0.14108 | <b>0.749</b> ± 0.4582 0.23524 | <b>1.072</b> ± 0.6168 0.77304 | ATTCATTTATAGTAAAGCTTTATTGTAAATAAATTTAAATAAAAAAAGGT     |
| plasmid_lp38 | 33610 | IG 1364 | <b>0.734</b> ± 0.2984 0.119543 | <b>0.926</b> ± 0.3414 0.48514 | <b>0.761</b> ± 0.2533 0.08219 | <b>0.834</b> ± 0.2726 0.38401 | TTGTAAGAAGAAAGTCGACAATTTTGATACTACTTAAAGGTTTGGATTAT     |
| plasmid_lp38 | 33827 | IG 1365 | <b>1.775</b> ± 1.9325 0.590974 | <b>2.089</b> ± 3.8329 0.66085 | <b>2.811</b> ± 3.4251 0.42493 | <b>1.362</b> ± 1.2758 0.57814 | TAATATGTCTTTTTTCATAAAAAATTTCTCTTGGTAATTTTTTATATCCGAA   |
| plasmid_lp38 | 33829 | IG 1366 | <b>1.356</b> ± 0.9841 0.106812 | <b>1.657</b> ± 1.4886 0.26538 | <b>0.87</b> ± 0.5976 0.35148  | <b>1.064</b> ± 0.7963 0.5397  | TTATATACTTTGAACGTATTTTTATATATCATTACTTTATTCGTTTCT       |
| plasmid_lp38 | 34175 | IG 1367 | <b>2.045</b> ± 1.3316 0.117182 | <b>1.873</b> ± 1.9752 0.42164 | <b>0.838</b> ± 0.4753 0.43146 | <b>0.661</b> ± 0.4737 0.36849 | TACTTATAAACCTTTTTAATAAAAAACAAAATTTTATATAAACCTCAATAA    |
| plasmid_lp38 | 34398 | BB_J46  | <b>1.379</b> ± 1.9694 0.809137 | <b>0.236</b> ± 0.3878 0.16726 | <b>0.883</b> ± 1.0242 0.8985  | <b>0.211</b> ± 0.2374 0.23787 | TATGGACTAAAAAAATCCCAAATCTAATGTAGTTTACAACCGATTATTTT     |
| plasmid_lp38 | 34566 | BB_J46  | <b>1.054</b> ± 1.2375 0.922184 | <b>1.241</b> ± 1.8724 0.54149 | <b>0.408</b> ± 0.5024 0.38093 | <b>1.025</b> ± 1.343 0.96566  | CATGGCATAATAAATCCCATCTTATAAAGAAATTCAAAATCCATAAACCAAC   |
| plasmid_lp38 | 34632 | BB_J46  | <b>1.553</b> ± 0.543 0.25735   | <b>1.432</b> ± 0.4238 0.23287 | <b>1.097</b> ± 0.3958 0.69606 | <b>1.31</b> ± 0.2713 0.18256  | TTATTGGAGGATGATTAGATGTTAAAAATTTATCCATATTGTTTCAGACCT    |
| plasmid_lp38 | 34709 | IG 1368 | <b>1.265</b> ± 0.3147 0.225003 | <b>1.237</b> ± 0.3923 0.19707 | <b>0.861</b> ± 0.4243 0.46883 | <b>0.884</b> ± 0.2796 0.53139 | AATATATAGCAATAATAAGGCAGTAGCTTTTTTACATAAAAAATGTTTT      |
| plasmid_lp38 | 34942 | BB_J47  | <b>2.771</b> ± 1.6502 0.131928 | <b>0.901</b> ± 0.4801 0.57191 | <b>0.977</b> ± 0.6859 0.96085 | <b>1.092</b> ± 1.1097 0.8647  | ATTTTCAAACCCAGAAAAGGAGAATGTTCTTACTAAGAAATTAAGAAT       |
| plasmid_lp38 | 35218 | BB_J47  | <b>0.812</b> ± 1.1213 0.869472 | <b>0.369</b> ± 0.5396 0.54324 | <b>0.611</b> ± 0.9131 0.73604 | <b>0.572</b> ± 0.8608 0.70703 | CCATTAATAAATAACATTTTTAAAATTCATAAAAAATCCATTATCAACTACG   |
| plasmid_lp38 | 35318 | BB_J47  | <b>2.310</b> ± 2.6563 0.348729 | <b>1.278</b> ± 1.4796 0.76187 | <b>1.558</b> ± 1.7922 0.46684 | <b>2.941</b> ± 2.6286 0.26565 | GATAAAACAAAATCTGCTAAATTTCTTATCCATCTTATCATATGGAGTTTGTCT |
| plasmid_lp38 | 36100 | BB_J48  | <b>1.407</b> ± 1.3703 0.436056 | <b>2.31</b> ± 2.7032 0.36793  | <b>1.185</b> ± 0.9824 0.62572 | <b>1.311</b> ± 1.051 0.63196  | CTTTGATGTAATAATCAATCTTTCTGAGGGAACAATAAAGGGCTACTA       |
| plasmid_lp38 | 36259 | IG 1369 | <b>1.344</b> ± 1.159 0.232108  | <b>1.901</b> ± 2.0632 0.33473 | <b>0.791</b> ± 0.5913 0.19533 | <b>1.091</b> ± 0.9026 0.38169 | AATAAATATAGCACAAAAAATCTTTATATATATTTCTCTTATTTTAAA       |
| plasmid_lp38 | 36553 | BB_J50  | <b>1.531</b> ± 1.0297 0.346394 | <b>1.948</b> ± 1.9187 0.43749 | <b>1.287</b> ± 0.7027 0.36877 | <b>1.238</b> ± 0.6687 0.41174 | AATAAGTGATATGTTTTCCACCATATTTTTTCATAAAAAAACATTTCCA      |
| plasmid_lp38 | 37386 | IG 1370 | <b>0.715</b> ± 0.7129 0.641764 | <b>1.631</b> ± 0.384 0.00626  | <b>0.703</b> ± 0.404 0.19222  | <b>0.838</b> ± 0.4557 0.68838 | TTAAAAATGCTGATCTTACTTTATTTTTTCAATGTATAGTCTTGGCTATT     |
| plasmid_lp38 | 37527 | BB_J51  | <b>0.677</b> ± 0.1137 0.098602 | <b>0.792</b> ± 0.1396 0.06582 | <b>0.894</b> ± 0.2649 0.42096 | <b>0.963</b> ± 0.2682 0.64803 | TTATCACCATCACCCTTGGTTTTCGACCATTTTTCACAGCAAAATCCCCG     |
| plasmid_lp38 | 38593 | IG 1371 | <b>2.452</b> ± 1.1498 0.048544 | <b>2.806</b> ± 2.8429 0.31608 | <b>1.154</b> ± 0.5896 0.09648 | <b>1.936</b> ± 1.1654 0.13791 | TATACTTGAACCTAAAGGGGGGGCATATTAGTTAAGATAAATTTCTTATAT    |
| plasmid_lp38 | 38613 | IG 1372 | <b>1.929</b> ± 1.5133 0.302002 | <b>4.025</b> ± 4.044 0.29125  | <b>1.041</b> ± 0.789 0.91252  | <b>1.19</b> ± 0.8198 0.70532  | TAGCACTATTATATGATGTAATAAATAAATTTAATGATTTTGTAAATATA     |
| plasmid_lp38 | 38623 | IG 1373 | <b>1.612</b> ± 0.9968 0.130842 | <b>2.168</b> ± 2.3699 0.39343 | <b>0.974</b> ± 0.5641 0.61792 | <b>1.228</b> ± 0.656 0.23907  | TAATATGCTATATATTGTATAATATGCTATATACTTGAACCTAAAGGGGG     |
| plasmid_lp5  | 436   | BB_T01  | <b>1.793</b> ± 1.993 0.316885  | <b>1.691</b> ± 2.5346 0.46975 | <b>0.926</b> ± 0.8647 0.84202 | <b>1.203</b> ± 1.2146 0.1239  | ATATATCAACAATGAAAAAATCTTAAATCAATTAAGAAAAAATAAAAA       |
| plasmid_lp5  | 480   | BB_T01  | <b>1.512</b> ± 1.3425 0.273634 | <b>2.146</b> ± 3.0352 0.43673 | <b>0.356</b> ± 0.3034 0.1509  | <b>0.544</b> ± 0.4348 0.24693 | TTTTTTTTCTAATTGATTTAAGTATTTTTTCACTGTTGATATTTACTAG      |
| plasmid_lp5  | 628   | BB_T01  | <b>2.336</b> ± 2.3118 0.416273 | <b>1.679</b> ± 0.7479 0.09317 | <b>1.092</b> ± 0.3513 0.60496 | <b>1.047</b> ± 0.4261 0.89156 | ATGTTCTTTTGTGTAATTTGTTTAAATCTTTGTAGAAATTTTTTGTAGAAT    |
| plasmid_lp5  | 634   | BB_T01  | <b>4.454</b> ± 2.131 0.022631  | <b>1.244</b> ± 1.5402 0.80179 | <b>1.59</b> ± 2.8211 0.71038  | <b>0.288</b> ± 0.5108 0.01963 | CTTAATTGTAATAACATTTATAAATAATCTTATGCAAATTTTGAAGAATAC    |
| plasmid_lp5  | 693   | IG 1374 | <b>3.914</b> ± 0.717 0.01429   | <b>2.44</b> ± 1.0165 0.1255   | <b>1.263</b> ± 0.6481 0.58047 | <b>1.252</b> ± 0.3196 0.23159 | AAGATATATATTTTTTAAATAAATAAATAAATTTGCTGGCACCAATAT       |
| plasmid_lp5  | 721   | IG 1375 | <b>2.614</b> ± 1.7563 0.227174 | <b>2.153</b> ± 1.6889 0.22865 | <b>0.983</b> ± 1.1142 0.98475 | <b>1.358</b> ± 0.7767 0.51475 | TTATTTATTTAAATAAATAATATATCTTTACAATTTGATTTTCTAATAT      |
| plasmid_lp5  | 907   | BB_T02  | <b>1.610</b> ± 1.4369 0.58142  | <b>0.591</b> ± 0.5097 0.40216 | <b>0.262</b> ± 0.1947 0.12446 | <b>0.636</b> ± 0.3242 0.39467 | GATATTGCAACTAGTAAGATATTGAAATAGACATAGACTACTAATAA        |
| plasmid_lp5  | 1190  | IG 1376 | <b>1.306</b> ± 0.4706 0.401358 | <b>1.406</b> ± 0.7288 0.47901 | <b>0.572</b> ± 0.1213 0.08681 | <b>0.767</b> ± 0.2912 0.06958 | ATAGGGGGCTAATTCATTATGAATGGAATAATTAAACGATACACTGTTCCGA   |
| plasmid_lp5  | 1344  | BB_T03  | <b>2.898</b> ± 1.6949 0.028507 | <b>1.728</b> ± 1.3691 0.1751  | <b>1.086</b> ± 0.5552 0.75757 | <b>1.043</b> ± 0.96 0.88678   | TAATCTTTGTTTTCACTATAGAACAATCTTGATTCATGTACTAGTGT        |
| plasmid_lp5  | 1410  | BB_T03  | <b>5.695</b> ± 3.2071 0.068999 | <b>2.451</b> ± 2.5898 0.35956 | <b>3.449</b> ± 2.3467 0.14772 | <b>2.057</b> ± 0.8934 0.10837 | ATTATAAAACCCTATTAGAATATCTTGAATATTAGAAAAAATCCAAAAG      |
| plasmid_lp5  | 1416  | BB_T03  | <b>2.729</b> ± 0.6105 0.019825 | <b>1.171</b> ± 0.483 0.58267  | <b>0.996</b> ± 0.3458 0.98548 | <b>1.058</b> ± 0.57 0.89306   | AAACCCTATTAGAATATCTTGAATATTAGAAAAAATCCAAAAGTAATCG      |
| plasmid_lp5  | 1658  | IG 1377 | <b>1.547</b> ± 1.6854 0.679598 | <b>0.313</b> ± 0.5717 0.38543 | <b>2.616</b> ± 3.5004 0.37814 | <b>1.557</b> ± 1.6366 0.63258 | TTATAGGCCATAATATACTAGGATAGATATTGGTTTACTTTTATATAATC     |
| plasmid_lp5  | 1709  | IG 1378 | <b>3.276</b> ± 3.0681 0.323538 | <b>1.366</b> ± 1.0395 0.61829 | <b>0.588</b> ± 0.7673 0.59125 | <b>0.576</b> ± 0.33 0.20094   | GTCCTTTATGGATTGATCATTTATAGATCAAAATATTCTTTATGGGCCTA     |
| plasmid_lp5  | 1754  | IG 1379 | <b>2.573</b> ± 1.297 0.081918  | <b>1.571</b> ± 0.6911 0.11629 | <b>0.994</b> ± 0.3009 0.97715 | <b>1.123</b> ± 0.507 0.26002  | CCAATATAAGCTAAATACAAAATAAATCCAATATATCTTTAAATTTCTAGA    |

|              |       |         |                                 |                               |                               |                               |                                                      |
|--------------|-------|---------|---------------------------------|-------------------------------|-------------------------------|-------------------------------|------------------------------------------------------|
| plasmid_lp5  | 1765  | IG 1380 | <b>1.579</b> ± 0.7468 0.357344  | <b>1.144</b> ± 1.0372 0.78903 | <b>0.559</b> ± 0.3295 0.06169 | <b>0.681</b> ± 0.2776 0.14618 | GCTTTATATTGGTAATTAAGTAATTTATTTATGTTCAAATCCATAAAAGAC  |
| plasmid_lp5  | 1877  | IG 1381 | <b>3.377</b> ± 4.1599 0.0210555 | <b>1.088</b> ± 2.0584 0.77128 | <b>1.224</b> ± 2.091 0.87607  | <b>0.822</b> ± 1.2213 0.78329 | ACACTAATTTTCCCAGTTTAAAGTTTTATTTTGTGGGCACTATAAATAAT   |
| plasmid_lp5  | 3173  | BB_T04  | <b>4.789</b> ± 6.1545 0.202183  | <b>1.612</b> ± 1.6304 0.47033 | <b>1.261</b> ± 1.4489 0.1306  | <b>1.628</b> ± 1.6295 0.10288 | TATGCCAAAATATTTTGTGTATTTTATTTTGTGGTATTCAAATATTC      |
| plasmid_lp5  | 3174  | BB_T04  | <b>3.016</b> ± 2.2858 0.146225  | <b>1.757</b> ± 0.9587 0.07538 | <b>1.168</b> ± 0.6551 0.45523 | <b>1.392</b> ± 0.6591 0.04085 | TATTATCTTGAATTACTAGAATAATAAAAAATAGAAAACATGATCAAAAT   |
| plasmid_lp5  | 3322  | IG 1382 | <b>0.713</b> ± 0.75 0.434408    | <b>0.338</b> ± 0.4917 0.03061 | <b>1.231</b> ± 1.0594 0.6796  | <b>0.665</b> ± 0.5559 0.15642 | TGGAATAATTCGTATTTTTGAACCTAATTTCTGCACATACTAAAATAAAC   |
| plasmid_lp5  | 3673  | BB_T06  | <b>3.179</b> ± 1.673 0.070021   | <b>1.604</b> ± 0.7517 0.23976 | <b>1.195</b> ± 0.5948 0.43109 | <b>1.002</b> ± 0.4819 0.9944  | GATACAGTGGCAATAAGAATCCCAAAAAATAAACCCGCATTAATTTAATT   |
| plasmid_lp5  | 4028  | BB_T06  | <b>5.780</b> ± 5.0644 0.133248  | <b>2.192</b> ± 2.3241 0.3854  | <b>1.84</b> ± 1.2842 0.20483  | <b>1.686</b> ± 1.6926 0.44753 | TAAGAAAACATTTTTTAAAGTCTATTTTTGTTTCCCTTTCGATAATTTACT  |
| plasmid_lp5  | 4094  | BB_T06  | <b>2.420</b> ± 2.8602 0.439011  | <b>0.419</b> ± 0.7663 0.00914 | <b>0.631</b> ± 0.6851 0.4555  | <b>0.048</b> ± 0.0894 0.10181 | TTCGTTTTAAATATTTCTTATGTTATCCCGCGTTTTAAATGATGGACA     |
| plasmid_lp5  | 4168  | BB_T06  | <b>3.551</b> ± 2.8229 0.190719  | <b>1.774</b> ± 1.4483 0.31849 | <b>1.239</b> ± 0.7464 0.33785 | <b>1.243</b> ± 0.862 0.44574  | TAATATTTTTTTTATCCCATAAAAAACTAAAAATAAAATTTAAAAAGTGT   |
| plasmid_lp5  | 4171  | BB_T06  | <b>0.806</b> ± 0.3975 0.253202  | <b>0.469</b> ± 0.1961 0.1657  | <b>0.322</b> ± 0.1868 0.15859 | <b>0.549</b> ± 0.4617 0.37203 | TTATTCGATCTTAAATAGAATATGCAGAAAACTTTATAAAGAGCTAGTA    |
| plasmid_lp5  | 4666  | BB_T07  | <b>1.484</b> ± 0.2615 0.104209  | <b>1.239</b> ± 0.3016 0.36384 | <b>1.066</b> ± 0.3072 0.7164  | <b>0.942</b> ± 0.171 0.67942  | TTTATGCTTGATGATGATGATGATTTTTTAAACTTTTGATGTTGCTTGATAA |
| plasmid_lp5  | 4898  | IG 1383 | <b>2.580</b> ± 2.496 0.308952   | <b>2.363</b> ± 2.6285 0.41516 | <b>0.924</b> ± 0.4728 0.74059 | <b>1.18</b> ± 0.8992 0.71     | TTATCTATTATGTAATATACAAGATTCACGTTTTGATGTTGCAGTAAAG    |
| plasmid_lp5  | 5011  | IG 1384 | <b>2.478</b> ± 1.9244 0.294741  | <b>2.258</b> ± 1.4352 0.27195 | <b>0.95</b> ± 0.3415 0.27127  | <b>1.073</b> ± 0.5771 0.88033 | CTACTCTAGAAGAGTTTTCTCTTTTTTATGTAATTTATGCACTTATTTTT   |
| plasmid_lp54 | 325   | IG 1385 | <b>1.154</b> ± 0.6865 0.610907  | <b>1.973</b> ± 1.8711 0.41311 | <b>0.831</b> ± 0.2805 0.40802 | <b>0.989</b> ± 0.2454 0.79532 | TTTTTATTTCTTATTGAGCTTGATTAATCTTAAATTTATCTCTTCTT      |
| plasmid_lp54 | 407   | IG 1386 | <b>0.765</b> ± 0.28 0.27991     | <b>1.69</b> ± 1.1357 0.46003  | <b>0.934</b> ± 0.4843 0.88321 | <b>1.309</b> ± 0.8102 0.54946 | AATTCGAATTAATTATATGCTCCTTTGAAAACCTGCTTTCAAGAGCTA     |
| plasmid_lp54 | 567   | IG 1387 | <b>0.523</b> ± 0.1744 0.149728  | <b>0.44</b> ± 0.4003 0.26111  | <b>0.933</b> ± 0.3349 0.40379 | <b>0.745</b> ± 0.2649 0.17775 | TGCTTGCAATAAATTAATTAATTTATTTATAAATTCGCGCTAATATTTTAC  |
| plasmid_lp54 | 1105  | BB_A01  | <b>1.153</b> ± 0.4109 0.523019  | <b>1.713</b> ± 0.6713 0.06053 | <b>1.603</b> ± 0.6175 0.22032 | <b>1.623</b> ± 0.7641 0.08686 | GGATCCCAATTATCGTTTTAAAAAAGTTATTAATTAATAATAGATAATAA   |
| plasmid_lp54 | 1458  | IG 1388 | <b>1.986</b> ± 0.9238 0.017089  | <b>1.149</b> ± 0.9299 0.70753 | <b>0.792</b> ± 0.6061 0.53232 | <b>1.504</b> ± 0.7751 0.38204 | TAGTCTCCTAAAAAGATTTTTAATTAATTAATTAATAGTAATTAAGCATT   |
| plasmid_lp54 | 1808  | BB_A03  | <b>0.687</b> ± 1.0307 0.680704  | <b>1.025</b> ± 1.7574 0.98214 | <b>0.195</b> ± 0.2881 0.0129  | <b>0.261</b> ± 0.1676 0.04027 | TTTACTCTTTTACTGCTGATAGAAATTTTGTACAGATCTTCTATTTT      |
| plasmid_lp54 | 2129  | BB_A04  | <b>0.947</b> ± 0.9365 0.948923  | <b>2.296</b> ± 3.6814 0.44264 | <b>1.079</b> ± 1.0108 0.86532 | <b>1.103</b> ± 1.2382 0.87541 | AAGCTGAGAATCAAGCGTAATCTGTAACCTTTTTCATTTTTGGATATTG    |
| plasmid_lp54 | 2796  | BB_A04  | <b>1.256</b> ± 0.8589 0.683943  | <b>3.859</b> ± 4.8261 0.41849 | <b>0.883</b> ± 0.5431 0.82739 | <b>2.147</b> ± 1.8919 0.43121 | GAGAAAGTGATCAGATAGGCGGGGTCAAGAAAATAGAGCCTGGGGGCGA    |
| plasmid_lp54 | 2986  | IG 1389 | <b>1.017</b> ± 1.0587 0.97298   | <b>2.254</b> ± 3.8108 0.4297  | <b>1.412</b> ± 1.5567 0.06962 | <b>0.976</b> ± 1.0326 0.95003 | AAATCAAAAATAAAAACCTTTAACGCTGCTAATCTCTTTTATCAAGCTGTT  |
| plasmid_lp54 | 4436  | IG 1390 | <b>0.966</b> ± 0.6157 0.931025  | <b>1.438</b> ± 1.0199 0.25439 | <b>0.758</b> ± 0.5978 0.60228 | <b>1.55</b> ± 1.1515 0.53424  | GGCTTAAAACCTTTATTTAAGCTATTTTAAATTTGTTTTTATTTAAAAAAA  |
| plasmid_lp54 | 4565  | IG 1391 | <b>0.643</b> ± 0.9948 0.688675  | <b>0.773</b> ± 1.6268 0.17645 | <b>1.021</b> ± 1.768 0.93799  | <b>0.923</b> ± 1.7036 0.38115 | TTGAAAATTTAAATTTTGTAAATTTAGATGATGTAATGATTTTAAATTA    |
| plasmid_lp54 | 5150  | IG 1392 | <b>0.964</b> ± 1.49 0.409635    | <b>1.491</b> ± 2.3376 0.30263 | <b>0.911</b> ± 1.3586 0.50479 | <b>0.89</b> ± 1.181 0.68049   | TGGGAGACGTATGAAAATATTTTATTTATTTGTTATTTTATTCTTTTC     |
| plasmid_lp54 | 6127  | BB_A09  | <b>0.915</b> ± 0.4741 0.660661  | <b>1.53</b> ± 1.1906 0.21429  | <b>0.771</b> ± 0.3968 0.3489  | <b>1.13</b> ± 0.6567 0.17468  | TCAATCTCAATGTCGCTTTAAAAACTGTTCCGCTGGCCGTGTATAGTAG    |
| plasmid_lp54 | 6541  | BB_A10  | <b>0.765</b> ± 0.5314 0.560399  | <b>0.849</b> ± 0.4569 0.43811 | <b>0.53</b> ± 0.304 0.18776   | <b>0.581</b> ± 0.3702 0.156   | TTTTGGTATCTCTTTATTCATTTTTTATCTCTGTAATAAGAAGCCTTTTG   |
| plasmid_lp54 | 6963  | BB_A10  | <b>1.050</b> ± 0.4254 0.872272  | <b>1.386</b> ± 0.7795 0.44153 | <b>0.851</b> ± 0.2686 0.54002 | <b>1.069</b> ± 0.5666 0.85669 | TTAGCAGTTATTTTTTAGCTGTTTTGATTTTTGCTGCAATATTAAT       |
| plasmid_lp54 | 7499  | BB_A11  | <b>0.890</b> ± 0.3923 0.388059  | <b>1.373</b> ± 0.944 0.28226  | <b>0.916</b> ± 0.4152 0.39429 | <b>1.07</b> ± 0.5619 0.11465  | ACTTGAAAAACATAGATTTTGTACTGTTTTAGAAAAGTTAAATCTACACT   |
| plasmid_lp54 | 7563  | BB_A11  | <b>0.487</b> ± 0.1384 0.059119  | <b>1.17</b> ± 0.866 0.78715   | <b>0.639</b> ± 0.3748 0.32738 | <b>0.745</b> ± 0.1879 0.2617  | AAGCACACAAACAAAAGCCATCTTCAAACAAAATTTCAATTTACAACCTCA  |
| plasmid_lp54 | 7841  | BB_A11  | <b>0.282</b> ± 0.3475 0.229804  | <b>0.305</b> ± 0.3725 0.25992 | <b>0.351</b> ± 0.5704 0.45434 | <b>0.795</b> ± 0.9808 0.84053 | AATTTGAGAGATTCCTATTTGGTGGCAAGGAAAACCATACGACTTTGGGGG  |
| plasmid_lp54 | 8162  | BB_A11  | <b>0.677</b> ± 0.9116 0.744251  | <b>0.175</b> ± 0.3274 0.19771 | <b>0.468</b> ± 0.8775 0.18671 | <b>1.55</b> ± 1.6071 0.66236  | TGTTTTAAGTGTGGCATGTTTTGAGAAGAAAATGAAGCTATTAATAATTTT  |
| plasmid_lp54 | 8485  | BB_A13  | <b>0.757</b> ± 0.705 0.500076   | <b>2.186</b> ± 1.3961 0.21716 | <b>0.627</b> ± 0.5133 0.17779 | <b>0.65</b> ± 0.4706 0.16368  | TTTAAAGCGTCAATGCCAGAGTTGATATTCATTTTATTGTTTATTTTTTT   |
| plasmid_lp54 | 8595  | BB_A13  | <b>1.539</b> ± 1.3198 0.575669  | <b>2.041</b> ± 1.9483 0.48513 | <b>1.927</b> ± 1.0336 0.29322 | <b>1.174</b> ± 0.5591 0.5236  | CTTTGTAGATGCTCATTATAGATTGTAAGATTAAAGCCCAATATATAC     |
| plasmid_lp54 | 8947  | BB_A14  | <b>0.915</b> ± 0.9679 0.851822  | <b>0.897</b> ± 0.4253 0.43004 | <b>0.505</b> ± 0.2147 0.05887 | <b>1.004</b> ± 0.4252 0.93126 | TCATCCCCACAAGAGTCAACACTAAAGCCTTAAAGCTTATACGAAGCGCAT  |
| plasmid_lp54 | 8951  | BB_A14  | <b>0.554</b> ± 0.1786 0.104209  | <b>0.696</b> ± 0.504 0.52341  | <b>1.26</b> ± 0.4059 0.36659  | <b>1.091</b> ± 0.4873 0.83137 | GATGATGGTTCTCTGGAAGCTTACTATTGTAGAGCATGAAAAAATTATA    |
| plasmid_lp54 | 11279 | IG 1393 | <b>1.386</b> ± 0.3275 0.158489  | <b>1.699</b> ± 0.8082 0.30133 | <b>0.947</b> ± 0.2776 0.74606 | <b>1.331</b> ± 0.5126 0.33452 | TTCCAGAAGTAACAAATGAAAAATATATAAATTTCAATTTTTAGGTTGTAA  |
| plasmid_lp54 | 11458 | IG 1394 | <b>2.833</b> ± 1.7496 0.010798  | <b>2.753</b> ± 2.4314 0.29936 | <b>1.447</b> ± 1.2783 0.63222 | <b>1.03</b> ± 0.8 0.88233     | TTGAATGAAGGATAAATAAATAAATAATCTAAATTTCTTAATAAAAAATAAA |
| plasmid_lp54 | 11518 | IG 1395 | <b>0.851</b> ± 0.4197 0.475169  | <b>1.754</b> ± 1.9478 0.46963 | <b>0.854</b> ± 0.4652 0.20104 | <b>1.186</b> ± 0.6189 0.64141 | TAGCGATGGGTTTAAATTTTAAAGAATTTAGATTATTTTATTTTATCT     |
| plasmid_lp54 | 15465 | BB_A23  | <b>0.709</b> ± 0.5244 0.248768  | <b>1.082</b> ± 0.8005 0.81665 | <b>0.695</b> ± 0.3102 0.29257 | <b>1.204</b> ± 0.5285 0.48167 | AAATCCCAATAGTGCAAAGACAAAAAATAACACTCCGGCTTTTGAACGCTC  |
| plasmid_lp54 | 15649 | BB_A23  | <b>0.808</b> ± 0.9301 0.684838  | <b>0.957</b> ± 1.0836 0.92389 | <b>0.397</b> ± 0.438 0.44262  | <b>0.586</b> ± 0.6787 0.56577 | TTTGAATAACAGAGATTAAAGTGAAAGATCAGGTTTTGTGCATTTTCTT    |
| plasmid_lp54 | 15800 | BB_A23  | <b>0.499</b> ± 0.8481 0.625234  | <b>0.889</b> ± 1.4184 0.82817 | <b>0.844</b> ± 1.4092 0.89801 | <b>1.519</b> ± 2.04 0.68852   | CAACAAAAATAATTAATATCTTTTTGATGTTATTTGGAATTTCTTCTCT    |
| plasmid_lp54 | 16256 | BB_A24  | <b>0.583</b> ± 0.4273 0.209168  | <b>1.349</b> ± 0.6165 0.47466 | <b>0.99</b> ± 0.7517 0.98722  | <b>0.76</b> ± 0.343 0.39223   | TCCAGTTTTCTTGAGTTTAGTAGCTTCTCTTCTATTGCTATTACGAATTT   |
| plasmid_lp54 | 16973 | BB_A25  | <b>0.456</b> ± 0.2019 0.15055   | <b>1.284</b> ± 0.53 0.24895   | <b>0.541</b> ± 0.4061 0.33244 | <b>1.097</b> ± 0.3766 0.59152 | TCTATTATCTTAAGGAACCTTCTGTTTCAACAATGGCTGTACTTTTGTCT   |
| plasmid_lp54 | 17164 | BB_A25  | <b>3.098</b> ± 2.3281 0.167475  | <b>3.553</b> ± 5.779 0.52981  | <b>1.124</b> ± 1.4261 0.91404 | <b>0.628</b> ± 0.8152 0.60007 | TCTTGAATCGTCTCTAAGGATTTAAAAAACAATAATTTAAAAATAAAAAA   |
| plasmid_lp54 | 17278 | IG 1396 | <b>0.791</b> ± 0.9272 0.617165  | <b>1.68</b> ± 2.5557 0.34518  | <b>0.932</b> ± 1.0373 0.89568 | <b>1.237</b> ± 1.7576 0.13902 | AATTTAGTTAAATTTAAATTTTAGCCACCTTTATGAAAAATAAAATAAAT   |
| plasmid_lp54 | 17877 | IG 1397 | <b>0.588</b> ± 0.7868 0.690573  | <b>0.107</b> ± 0.2107 0.32168 | <b>0.124</b> ± 0.2387 0.34845 | <b>1.322</b> ± 2.1123 0.83447 | TTTGTTGTTAAACAACGATTTTTGATTTTTGTTTCTTGCTCTTGAGTAA    |
| plasmid_lp54 | 18257 | BB_A30  | <b>0.647</b> ± 0.5392 0.515542  | <b>1.184</b> ± 1.2309 0.04076 | <b>0.704</b> ± 0.5918 0.53646 | <b>0.831</b> ± 1.1375 0.52897 | TCCGGTGATTTCTGTTTGTAAAAAGAATTTCTTTCTAGCGACCTGGCAGAA  |
| plasmid_lp54 | 18578 | BB_A30  | <b>0.937</b> ± 0.3755 0.165916  | <b>1.471</b> ± 1.3684 0.52689 | <b>0.838</b> ± 0.2708 0.40775 | <b>1.254</b> ± 0.6988 0.57288 | AGCCTTGAAGAGAGCTTGTCTGATAGGATTAAGAAGAGAGAAGATTGAA    |

*dbpA*

*dbpB*

*dbpB*

|              |       |         |                                |                               |                               |                               |                                                      |
|--------------|-------|---------|--------------------------------|-------------------------------|-------------------------------|-------------------------------|------------------------------------------------------|
| plasmid_lp54 | 19164 | BB_A31  | <b>0.794</b> ± 0.0935 0.112892 | <b>1.237</b> ± 0.447 0.45143  | <b>0.753</b> ± 0.2111 0.04023 | <b>1.095</b> ± 0.1601 0.4798  | TTTACGGGGGTAAAAACAGAGATGCTTTTTCCAAGATTCTGGGGGCAATA   |
| plasmid_lp54 | 19680 | BB_A31  | <b>0.734</b> ± 0.7823 0.457851 | <b>1.561</b> ± 1.6177 0.08415 | <b>0.936</b> ± 0.8811 0.89308 | <b>1.333</b> ± 1.2906 0.55249 | GTGATAGTTTAATGCTTGCTTCCATTCAAGTTTTAATAGAAAAATTTCAATG |
| plasmid_lp54 | 19700 | BB_A31  | <b>2.351</b> ± 1.8852 0.233063 | <b>4.626</b> ± 4.7032 0.28097 | <b>1.681</b> ± 2.2371 0.54436 | <b>1.411</b> ± 1.4805 0.72703 | TCCATTCAAGTTTTAATAGAAAAATTTCAATGTAATACCGTTTACATTGAG  |
| plasmid_lp54 | 20553 | IG 1398 | <b>0.566</b> ± 0.5935 0.591769 | <b>0.749</b> ± 0.9393 0.70289 | <b>1.024</b> ± 1.0233 0.97385 | <b>0.96</b> ± 1.4778 0.97291  | TAAGCTAATTTTTTTTAAAGAGAGATTTTTTATTCATCAATTTTGGATTAGA |
| plasmid_lp54 | 21356 | BB_A33  | <b>0.900</b> ± 0.5387 0.821773 | <b>2.121</b> ± 1.5071 0.24079 | <b>1.133</b> ± 0.5508 0.46849 | <b>1.875</b> ± 0.8729 0.09443 | AAACAAAATATTAGAGATTTTTAAAATACAGCACGGGTTAGTAGAAAAAAG  |
| plasmid_lp54 | 21895 | BB_A34  | <b>0.579</b> ± 0.273 0.161916  | <b>0.451</b> ± 0.3874 0.33582 | <b>0.803</b> ± 0.512 0.04311  | <b>0.945</b> ± 0.5915 0.14978 | AGCTCATCAAGTTCAGGATTTGAATATCCGTAAAGATGCAAAATGTGAGTTT |
| plasmid_lp54 | 23488 | IG 1399 | <b>0.634</b> ± 0.5065 0.310663 | <b>1.572</b> ± 0.7268 0.13652 | <b>0.772</b> ± 0.2755 0.19301 | <b>1.28</b> ± 0.8489 0.65339  | CTTAAGGCCTTATTTGTAGTTTTAAAATAAAAAATGCGCTTTTTAAGCCT   |
| plasmid_lp54 | 23489 | IG 1400 | <b>0.293</b> ± 0.3853 0.235887 | <b>0.437</b> ± 0.6268 0.18117 | <b>0.481</b> ± 0.5067 0.4311  | <b>1.172</b> ± 0.9705 0.70148 | ACCCATTTGTAGTTTTAAAGAAGTTTTCAATGTAATGTTGATTATAACA    |
| plasmid_lp54 | 24047 | BB_A36  | <b>0.671</b> ± 0.3078 0.005758 | <b>1.357</b> ± 1.1235 0.54859 | <b>0.531</b> ± 0.2551 0.03849 | <b>0.87</b> ± 0.4607 0.43652  | TTTTTTGATTGGCTTTCTAAGGATGTTAACAGACAAAAGATTTATAAGC    |
| plasmid_lp54 | 25392 | IG 1401 | <b>0.975</b> ± 0.6092 0.876772 | <b>1.291</b> ± 0.9594 0.05429 | <b>1.123</b> ± 0.8114 0.53526 | <b>1.427</b> ± 1.2248 0.23418 | TTAAACAATATTGATATTCAAAATGTAATATTAATAATTTAAATTTGATT   |
| plasmid_lp54 | 25431 | IG 1402 | <b>0.769</b> ± 0.4205 0.594406 | <b>1.072</b> ± 0.6536 0.8624  | <b>0.89</b> ± 0.5644 0.83727  | <b>1.379</b> ± 0.8219 0.06609 | GTTTTTGATATAATAATGTATAATGATATTTAAAAAATGATTAAACGAATT  |
| plasmid_lp54 | 25596 | BB_A38  | <b>1.064</b> ± 0.6474 0.777426 | <b>0.733</b> ± 0.5315 0.64086 | <b>0.359</b> ± 0.1875 0.15004 | <b>0.856</b> ± 0.7759 0.73525 | AATTAATTTAAGCCTGCTTGAAGGCTTGTGTTGAAAGAAAGCAGCAAGTC   |
| plasmid_lp54 | 26380 | BB_A38  | <b>1.753</b> ± 1.5157 0.473373 | <b>1.29</b> ± 0.914 0.54632   | <b>0.455</b> ± 0.5209 0.39479 | <b>1.604</b> ± 1.1209 0.35557 | GAGCCTTAAACAGAAAGCTTTAATGAGCAAGTCAAAAGGCTTGGCAGCAGC  |
| plasmid_lp54 | 26832 | BB_A39  | <b>0.442</b> ± 0.487 0.221985  | <b>1.09</b> ± 0.4493 0.72949  | <b>0.36</b> ± 0.1279 0.00413  | <b>0.309</b> ± 0.1233 0.02481 | GCAAGTAATAACTTAAGTCTAATTTCTCACAACTGACTTAAGAGAATCT    |
| plasmid_lp54 | 26934 | BB_A39  | <b>0.565</b> ± 0.1972 0.168609 | <b>1.047</b> ± 0.9501 0.90791 | <b>0.764</b> ± 0.407 0.03438  | <b>0.926</b> ± 0.3278 0.38889 | GAAAATCTTTAGCAAAAGGGTATCTTTAAAGAGGTTGTAAGGACAA       |
| plasmid_lp54 | 27125 | BB_A39  | <b>0.600</b> ± 0.2539 0.082494 | <b>1.282</b> ± 0.7802 0.25828 | <b>0.751</b> ± 0.2965 0.17122 | <b>1.035</b> ± 0.3888 0.81293 | TTACGAAAATTCATACAAAGTCATAAATTTTCAAAGAATAAAATCAGATCA  |
| plasmid_lp54 | 27359 | IG 1403 | <b>0.793</b> ± 0.3773 0.200671 | <b>1.114</b> ± 0.4707 0.34288 | <b>0.745</b> ± 0.3649 0.23959 | <b>1.157</b> ± 0.5091 0.34215 | CAAAAAATTAATTTAAAAAGGAGATTATTAATGAGCGATTCAATTGATT    |
| plasmid_lp54 | 27741 | BB_A40  | <b>0.212</b> ± 0.2867 0.275087 | <b>1.38</b> ± 1.3605 0.6676   | <b>0.579</b> ± 0.5496 0.50419 | <b>1.103</b> ± 1.3471 0.92892 | AGTCTACACAAACCCCATAAAGATCACTACCACCCGCTTTTGGTATTGCA   |
| plasmid_lp54 | 28205 | BB_A41  | <b>0.603</b> ± 0.1728 0.051208 | <b>1.163</b> ± 0.6412 0.51856 | <b>0.704</b> ± 0.1904 0.06357 | <b>1.022</b> ± 0.301 0.886    | TAATGATTTTAACACAGCTCAACAATAAAGTTCCAAAGACAAATAGTAAA   |
| plasmid_lp54 | 28231 | BB_A41  | <b>0.801</b> ± 0.8384 0.726001 | <b>1.87</b> ± 2.5383 0.2424   | <b>0.986</b> ± 1.2417 0.94254 | <b>1.136</b> ± 1.3533 0.49992 | TAAAGTTCCAAAGACAAAATAGTAAAAATTAACTATTTACCTTTTCAGTATG |
| plasmid_lp54 | 28472 | BB_A41  | <b>0.749</b> ± 0.1297 0.162604 | <b>1.263</b> ± 0.2193 0.14843 | <b>0.733</b> ± 0.1213 0.14009 | <b>1.127</b> ± 0.1692 0.273   | TATGTACGGACTTTTGAATCTTCAAATCAAATAGATAAAAACAGTTAAACA  |
| plasmid_lp54 | 29003 | BB_A42  | <b>0.120</b> ± 0.1545 0.012493 | <b>0.815</b> ± 0.8047 0.78543 | <b>0.48</b> ± 0.7271 0.38831  | <b>0</b> ± 0 0.03274          | ATTCACACTTTAGAGTTTTTAAATTTGCACTTAAAGCCTGATTGGTATC    |
| plasmid_lp54 | 29006 | BB_A42  | <b>0.432</b> ± 0.2224 0.111352 | <b>0.274</b> ± 0.2688 0.19808 | <b>1.624</b> ± 1.1564 0.41253 | <b>0.851</b> ± 0.9686 0.63081 | AGAATCACTGCAAGAGTGTATGAGCAAATACTTAAAGCTTTAATGCTTGA   |
| plasmid_lp54 | 29368 | BB_A42  | <b>1.009</b> ± 0.7153 0.969507 | <b>1.417</b> ± 1.0841 0.55021 | <b>0.97</b> ± 0.5747 0.85369  | <b>1.047</b> ± 0.7461 0.91612 | AGAGAGCCTTTTGTCTTAAATCTTTTAAATCATCAAAGCATTGCAA       |
| plasmid_lp54 | 29485 | BB_A43  | <b>0.636</b> ± 0.3443 0.117592 | <b>1.04</b> ± 0.4411 0.90372  | <b>0.881</b> ± 0.5317 0.56929 | <b>0.644</b> ± 0.285 0.02891  | TATTGGATCTTTGATTACTCTGAATTTACAGAAAAAAGTTCTTGTGAATA   |
| plasmid_lp54 | 29749 | BB_A43  | <b>1.272</b> ± 1.3659 0.736115 | <b>2.156</b> ± 1.3689 0.2481  | <b>1.717</b> ± 1.1569 0.36324 | <b>2.762</b> ± 0.5833 0.02626 | CTCTTTGAGTGTAAGATTAAATTTAAAGACATTTCTTTAATGCAGAA      |
| plasmid_lp54 | 30034 | BB_A44  | <b>1.043</b> ± 0.4694 0.876589 | <b>1.239</b> ± 1.0236 0.7006  | <b>0.853</b> ± 0.2054 0.38705 | <b>1.236</b> ± 0.2306 0.01303 | TGGCCTTAAAGACTTTTTTGGACTTAGATCTTTTGCATGATAAGTGAAT    |
| plasmid_lp54 | 30440 | BB_A45  | <b>1.033</b> ± 0.4046 0.732187 | <b>1.604</b> ± 1.1257 0.34168 | <b>0.878</b> ± 0.2165 0.26343 | <b>0.993</b> ± 0.25 0.95752   | TCGTGTAATAAATCCAAAAGTGTTCATACACTTTGCAATGTTCTCATAA    |
| plasmid_lp54 | 30766 | BB_A46  | <b>0.837</b> ± 0.6332 0.522172 | <b>1.384</b> ± 1.3723 0.2888  | <b>0.627</b> ± 0.4561 0.3263  | <b>0.686</b> ± 0.6298 0.30178 | ATTATTGAAAGCTAGTCTGTTTTGCACAAAACACTACGCTTATTGTATCTTT |
| plasmid_lp54 | 31716 | BB_A46  | <b>1.008</b> ± 0.6989 0.980898 | <b>1.16</b> ± 1.216 0.87708   | <b>0.947</b> ± 0.6395 0.90434 | <b>1.038</b> ± 0.9699 0.9468  | TTAATAGCGTTAATTAATAATAACAACAAGAGATAAACGAATATTTAA     |
| plasmid_lp54 | 31727 | BB_A46  | <b>0.605</b> ± 0.3619 0.144079 | <b>1.475</b> ± 1.0066 0.06656 | <b>0.75</b> ± 0.4478 0.20281  | <b>0.881</b> ± 0.518 0.40379  | AATTTAATAATAACAACAAGAGATAAACGAATTTAAAGGAGAGCATCA     |
| plasmid_lp54 | 32244 | IG 1404 | <b>0.332</b> ± 0.1861 0.07518  | <b>1.187</b> ± 0.7595 0.58047 | <b>0.881</b> ± 0.4728 0.76869 | <b>1.176</b> ± 0.5212 0.29946 | AAGGATAAGAATTAATAATGAGATACAAGTTAAAAATATTAAACGAGGCCA  |
| plasmid_lp54 | 32861 | BB_A49  | <b>0.580</b> ± 0.3041 0.157957 | <b>1.171</b> ± 0.5747 0.27102 | <b>0.937</b> ± 0.2798 0.73619 | <b>0.908</b> ± 0.3405 0.4851  | AATGGGCTACAAGGAGCTTGTAGAGGTTAACCGAGTAGCCAATTTAAAGCT  |
| plasmid_lp54 | 32907 | BB_A49  | <b>0.583</b> ± 0.3954 0.316945 | <b>0.88</b> ± 0.7911 0.8702   | <b>0.216</b> ± 0.2322 0.08879 | <b>1.066</b> ± 0.7022 0.90502 | TTAAATTTGGCTACTCGGTTAACCTTACAAGCTCTTGTAGCCCATTTTTT   |
| plasmid_lp54 | 34337 | BB_A50  | <b>0.843</b> ± 0.3932 0.360746 | <b>1.569</b> ± 1.3505 0.3454  | <b>0.77</b> ± 0.4454 0.07172  | <b>1.028</b> ± 0.621 0.55875  | CTCTTGAATTTAATCACTAGCGCTATTTAGCAAATTTGTATGCTGCTCAA   |
| plasmid_lp54 | 36174 | BB_A53  | <b>0.704</b> ± 0.2163 0.237602 | <b>0.978</b> ± 0.6456 0.96864 | <b>0.5</b> ± 0.3006 0.0628    | <b>0.674</b> ± 0.3631 0.41293 | ATGCTATGCTCAATGTTTTAAAAATTTCTCAGGCTTATTTTTAATAACA    |
| plasmid_lp54 | 36853 | BB_A55  | <b>0.668</b> ± 1.0487 0.684229 | <b>1.623</b> ± 1.7244 0.50734 | <b>0.747</b> ± 1.1866 0.81076 | <b>2.773</b> ± 3.3752 0.07498 | AAAACCTGCAGACATTGTAATAAATTTATTATAAAAAGTTTTAGATCAGCAA |
| plasmid_lp54 | 37748 | BB_A56  | <b>0.684</b> ± 0.1442 0.00251  | <b>1.507</b> ± 0.8846 0.38978 | <b>0.595</b> ± 0.4468 0.32571 | <b>0.94</b> ± 0.2508 0.75664  | CAAAATTAAGATTAGATATACTACAAGTACTAATCTCAACCCCTTGTACT   |
| plasmid_lp54 | 37786 | BB_A56  | <b>0.991</b> ± 1.2673 0.97752  | <b>1.341</b> ± 2.0673 0.57799 | <b>0.765</b> ± 0.9329 0.28345 | <b>1.126</b> ± 1.0851 0.73279 | TAATTTTAATATTTTCCAAGAAAGTGATAATAATCATTTTGATAAAAAATTA |
| plasmid_lp54 | 37997 | BB_A56  | <b>1.095</b> ± 0.9417 0.902541 | <b>2.677</b> ± 3.6538 0.5294  | <b>0.749</b> ± 0.8365 0.71008 | <b>1.699</b> ± 1.5725 0.44428 | AAGATTAATGGAAGCTAAGTTTTGAAAATCATATGCACAGTTCTGGACTCTA |
| plasmid_lp54 | 38387 | BB_A57  | <b>0.343</b> ± 0.4792 0.331215 | <b>1.188</b> ± 1.5541 0.8626  | <b>0.688</b> ± 0.8548 0.56456 | <b>1.027</b> ± 1.2081 0.97194 | AGTTTACCCAAACCCAAAATTTTACAACAAATTGACAGCTCAAGAATATA   |
| plasmid_lp54 | 38506 | BB_A57  | <b>0.721</b> ± 0.4524 0.453609 | <b>1.257</b> ± 0.9923 0.66521 | <b>0.681</b> ± 0.4373 0.37024 | <b>1.219</b> ± 0.8441 0.52054 | AAGCTCACTTTTGTAGCTCTCGAGCAATCTGTTTTTATTATTTCTAT      |
| plasmid_lp54 | 38515 | BB_A57  | <b>0.723</b> ± 0.4201 0.18016  | <b>1.61</b> ± 1.0944 0.30051  | <b>0.702</b> ± 0.4299 0.25672 | <b>0.866</b> ± 0.6267 0.64514 | TTTGTTAGCTCTCGAGCAATCTGTTTTTATTATTTCTATGTTCTCGGT     |
| plasmid_lp54 | 39016 | BB_A57  | <b>0.826</b> ± 0.5941 0.37302  | <b>1.784</b> ± 1.948 0.46121  | <b>0.913</b> ± 0.5994 0.49814 | <b>0.86</b> ± 0.5458 0.37136  | AGAAGCTCCAATTAACAATAATTTTTCTGTATTTTGCATTTCTTCTTC     |
| plasmid_lp54 | 39628 | IG 1405 | <b>1.252</b> ± 0.9088 0.503813 | <b>3.844</b> ± 4.714 0.41094  | <b>2.372</b> ± 2.1328 0.30387 | <b>1.261</b> ± 0.6306 0.58867 | TAGTGGTGCTGTTTTTAAATTTTCTAAATTTTCTAAAACCTTGAAGACCA   |
| plasmid_lp54 | 40011 | BB_A59  | <b>0.720</b> ± 0.1509 0.141831 | <b>0.605</b> ± 0.5465 0.34147 | <b>1.132</b> ± 0.426 0.40671  | <b>0.923</b> ± 0.2089 0.65906 | GTGCACATTGTTAAGAATAGAATCTATTAATAATCCACGACCAATTGCACT  |
| plasmid_lp54 | 40458 | BB_A60  | <b>0.763</b> ± 0.2919 0.309524 | <b>0.735</b> ± 0.2656 0.28566 | <b>0.602</b> ± 0.228 0.23762  | <b>0.888</b> ± 0.4193 0.69194 | AAGGCTTTTTAAATAATAATCTTTGGGTTTTTGGATGTCGTTGGGGGATT   |
| plasmid_lp54 | 41013 | BB_A60  | <b>0.916</b> ± 0.2543 0.180413 | <b>1.729</b> ± 1.5023 0.42009 | <b>0.864</b> ± 0.2729 0.62067 | <b>1.06</b> ± 0.2971 0.41411  | AATTTGATCTTGTCTGTGATTATCTATAAATAAAGAACAAAAACCAA      |
| plasmid_lp54 | 41873 | BB_A61  | <b>0.744</b> ± 0.1709 0.051399 | <b>1.217</b> ± 0.2403 0.16095 | <b>0.647</b> ± 0.3487 0.11198 | <b>0.914</b> ± 0.2048 0.26094 | GCCTAAATAGTTTGCTTCTGATTTTATTCAATGCTGCTTTGAATCTAT     |

|              |       |          |              |                                |                               |                               |                               |                                                      |
|--------------|-------|----------|--------------|--------------------------------|-------------------------------|-------------------------------|-------------------------------|------------------------------------------------------|
| plasmid_ip54 | 42705 | BB_A64   |              | <b>0.942</b> ± 1.2551 0.847531 | <b>1.983</b> ± 3.5177 0.41781 | <b>1.017</b> ± 1.4052 0.96297 | <b>1.418</b> ± 1.6569 0.39946 | TGAATTTTTGATCTTAAGGTGTCATTTAATTTTGAAACGTCAGTTTGTAA   |
| plasmid_ip54 | 42710 | BB_A64   |              | <b>0.916</b> ± 0.4578 0.797449 | <b>1.443</b> ± 0.843 0.19475  | <b>0.871</b> ± 0.3066 0.52051 | <b>1.279</b> ± 0.7432 0.3148  | TTTTTGATCTTAAGGTGTCATTTAATTTTGAAACGTCAGTTTGTAAAGTCAG |
| plasmid_ip54 | 43314 | BB_A64   |              | <b>0.680</b> ± 0.81 0.688974   | <b>1.364</b> ± 1.479 0.70224  | <b>0.693</b> ± 0.7537 0.4924  | <b>1.173</b> ± 1.3139 0.14626 | TGAAGCCTTTGAAATTTGCTTTATTTTTCCAGCTGCGCCCTTTGTGGATT   |
| plasmid_ip54 | 43703 | BB_A65   |              | <b>0.875</b> ± 0.3457 0.712328 | <b>1.669</b> ± 0.9671 0.40573 | <b>0.682</b> ± 0.2333 0.25958 | <b>0.991</b> ± 0.3911 0.75114 | TAAATTTAATAATAATTAATAAAATAAGCACTGACCGAAAGAGCGCAT     |
| plasmid_ip54 | 43747 | BB_A65   |              | <b>1.143</b> ± 0.809 0.679674  | <b>2.048</b> ± 2.2556 0.25064 | <b>0.993</b> ± 0.6878 0.98827 | <b>1.048</b> ± 0.9584 0.70492 | AAAGAGAAATCATAGTATCTTTATATGTTTGCTCAATGTGGCTGTTAGCT   |
| plasmid_ip54 | 43881 | BB_A65   |              | <b>0.970</b> ± 0.466 0.912785  | <b>1.216</b> ± 0.8406 0.67375 | <b>1.153</b> ± 0.6768 0.77751 | <b>1.017</b> ± 0.6249 0.95371 | TAATAAAAAAAGAATGGCTTAGCACAAATAGAACACTAATAAAAGCTCAA   |
| plasmid_ip54 | 43967 | BB_A65   |              | <b>0.626</b> ± 0.3074 0.220709 | <b>1.191</b> ± 0.7042 0.15678 | <b>0.753</b> ± 0.3992 0.39056 | <b>1.069</b> ± 0.5205 0.75635 | AGCAATCAACATGGATAAGCTAAAAGCAAAATGATTTTAAACAAAAACTTT  |
| plasmid_ip54 | 44265 | BB_A65   |              | <b>0.922</b> ± 0.5162 0.807915 | <b>1.516</b> ± 1.0536 0.20324 | <b>0.689</b> ± 0.3981 0.11083 | <b>0.895</b> ± 0.389 0.77325  | TGAAGTTTTCTTTTTTATTATTGTCATTTCTTGCTAAAATTTCAAAG      |
| plasmid_ip54 | 44445 | BB_A65   |              | <b>1.124</b> ± 0.6768 0.522302 | <b>1.499</b> ± 0.8157 0.08435 | <b>1.165</b> ± 0.8867 0.68881 | <b>1.306</b> ± 0.6774 0.24096 | TTGCTTTGTTGCTCTTTGTTTATAGATCGAAGAGAAAAATGCTGTTATC    |
| plasmid_ip54 | 44656 | IG 1406  |              | <b>0.549</b> ± 0.5212 0.034755 | <b>0.615</b> ± 0.574 0.01649  | <b>0.76</b> ± 0.4005 0.21516  | <b>1.078</b> ± 0.624 0.37738  | TTTGATTAATAGTTGCAAAATAGTTTATTTTCGTTTTTAAATAAACTAT    |
| plasmid_ip54 | 44658 | IG 1407  |              | <b>0.849</b> ± 0.657 0.25263   | <b>2.423</b> ± 3.0769 0.39217 | <b>0.877</b> ± 0.6414 0.30685 | <b>0.975</b> ± 0.7143 0.65785 | TGATTAATAGTTGCAAAATAGTTTATTTTCGTTTTTAAATAAACTATTT    |
| plasmid_ip54 | 45034 | BB_A66   |              | <b>0.721</b> ± 0.5914 0.357311 | <b>1.166</b> ± 0.8585 0.7547  | <b>0.696</b> ± 0.6316 0.51674 | <b>1.057</b> ± 0.948 0.93324  | CCTGATATCATTAATCTCTTAAAGCTGTGATTTTGATTCTCATTGTAA     |
| plasmid_ip54 | 45178 | BB_A66   |              | <b>0.598</b> ± 0.3232 0.377677 | <b>1.227</b> ± 1.2659 0.59619 | <b>0.886</b> ± 0.4982 0.71274 | <b>0.692</b> ± 0.3635 0.4747  | GTGTTAGAGTTAAGCTGTGGCGCTAACCCTGTCATAAACTTTAGCACTT    |
| plasmid_ip54 | 45450 | BB_A66   |              | <b>0.428</b> ± 0.5238 0.006349 | <b>2.951</b> ± 4.6834 0.49295 | <b>0.506</b> ± 0.5821 0.01978 | <b>1.068</b> ± 1.3238 0.89243 | GGCAAAATGTTGCGAGCCCGCTATTTCTGCTGTTAAAAGTCTTGATTTCC   |
| plasmid_ip54 | 46177 | IG 1408  |              | <b>0.408</b> ± 0.4255 0.390767 | <b>0.641</b> ± 0.6468 0.63152 | <b>0.738</b> ± 0.5727 0.54799 | <b>1.097</b> ± 0.6602 0.82476 | AAATGAACACAAAAGTAACGTTTTTCCAGTTTAGTAAACGCCAAATTTGTA  |
| plasmid_ip54 | 46666 | BB_A68   | <i>cspA</i>  | <b>0.913</b> ± 0.474 0.762438  | <b>1.185</b> ± 0.5472 0.61764 | <b>0.741</b> ± 0.23 0.11964   | <b>1.026</b> ± 0.2283 0.90048 | TAAGTCAAGAAGAATCTAATCATTGCTAATGCAAAATAAATCCAACCTAG   |
| plasmid_ip54 | 47220 | BB_A68   | <i>cspA</i>  | <b>1.426</b> ± 0.9786 0.275908 | <b>1.23</b> ± 0.8483 0.65279  | <b>0.415</b> ± 0.4379 0.16008 | <b>1.072</b> ± 1.0387 0.89539 | AGCCAACTAAATATAATCAAGATTAATATTATTGCAATGATATTAACCTT   |
| plasmid_ip54 | 47226 | BB_A68   | <i>cspA</i>  | <b>0.992</b> ± 0.4499 0.986325 | <b>1.444</b> ± 0.6902 0.41121 | <b>0.719</b> ± 0.3943 0.46334 | <b>0.918</b> ± 0.4556 0.8471  | GAAAAAGCCAACTAAATATAATCAAGATTAATATTATTGCAATGATAT     |
| plasmid_ip54 | 47229 | IG 1409  |              | <b>0.653</b> ± 0.6547 0.471801 | <b>0.955</b> ± 0.975 0.90438  | <b>0.654</b> ± 0.6058 0.3429  | <b>0.823</b> ± 0.6362 0.75396 | AATACTCTCTTATAAATTAATAACTAATATTAATTAATCTAATATAAAAT   |
| plasmid_ip54 | 48263 | BB_A69   |              | <b>1.404</b> ± 0.4007 0.254683 | <b>2.061</b> ± 1.0934 0.21754 | <b>1.28</b> ± 0.7342 0.58541  | <b>0.844</b> ± 0.3577 0.63701 | TTCAAAATACTCTCCTTATAAATTAATAAACAGTATAAATTAATTTTAAATA |
| plasmid_ip54 | 48305 | IG 1410  |              | <b>0.451</b> ± 0.6895 0.18355  | <b>2.115</b> ± 2.4973 0.17549 | <b>0.781</b> ± 0.8892 0.58678 | <b>0.818</b> ± 1.0828 0.42247 | TTTTTAATATAAAAATAATTTATAATTTATATAAAAAATTTGCAAAATAAT  |
| plasmid_ip54 | 48639 | BB_A70   |              | <b>0.761</b> ± 0.3765 0.37903  | <b>1.868</b> ± 1.5166 0.42883 | <b>0.832</b> ± 0.2745 0.41724 | <b>0.919</b> ± 0.3382 0.72418 | ACAGTTTTTTTCAAAGCTTTTTTGAACCTTTCTTTTAGTAAATGATCAAT   |
| plasmid_ip54 | 48752 | BB_A70   |              | <b>3.184</b> ± 3.2875 0.092848 | <b>1.445</b> ± 2.6166 0.68695 | <b>3.596</b> ± 3.4932 0.07827 | <b>4.109</b> ± 5.4459 0.27744 | AAAAGAAGATAATTTAAACACTCTAAGCGAAGAAAATTTAAAAGAAGTACT  |
| plasmid_ip54 | 49049 | BB_A70   |              | <b>0.346</b> ± 0.1786 0.157782 | <b>0.519</b> ± 0.4827 0.42329 | <b>0.885</b> ± 0.3998 0.45971 | <b>0.909</b> ± 0.4709 0.48254 | AATGAAAAAATACTGCGGAAAAAGAACTGTGATCTTAGAAACTCTTGA     |
| plasmid_ip54 | 49454 | BB_A71   |              | <b>0.935</b> ± 0.4012 0.773401 | <b>1.103</b> ± 0.256 0.07038  | <b>0.789</b> ± 0.2411 0.35373 | <b>0.76</b> ± 0.245 0.37338   | AAAACATAATAAACCAATAATATAAGCAACAAACAAATGTTGCACTTGATA  |
| plasmid_ip54 | 50033 | BB_A0078 |              | <b>0.530</b> ± 0.5961 0.228728 | <b>1.425</b> ± 0.9799 0.33834 | <b>0.716</b> ± 0.4648 0.03551 | <b>0.951</b> ± 0.9482 0.91984 | TAAAGTTAGTATTGTTGCAATGATATTTAGTTTATTTTTGTCAAACGAT    |
| plasmid_ip54 | 50326 | BB_A73   |              | <b>1.052</b> ± 0.6248 0.885427 | <b>0.808</b> ± 0.6454 0.62142 | <b>0.772</b> ± 0.4799 0.66441 | <b>0.743</b> ± 0.3894 0.34761 | AAACACCGCTAAAAACCTGTTGTGACCACATCACTAATTTGGTGGTGT     |
| plasmid_ip54 | 50654 | BB_A73   |              | <b>0.818</b> ± 0.7944 0.512352 | <b>1.397</b> ± 1.4388 0.5601  | <b>0.38</b> ± 0.419 0.2534    | <b>0.698</b> ± 0.7118 0.66785 | CATTACACACTTATTGGTTAATTTTTGGACAGGATTTAAAATCCAAGAA    |
| plasmid_ip54 | 50991 | BB_A73   |              | <b>0.976</b> ± 0.5694 0.861827 | <b>1.047</b> ± 0.7221 0.28573 | <b>0.888</b> ± 0.4965 0.78574 | <b>0.94</b> ± 0.5315 0.72026  | TTGAAAGATTTGGGTGCTTACAATCTTTCTGTTTTTTGAAAACTTTAAT    |
| plasmid_ip54 | 51432 | IG 1411  |              | <b>0.915</b> ± 0.8488 0.818602 | <b>1.384</b> ± 1.2071 0.4818  | <b>0.925</b> ± 0.6109 0.43564 | <b>1.088</b> ± 0.585 0.70791  | TTAAATTAATACACCTTAGCAAACATTGCCATTAAGATCAATACTAATTA   |
| plasmid_ip54 | 51592 | IG 1412  |              | <b>0.895</b> ± 0.6792 0.07652  | <b>1.785</b> ± 1.7981 0.34424 | <b>0.8</b> ± 0.5024 0.20139   | <b>1.092</b> ± 0.8063 0.38411 | GGTCATTTAATTAATAAAAGTTAATTAATATATTTTTTAAATTAATGTAT   |
| plasmid_ip54 | 51605 | IG 1413  |              | <b>1.260</b> ± 1.5497 0.647163 | <b>2.451</b> ± 3.0084 0.36624 | <b>0.926</b> ± 1.1417 0.81871 | <b>1.126</b> ± 1.194 0.69332  | AATTAAGAATGACCTTAAAAATAAAGGGTTTTAATAAAGATTAACACTTA   |
| plasmid_ip54 | 51658 | IG 1414  |              | <b>1.152</b> ± 1.683 0.908702  | <b>0.545</b> ± 0.725 0.51854  | <b>0.942</b> ± 1.1086 0.95526 | <b>0.542</b> ± 0.6901 0.56157 | AACTAAATAGAATCAATACATATTTAAATAAAAAATATAAATTAACCTTT   |
| plasmid_ip54 | 51666 | IG 1415  |              | <b>1.561</b> ± 0.296 0.034661  | <b>1.878</b> ± 0.8462 0.19956 | <b>1.17</b> ± 0.2752 0.25518  | <b>1.102</b> ± 0.7223 0.84886 | TAAACATAACTAAATTAGAATCAATACATATTTAAATAAAAAATATAAAT   |
| plasmid_ip54 | 51681 | IG 1416  |              | <b>0.471</b> ± 0.3047 0.109069 | <b>2.287</b> ± 2.9225 0.45262 | <b>0.439</b> ± 0.2897 0.23296 | <b>0.57</b> ± 0.5068 0.50454  | AATGTTTAAATAAGGAGAATTAACAATGACTAAAATATTTAGTAAATTAAT  |
| plasmid_ip54 | 51718 | BB_A74   | <i>osm28</i> | <b>1.732</b> ± 0.6879 0.069968 | <b>1.354</b> ± 0.8632 0.29125 | <b>0.9</b> ± 0.3963 0.53247   | <b>1.141</b> ± 0.5551 0.32832 | ATATTTTAGTCATTGTTAATTTCTCCTATTTTAAACATTTATTTTTATTATT |
| plasmid_ip54 | 51721 | BB_A74   | <i>osm28</i> | <b>1.404</b> ± 0.4221 0.245803 | <b>1.719</b> ± 1.0843 0.3709  | <b>0.906</b> ± 0.1309 0.33186 | <b>1.076</b> ± 0.1713 0.54317 | AGTAATTTAATAATTAATGATTATTGTTGGATTGTAAGTTTAAATGTG     |
| plasmid_ip54 | 51856 | BB_A74   | <i>osm28</i> | <b>1.034</b> ± 0.4677 0.836554 | <b>2.413</b> ± 2.3998 0.30772 | <b>0.51</b> ± 0.4192 0.01645  | <b>0.963</b> ± 0.9145 0.90108 | GATCAAAAAGATCAGGTTAATCAAGCTTTAGATACTATTAACAAGGTAACC  |
| plasmid_ip54 | 51918 | BB_A74   | <i>osm28</i> | <b>1.162</b> ± 0.7559 0.225214 | <b>2.468</b> ± 3.0105 0.40312 | <b>0.762</b> ± 0.9973 0.51684 | <b>1.018</b> ± 1.2162 0.97071 | TAGTAAATTAGAGGGAGTTAGAGAATCATCTCTTGAATGGTAGAATCAAA   |
| plasmid_ip54 | 51994 | BB_A74   | <i>osm28</i> | <b>1.295</b> ± 1.0295 0.582535 | <b>0.995</b> ± 0.7914 0.89897 | <b>0.834</b> ± 1.0195 0.83903 | <b>1.294</b> ± 1.1246 0.73034 | CAACCTTTTAACTACTCTGATCATCATTTGATCTACCAATCAAGAGATG    |
| plasmid_ip54 | 52128 | BB_A74   | <i>osm28</i> | <b>0.581</b> ± 0.3296 0.054032 | <b>1.552</b> ± 1.928 0.63459  | <b>0.567</b> ± 0.1896 0.00261 | <b>0.621</b> ± 0.4228 0.10692 | AGCCTTTTAGACATTTCAACAACCTTGTGTCACCTCAGCAACCATCC      |
| plasmid_ip54 | 52131 | BB_A74   | <i>osm28</i> | <b>0.936</b> ± 0.399 0.091759  | <b>1.798</b> ± 1.4637 0.33846 | <b>0.817</b> ± 0.3349 0.01097 | <b>1.089</b> ± 0.5072 0.38281 | TCAAGAAACCCAAAAGCTGTTTCTGTTGCTGGTGAAGCAACATTTTAAAT   |
| plasmid_ip54 | 52138 | BB_A74   | <i>osm28</i> | <b>1.435</b> ± 0.2052 0.024005 | <b>1.353</b> ± 0.1842 0.03655 | <b>0.855</b> ± 0.0823 0.0998  | <b>1.107</b> ± 0.1973 0.2192  | TTTCTTGAACGCTTTTAGACATTTCAACAACCTTGTGTCACCTCAG       |
| plasmid_ip54 | 52314 | BB_A74   | <i>osm28</i> | <b>1.284</b> ± 0.8403 0.612862 | <b>1.359</b> ± 1.1734 0.7085  | <b>1.034</b> ± 0.6789 0.95432 | <b>1.433</b> ± 0.6671 0.34472 | AGAGGCTAAAAAGTTCTCAATATGGTTAATGGTTTGAATCCGTCAAATAA   |
| plasmid_ip54 | 52403 | BB_A74   | <i>osm28</i> | <b>1.711</b> ± 0.1277 0.010185 | <b>1.984</b> ± 0.656 0.12973  | <b>1.013</b> ± 0.0508 0.72147 | <b>1.239</b> ± 0.0862 0.00919 | ATAGCCTTTGCAACATCTTTTTTGTGCTAATCTTGTATCTTATTTGACGGA  |
| plasmid_ip54 | 52432 | BB_A74   | <i>osm28</i> | <b>1.225</b> ± 0.5187 0.363485 | <b>1.173</b> ± 0.5427 0.53882 | <b>0.731</b> ± 0.2054 0.02076 | <b>0.943</b> ± 0.5035 0.79014 | CGCCTTGAGCTACCTTAAACAACATTAGAAAATAGCCTTTGCAACATCTTTT |
| plasmid_ip54 | 52477 | BB_A74   | <i>osm28</i> | <b>1.063</b> ± 1.2639 0.911509 | <b>1.223</b> ± 1.8476 0.8239  | <b>0.56</b> ± 0.5921 0.13521  | <b>0.648</b> ± 0.482 0.48395  | TAGTTAGATATAAATTTATAAATAATAGAGGTTAAAGCAAAAAGGTTT     |
| plasmid_ip54 | 53442 | BB_A76   | <i>thyX</i>  | <b>1.163</b> ± 1.1269 0.349503 | <b>0.303</b> ± 0.3816 0.36429 | <b>0.041</b> ± 0.0781 0.14939 | <b>0.186</b> ± 0.2245 0.27521 | TTTAAATCCAAAGCATTAATAATGCAATATCTCTCGTGGGAAAATCTC     |
| plasmid_ip56 | 202   | IG 1417  |              | <b>2.167</b> ± 1.9715 0.058637 | <b>3.391</b> ± 3.6107 0.18191 | <b>0.482</b> ± 0.3911 0.36447 | <b>1.667</b> ± 1.4398 0.4733  | GTTTACTGAGATTTAATAACTTTAATTGAGGATGTTTTATTTAAAAA      |

|              |       |         |                                |                               |                               |                               |                                                       |
|--------------|-------|---------|--------------------------------|-------------------------------|-------------------------------|-------------------------------|-------------------------------------------------------|
| plasmid_lp56 | 292   | BB_Q01  | <b>1.223</b> ± 1.431 0.655557  | <b>2.668</b> ± 2.3538 0.16432 | <b>1.257</b> ± 2.1747 0.80971 | <b>0.852</b> ± 0.5976 0.78625 | TTGCTATTCTGTGGCAAGATTTAAAAAAGATGCTGAGATTTGTATTCTT     |
| plasmid_lp56 | 371   | BB_Q01  | <b>0.594</b> ± 0.144 0.078488  | <b>1.221</b> ± 0.8381 0.7217  | <b>0.363</b> ± 0.3385 0.01094 | <b>0.428</b> ± 0.5045 0.26307 | GTTTTCGGTTTTTTTTCTGACTCCGCAAGAAATACAAATCTCAGCATC      |
| plasmid_lp56 | 420   | BB_Q01  | <b>1.604</b> ± 1.4146 0.564604 | <b>1.043</b> ± 1.0673 0.95644 | <b>0.406</b> ± 0.1885 0.0235  | <b>0.531</b> ± 0.3813 0.15803 | GGAGTTCACAGATTTTATGTAGGTAATAAGAACTGGTCT               |
| plasmid_lp56 | 901   | BB_Q03  | <b>0.767</b> ± 0.7114 0.603393 | <b>1.205</b> ± 1.2686 0.37823 | <b>0.582</b> ± 0.5223 0.43966 | <b>0.671</b> ± 0.6528 0.60239 | TTGGGTTGTTATTTGCCTGATAATCAGGAACAAGCTGTTCAAACTTTTTTT   |
| plasmid_lp56 | 7211  | BB_Q12  | <b>1.700</b> ± 0.9607 0.051905 | <b>1.191</b> ± 1.2767 0.84553 | <b>2.071</b> ± 1.5902 0.38528 | <b>2.017</b> ± 1.462 0.37087  | AATAACCCTCAAATTTTGTAAATCGGAACAATAGTGCGTGTGTTGCTAA     |
| plasmid_lp56 | 7397  | BB_Q12  | <b>1.145</b> ± 0.2707 0.509624 | <b>0.787</b> ± 0.53 0.59433   | <b>1.464</b> ± 0.3258 0.0941  | <b>1.219</b> ± 0.6298 0.54959 | CAGCTTTATTTCCAAATACTGCTACTTTTATAATAAACATCGTTACTAA     |
| plasmid_lp56 | 7503  | BB_Q13  | <b>3.321</b> ± 2.6693 0.144823 | <b>1.416</b> ± 1.0581 0.25478 | <b>1.521</b> ± 0.794 0.35649  | <b>1.059</b> ± 0.5977 0.83594 | TAATGTATAAATGGTTTTCCGCTGATCAAATGAAGATGTTGATCTTCAGA    |
| plasmid_lp56 | 7675  | BB_Q13  | <b>4.451</b> ± 3.6105 0.03294  | <b>2.045</b> ± 2.0166 0.07995 | <b>1.296</b> ± 1.7709 0.61317 | <b>0.918</b> ± 0.8592 0.6604  | CTTAAATACAGTACAAATTTAGCGACTTAAAGCAGGCGCTGAAAAATT      |
| plasmid_lp56 | 7703  | BB_Q13  | <b>2.727</b> ± 0.4983 0.026227 | <b>1.265</b> ± 0.748 0.59838  | <b>0.867</b> ± 0.123 0.1556   | <b>1.061</b> ± 0.0999 0.28093 | AGTGCTTAAATTTGTAATGTAATTTAAGTAATTAGTCTTACCCTCAG       |
| plasmid_lp56 | 7815  | BB_Q13  | <b>1.980</b> ± 0.7038 0.008335 | <b>1.203</b> ± 0.4066 0.37109 | <b>1.026</b> ± 0.4755 0.79232 | <b>0.974</b> ± 0.4272 0.2918  | AACTTATAATCACTTTGTAACAGGCACTGTTCAATCAAAGAGATG         |
| plasmid_lp56 | 7900  | BB_Q13  | <b>0.473</b> ± 0.5723 0.451791 | <b>1.153</b> ± 1.1453 0.82015 | <b>0.409</b> ± 0.5731 0.11312 | <b>0.531</b> ± 0.5473 0.2467  | TGGACTTCTAATATGCCACATCAAGTAAAGAAAGAGTTGCTAGTGGTGA     |
| plasmid_lp56 | 8267  | BB_Q13  | <b>1.451</b> ± 1.8726 0.614781 | <b>1.287</b> ± 1.7054 0.69953 | <b>0.536</b> ± 0.5819 0.00093 | <b>0.901</b> ± 0.7275 0.07106 | CCTACACCAATGAACAAGTGGATAAAGATCAACTGATATGCTCATTCA      |
| plasmid_lp56 | 8638  | BB_Q14  | <b>0.853</b> ± 0.7168 0.635208 | <b>1.242</b> ± 1.6795 0.80329 | <b>0.882</b> ± 0.6831 0.63319 | <b>1.186</b> ± 0.9819 0.59579 | TGGGTTGCAATTAAGAAAACAGGGAGTTGTCGAAATTTGAATTTGATA      |
| plasmid_lp56 | 8737  | BB_Q14  | <b>0.482</b> ± 0.2991 0.234416 | <b>0.482</b> ± 0.431 0.33174  | <b>0.811</b> ± 0.4924 0.71508 | <b>0.736</b> ± 0.5661 0.66072 | GTAGCAGTGGAGGCGAAGAGGTGGCGAGGGGGTGTGGCTCAAACAAGA      |
| plasmid_lp56 | 8867  | BB_Q14  | <b>2.173</b> ± 1.4266 0.230066 | <b>1.413</b> ± 1.6839 0.692   | <b>0.405</b> ± 0.4373 0.17162 | <b>0.369</b> ± 0.5936 0.4333  | ATGAATGGTGTAGAAAAAGACTTCTGATATGTCATTTCCGATGATCAAC     |
| plasmid_lp56 | 9012  | BB_Q15  | <b>2.909</b> ± 2.2401 0.0423   | <b>0.845</b> ± 0.7001 0.57825 | <b>0.303</b> ± 0.3039 0.26565 | <b>1.156</b> ± 1.3503 0.76336 | AGTACACTGAATTCGAGGAGTATTATTGACATAAAGCCACAAGAACTTG     |
| plasmid_lp56 | 9036  | BB_Q15  | <b>1.709</b> ± 0.7542 0.055094 | <b>1.642</b> ± 1.6846 0.48446 | <b>0.79</b> ± 0.2871 0.24429  | <b>1.167</b> ± 0.6183 0.3819  | TTATTGACATAAAGCCACAAGAACTGCAATCTTTATGATTCTGATATGT     |
| plasmid_lp56 | 9103  | BB_Q15  | <b>0.496</b> ± 0.2434 0.101685 | <b>0.496</b> ± 0.4389 0.26388 | <b>1.147</b> ± 0.3211 0.183   | <b>1.19</b> ± 0.4123 0.27232  | TTCCAAACTTTACACATATCAAGACTTAACTATGAACTAAAAAGACCGAAT   |
| plasmid_lp56 | 9118  | BB_Q15  | <b>3.917</b> ± 2.3666 0.104991 | <b>0.773</b> ± 0.5246 0.46124 | <b>1.133</b> ± 0.5845 0.513   | <b>1.223</b> ± 0.7467 0.67411 | TGTTGAAAGTTGGAATATCCTTGAATATCAGACATATCAGAATCATAAAG    |
| plasmid_lp56 | 9387  | BB_Q16  | <b>2.000</b> ± 1.244 0.118951  | <b>0.771</b> ± 0.396 0.09602  | <b>0.782</b> ± 0.2948 0.37454 | <b>1.174</b> ± 0.5246 0.0358  | TATCAATAATAGCTATATAAATCTAAGTTAATCTTGACCTAAATAGGG      |
| plasmid_lp56 | 9551  | BB_Q16  | <b>2.738</b> ± 1.0962 0.066106 | <b>1.085</b> ± 0.6801 0.77752 | <b>1.62</b> ± 0.7268 0.21694  | <b>1.039</b> ± 0.3876 0.90392 | CTACCCCTTTAACTTACTTTTGATTGATTAGCCTTAAAGGCTGGAGTG      |
| plasmid_lp56 | 9609  | BB_Q16  | <b>1.949</b> ± 1.4952 0.302446 | <b>1.234</b> ± 1.4809 0.77564 | <b>0.58</b> ± 0.2748 0.21291  | <b>0.7</b> ± 0.2504 0.0068    | TAAGGTAACACTTGAATGATTTTCACTTTAGATATGGTATTAATCATTTTA   |
| plasmid_lp56 | 9777  | BB_Q17  | <b>2.009</b> ± 0.481 0.059984  | <b>1.041</b> ± 0.3561 0.89436 | <b>0.756</b> ± 0.2687 0.34134 | <b>0.898</b> ± 0.1805 0.48182 | TTATATTTGAGTAGCAGCTGTGATTTTTGAAAGATATGGATGATTGTAGG    |
| plasmid_lp56 | 9842  | BB_Q17  | <b>2.637</b> ± 0.9641 0.039344 | <b>1.998</b> ± 2.0076 0.43097 | <b>1.04</b> ± 0.3428 0.87578  | <b>1.311</b> ± 0.6044 0.44374 | TGAAAATGCTTTGGAATTTAGTATAAATTTTCAAATATATATTATTGCAAT   |
| plasmid_lp56 | 9891  | BB_Q17  | <b>1.142</b> ± 0.572 0.520142  | <b>1.337</b> ± 0.7806 0.20255 | <b>0.153</b> ± 0.2227 0.0129  | <b>0.298</b> ± 0.2282 0.10617 | TTGCAATAATATATATTTGAAAAATTTATACTAAATCCAAAGCAATTTTCAAT |
| plasmid_lp56 | 9943  | BB_Q17  | <b>1.974</b> ± 1.6579 0.24199  | <b>2.955</b> ± 2.1425 0.14325 | <b>0.744</b> ± 0.7596 0.63713 | <b>0.655</b> ± 0.7298 0.60662 | TAAAGCATTACATGCGTGAATAGCGTCAAAGCTTTGGCGTTAACACT       |
| plasmid_lp56 | 9966  | BB_Q17  | <b>0.752</b> ± 0.6604 0.342142 | <b>0.615</b> ± 0.5346 0.09435 | <b>0.882</b> ± 0.3295 0.17825 | <b>1.048</b> ± 0.4821 0.48599 | CACAATAAAGCTCATAAGTATAAATTTGCCAGTCAACCCGACTATTATT     |
| plasmid_lp56 | 10834 | BB_Q18  | <b>2.557</b> ± 1.2812 0.065748 | <b>2.118</b> ± 1.9798 0.34498 | <b>1.017</b> ± 0.4891 0.92427 | <b>1.012</b> ± 0.3089 0.95809 | ATTGAAAAGTTGCGAACTGCAAAAATCAACTTTTATTCACCTCTTAATGAA   |
| plasmid_lp56 | 11610 | BB_Q19  | <b>2.768</b> ± 0.9505 0.034985 | <b>1.679</b> ± 1.7351 0.53407 | <b>1.211</b> ± 0.5207 0.63745 | <b>1.089</b> ± 0.3274 0.24164 | GAAATAATTTTGGTAGCAATCTCATGTAATGCTAAATCAAGCAATTTTA     |
| plasmid_lp56 | 11688 | BB_Q19  | <b>1.888</b> ± 0.4406 0.067098 | <b>1.827</b> ± 1.5627 0.45085 | <b>0.96</b> ± 0.0967 0.46716  | <b>0.937</b> ± 0.1468 0.48545 | GCCCTAATTTCAAAGATACTTTTTCGGCCCTCAGCAGAATAACTTCTTGA    |
| plasmid_lp56 | 12044 | BB_Q20  | <b>3.306</b> ± 1.9999 0.159423 | <b>1.533</b> ± 0.4688 0.22645 | <b>1.83</b> ± 0.7298 0.13972  | <b>1.373</b> ± 0.4474 0.21176 | AAAAAGCCCGCTTATGATATTTGAGTGAGTATGAAAATAATGTTGGTGTAT   |
| plasmid_lp56 | 12215 | BB_Q21  | <b>1.813</b> ± 0.6208 0.012628 | <b>1.605</b> ± 1.2051 0.3071  | <b>1.28</b> ± 0.533 0.42393   | <b>1.104</b> ± 0.4231 0.33645 | TTGATAAAGCTATTGCAAGTCTTGATGAGACTAGAAAAAATATTTAACT     |
| plasmid_lp56 | 12434 | IG_1418 | <b>2.210</b> ± 0.7279 0.045712 | <b>1.183</b> ± 0.6067 0.6632  | <b>0.967</b> ± 0.2883 0.79436 | <b>1.013</b> ± 0.6804 0.98279 | AGTCTCACTTGTAAAATTAATTCATACAATCTTTTCTAATTTAATC        |
| plasmid_lp56 | 12437 | BB_Q22  | <b>2.270</b> ± 0.7949 0.056651 | <b>1.874</b> ± 0.864 0.19281  | <b>1.164</b> ± 0.3235 0.5306  | <b>1.136</b> ± 0.3073 0.431   | GTGAGCGACAAATTCACCATTAATTTAAAGGATCTTTGATTCATGCTGCA    |
| plasmid_lp56 | 12609 | BB_Q22  | <b>2.644</b> ± 2.1966 0.303629 | <b>2.173</b> ± 2.511 0.47441  | <b>0.403</b> ± 0.3902 0.20037 | <b>0.715</b> ± 0.352 0.44001  | AGTCTTTTTCTTGTCCGACAAATATTTTTACAATATCTTTAGTGCTA       |
| plasmid_lp56 | 13155 | BB_Q22  | <b>2.320</b> ± 0.9336 0.008687 | <b>1.284</b> ± 0.9356 0.42844 | <b>0.846</b> ± 0.377 0.54316  | <b>0.956</b> ± 0.4783 0.32739 | ATTTGAAAAACGCAAGTGAATTTGAGCTATGCTTAAATCCAGTGGTGTCTA   |
| plasmid_lp56 | 13236 | BB_Q22  | <b>2.464</b> ± 0.4755 0.021747 | <b>1.818</b> ± 1.2203 0.34388 | <b>1.24</b> ± 0.3148 0.27598  | <b>1.215</b> ± 0.1541 0.05622 | TTAACAGCCTTACTGCATCTTCGCTGCTCATAGCACCCTGGATTTAAGC     |
| plasmid_lp56 | 13515 | BB_Q22  | <b>2.573</b> ± 1.8562 0.006889 | <b>1.53</b> ± 1.4928 0.17422  | <b>1.056</b> ± 0.7383 0.91179 | <b>1.863</b> ± 1.3048 0.22841 | TCATTAACCTGGATCACCGCTAAATTTAAAAATTTTGATTTTACCAAAGATA  |
| plasmid_lp56 | 13749 | IG_1419 | <b>1.551</b> ± 1.2264 0.023659 | <b>1.753</b> ± 1.9668 0.33498 | <b>0.982</b> ± 0.7321 0.92863 | <b>1.008</b> ± 0.8736 0.73685 | ATTACCTTTTACAAAATTTAGGAGTGTGTTAGCATTGCTTTGATTCTCA     |
| plasmid_lp56 | 14140 | BB_Q23  | <b>1.393</b> ± 0.8617 0.321432 | <b>1.824</b> ± 1.2976 0.26606 | <b>0.594</b> ± 0.417 0.00786  | <b>0.711</b> ± 0.5175 0.13572 | TGTTACCAGTCAATCCGAGTTGAGTACTACATATTCGCTTTCTATCA       |
| plasmid_lp56 | 14488 | BB_Q24  | <b>1.768</b> ± 1.0236 0.021439 | <b>0.474</b> ± 0.3824 0.35576 | <b>0.996</b> ± 0.5396 0.97988 | <b>1.027</b> ± 0.572 0.77312  | TCTACATTGTAGAACTCAATTTTAAATCATATTGTAGTAACAGCAATTTT    |
| plasmid_lp56 | 14694 | BB_Q24  | <b>1.712</b> ± 0.7151 0.224613 | <b>1.325</b> ± 1.3221 0.74175 | <b>0.659</b> ± 0.3937 0.24639 | <b>1.11</b> ± 0.3911 0.68189  | AAAAATATTTAAGAAATTTGCTCATGAAAAAATTTTGATTTCAATATG      |
| plasmid_lp56 | 14702 | BB_Q24  | <b>2.396</b> ± 0.9155 0.053469 | <b>1.562</b> ± 0.8991 0.27181 | <b>1.007</b> ± 0.2909 0.95161 | <b>1.239</b> ± 0.4262 0.35243 | ATATATTTTACTATATCTCAAATTTAATGTCGTCGGTGAAGTCTAAGGG     |
| plasmid_lp56 | 15026 | BB_Q24  | <b>1.295</b> ± 0.5107 0.509374 | <b>0.504</b> ± 0.2427 0.00397 | <b>0.807</b> ± 0.1923 0.33322 | <b>0.961</b> ± 0.2415 0.86229 | TGTTCATACGTAATAGCCGATATTGGTACTGGTTTACGGGATATGAATG     |
| plasmid_lp56 | 15567 | BB_Q25  | <b>0.945</b> ± 0.9566 0.898699 | <b>0.587</b> ± 0.3669 0.36204 | <b>0.107</b> ± 0.103 0.0492   | <b>1.352</b> ± 1.273 0.59042  | CAATACCCGAATTTGAAGATTTAGAAATTCACACAAAAAATATCTCTAATA   |
| plasmid_lp56 | 15612 | BB_Q25  | <b>1.597</b> ± 0.5989 0.126441 | <b>1.684</b> ± 1.5304 0.5076  | <b>0.813</b> ± 0.3218 0.00602 | <b>1.473</b> ± 0.4608 0.00871 | GAGATATTTTTGTGTGAATTTCTAAATCTCAAATTCGGGTATTGTAACA     |
| plasmid_lp56 | 15725 | BB_Q25  | <b>3.997</b> ± 1.4303 0.017351 | <b>3.347</b> ± 3.2297 0.31522 | <b>2.283</b> ± 1.5825 0.32589 | <b>1.345</b> ± 0.7062 0.36706 | CTTAGTCAATAGCCCAAAGACTTAAATCTAATCTCTGATACTGTTAAA      |
| plasmid_lp56 | 15726 | BB_Q25  | <b>1.088</b> ± 0.6338 0.836163 | <b>1.348</b> ± 0.8616 0.52531 | <b>1.446</b> ± 0.7589 0.36349 | <b>1.298</b> ± 0.8769 0.67107 | AGTATATAAAAATGATGTTGTCAAAGTGAATATCGTTATTTTATCAAAA     |
| plasmid_lp56 | 15729 | BB_Q25  | <b>2.190</b> ± 0.804 0.017051  | <b>1.843</b> ± 1.4633 0.32702 | <b>0.994</b> ± 0.2824 0.96732 | <b>1.042</b> ± 0.298 0.74108  | GTGCAATTAGCCCAAAGACTTTAAATCTAATCTCTGATACTGTTAAAATTA   |

|              |       |         |             |                                |                               |                               |                               |                                                      |
|--------------|-------|---------|-------------|--------------------------------|-------------------------------|-------------------------------|-------------------------------|------------------------------------------------------|
| plasmid_ip56 | 16027 | BB_Q26  |             | <b>2.938</b> ± 2.6993 0.16018  | <b>1.259</b> ± 1.3553 0.06716 | <b>1.91</b> ± 2.6136 0.60404  | <b>0.672</b> ± 1.0395 0.00432 | CCAATTCGAAATTATTGCTAATCTTAAATCCATACTAGTAATTATACCAT   |
| plasmid_ip56 | 16274 | BB_Q26  |             | <b>2.351</b> ± 0.7097 0.019127 | <b>1.176</b> ± 1.1264 0.79396 | <b>0.655</b> ± 0.2081 0.07119 | <b>0.962</b> ± 0.5333 0.91164 | TGTGCTTTGTTGCTTGTATAGTAGTTGAAATATTTATTAATCAAGTTA     |
| plasmid_ip56 | 16277 | BB_Q26  |             | <b>1.959</b> ± 0.2963 0.007239 | <b>1.783</b> ± 0.3992 0.0915  | <b>1.265</b> ± 0.5917 0.46067 | <b>2.065</b> ± 1.0277 0.18815 | TATCCTTTTTTCTCAGCGCATGTTTTGAATATGGAGTTAATTTATAG      |
| plasmid_ip56 | 16541 | BB_Q27  |             | <b>1.471</b> ± 0.3331 0.145104 | <b>1.27</b> ± 0.3253 0.17875  | <b>1.013</b> ± 0.4193 0.96057 | <b>1.73</b> ± 0.3637 0.04317  | AGTGCACCCGGTTTTCAATTTTGAAGAAAAGATTAAAGCTTAT          |
| plasmid_ip56 | 16608 | BB_Q27  |             | <b>0.873</b> ± 0.9009 0.452247 | <b>1.218</b> ± 1.3189 0.60291 | <b>0.642</b> ± 0.5942 0.43721 | <b>0.925</b> ± 0.7908 0.86785 | AAGCAGTGCGAACCCGCGTGAAGTTGTGCTTTTAGAAGAAATGTTCTT     |
| plasmid_ip56 | 16705 | BB_Q27  |             | <b>1.394</b> ± 0.3999 0.006152 | <b>0.551</b> ± 0.3777 0.03316 | <b>0.447</b> ± 0.1002 0.03587 | <b>0.885</b> ± 0.4243 0.60424 | GTAATCTAATATTAATAGTCTAAATTTAAAGCAAAACTTTGGGAGACAT    |
| plasmid_ip56 | 16907 | BB_Q27  |             | <b>1.823</b> ± 1.0735 0.040127 | <b>0.66</b> ± 0.5624 0.58394  | <b>1.064</b> ± 0.6479 0.49279 | <b>0.942</b> ± 0.4736 0.69233 | GTTTTAAGGTCAGTTTATACTTTACTTTTACATATAAACATATTTCTTTT   |
| plasmid_ip56 | 16942 | BB_Q27  |             | <b>4.965</b> ± 3.0927 0.146931 | <b>2.284</b> ± 1.856 0.33351  | <b>1.148</b> ± 0.5596 0.66258 | <b>2.024</b> ± 0.5603 0.0874  | TCCCTAATTTGAGAGTCAATATTTAAGTAGAGGTAGTTTTAAAGCTCAAGT  |
| plasmid_ip56 | 16949 | BB_Q27  |             | <b>1.016</b> ± 0.6722 0.934316 | <b>0.307</b> ± 0.2394 0.17575 | <b>1.053</b> ± 0.5695 0.16014 | <b>0.879</b> ± 0.984 0.74591  | TTCTAGGATTTTCAAATAACTATTCGTATATGGGAATCAGCTTGAATA     |
| plasmid_ip56 | 17032 | BB_Q27  |             | <b>1.055</b> ± 0.7946 0.937796 | <b>0.725</b> ± 0.6325 0.61696 | <b>0.815</b> ± 0.1709 0.25315 | <b>0.457</b> ± 0.3488 0.20872 | AAGGAATTAAGTTTATGGAATAAGTGCTTGTATTAAGATACAGACACTG    |
| plasmid_ip56 | 17337 | BB_Q28  |             | <b>2.671</b> ± 1.4285 0.037638 | <b>1.619</b> ± 1.3375 0.29895 | <b>0.857</b> ± 0.4227 0.40907 | <b>0.925</b> ± 0.4146 0.73891 | GAAAATATAAAATCAAGATATATTGCAATATGGATATCTCAAGTTTTATCT  |
| plasmid_ip56 | 17587 | BB_Q28  |             | <b>1.698</b> ± 1.1929 0.41327  | <b>1.679</b> ± 1.7167 0.56591 | <b>0.909</b> ± 0.2952 0.63847 | <b>1.03</b> ± 0.3542 0.8968   | CTACATTTATTTCCGCTAGCCTAAGAAAGGAAACGACTAAAAAGATAA     |
| plasmid_ip56 | 17779 | BB_Q28  |             | <b>1.680</b> ± 0.8831 0.002817 | <b>0.374</b> ± 0.2773 0.24153 | <b>0.845</b> ± 0.4648 0.34831 | <b>0.994</b> ± 0.6017 0.97639 | CAGATGGTAACAATATTTAACTTTTAAACAATAAGGAGGTTTTATGGCTG   |
| plasmid_ip56 | 17788 | BB_Q28  |             | <b>1.636</b> ± 0.149 0.019652  | <b>1.178</b> ± 0.4194 0.54655 | <b>1.015</b> ± 0.1173 0.85163 | <b>1.222</b> ± 0.7222 0.64378 | ACAATATTATAACTTTTAAACAATAAGGAGGTTTTATGGCTGATGATCAAG  |
| plasmid_ip56 | 17813 | BB_Q28  |             | <b>1.066</b> ± 0.9525 0.549535 | <b>1.58</b> ± 2.2069 0.57103  | <b>0.635</b> ± 0.7771 0.10288 | <b>1.321</b> ± 1.3126 0.45795 | AGGAGGTTTTATGGCTGATGATCAAGAAAAATTAATAATGATGAAGAAGA   |
| plasmid_ip56 | 17919 | BB_Q29  |             | <b>1.004</b> ± 0.5178 0.988986 | <b>0.535</b> ± 0.5434 0.48235 | <b>1.014</b> ± 0.6904 0.94942 | <b>1.115</b> ± 0.7244 0.4999  | AAAGATCAGTATCGTTAACGGTCGTAACCTTATTTAAATCTTTTATTTGAA  |
| plasmid_ip56 | 18115 | BB_Q29  |             | <b>1.888</b> ± 1.0338 0.080011 | <b>1.609</b> ± 1.5381 0.43665 | <b>0.912</b> ± 0.4499 0.08884 | <b>0.981</b> ± 0.5013 0.43825 | ATTAATTTGTCGGTATTTTAGCATAAAATTTTCTACAAAATCTTTATCA    |
| plasmid_ip56 | 18267 | BB_Q29  |             | <b>1.927</b> ± 0.7407 0.032716 | <b>0.983</b> ± 0.6363 0.96663 | <b>1.259</b> ± 0.5602 0.09157 | <b>0.952</b> ± 0.4287 0.88392 | TATGTTTTAGGAACGGGTGTTTTTGAATAGTATCTGATGAAGCATTATCA   |
| plasmid_ip56 | 18279 | BB_Q29  |             | <b>1.972</b> ± 0.774 0.049873  | <b>0.996</b> ± 0.649 0.98365  | <b>0.923</b> ± 0.3362 0.14293 | <b>0.963</b> ± 0.6124 0.87471 | CCATCAAATTTACTTATGGCAGCATAACTAGAAGTACTACACTTTATCCT   |
| plasmid_ip56 | 18326 | BB_Q29  |             | <b>3.296</b> ± 1.5021 0.031334 | <b>1.808</b> ± 1.5662 0.37628 | <b>1.261</b> ± 0.4999 0.04822 | <b>1.185</b> ± 0.5135 0.01114 | TCCTCTGACTATGAGAATAAAGCGGATATCTATAATATGGAAGACAATGA   |
| plasmid_ip56 | 18668 | IG 1420 |             | <b>1.818</b> ± 0.5673 0.012827 | <b>0.669</b> ± 0.2323 0.28676 | <b>1.062</b> ± 0.3821 0.64541 | <b>0.927</b> ± 0.494 0.8218   | TATCAAAATCGTAATTTTTGCTAAAAAGCTTACAGTTTTAAAAGATCTGG   |
| plasmid_ip56 | 18833 | BB_Q30  | <i>blyA</i> | <b>2.447</b> ± 1.2075 0.106437 | <b>1.786</b> ± 0.7381 0.08793 | <b>0.822</b> ± 0.5237 0.39444 | <b>0.774</b> ± 0.5332 0.31802 | AAAGACATATTGACTATTGTAATAGGCAAGATTTTTAAGAAATGGTAATGGT |
| plasmid_ip56 | 18851 | BB_Q30  | <i>blyA</i> | <b>1.032</b> ± 0.4108 0.751532 | <b>0.453</b> ± 0.3784 0.29656 | <b>0.932</b> ± 0.3756 0.48672 | <b>0.975</b> ± 0.4135 0.68639 | CAATAGTCAATATGCTTTTAGTAAAGGCTTGAGAAGAATTAATACTCTA    |
| plasmid_ip56 | 18854 | BB_Q30  | <i>blyA</i> | <b>2.480</b> ± 2.0472 0.323681 | <b>1.932</b> ± 1.6995 0.14718 | <b>1.454</b> ± 0.8892 0.31093 | <b>1.57</b> ± 1.0865 0.05681  | ATAGGCAAGATTTTAAAGAAATGGTAATGGTAATGGCAAAATACATTAAA   |
| plasmid_ip56 | 18939 | BB_Q31  | <i>blyB</i> | <b>2.237</b> ± 1.5672 0.293526 | <b>2.718</b> ± 3.014 0.40027  | <b>1.008</b> ± 1.1258 0.99078 | <b>0.716</b> ± 0.3067 0.40611 | ATGTTGAGCTGGACTTACGCTTTATCAACCCCTTATTGATATTTTTCTA    |
| plasmid_ip56 | 19200 | BB_Q31  | <i>blyB</i> | <b>1.658</b> ± 1.3684 0.19448  | <b>1.778</b> ± 1.6337 0.18767 | <b>1.085</b> ± 0.9502 0.79198 | <b>0.793</b> ± 0.622 0.73367  | GATATTTGAGATTTTTTATCAGAATTAAGTCAATGATCATTGATTG       |
| plasmid_ip56 | 19242 | BB_Q31  | <i>blyB</i> | <b>2.946</b> ± 2.3998 0.25547  | <b>0.796</b> ± 0.3104 0.31114 | <b>0.902</b> ± 0.865 0.8171   | <b>0.739</b> ± 0.3436 0.44535 | AGGAAGAACAATAATGCAAAAATCAACATTTGGTTTTAGGACTTAATTTA   |
| plasmid_ip56 | 19285 | BB_Q32  |             | <b>5.349</b> ± 2.9793 0.063849 | <b>1.705</b> ± 1.2396 0.46825 | <b>0.53</b> ± 0.5388 0.43563  | <b>0.846</b> ± 1.1272 0.82392 | AGTCTAAACCAATAGTGTATTTTGCATTATTTGTTCTTCTTATAGAT      |
| plasmid_ip56 | 19306 | BB_Q32  |             | <b>0.912</b> ± 0.7261 0.60427  | <b>1.075</b> ± 0.6728 0.73531 | <b>0.759</b> ± 0.4142 0.4315  | <b>0.407</b> ± 0.2588 0.15181 | GTTAAGCTGGATAGTAAATTAAGTCTAAACCAATAGTGTATTTTGCATT    |
| plasmid_ip56 | 19390 | BB_Q32  |             | <b>1.937</b> ± 1.5894 0.100428 | <b>1.983</b> ± 2.3213 0.35962 | <b>0.738</b> ± 0.4754 0.34696 | <b>1.184</b> ± 0.9373 0.20945 | TATGTTTTGTAGAAAAATCTATTACTTTACTAAAAGTATTAATGTAATTA   |
| plasmid_ip56 | 19392 | BB_Q32  |             | <b>1.716</b> ± 0.6897 0.007504 | <b>1.495</b> ± 0.9458 0.24165 | <b>0.854</b> ± 0.4825 0.22133 | <b>1.287</b> ± 0.7414 0.24647 | TATATGTTTTGTAGAAAAATCTATTACTTTACTAAAAGTATTAATGTAAT   |
| plasmid_ip56 | 19393 | BB_Q32  |             | <b>2.523</b> ± 1.4533 0.163978 | <b>1.314</b> ± 0.8374 0.55484 | <b>0.609</b> ± 0.3152 0.37189 | <b>1.301</b> ± 0.7097 0.59845 | TAAGCACACTAAAATCTATGGAACAGCTGAGTCAACTAAAATATTTGAAG   |
| plasmid_ip56 | 19395 | BB_Q32  |             | <b>2.090</b> ± 0.9455 0.073098 | <b>1.728</b> ± 1.4304 0.37376 | <b>1.093</b> ± 0.483 0.5306   | <b>1.071</b> ± 0.403 0.34931  | AGCACACTAAAATCTATGGAACAGCTGAGTCAACTAAAATATTTGAAGAA   |
| plasmid_ip56 | 19479 | BB_Q32  |             | <b>3.037</b> ± 1.0164 0.059001 | <b>1.322</b> ± 1.0664 0.63198 | <b>0.751</b> ± 0.1936 0.2848  | <b>0.849</b> ± 0.1453 0.19229 | TTATCTCAATGTTGATTTTTAAATGCTTGTATTTCTTCAAATATTTAG     |
| plasmid_ip56 | 19910 | BB_Q33  |             | <b>1.011</b> ± 0.4886 0.95079  | <b>0.567</b> ± 0.5663 0.19747 | <b>0.994</b> ± 0.7091 0.98212 | <b>1.121</b> ± 0.6505 0.23258 | TAGACTTTTTCCGCTATTGGTTTTGTTTTTAAATGACTCTAAATATATG    |
| plasmid_ip56 | 19974 | IG 1421 |             | <b>1.618</b> ± 0.6521 0.039302 | <b>1.652</b> ± 1.375 0.38915  | <b>0.962</b> ± 0.3153 0.60627 | <b>1.074</b> ± 0.3712 0.0703  | AAATAGAAATTTCTGCAAGAAAAACCTTTTTGTAATTTACATTTTTAACTG  |
| plasmid_ip56 | 19981 | IG 1422 |             | <b>2.052</b> ± 1.128 0.07233   | <b>1.544</b> ± 1.7309 0.53114 | <b>0.71</b> ± 0.4464 0.46024  | <b>0.762</b> ± 0.505 0.61314  | TAAAAATCTCTAAAGCCAATTAATCTAAAATAGTATATAATATGACCATAA  |
| plasmid_ip56 | 20735 | BB_Q34  | <i>bdrW</i> | <b>1.793</b> ± 1.2656 0.340143 | <b>1.105</b> ± 0.7193 0.65994 | <b>1.001</b> ± 0.6557 0.99865 | <b>1.206</b> ± 0.7153 0.70373 | TTTAGAAATGAAAGCAAAATATTAGCCCGGCTATCATTGTGATAGACATTGC |
| plasmid_ip56 | 21792 | BB_Q37  |             | <b>0.951</b> ± 0.3623 0.77552  | <b>0.881</b> ± 0.4351 0.50414 | <b>0.827</b> ± 0.3358 0.61936 | <b>1.488</b> ± 1.037 0.55724  | TATTAATTTTTTCTTACCTTCATTTACCAATTTTTTATTAATTAACAGTG   |
| plasmid_ip56 | 22085 | BB_Q37  |             | <b>1.040</b> ± 0.5595 0.641685 | <b>1.028</b> ± 0.4884 0.94942 | <b>1.422</b> ± 0.4859 0.2087  | <b>0.987</b> ± 0.3729 0.93592 | GCTGCACCAACAAGTTGTGGCATTGTATTCAAAATTTTAAAGCCATTTTCA  |
| plasmid_ip56 | 22518 | IG 1423 |             | <b>0.920</b> ± 0.4096 0.752739 | <b>0.663</b> ± 0.5701 0.53146 | <b>0.799</b> ± 0.3987 0.62475 | <b>0.94</b> ± 0.5305 0.88026  | GCAAAAATCTTTTTGCCAATTTTTTACAAAAATTTTTACAAAAAATAG     |
| plasmid_ip56 | 24151 | BB_Q39  |             | <b>2.495</b> ± 1.2309 0.123166 | <b>1.976</b> ± 1.1552 0.23027 | <b>1.401</b> ± 1.0138 0.52308 | <b>1.004</b> ± 1.1265 0.99536 | GATTATCATTGAGGCTTATTTAATGGGGAAGAATTGTTGAAGAAACTC     |
| plasmid_ip56 | 26910 | IG 1424 |             | <b>1.807</b> ± 0.7088 0.157518 | <b>1.768</b> ± 1.8537 0.52239 | <b>1.069</b> ± 0.5486 0.83914 | <b>1.224</b> ± 0.5092 0.41127 | GGAGTAAAAAGATGGAAAATCTTTCAAACAATAATAATCCACAAGAAAATA  |
| plasmid_ip56 | 26946 | BB_Q43  | <i>bppA</i> | <b>1.369</b> ± 1.513 0.484436  | <b>0.781</b> ± 0.7297 0.77194 | <b>0.997</b> ± 0.7002 0.99692 | <b>1.993</b> ± 1.2831 0.00407 | ATCCACAAGAAAATTTCAAGGAGAGCTCAAATGATAAGTATTAATCAAC    |
| plasmid_ip56 | 27279 | BB_Q43  | <i>bppA</i> | <b>1.100</b> ± 0.9204 0.813909 | <b>0.558</b> ± 0.6637 0.45901 | <b>0.64</b> ± 0.8005 0.50895  | <b>0.389</b> ± 0.3102 0.30961 | TGCTCAAGGGCAAGAGTTAGAGAATTTAGGATTTAGAGA              |
| plasmid_ip56 | 27384 | BB_Q43  | <i>bppA</i> | <b>0.215</b> ± 0.3013 0.202738 | <b>0.715</b> ± 0.7489 0.71617 | <b>1.831</b> ± 1.6284 0.3292  | <b>0.687</b> ± 0.5113 0.30014 | TCAACCCGTTGGCATATTTATTTTTATATAAAATATCAATATTATCACCG   |
| plasmid_ip56 | 27513 | BB_Q43  | <i>bppA</i> | <b>2.664</b> ± 0.8142 0.011759 | <b>1.325</b> ± 0.7663 0.30229 | <b>0.944</b> ± 0.2579 0.78619 | <b>1.203</b> ± 0.3929 0.3828  | TGAGTAGTGCTATTGCTGAGTACAATAAAATGGCAATTTTTTAAAGCAGTA  |
| plasmid_ip56 | 27647 | BB_Q43  | <i>bppA</i> | <b>3.269</b> ± 2.3215 0.09379  | <b>2.139</b> ± 2.3425 0.36579 | <b>1.032</b> ± 0.5916 0.78351 | <b>1.178</b> ± 0.7676 0.39124 | GATGCTGCACCAATTAAGTAAAGATTTAAAGAGATGAGGCCCTAATATCA   |
| plasmid_ip56 | 27753 | BB_Q43  | <i>bppA</i> | <b>1.826</b> ± 0.6604 0.069879 | <b>1.818</b> ± 1.6706 0.46174 | <b>1.098</b> ± 0.3574 0.716   | <b>1.128</b> ± 0.4026 0.3689  | TCTTTTTCAAATTTATAATTTCTAATTCACATTTATTAACAAATTCAAAC   |

|              |       |          |             |                                |                               |                               |                               |                                                       |
|--------------|-------|----------|-------------|--------------------------------|-------------------------------|-------------------------------|-------------------------------|-------------------------------------------------------|
| plasmid_lp56 | 27757 | BB_Q43   | <i>bppA</i> | <b>1.118</b> ± 0.4876 0.587129 | <b>0.914</b> ± 1.5913 0.94032 | <b>0.36</b> ± 0.3995 0.00283  | <b>0.57</b> ± 0.3148 0.29239  | AATATCTTTTTCAAATTTATAATTTCTAATTCACATTTATTAACAAATTC    |
| plasmid_lp56 | 27762 | BB_Q43   | <i>bppA</i> | <b>1.647</b> ± 0.4333 0.122985 | <b>1.03</b> ± 0.3616 0.91068  | <b>0.888</b> ± 0.4204 0.36291 | <b>0.837</b> ± 0.2949 0.00297 | GTAACACTAGAGAGGAATCTTAATGGCACATAATTTAACGAGGATACCTG    |
| plasmid_lp56 | 27765 | BB_Q43   | <i>bppA</i> | <b>1.871</b> ± 1.3954 0.180626 | <b>1.816</b> ± 1.6603 0.30956 | <b>1.097</b> ± 0.6002 0.39859 | <b>1.042</b> ± 0.4883 0.84099 | ACTATAGAGAGGAATACTTAATGGCACATAATTTAACGAGGATACGTTTA    |
| plasmid_lp56 | 27896 | BB_Q43   | <i>bppA</i> | <b>1.051</b> ± 0.3293 0.771892 | <b>2.072</b> ± 1.7566 0.33431 | <b>0.789</b> ± 0.7508 0.52845 | <b>0.701</b> ± 0.308 0.03418  | GAATATGTTGATTTGCGACAGCTTGAAATTTAACTCAATCTCGGATTA      |
| plasmid_lp56 | 27898 | BB_Q43   | <i>bppA</i> | <b>1.069</b> ± 0.404 0.34762   | <b>0.859</b> ± 0.3393 0.41223 | <b>0.925</b> ± 0.3623 0.50426 | <b>1.129</b> ± 0.4305 0.10545 | TTCTATAAAATCTCTTACCAATCAAACCTCAACTCAGAACTATAAAAAATC   |
| plasmid_lp56 | 28068 | BB_Q43   | <i>bppA</i> | <b>2.049</b> ± 0.9377 0.115973 | <b>1.401</b> ± 0.8275 0.43137 | <b>0.931</b> ± 0.3564 0.53283 | <b>0.605</b> ± 0.2411 0.0762  | ATATTGTAAATAGCATCTTCAACCTATCTTAAATGGGCTTTCTTTTTTT     |
| plasmid_lp56 | 28071 | BB_Q43   | <i>bppA</i> | <b>1.773</b> ± 1.1792 0.416363 | <b>2.37</b> ± 2.0441 0.34525  | <b>0.616</b> ± 0.4542 0.44469 | <b>1.145</b> ± 0.5687 0.68406 | CGAATACATATCCACTAATTTGAGCAGTTAAATATAAAATTTGGAGAGTTTG  |
| plasmid_lp56 | 28387 | BB_Q44   | <i>bppB</i> | <b>1.694</b> ± 0.6664 0.246845 | <b>1.342</b> ± 1.3866 0.74582 | <b>1.121</b> ± 0.5144 0.72854 | <b>1.535</b> ± 1.2119 0.57786 | TAATAATGTAGACACAAAAGTAACAACCCCATTTTTGTATCTCCAGTCTT    |
| plasmid_lp56 | 28445 | BB_Q44   | <i>bppB</i> | <b>1.906</b> ± 1.0591 0.228988 | <b>1.629</b> ± 1.5174 0.53261 | <b>0.645</b> ± 0.4593 0.34241 | <b>1.123</b> ± 0.312 0.64256  | TAGATTTATAGGACTTGGATATATTAAGAGCAATTTGTTTTATTATAAATCT  |
| plasmid_lp56 | 28626 | BB_Q44   | <i>bppB</i> | <b>0.812</b> ± 0.2755 0.00345  | <b>0.545</b> ± 0.3469 0.20152 | <b>1.015</b> ± 0.3805 0.93605 | <b>0.845</b> ± 0.5533 0.65926 | GCAACAAAAAATAAGAAATATTATATGATTCACCTTGACTTAAAGCCACGT   |
| plasmid_lp56 | 29064 | BB_Q45   | <i>bppC</i> | <b>3.181</b> ± 2.0517 0.107186 | <b>2.01</b> ± 2.1805 0.41384  | <b>0.684</b> ± 0.2648 0.16983 | <b>0.915</b> ± 0.3422 0.75699 | TGTGCTGTTTGGATAGCCTCGAAGCTTCTGAGTTGATAACAATTTCTCTA    |
| plasmid_lp56 | 30975 | IG 1425  |             | <b>1.259</b> ± 0.5835 0.283719 | <b>0.641</b> ± 0.4888 0.43726 | <b>0.878</b> ± 0.5366 0.51412 | <b>0.918</b> ± 0.4856 0.761   | ATTACTGACTGTAAGTGTATCCTTTAATTTCTTCAAATTTAGAATTT       |
| plasmid_lp56 | 31261 | BB_Q48   |             | <b>3.375</b> ± 0.8836 0.032138 | <b>2.447</b> ± 2.7443 0.44475 | <b>1.004</b> ± 0.2756 0.97152 | <b>1.918</b> ± 0.9502 0.2087  | ACTAGCCAAATAACTCTAAGCAAAAAAGACAAATATACAGTGCCTGTTGAA   |
| plasmid_lp56 | 32145 | BB_Q49   |             | <b>2.032</b> ± 2.0157 0.187521 | <b>1.381</b> ± 1.8539 0.58032 | <b>1.517</b> ± 1.3866 0.2554  | <b>1.294</b> ± 1.2358 0.34693 | TCTAATTCACCTATAACTTTCTAGCGTTAACTCTGATCTAAAGGTTTGC     |
| plasmid_lp56 | 32442 | BB_Q49   |             | <b>1.094</b> ± 0.454 0.394264  | <b>0.454</b> ± 0.3269 0.21002 | <b>0.875</b> ± 0.2545 0.12052 | <b>0.925</b> ± 0.3157 0.03621 | CTATTTTTGTAGTTGCTTTTGTCTTTCAGCCTCATTAGCAGTTGTAAGTTTT  |
| plasmid_lp56 | 32539 | BB_Q50   |             | <b>1.450</b> ± 0.7563 0.083033 | <b>0.943</b> ± 0.8036 0.61898 | <b>0.577</b> ± 0.3871 0.35062 | <b>0.842</b> ± 0.5751 0.09324 | AAGCTAACAAATTTCTCAATTAATTTTGATAAGTTGAAGAAGAGCAGCTA    |
| plasmid_lp56 | 32596 | BB_Q50   |             | <b>2.876</b> ± 3.1574 0.37371  | <b>3.022</b> ± 2.3985 0.18679 | <b>1.506</b> ± 0.7562 0.12602 | <b>1.141</b> ± 0.5477 0.38083 | AAACAAAAAATGTGATAAAAAGCATTAAAAAGAATAATGAAAAAAGATT     |
| plasmid_lp56 | 32939 | BB_Q50   |             | <b>0.887</b> ± 0.4027 0.130489 | <b>0.437</b> ± 0.4041 0.2936  | <b>1.044</b> ± 0.6342 0.77313 | <b>0.936</b> ± 0.5084 0.19186 | CTTCCCTAAATCTTTCAAATCACTGGCTTATCTCCACCATGTAGATTA      |
| plasmid_lp56 | 32942 | BB_Q50   |             | <b>1.151</b> ± 0.9413 0.421061 | <b>0.448</b> ± 0.3756 0.3846  | <b>0.92</b> ± 0.6101 0.82682  | <b>0.872</b> ± 0.6666 0.55979 | ATTCAGCACTTATTTTTGTTAATGAGGCTACAACCTTACACAAGCAAACCT   |
| plasmid_lp56 | 33084 | BB_Q50   |             | <b>3.414</b> ± 1.3548 0.051495 | <b>1.711</b> ± 0.7516 0.15067 | <b>0.884</b> ± 0.2782 0.14411 | <b>1.064</b> ± 0.4367 0.85132 | ATCGGTTTTAAAATAGTGTCTGGATGATCAGGATTAGTACAAAAATAAT     |
| plasmid_lp56 | 33198 | BB_Q50   |             | <b>2.754</b> ± 1.7612 0.151241 | <b>1.123</b> ± 0.4159 0.02081 | <b>0.87</b> ± 0.5247 0.39284  | <b>1.285</b> ± 0.5216 0.2113  | TGATGGTATATCTTTATAGAGCTTTTCTGTGTTTCGATAAATCCTTTACT    |
| plasmid_lp56 | 33200 | BB_Q50   |             | <b>3.989</b> ± 3.132 0.093326  | <b>2.021</b> ± 1.6096 0.09744 | <b>1.194</b> ± 1.1711 0.46065 | <b>1.102</b> ± 0.7674 0.72085 | TATGATGGTATATCTTTATAGAGCTTTTCTGTGTTTCGATAAATCCTTTA    |
| plasmid_lp56 | 33371 | BB_Q50   |             | <b>1.146</b> ± 0.6261 0.790864 | <b>1.625</b> ± 1.5583 0.55485 | <b>0.768</b> ± 0.6668 0.64022 | <b>0.402</b> ± 0.2349 0.05225 | AGTATTATGCTTTTGTATTTCAAGCAACGACCAGCCAAATGACCCGTATA    |
| plasmid_lp56 | 33680 | BB_Q50   |             | <b>0.304</b> ± 0.3307 0.199897 | <b>0.259</b> ± 0.2462 0.22864 | <b>0.462</b> ± 0.3473 0.21261 | <b>0.318</b> ± 0.4223 0.22695 | TTTATTCGTATAAAGGAGATAACAACCCATGATGATGCTCTGATGCAGAA    |
| plasmid_lp56 | 33767 | BB_Q50   |             | <b>2.597</b> ± 2.6331 0.196594 | <b>1.368</b> ± 1.6389 0.11166 | <b>0.667</b> ± 0.7309 0.57133 | <b>1.233</b> ± 1.2355 0.72369 | GAGAGAGAAGTGTCACTTTGGCAATCAAAGATTTTTGTAATTTTTATTGA    |
| plasmid_lp56 | 33903 | BB_Q51   |             | <b>3.702</b> ± 2.4026 0.117423 | <b>2.541</b> ± 1.8232 0.17983 | <b>1.42</b> ± 0.7053 0.27828  | <b>1.602</b> ± 0.8407 0.22691 | GATAAAAATAGTTCACAGCAACTATAATAACTCAATTTTTTGAATAAT      |
| plasmid_lp56 | 34086 | BB_Q51   |             | <b>2.372</b> ± 1.1127 0.059966 | <b>1.739</b> ± 1.2248 0.3058  | <b>0.302</b> ± 0.1011 0.07165 | <b>1.093</b> ± 0.7733 0.84485 | AGCTACCGTTTTTCATGGGATGGCTATGTTTTAGTGAAAAACCAAGATACC   |
| plasmid_lp56 | 34202 | BB_Q51   |             | <b>1.783</b> ± 0.8379 0.229404 | <b>1.767</b> ± 1.1918 0.40088 | <b>1.135</b> ± 0.7361 0.49465 | <b>1.147</b> ± 0.487 0.57271  | TTCATAATCAAGTATTCAAACCAATAGGTAATTTCTATATTAACGGGCTG    |
| plasmid_lp56 | 34205 | BB_Q51   |             | <b>1.868</b> ± 0.3236 0.024467 | <b>1.499</b> ± 0.8454 0.3443  | <b>0.799</b> ± 0.2071 0.17898 | <b>1.009</b> ± 0.2656 0.87477 | TGTAAGAGATTTGGGAGTTGATTTTTGATCATATAACCTATAAAGTAAAAATC |
| plasmid_lp56 | 34206 | BB_Q51   |             | <b>1.249</b> ± 0.3993 0.440262 | <b>0.546</b> ± 0.3942 0.12584 | <b>1.088</b> ± 0.2532 0.65839 | <b>1.116</b> ± 0.3678 0.67184 | CATATTCATAATCAAGGTATCAAACCAATAGGTAATTTCTATATTAACGG    |
| plasmid_lp56 | 34234 | BB_Q51   |             | <b>2.371</b> ± 2.8369 0.443999 | <b>0.93</b> ± 1.0391 0.91026  | <b>1.289</b> ± 0.5335 0.49786 | <b>1.464</b> ± 1.5189 0.61383 | TGATCAAAAATCAACTCCAAAATCTCTTACATATTCATAATCAAGGTATTC   |
| plasmid_lp56 | 34297 | BB_Q51   |             | <b>3.365</b> ± 1.1827 0.065945 | <b>2.213</b> ± 3.1997 0.56313 | <b>0.672</b> ± 0.5122 0.2756  | <b>1.755</b> ± 0.7964 0.19832 | AAAGTCGACTTATCATATATGAAAACCTTTGATTATATCTTAAAAAGATATG  |
| plasmid_lp56 | 34385 | BB_Q51   |             | <b>2.264</b> ± 1.4737 0.116963 | <b>2.556</b> ± 2.5638 0.30951 | <b>0.808</b> ± 0.4483 0.47658 | <b>1.292</b> ± 0.8741 0.35286 | TTTATTTGAAAAGATATACGTAGAATAAGAAAGAGCTATTGAAAACCCACAA  |
| plasmid_lp56 | 34551 | BB_Q51   |             | <b>1.956</b> ± 0.8192 0.181307 | <b>1.946</b> ± 1.493 0.38839  | <b>1.051</b> ± 0.2343 0.79277 | <b>1.11</b> ± 0.1235 0.11682  | TCTTCTTTTTGAGAAAACAAAATCAAACAATCATAGTAAAGATATTTCT     |
| plasmid_lp56 | 34851 | BB_Q51   |             | <b>3.431</b> ± 2.5072 0.043007 | <b>2.531</b> ± 3.7191 0.4261  | <b>0.997</b> ± 0.6714 0.99471 | <b>1.009</b> ± 0.8153 0.98944 | GGAGTAATTTACGATTTTCTCAAAGGTGACAAAGAACAAAGTTGAGAATC    |
| plasmid_lp56 | 35219 | BB_Q52   |             | <b>1.331</b> ± 0.9379 0.61366  | <b>0.979</b> ± 0.7768 0.8746  | <b>0.792</b> ± 0.6841 0.58027 | <b>1.243</b> ± 0.8531 0.10928 | CATGCGTTTTAAAGAGCAGGCAAAATAGTAAATCTAAAGAGACAAGTCGAGA  |
| plasmid_lp56 | 35440 | BB_Q52   |             | <b>0.976</b> ± 1.1144 0.957844 | <b>0.899</b> ± 1.0038 0.77778 | <b>1.049</b> ± 0.9177 0.85715 | <b>1.036</b> ± 0.8397 0.54671 | CATTAAGACATTATGCAAGCACAACTGAGAGAACTGTACGCAAGTTCCG     |
| plasmid_lp56 | 35445 | BB_Q52   |             | <b>2.938</b> ± 2.0842 0.123142 | <b>2.481</b> ± 3.1003 0.45153 | <b>0.806</b> ± 0.6422 0.71028 | <b>0.963</b> ± 0.6803 0.89366 | AAAGACATTATGCAAGCACAACTGAGAGAACTGTACGCAAGTTCCGTTCCA   |
| plasmid_lp56 | 35556 | BB_Q52   |             | <b>1.370</b> ± 0.6568 0.095211 | <b>0.326</b> ± 0.2505 0.16449 | <b>0.909</b> ± 0.7139 0.69414 | <b>1.175</b> ± 0.7389 0.51363 | TTAGAGCAACTTTTCTTTAGCAAAAAGTGAATATAAATTAAGAAAAAAT     |
| plasmid_lp56 | 35635 | BB_Q52   |             | <b>1.670</b> ± 0.7944 0.159546 | <b>1.399</b> ± 1.3809 0.60296 | <b>1.099</b> ± 0.3172 0.48495 | <b>0.84</b> ± 0.2027 0.43715  | GAGTCAACAGAGAAGAAATTTGCTTACTCGCATTTTTCTAATTTAATTTCT   |
| plasmid_lp56 | 35724 | BB_Q52   |             | <b>0.866</b> ± 1.0617 0.86178  | <b>1.547</b> ± 1.0961 0.40265 | <b>0.599</b> ± 0.7227 0.32073 | <b>0.192</b> ± 0.1948 0.04667 | CAAGCGATAAGTAATACTTACAAGCAAAGACGAATTTCAATTTTATGAAAAT  |
| plasmid_lp56 | 36243 | BB_Q53   |             | <b>1.531</b> ± 1.0358 0.204387 | <b>1.234</b> ± 0.5952 0.00164 | <b>0.824</b> ± 0.3512 0.39854 | <b>1.02</b> ± 0.5014 0.93997  | ATGCACAAGGAGAGCTTGAAAAGAAATGGGGGAAATGATAAATCTGTTAATG  |
| plasmid_lp56 | 36477 | BB_Q54   |             | <b>4.692</b> ± 3.3451 0.157777 | <b>1.162</b> ± 0.3079 0.47892 | <b>1.25</b> ± 0.8293 0.56261  | <b>1.401</b> ± 0.4816 0.18731 | GGAGCAGCTGGAATTTCTGATTTCAACCTAATTTGTGATTATCATCAACA    |
| plasmid_lp56 | 36709 | BB_Q54   |             | <b>3.603</b> ± 1.5142 0.000613 | <b>1.552</b> ± 0.6418 0.22212 | <b>1.327</b> ± 0.9022 0.5172  | <b>1.204</b> ± 0.5907 0.57924 | TTCTTCTATTTTGTCTGCAAGCTTGAACATGTAAAAGAATAAGCATTAAAC   |
| plasmid_lp56 | 36894 | BB_Q54   |             | <b>1.529</b> ± 1.151 0.465003  | <b>2.361</b> ± 2.4322 0.36897 | <b>0.698</b> ± 0.596 0.33288  | <b>0.754</b> ± 0.3843 0.52492 | ACAAGATACCTTCAAAGTTATTCGTAATTTGTAATACATACGCAAGTACTA   |
| plasmid_lp56 | 36935 | BB_Q55   |             | <b>2.405</b> ± 1.1822 0.055263 | <b>1.573</b> ± 1.5908 0.54041 | <b>0.64</b> ± 0.213 0.17604   | <b>0.718</b> ± 0.311 0.34123  | TATCCAATATTTCTCCATTTTTATACTCGGATTTCTGTAAACAAGATACC    |
| plasmid_lp56 | 50441 | BB_Q0091 |             | <b>3.391</b> ± 0.7395 5.15E-05 | <b>1.104</b> ± 0.5137 0.55951 | <b>1.46</b> ± 0.7259 0.35144  | <b>0.756</b> ± 0.1708 0.2618  | AAACCCCTGTAGAAATATCTGAAATATTAGAAAAATCCAAAAGTAACTCT    |
| plasmid_lp56 | 50472 | IG 1426  |             | <b>1.881</b> ± 0.8045 0.179795 | <b>1.283</b> ± 0.5755 0.50823 | <b>1.135</b> ± 0.5707 0.60616 | <b>0.799</b> ± 0.3552 0.52518 | GCTAAAACATAATCAACATGAAGTTGATTCTAAAACCTGTTAGAATATCTT   |
| plasmid_lp56 | 50664 | IG 1427  |             | <b>1.050</b> ± 0.6632 0.946647 | <b>1.438</b> ± 0.9608 0.36175 | <b>0.577</b> ± 0.483 0.08988  | <b>0.507</b> ± 0.1963 0.0949  | ATAGGGGGCTAATTCATTATGGATGGAGTAATTAACAATACATT          |

|              |       |         |                                |                               |                               |                               |                                                      |
|--------------|-------|---------|--------------------------------|-------------------------------|-------------------------------|-------------------------------|------------------------------------------------------|
| plasmid_lp56 | 50960 | IG 1428 | <b>1.928</b> ± 2.1089 0.210704 | <b>0.519</b> ± 0.5867 0.26573 | <b>0.804</b> ± 0.7808 0.29663 | <b>0.684</b> ± 0.6393 0.67573 | TTTATATATTTTTAGTTTTAATTGTTCTTTATTAGGCCTATGAGACACTA   |
| plasmid_lp56 | 51010 | IG 1429 | <b>1.959</b> ± 0.7098 0.006902 | <b>2.485</b> ± 1.359 0.08782  | <b>1.152</b> ± 0.6207 0.36872 | <b>1.463</b> ± 0.6867 0.061   | TAGTGCTCATAGGCCTAATAAAGAACAATTAACCTAAAAATATATAAA     |
| plasmid_lp56 | 51056 | IG 1430 | <b>1.660</b> ± 1.749 0.480967  | <b>2.368</b> ± 2.3884 0.2457  | <b>1.269</b> ± 1.1699 0.66361 | <b>0.913</b> ± 1.0347 0.92321 | TAATTTAAAAATATGGTATCACCCCATACACCTTAAACAACCTTTAGA     |
| plasmid_lp56 | 51163 | IG 1431 | <b>1.549</b> ± 0.3761 0.074913 | <b>1.877</b> ± 1.8123 0.47265 | <b>1.214</b> ± 0.2757 0.27175 | <b>1.112</b> ± 0.2622 0.55518 | ATGATATTAAGAGAAACATCTTTAGTATATTACTAAAGGTGTTCTCC      |
| plasmid_lp56 | 51166 | IG 1432 | <b>0.622</b> ± 1.0097 0.705367 | <b>0.516</b> ± 0.6432 0.31041 | <b>0.381</b> ± 0.7367 0.50418 | <b>0.871</b> ± 1.0647 0.80547 | TATAGTCTATTTATAGTAGTTCATAATTTTGTGTAACATATTTTAAAGG    |
| plasmid_lp56 | 51353 | BB_Q85  | <b>2.012</b> ± 1.5817 0.367653 | <b>0.691</b> ± 0.4494 0.49228 | <b>1.362</b> ± 0.8993 0.54808 | <b>1.632</b> ± 1.9244 0.58919 | TTGCAATATCTATCTATGTTAAAGTAAACGCACGGCGTATAAAGCCCCTA   |
| plasmid_lp56 | 51362 | BB_Q85  | <b>2.242</b> ± 2.0813 0.429427 | <b>0.701</b> ± 0.6851 0.63503 | <b>0.383</b> ± 0.2665 0.26278 | <b>0.782</b> ± 0.5729 0.71942 | GATATTGCAATACTAGTAAAGATATTGAAATAGACATAGACTTATTAATAA  |
| plasmid_lp56 | 51409 | BB_Q85  | <b>1.034</b> ± 0.9973 0.87732  | <b>1.062</b> ± 0.9816 0.82629 | <b>0.789</b> ± 0.7473 0.69429 | <b>0.735</b> ± 0.6695 0.56438 | GTATCCAATATTTTTGAATTTAGGTCAATGTTGTTAGTGTGTAATAAG     |
| plasmid_lp56 | 51749 | IG 1433 | <b>1.954</b> ± 0.5646 0.103424 | <b>1.331</b> ± 0.6742 0.48582 | <b>0.856</b> ± 0.4735 0.66557 | <b>1.404</b> ± 0.4664 0.28808 | TATGATTTATTATAAAATTAATCCCCCTTAAAGTGTTCGTTCAACAATAC   |
| plasmid_lp56 | 51799 | IG 1434 | <b>1.619</b> ± 1.7119 0.601996 | <b>1.772</b> ± 1.643 0.25832  | <b>2.134</b> ± 2.0605 0.19642 | <b>1.936</b> ± 2.0226 0.20657 | GAAAAACAACCATAGTAAACTATCTTTAAAAACAGTCCAAATAT         |
| plasmid_lp56 | 51905 | IG 1435 | <b>1.292</b> ± 0.674 0.201538  | <b>1.045</b> ± 0.4695 0.84199 | <b>0.914</b> ± 0.5554 0.51956 | <b>0.876</b> ± 0.5306 0.07627 | TTCAATTCTAGATTTAATAATGTATTGCACATAAAGCAGGCATACCCAG    |
| plasmid_lp56 | 52069 | IG 1436 | <b>1.385</b> ± 1.077 0.514898  | <b>1.285</b> ± 1.3103 0.73826 | <b>1.621</b> ± 1.177 0.32104  | <b>0.843</b> ± 0.6685 0.79822 | TTATGAAAAAATCAAAAAACAAGTGCTCAGAAATAGAAAAACAACA       |
| plasmid_lp56 | 52151 | BB_Q88  | <b>1.211</b> ± 1.6239 0.804167 | <b>1.585</b> ± 2.4158 0.64593 | <b>0.568</b> ± 0.4882 0.27866 | <b>0.696</b> ± 0.4727 0.49859 | ATTCTTAACAAATGCTCCATTTATTAGTGTGTTAGTAAATAACTA        |
| plasmid_lp56 | 52189 | BB_Q88  | <b>1.995</b> ± 1.1786 0.137438 | <b>0.795</b> ± 0.5014 0.47487 | <b>0.619</b> ± 0.4287 0.43144 | <b>0.596</b> ± 0.4473 0.43897 | TACCAACTACATAATAAATGGAGACAATTTGTTAAGAATTTAGCAACTT    |
| plasmid_lp56 | 52190 | BB_Q88  | <b>1.571</b> ± 1.4973 0.366654 | <b>1.668</b> ± 1.7354 0.37196 | <b>0.866</b> ± 0.9772 0.71408 | <b>1.983</b> ± 1.266 0.02956  | TAGTAATACTACTACTATCAGCATTATTGTTAATGCTAGGCATGATT      |
| plasmid_lp56 | 52481 | BB_Q88  | <b>1.211</b> ± 0.9628 0.722228 | <b>1.489</b> ± 1.2763 0.47584 | <b>0.736</b> ± 0.585 0.65952  | <b>0.72</b> ± 0.5959 0.35432  | GTTTGAATATAAGGTGGGTAGTTAATAGTAGAATTAATTATCATTTTTGG   |
| plasmid_lp56 | 52501 | BB_Q88  | <b>1.591</b> ± 1.3063 0.454275 | <b>3.075</b> ± 2.9752 0.32416 | <b>1.000</b> ± 0.2589 0.9917  | <b>1.062</b> ± 0.4755 0.80603 | GTTAATAGTAGAATTAATATTATCATTTTTGGTTAGTAATAATGGTTGAACG |

<sup>a</sup> Samples with >10 sequences in all 3 glucose cultures

<sup>b</sup> % of total reads following growth in specified carbohydrate/% total reads following growth in glucose

<sup>c</sup> p-value was obtained using a Ttest

<sup>d</sup> A fitness value of 0 indicates that insertions in this gene were not present in the population following growth in GlcNAc

Table S4: Tn-seq and STM results for the transport and ip54 mutants

| Location     | Position | Locus   | Gene  | Strand   | Mean Fitness | Fitness Value | Fitness Value Group 1 <sup>a</sup> | Fitness Value Group 2 | Group 1 Culture <sup>a</sup> |                  |            |                  | Group 2 Culture <sup>a</sup> |                  |            |                  | STM Data <sup>a</sup>                             |                                    | Plasmids Missing in Arrayed Frozen                  | Sequence of Insertion site                         |
|--------------|----------|---------|-------|----------|--------------|---------------|------------------------------------|-----------------------|------------------------------|------------------|------------|------------------|------------------------------|------------------|------------|------------------|---------------------------------------------------|------------------------------------|-----------------------------------------------------|----------------------------------------------------|
|              |          |         |       |          |              |               |                                    |                       | # of Reads                   | % of Total Reads | # of Reads | % of Total Reads | # of Reads                   | % of Total Reads | # of Reads | % of Total Reads | STM Mutant Name                                   | % of Tissues Positive <sup>b</sup> |                                                     |                                                    |
| chr          | 41270    | BB_0042 | phoU  | +        | 0.00         | 0.00          | 0.00                               | 3568                  | 0.00                         | 7748             | 0.15       | 0.00             | 7051C153                     | 0.00             | 24.79      | none             | GATGATTACAGTACAGTATGAGAGATTCCTGGGAGAAATATTCGAACCT |                                    |                                                     |                                                    |
| chr          | 48460    | BB_0051 | +     | 0.01     | 4.01E-03     | 0.02          | 73708                              | 1.52                  | 310                          | 5.08E-03         | 24814      | 0.47             | 263                          | 0.01             | 1020P1A01  | 71.28            | 1821.33                                           | cp28                               | TCCTAAATCAACTTAACTTCTCCGAAAGAAATTAATGAAGCT          |                                                    |
| chr          | 113343   | BB_0116 | malX1 | +        | 9.33E-05     | 1.87E-04      | 0.00                               | 20449                 | 0.42                         | 4                | 7.84E-05   | 21851            | 0.42                         | 0                | 0.00       | 708P02E04        | 0.00                                              | 38.95                              | ip28-2, ip5                                         | TCTGATAAACAATCTTAAAGCCAAAGAAATTAATGAAGCT           |
| chr          | 113729   | BB_0116 | malX1 | -        | 4.45E-05     | 0.00          | 8.98E-05                           | 26477                 | 0.54                         | 0                | 0.00       | 20211            | 0.39                         | 1                | 3.46E-05   | 706T1C05         | 0.00                                              | 49.57                              | ip5                                                 | TGTTTGGACTGCCCGAGCAGCTTAGGGGTTTCAAGGGTATTTGTCATG   |
| chr          | 114543   | BB_0116 | malX1 | -        | 8.91E-05     | 1.42E-04      | 3.61E-05                           | 87217                 | 1.79                         | 13               | 2.55E-04   | 50249            | 0.96                         | 1                | 3.46E-05   | 706T04A9         | 41.67                                             | 188.36                             | none                                                | CGAGTCAAAATTAAGGGGTTTGGTAGGGGCACTTCTTAATTTTGTG     |
| chr          | 141502   | BB_0140 | bseB  | +        | 9.31         | 5.18          | 13.45                              | 6511                  | 0.13                         | 35365            | 0.69       | 7121             | 0.14                         | 52790            | 1.83       | 71113385         | 93.33                                             | 3038.00                            | ip5                                                 | TTCTTAAGCTTCCAGGAGCTTACAGATTAAGCAATATTCCTCATC      |
| chr          | 142878   | BB_0141 | bseC  | +        | 1.95         | 0.94          | 2.95                               | 23359                 | 0.48                         | 23067            | 0.45       | 22739            | 0.43                         | 37095            | 1.28       | 706T0259         | 6.67                                              | 48.96                              | ip5                                                 | TTCTAGTTTTACTGTTCTGGTGATACAGCAAGTAGTACAGAAAT       |
| chr          | 143306   | BB_0142 | bseC  | +        | 0.00         | 0.00          | 0.00                               | 4133                  | 0.08                         | 0                | 0.00       | 2815             | 0.05                         | 0                | 0.00       | 710T0C92         | 0.00                                              | 499.71                             | ip5                                                 | AACTTAATTAATAAAGAGTCAAAAACAGTCAGTAAAGACCCCTGG      |
| chr          | 144594   | BB_0143 | hlyA  | -        | 0.09         | 0.18          | 1.06E-04                           | 15689                 | 0.32                         | 2896             | 0.06       | 17068            | 0.33                         | 1                | 3.46E-05   | 706T4137         | 13.33                                             | 64.93                              | ip5, cp9                                            | TTTGATTAATCTTTTAAATCTTTAAGGATCTCAAAATGGGTTGTG      |
| chr          | 164996   | BB_0164 | +     | 4.99E-05 | 9.97E-05     | 0.00          | 105178                             | 2.16                  | 11                           | 2.16E-04         | 9233       | 1.76             | 0                            | 0.00             | 111P02D04  | 6.67             | 53.96                                             | cp32-6, ip5                        | TGGTAAATTAAGGGGTTTGGTAGGGGCACTTCTTAATTTTGTG         |                                                    |
| chr          | 245916   | BB_0240 | glpP  | +        | 15.26        | 10.48         | 20.04                              | 46329                 | 0.95                         | 509225           | 0.99       | 23319            | 0.44                         | 257625           | 8.91       | 709T3279         | 26.67                                             | 250.11                             | ip5                                                 | TTTCTCTGGTATTCGGGAGCTGGAGAAATATTCCTAGTCCGCAACG     |
| chr          | 246904   | BB_0243 | glpD  | +        | 0.98         | 0.56          | 1.40                               | 245177                | 5.04                         | 144545           | 2.83       | 88404            | 1.69                         | 68409            | 2.37       | 704T219          | 66.67                                             | 226.79                             | none                                                | TAAATTTTCTGTTTGGATTTTGAAGTTTCTTGACGTTGTG           |
| chr          | 325023   | BB_0318 | mgpA  | +        | 1.87E-04     | 9.54E-05      | 2.78E-04                           | 29996                 | 0.62                         | 3                | 5.88E-05   | 6.53E+03         | 0.12                         | 1                | 3.46E-05   | 110T0C55         | 0.00                                              | 14.39                              | ip5                                                 | CATCCAAATTTTCTGTTAAGCCTACTCACTAATCCCTCCATCA        |
| chr          | 335333   | BB_0328 | oppA1 | +        | 3.52         | 1.70          | 5.34                               | 27353                 | 0.56                         | 48801            | 0.96       | 21653            | 0.41                         | 63789            | 2.21       | 703T0C95         | ND <sup>c</sup>                                   | ND                                 | none                                                | TTTGATTTTAAATTAAGATCACTAGTCAGCGTTTCTTAATTTTAA      |
| chr          | 337852   | BB_0329 | oppA2 | +        | 8.03E-05     | 1.61E-04      | 0.00                               | 11871                 | 0.24                         | 2                | 3.92E-05   | 1.01E+04         | 0.19                         | 0                | 0.00       | 711T1C45         | 20.00                                             | 186.39                             | ip5                                                 | TGTTGTCATCTTGGTTTCAAGCTCACTCAATATTAATTTTGTG        |
| chr          | 421166   | BB_0408 | fruA1 | +        | 0.05         | 2.25E-04      | 0.11                               | 16956                 | 0.35                         | 4                | 7.84E-05   | 2.14E+04         | 0.41                         | 1294             | 0.04       | 707T4273         | 0.00                                              | 19.75                              | ip5                                                 | ACACATCTCTAAATTAAGAGAAATCCACCACTTTCTCCAAAGTG       |
| chr          | 586734   | BB_0573 | +     | 9.32E-03 | 0.02         | 0.00          | 1995                               | 0.04                  | 39                           | 7.65E-04         | 1.11E+02   | 1.2E-03          | 0                            | 0.00             | 703T3C10   | 0.00             | 23.04                                             | ip5                                | AACTTAAGATCTTTTAAAACATTTTGAACCAATTAAGCACTAT         |                                                    |
| chr          | 630181   | BB_0604 | lcp   | +        | 0.00         | 0.00          | 0.00                               | 178                   | 3.66E-03                     | 0                | 0.00       | 1.58E+02         | 3.01E-03                     | 0                | 0.00       | 710P01A01        | 0.00                                              | 24.71                              | ip28-1                                              | ACTGGATTAATCTTGTATTCATGGATGGTCCCACTAATCTCT         |
| chr          | 661151   | BB_0629 | fruA2 | +        | 0.00         | 0.00          | 0.00                               | 11380                 | 2.02                         | 0                | 0.00       | 9.50E+03         | 0.18                         | 0                | 0.00       | 711P02A09        | 0.00                                              | 34.95                              | none                                                | ATCTTTAGCAAAATTAAGCACTAAGCACTAATGACCAATCACT        |
| chr          | 661155   | BB_0629 | fruA2 | +        | 1.41         | 0.31          | 2.51                               | 95141                 | 1.96                         | 31423            | 0.62       | 6.27E+04         | 1.20                         | 86829            | 3.00       | 705T0225         | 75.00                                             | 5297.91                            | none                                                | AGTAAATCTTAGCAAACTTAAGCACTAAGCACTAAGTACCAAT        |
| chr          | 675469   | BB_0637 | hnaC1 | +        | 0.00         | 0.00          | 0.00                               | 6226                  | 0.13                         | 0                | 0.00       | 2.35E+03         | 0.04                         | 0                | 0.00       | 704T415          | 6.67                                              | 39.75                              | cp32-6, ip5                                         | TTAGCTTTTGTAGTAAATTAATCTTCTAGTATGTAAGAAACATTA      |
| chr          | 676847   | BB_0638 | hnaC2 | +        | 3.63E-05     | 0.00          | 0.00                               | 727E-05               | 0.22                         | 0.46             | 0.00       | 2.50E+04         | 0.48                         | 1                | 3.46E-05   | 703T0C62         | 0.00                                              | 28.86                              | none                                                | CTATAAATCAATGATTAAGCACTAATGACCACTAAGCACTAAG        |
| chr          | 684113   | BB_0645 | ptgA  | +        | 0.00         | 0.00          | 0.00                               | 10825                 | 0.22                         | 0                | 0.00       | 8.73E+03         | 0.17                         | 0                | 0.00       | 710T0C91         | 0.00                                              | 25.18                              | ip5, ip28-2                                         | TTTATTTGCCATTTGGCAACAGCCCTGGGGGATCTGTTAATGAT       |
| chr          | 775398   | BB_0733 | chbA  | +        | 9.38E-05     | 6.74E-05      | 1.20E-04                           | 70718                 | 1.45                         | 5                | 9.81E-05   | 3.02E+04         | 0.58                         | 2                | 6.92E-05   | 111P01A09        | 0.00                                              | 34.77                              | ip5                                                 | TTGTTTGAAGAAATTAAGCACTAAGCACTAAGTATGTTGATCTG       |
| chr          | 861578   | BB_0814 | panF  | +        | 2.11         | 1.37          | 2.86                               | 3140                  | 0.06                         | 4496             | 0.09       | 4.16E+03         | 0.08                         | 6566             | 0.23       | 706T0C81         | 86.67                                             | 535.18                             | cp9, ip5                                            | TTTTTTTCAAAATTAATTAAGCACTAAGCACTAAGTATGATCTG       |
| plasmid_cp26 | 2500     | BB_0814 | chbC  | +        | 0.00         | 0.00          | 0.00                               | 6226                  | 0.13                         | 0                | 0.00       | 2.35E+03         | 0.04                         | 0                | 0.00       | 704T415          | 6.67                                              | 39.75                              | ip21, ip5                                           | ATCTAAATTAAGTATGATTAAGCACTAAGCACTAAGCACTAAG        |
| plasmid_cp26 | 3542     | BB_004  | chbC  | +        | 1.79         | 2.95          | 0.63                               | 74613                 | 1.53                         | 231178           | 4.53       | 12342            | 2.35                         | 42897            | 1.48       | 709T0C43         | 86.67                                             | 106.25                             | ip5                                                 | TGCTTAATTTTGTGTTTGGTATTTGATTTGATTTGATTTGATTTG      |
| plasmid_cp26 | 4228     | BB_005  | chbA  | +        | 0.56         | 0.15          | 0.98                               | 69686                 | 1.43                         | 10628            | 0.21       | 121225           | 2.31                         | 65357            | 2.26       | 705T295          | 73.33                                             | 1921.04                            | cp9, ip5                                            | TAGTAGCTGCTGCTCATCTCTTTGTTGGCATCTTAAGCTG           |
| plasmid_cp26 | 19120    | BB_029  | ptuG1 | +        | 9.93E-05     | 1.81E-04      | 1.72E-05                           | 84083                 | 1.73                         | 16               | 3.14E-04   | 2.02             | 2                            | 6.92E-05         | 703T0C86   | 0.00             | 28.14                                             | ip5                                | AGTAAATTAAGCACTAAGCACTAAGCACTAAGCACTAAGCACTAAG      |                                                    |
| plasmid_cp26 | 25105    | BB_029  | malX2 | +        | 0.01         | 0.03          | 3.39E-05                           | 64378                 | 1.32                         | 1744             | 0.03       | 106975           | 2.04                         | 2                | 6.92E-05   | 704T0C08         | 66.67                                             | 787.09                             | none                                                | TAGTAAATTAAGCACTAAGCACTAAGCACTAAGCACTAAGCACTAAG    |
| plasmid_ip5  | 15339    | BB_029  | pnxA  | +        | 0.05         | 6.96E-05      | 1.31E-05                           | 89651                 | 1.82                         | 9                | 7.84E-04   | 100099           | 1.91                         | 1                | 3.46E-05   | 709P01C04        | 33.33                                             | 1795.95                            | ip5                                                 | AGTAAATTAAGCACTAAGCACTAAGCACTAAGCACTAAGCACTAAG     |
| plasmid_ip5  | 19646    | BB_026  | +     | 0.89     | 0.26         | 1.53          | 9739                               | 0.20                  | 2634                         | 0.05             | 19241      | 0.37             | 16191                        | 0.56             | 707T0C43   | 100.00           | 5550.18                                           | none                               | GAAGTAAATTAAGCACTAAGCACTAAGCACTAAGCACTAAGCACTAAG    |                                                    |
| plasmid_ip5  | 2388     | BB_004  | +     | 0.16     | 0.32         | 0.00          | 7409                               | 0.15                  | 2508                         | 0.05             | 14911      | 0.28             | 0                            | 0.00             | 708T1C41   | 6.67             | 22.82                                             | ip5                                | ATTAATTAAGCACTAAGCACTAAGCACTAAGCACTAAGCACTAAG       |                                                    |
| plasmid_ip5  | 2796     | BB_004  | +     | 5.46     | 5.86         | 5.06          | 55718                              | 1.15                  | 342545                       | 6.72             | 84336      | 1.61             | 235135                       | 8.13             | 709T1C89   | 13.33            | 1360.64                                           | ip5                                | GGAATTAAGCACTAAGCACTAAGCACTAAGCACTAAGCACTAAGCACTAAG |                                                    |
| plasmid_ip5  | 4123     | BB_005  | +     | 0.19     | 0.37         | 6.15E-05      | 33343                              | 0.64                  | 12170                        | 0.24             | 29905      | 0.56             | 1                            | 3.46E-05         | 710T1C88   | 53.33            | 478.43                                            | ip5                                | CTCTAAATTAAGCACTAAGCACTAAGCACTAAGCACTAAGCACTAAG     |                                                    |
| plasmid_ip5  | 4249     | BB_011  | chbA  | +        | 0.07         | 2.21E-04      | 0.15                               | 17280                 | 0.36                         | 4                | 7.84E-05   | 21021            | 0.40                         | 1688             | 0.06       | 704T413          | 46.67                                             | 148.46                             | ip5, cp9                                            | AAATTAAGCACTAAGCACTAAGCACTAAGCACTAAGCACTAAGCACTAAG |
| plasmid_ip5  | 5049     | BB_007  | chpA1 | +        | 1.16         | 1.02          | 1.31                               | 12469                 | 0.26                         | 13275            | 0.28       | 17957            | 0.34                         | 12974            | 0.45       | 710T0C85         | 93.33                                             | 2440.71                            | ip5                                                 | AACTTAAGCACTAAGCACTAAGCACTAAGCACTAAGCACTAAGCACTAAG |
| plasmid_ip5  | 5278     | IG 1    | +     | 1.34     | 2.68         | 0.00          | 1420                               | 0.03                  | 1985                         | 0.08             | 4291       | 0.28             | 0                            | 0.00             | 707T1C52   | 6.67             | 38.29                                             | ip5, cp9                           | GAATAAATTAAGCACTAAGCACTAAGCACTAAGCACTAAGCACTAAG     |                                                    |
| plasmid_ip5  | 5658     | BB_009  | +     | 0.82     | 1.50         | 0.14          | 126441                             | 2.60                  | 399299                       | 3.91             | 143775     | 2.74             | 11481                        | 0.40             | 708T0C84   | 20.00            | 82.29                                             | ip21                               | TTTAAATTAAGCACTAAGCACTAAGCACTAAGCACTAAGCACTAAG      |                                                    |
| plasmid_ip5  | 6541     | BB_010  | +     | 1.75     | 1.39         | 2.11          | 62095                              | 1.28                  | 90504                        | 1.77             | 78544      | 1.49             | 91132                        | 3.15             | 705T404    | 26.67            | 203.46                                            | ip5                                | TTTAAATTAAGCACTAAGCACTAAGCACTAAGCACTAAGCACTAAG      |                                                    |
| plasmid_ip5  | 7241     | BB_011  | chbA  | +        | 2.44         | 2.17          | 2.72                               | 54006                 | 1.11                         | 122972           | 2.41       | 75640            | 1.43                         | 112335           | 3.88       | 710T0C01         | 26.67                                             | 146.04                             | ip5                                                 | GATTAATTAAGCACTAAGCACTAAGCACTAAGCACTAAGCACTAAG     |
| plasmid_ip5  | 8214     | BB_010  | +     | 0.30     | 0.34         | 0.25          | 48045                              | 0.99                  | 17075                        | 0.33             | 54981      | 1.05             | 8660                         | 0.26             | 707T3C60   | 6.67             | 29.04                                             | ip5                                | TTTAAATTAAGCACTAAGCACTAAGCACTAAGCACTAAGCACTAAG      |                                                    |
| plasmid_ip5  | 8485     | BB_013  | +     | 5.39     | 3.71         | 7.07          | 22335                              | 0.46                  | 66855                        | 1.70             | 31545      | 0.60             | 122860                       | 4.25             | 709T1C67   | 66.67            | 1138.54                                           | ip5                                | TTTAAAGCACTAAGCACTAAGCACTAAGCACTAAGCACTAAGCACTAAG   |                                                    |
| plasmid_ip5  | 8951     | BB_014  | +     | 6.24E-03 | 0.01         | 8.14E-05      | 72866                              | 1.50                  | 948                          | 0.02             | 31363      | 2.55             | 6                            | 2.92E-05         | 711P01G08  | 0.00             | 19.93                                             | ip5, cp9, ip21                     | ATGATGCTTTCATGATCTGATTAAGCACTAAGCACTAAGCACTAAG      |                                                    |
| plasmid_ip5  | 10837    | BB_016  | ospB  | +        | 0.75         | 0.84          | 0.65                               | 59888                 | 1.23                         | 53062            | 1.04       | 66480            | 1.27                         | 23793            | 0.82       | 711T4433         | 60.00                                             | 1375.82                            | ip5, ip21                                           | CTACTTTCATGATCTGATGATCTGATGATCTGATGATCTGATGATCTG   |
| plasmid_ip5  | 15649    | BB_023  | +     | 0.62     | 0.47         | 0.77          | 168189                             | 3.46                  | 83992                        | 1.64             | 109974     | 2.10             | 46662                        | 1.61             | 709T1C85   | 20.00            | 387.00                                            | cp9                                | ATGATGCTTTCATGATCTGATGATCTGATGATCTGATGATCTGATGATCTG |                                                    |
| plasmid_ip5  | 16452    | BB_024  | dbpA  | +        | 1.31E-04     | 1.77E-04      | 8.48E-05                           | 53852                 | 1.11                         | 10               | 1.96E-04   | 85609            | 1.63                         | 4                | 1.38E-04   | 707T0C73         | 0                                                 | 22.57                              | ip21, cp9                                           | ATGCTTTAGGCTTTCATGATCTGATGATCTGATGATCTGATGATCTG    |
| plasmid_ip5  | 16508    | BB_024  | dbpA  | +        | 6.79E-05     | 9.83E-05      | 3.74E-05                           | 87277                 | 1.79                         | 9                | 1.76E-04   | 96957            | 1.85                         | 2                | 6.92E-05   | 709T3C60         | 20.00                                             | 86.61                              | ip5, ip21                                           | TATATAGTAGTAAAGCACTAAGCACTAAGCACTAAGCACTAAGCACTAAG |
| plasmid_ip5  | 16973    | BB_025  | dbpB  | +        | 1.31E-04     | 1.42E-04      | 1.20E-04                           | 40198                 | 0.83                         | 6                | 1.18E-04   | 6010             | 1.15                         | 4                | 1.38E-04   | 705T247          | 13.33                                             | 130.86                             | none                                                | CTCTAATTAAGCACTAAGCACTAAGCACTAAGCACTAAGCACTAAG     |
| plasmid_ip5  | 17877    | IG2     | +     | 1.01</   |              |               |                                    |                       |                              |                  |            |                  |                              |                  |            |                  |                                                   |                                    |                                                     |                                                    |

Table S5. Tn-seq results for mutants not expected in mouse Tn-seq screen

| Location       | Insertion Site | Gene Locus | Gene Name | Strand | Mean Fitness Value | Group 1              |                           |                     |                           | Group 2              |                           |                     |                           |          |          |
|----------------|----------------|------------|-----------|--------|--------------------|----------------------|---------------------------|---------------------|---------------------------|----------------------|---------------------------|---------------------|---------------------------|----------|----------|
|                |                |            |           |        |                    | Culture <sup>a</sup> |                           | Mouse <sup>b</sup>  |                           | Culture <sup>a</sup> |                           | Mouse <sup>b</sup>  |                           |          |          |
|                |                |            |           |        |                    | # of Sequence Reads  | % of Total Sequence Reads | # of Sequence Reads | % of Total Sequence Reads | # of Sequence Reads  | % of Total Sequence Reads | # of Sequence Reads | % of Total Sequence Reads |          |          |
| chromosom      | 16023          | BB_0017    |           | +      | 2.33E-05           | 20443                | 0.42                      | 1                   | 1.96E-05                  | 4.66E-05             | 19876                     | 0.38                | 0                         | 0.00     | 0.00     |
| chromosom      | 16404          | BB_0017    |           | -      | 0.00 <sup>d</sup>  | 1146                 | 0.02                      | 0                   | 0.00                      | 0.00                 | 3470                      | 0.07                | 0                         | 0.00     | 0.00     |
| chromosom      | 48358          | BB_0051    |           | +      | 0.77               | 83829                | 1.72                      | 72985               | 1.43                      | 0.83                 | 18577                     | 0.35                | 7230                      | 0.25     | 0.71     |
| chromosom      | 162049         | BB_0161    |           | -      | 16.10              | 13539                | 0.28                      | 85169               | 1.67                      | 6.00                 | 8990                      | 0.17                | 129877                    | 4.49     | 26.21    |
| chromosom      | 203963         | BB_0202    |           | +      | 0.00               | 3909                 | 0.080                     | 0                   | 0.00                      | 0.00                 | 2487                      | 0.05                | 0                         | 0        | 0        |
| chromosom      | 210905         | BB_0208    |           | +      | 0.00               | 3974                 | 0.08                      | 0                   | 0.00                      | 0.00                 | 2716                      | 0.05                | 0                         | 0.00     | 0.00     |
| chromosom      | 247158         | BB_0241    | glpK      | -      | 0.19               | 4864                 | 0.100                     | 1952                | 0.04                      | 0.38                 | 3547                      | 0.07                | 1                         | 3.46E-05 | 5.11E-04 |
| chromosom      | 259760         | BB_0252    |           | -      | 1.43E-05           | 33239                | 0.68                      | 1                   | 1.96E-05                  | 2.87E-05             | 14792                     | 0.28                | 0                         | 0.00     | 0.00     |
| chromosom      | 259760         | BB_0252    |           | -      | 1.43E-05           | 33239                | 0.683                     | 1                   | 1.96E-05                  | 2.87E-05             | 14792                     | 0.28                | 0                         | 0        | 0        |
| chromosom      | 278726         | BB_0265    |           | -      | 0.00               | 243                  | 5.00E-03                  | 0                   | 0.00                      | 0.00                 | 100                       | 1.91E-03            | 0                         | 0.00     | 0.00     |
| chromosom      | 335795         | BB_0328    |           | +      | 0.69               | 58                   | 1.19E-03                  | 46                  | 9.02E-04                  | 0.76                 | 55                        | 1.05E-03            | 19                        | 6.57E-04 | 0.63     |
| chromosom      | 335960         | BB_0328    |           | -      | 0.98               | 946                  | 0.02                      | 1092                | 0.02                      | 1.10                 | 981                       | 0.02                | 466                       | 0.02     | 0.86     |
| chromosom      | 336240         | BB_0328    |           | -      | 0.86               | 681                  | 0.01                      | 682                 | 0.01                      | 0.96                 | 757                       | 0.01                | 322                       | 0.01     | 0.77     |
| chromosom      | 336408         | BB_0328    |           | +      | 0.92               | 216                  | 4.44E-03                  | 242                 | 4.75E-03                  | 1.07                 | 202                       | 3.85E-03            | 86                        | 2.97E-03 | 0.77     |
| chromosom      | 336495         | BB_0328    |           | +      | 0.85               | 23                   | 4.73E-04                  | 22                  | 4.31E-04                  | 0.91                 | 23                        | 4.38E-04            | 10                        | 3.46E-04 | 0.79     |
| chromosom      | 387418         | BB_0377    | luxS      | -      | 2.75               | 959                  | 0.02                      | 5529                | 0.11                      | 5.50                 | 1407                      | 0.03                | 0                         | 0.00     | 0.00     |
| chromosom      | 433284         | BB_0420    |           | -      | 0.00               | 63085                | 1.30                      | 3                   | 5.88E-05                  | 4.54E-05             | 41195                     | 0.79                | 0                         | 0.00     | 0.00     |
| chromosom      | 476098         | BB_0456    |           | +      | 0.00               | 52                   | 1.07E-03                  | 0                   | 0.00                      | 0.00                 | 645                       | 0.01                | 0                         | 0.00     | 0.00     |
| chromosom      | 576468         | BB_0563    |           | -      | 0.47               | 33503                | 0.69                      | 22323               | 0.44                      | 0.64                 | 36952                     | 0.70                | 6030                      | 0.21     | 0.30     |
| chromosom      | 609976         | BB_0591    |           | -      | 0.66               | 25027                | 0.51                      | 4437                | 0.09                      | 0.17                 | 14410                     | 0.27                | 9181                      | 0.32     | 1.16     |
| chromosom      | 633518         | BB_0607    | pcrA      | -      | 0.00               | 58                   | 1.19E-03                  | 0                   | 0.00                      | 0.00                 | 1138                      | 0.02                | 0                         | 0.00     | 0.00     |
| chromosom      | 644034         | BB_0616    |           | -      | 5.72E-05           | 8335                 | 0.171                     | 1                   | 1.96E-05                  | 1.14E-04             | 4126                      | 0.08                | 0                         | 0        | 0        |
| chromosom      | 675579         | BB_0637    |           | -      | 0.00               | 1404                 | 0.029                     | 0                   | 0.00                      | 0.00                 | 1696                      | 0.03                | 0                         | 0        | 0        |
| chromosom      | 682871         | BB_0644    |           | +      | 3.55E-04           | 3010                 | 0.06                      | 0                   | 0.00                      | 0.00                 | 2555                      | 0.05                | 1                         | 3.46E-05 | 7.10E-04 |
| chromosom      | 708138         | BB_0669    |           | +      | 0.00               | 208                  | 4.28E-03                  | 0                   | 0.00                      | 0.00                 | 207                       | 3.95E-03            | 0                         | 0.00     | 0.00     |
| chromosom      | 761926         | BB_0723    |           | +      | 0.05               | 2812                 | 0.06                      | 0                   | 0.00                      | 0.00                 | 2795                      | 0.05                | 140                       | 4.84E-03 | 0.09     |
| chromosom      | 771307         | BB_0731    |           | +      | 0.00               | 295                  | 0.01                      | 0                   | 0.00                      | 0.00                 | 164                       | 3.13E-03            | 0                         | 0.00     | 0.00     |
| chromosom      | 774466         |            |           | +      | 0.00               | 1060                 | 0.02                      | 0                   | 0.00                      | 0.00                 | 99                        | 1.89E-03            | 0                         | 0.00     | 0.00     |
| chromosom      | 815254         | BB_0773    |           | -      | 4.34E-03           | 59435                | 1.22                      | 289                 | 0.01                      | 4.64E-03             | 68609                     | 1.31                | 153                       | 0.01     | 4.05E-03 |
| chromosom      | 876597         | BB_0830    |           | +      | 0.01               | 47911                | 0.99                      | 61                  | 1.20E-03                  | 1.21E-03             | 28995                     | 0.55                | 312                       | 0.01     | 0.02     |
| chromosom      | 888240         |            |           | -      | 0.00               | 1584                 | 0.03                      | 0                   | 0.00                      | 0.00                 | 1482                      | 0.03                | 0                         | 0.00     | 0.00     |
| chromosom      | 906090         | BB_0848a   |           | +      | 0.24               | 10740                | 0.22                      | 4601                | 0.09                      | 0.41                 | 7363                      | 0.14                | 266                       | 0.01     | 0.07     |
| plasmid_cp32-4 | 23395          | BB_R36     | bppA      | +      | 0.32               | 32131                | 0.66                      | 4110                | 0.08                      | 0.12                 | 42482                     | 0.81                | 12192                     | 0.42     | 0.52     |
| plasmid_cp32-6 | 1185           | BB_M01     |           | -      | 2.73               | 1078                 | 0.02                      | 6163                | 0.12                      | 5.45                 | 1049                      | 0.02                | 0                         | 0.00     | 0.00     |
| plasmid_cp32-7 | 5135           | BB_O07     |           | +      | 0.09               | 14957                | 0.31                      | 2337                | 0.05                      | 0.15                 | 29260                     | 0.56                | 601                       | 0.02     | 0.04     |
| plasmid_cp9    | 8639           | BB_C12     |           | -      | 0.31               | 23116                | 0.48                      | 2956                | 0.06                      | 0.12                 | 30224                     | 0.58                | 8237                      | 0.28     | 0.49     |
| plasmid_lp17   | 12323          | BB_D20     |           | -      | 0.00               | 351                  | 0.01                      | 0                   | 0.00                      | 0.00                 | 436                       | 0.01                | 0                         | 0.00     | 0.00     |
| plasmid_lp21   | 11096          |            |           | +      | 0.26               | 57                   | 1.17E-03                  | 20                  | 3.92E-04                  | 0.33                 | 72                        | 1.37E-03            | 7                         | 2.42E-04 | 0.18     |
| plasmid_lp28-1 | 4837           | BB_F10     |           | +      | 0.00               | 1196                 | 0.02                      | 0                   | 0.00                      | 0.00                 | 1601                      | 0.03                | 0                         | 0.00     | 0.00     |
| plasmid_lp28-1 | 8473           | BB_F16     |           | +      | 4.64E-04           | 1028                 | 0.02                      | 1                   | 1.96E-05                  | 9.28E-04             | 2808                      | 0.05                | 0                         | 0.00     | 0.00     |
| plasmid_lp28-2 | 13899          | BB_G17     |           | -      | 1.37               | 4297                 | 0.09                      | 12369               | 0.24                      | 2.75                 | 5414                      | 0.10                | 0                         | 0.00     | 0.00     |
| plasmid_lp28-2 | 19829          | BB_G24     |           | -      | 5.35               | 14278                | 0.29                      | 38441               | 0.75                      | 2.57                 | 15152                     | 0.29                | 67868                     | 2.35     | 8.13     |
| plasmid_lp28-3 | 20826          | BB_H30     |           | +      | 0.00               | 173                  | 3.56E-03                  | 0                   | 0.00                      | 0.00                 | 1589                      | 0.03                | 0                         | 0.00     | 0.00     |
| plasmid_lp28-3 | 21777          | BB_H32     |           | -      | 0.00               | 1645                 | 0.03                      | 0                   | 0.00                      | 0.00                 | 1296                      | 0.02                | 0                         | 0.00     | 0.00     |
| plasmid_lp36   | 21081          | BB_K32     |           | +      | 0.00               | 1181                 | 0.02                      | 0                   | 0.00                      | 0.00                 | 3674                      | 0.07                | 0                         | 0.00     | 0.00     |
| plasmid_lp36   | 21996          | BB_K34     |           | +      | 3.15E-04           | 1057                 | 0.02                      | 0                   | 0.00                      | 0.00                 | 2883                      | 0.05                | 1                         | 3.46E-05 | 0.00     |
| plasmid_lp36   | 24374          | BB_K39     |           | -      | 1.82E-04           | 10482                | 0.22                      | 4                   | 7.84E-05                  | 3.64E-04             | 20326                     | 0.39                | 0                         | 0.00     | 0.00     |
| plasmid_lp36   | 25961          | BB_K41     |           | -      | 0.00               | 975                  | 0.02                      | 0                   | 0.00                      | 0.00                 | 1208                      | 0.02                | 0                         | 0.00     | 0.00     |
| plasmid_lp36   | 30899          | BB_K48     |           | +      | 0.67               | 1045                 | 0.02                      | 0                   | 0.00                      | 0.00                 | 3219                      | 0.06                | 2364                      | 0.08     | 1.33     |
| plasmid_lp38   | 7922           | BB_J11     |           | +      | 0.00               | 10833                | 0.22                      | 0                   | 0.00                      | 0.00                 | 8687                      | 0.17                | 0                         | 0.00     | 0.00     |
| plasmid_lp54   | 5588           | BB_A08     |           | -      | 0.00               | 455                  | 0.009                     | 0                   | 0.00                      | 0.00                 | 481                       | 0.01                | 0                         | 0        | 0        |
| plasmid_lp54   | 15220          | BB_A22     |           | +      | 7.99E-05           | 41768                | 0.859                     | 7                   | 1.37E-04                  | 1.60E-04             | 43367                     | 0.83                | 0                         | 0        | 0        |
| plasmid_lp54   | 29484          | BB_A43     |           | -      | 1.94               | 17                   | 3.50E-04                  | 53                  | 1.04E-03                  | 2.97                 | 34                        | 6.48E-04            | 17                        | 5.88E-04 | 0.91     |
| plasmid_lp54   | 43967          | BB_A65     |           | -      | 0.69               | 20740                | 0.426                     | 1460                | 0.03                      | 0.07                 | 26966                     | 0.51                | 19388                     | 0.67     | 1.30     |
| plasmid_lp54   | 44656          |            |           | +      | 1.49               | 11724                | 0.24                      | 25432               | 0.50                      | 2.07                 | 17088                     | 0.33                | 8519                      | 0.29     | 0.90     |
| plasmid_lp54   | 45178          | BB_A66     |           | +      | 7.61E-05           | 6267                 | 0.129                     | 1                   | 1.96E-05                  | 1.52E-04             | 4912                      | 0.09                | 0                         | 0        | 0        |
| plasmid_lp54   | 46055          |            |           | -      | 0.00               | 1903                 | 0.04                      | 0                   | 0.00                      | 0.00                 | 6513                      | 0.12                | 0                         | 0.00     | 0.00     |
| plasmid_lp54   | 48155          | BB_A69     |           | +      | 0.39               | 31                   | 6.37E-04                  | 14                  | 2.75E-04                  | 0.43                 | 31                        | 0.00                | 6                         | 2.08E-04 | 0.35     |
| plasmid_lp54   | 52311          | BB_A74     | osm28     | +      | 0.00               | 241                  | 0.005                     | 0                   | 0.00                      | 0.00                 | 954                       | 0.02                | 0                         | 0        | 0        |

IG, Intergenic

<sup>a</sup> Bacterial population recovered from the mouse inoculum grown in culture

<sup>b</sup> Bacterial population isolated from organ cultures from infected mice

<sup>c</sup> % of total reads in population recovered from mice/% total reads in the cultured inoculum

<sup>d</sup> A fitness value of 0 indicates the insertion sequence was not present in the population following mouse infection

**Table S6. Primer sequences used in this study**

| <b>Primer</b>         | <b>Sequence</b>                                                         |
|-----------------------|-------------------------------------------------------------------------|
| p408(KpnI)-F          | 5'-GGGGTACCCCAAAGTATTATTTTAAATAATATAAAAATTGTTTTACC-3'                   |
| pbb407(XbaI)-R        | 5'-GCTCTAGAGCTTAATTAACCAGCAATAAAAGC-3'                                  |
| pMargent1             | 5'-CGGCAAGTTCATCC TTAGGAGACCGGGG-3'                                     |
| olj376                | 5'-GTGACTGGAGTTC AGACGTGTGCTCTTCCGATCTGGGGGGGGGGGGGGGGGG-3'             |
| pMargent2             | 5'-AATGATACGGCGACCACCGAGATCTACACTCTTCCGGGGACTTATCAGCCAACCTGTTA-3'       |
| Indexing Primer       | 5'-CAAGCAGAAGACGGCATAACGAGATNNNNNNGTGACTGGAGTTCAGACGTGTGCTCTTCCGATCT-3' |
| pMargent3             | 5'-ACACTCTTCCGGGGACTTATCAGCCAACCTGTTA-3'                                |
| <i>recA</i> qPCR For  | 5'-GTGGATCTATTGTATTAGATGAGGCTCTCG-3'                                    |
| <i>recA</i> qPCR Rev  | 5'-GCCAAAGTTCTGCAACATTAACACCTAAAG-3'                                    |
| <i>aacC1</i> qPCR For | 5'-GTTTGCCGGATCAAGAGCTA-3'                                              |
| <i>aacC1</i> qPCR Rev | 5'-GCAGAGCGAGGTATGTAGG-3'                                               |
| <i>aadA</i> qPCR For  | 5'-GGCTTGATGAAACAACGCGG-3'                                              |
| <i>aadA</i> qPCR Rev  | 5'-GTCGTCGTGCACAACAATGG-3'                                              |
| <i>ermC</i> qPCR For  | 5'-GAGGTGTAATTCGTAAGTCC-3'                                              |
| <i>ermC</i> qPCR Rev  | 5'-TGGAAATTATCGTGATCAACAAG-3'                                           |
| bb408_For             | 5'-GGATCCTTAATTCGCCCAATCATA-3'                                          |
| bb408_Rev             | 5'-GGATCCTGTTAAGAAAATACAAGTGTGGAG-3'                                    |
| bbb29_For             | 5'-GCCTTCATGCTTCCAATAGCAC-3'                                            |
| bbb29_Rev             | 5'-TCCGCCAGAAAATGTTAGTCCA-3'                                            |
| rrp1_For              | 5'-AAAGATAAAGCTTTGAAGCAGAGA-3'                                          |
| rrp1_Rev              | 5'-TCAAAAAGAATAGCAACTGGCAA-3'                                           |
